# Supplementary material for: Stereo-selective synthesis of non-canonical γ-hydroxy-α-amino acids by enzymatic carbon–carbon bond formation
Source: Royal Society of Chemistry journal article supplement (doi:10.1039/d1cy00955a), 2021-01-01

Supporting Information for the manuscript:

**Stereo-selective synthesis of non-canonical  $\gamma$ -hydroxy- $\alpha$ -amino acids  
by enzymatic carbon-carbon bond formation**

Rui Zhang<sup>a</sup>, Jiamu Tan<sup>a,b</sup>, Zhenzhen Luo<sup>c</sup>, Haihong Dong<sup>a</sup>, Ningshan Ma<sup>a</sup> and Cangsong Liao<sup>a,b,c\*</sup>

<sup>a</sup> Chemical Biology Research Center, Shanghai Institute of Material Medica, Chinese Academy of Science. Shanghai 201203, China.

<sup>b</sup> University of the Chinese Academy of Sciences, Shijingshan District, Beijing 100049, China.

<sup>c</sup> Nanjing University of Chinese Medicine School of Pharmacy, Qixia District, Nanjing 210023, China.

\*To whom correspondence should be addressed: [csliao@simm.ac.cn](mailto:csliao@simm.ac.cn)

## Content

|                                                                     |    |
|---------------------------------------------------------------------|----|
| Supplementary Figure S1-S6.....                                     | 3  |
| X-ray crystallographic analyses of 2c.....                          | 6  |
| Supplementary Tables.....                                           | 7  |
| Supplementary Methods .....                                         | 9  |
| General .....                                                       | 9  |
| Protein expression and purification .....                           | 9  |
| Time dependent Progress of ApUstD reaction.....                     | 11 |
| Determination of conversion and diastereoisomeric ratio (d.r.)..... | 11 |
| Determination of Kinetic Parameters .....                           | 12 |
| Semi-preparative reaction and characterization of Compounds.....    | 12 |
| Preparative scale of ApUstD .....                                   | 25 |
| Supplementary Figure S7-S88 .....                                   | 25 |
| HR-MS and NMR spectra.....                                          | 67 |

## Supplementary Figure S1-S6

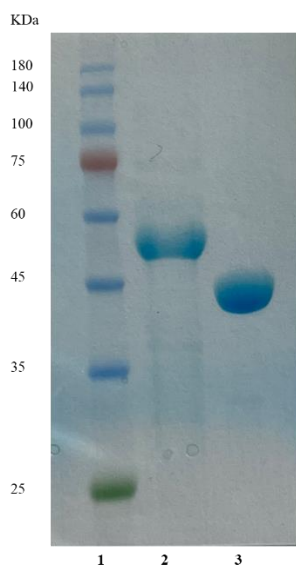

**Figure S1.** SDS PAGE of ApUstD and PfK. Lane 1: protein markers, lane 2: purified ApUstD, lane 3: purified PfK.

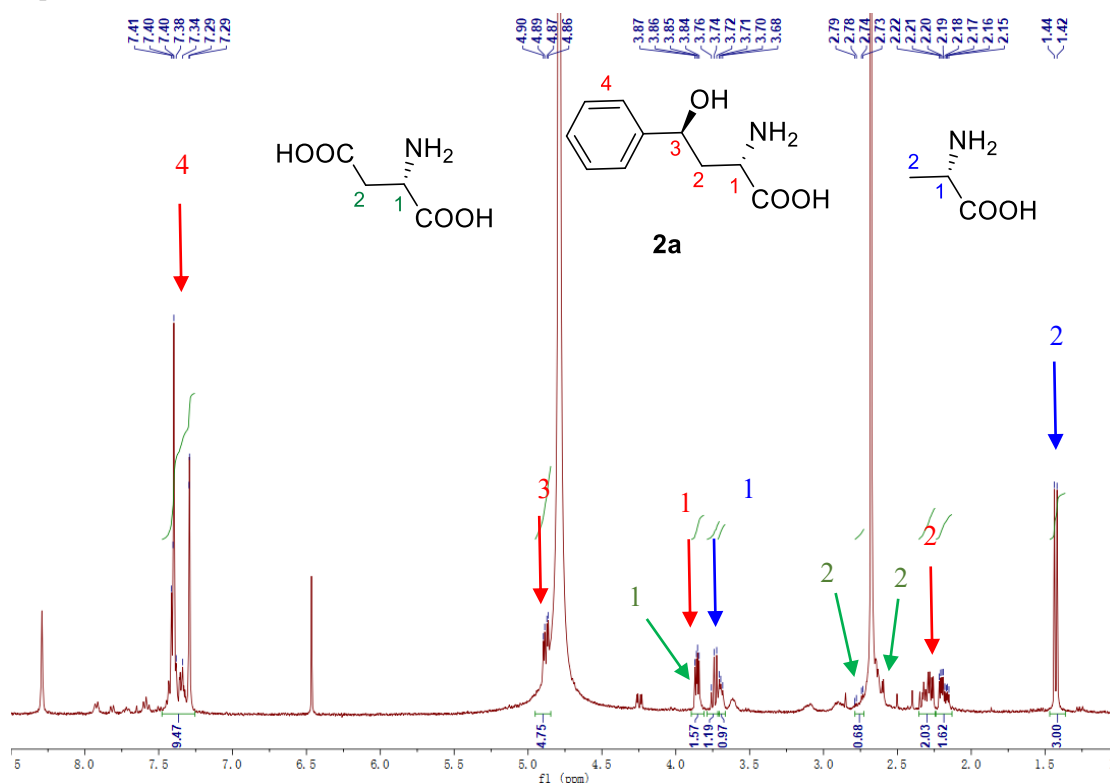

**Figure S2.** ApUstD reaction with L-Asp and benzaldehyde. 1 ml reaction containing 4 mM L-aspartic acid, 5 mM benzaldehyde (**1a**), 1mM dithiothreitol, 100  $\mu$ M PLP and 0.3 mg/ml ApUstD in 50 mM phosphate buffer, at pH 7.4 were run at 25 °C for 24 hours. Reaction mixture was lyophilized, and then was dissolved in 600  $\mu$ l D<sub>2</sub>O. <sup>1</sup>H NMR was recorded thereafter. Resonances of different compound were assigned.

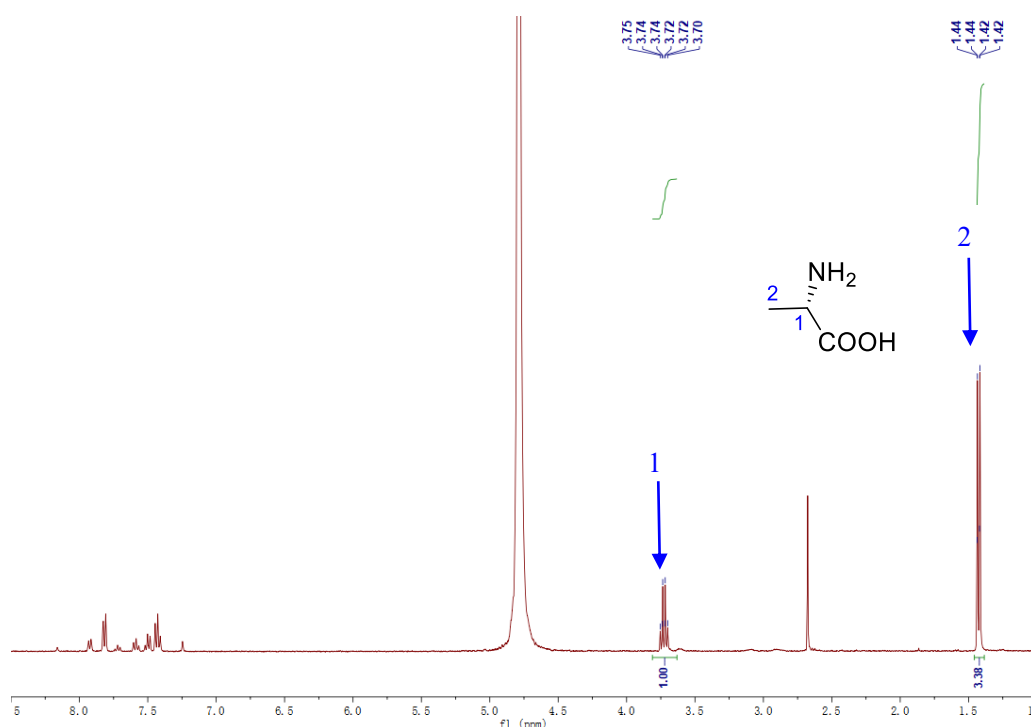

**Figure S3.** ApUstD reaction with  $L$ -Alanine and benzaldehyde. 1 ml reaction containing 4 mM  $L$ -alanine, 5 mM benzaldehyde (**1a**), 1mM dithiothreitol, 100  $\mu$ M PLP and 0.3 mg/ml ApUstD in 50 mM phosphate buffer, at pH 7.4 were run at 25  $^{\circ}$ C for 24 hours. Reaction mixture was lyophilized, and then was dissolved in 600  $\mu$ l  $D_2O$ .  $^1H$  NMR was recorded thereafter. No product was observed.

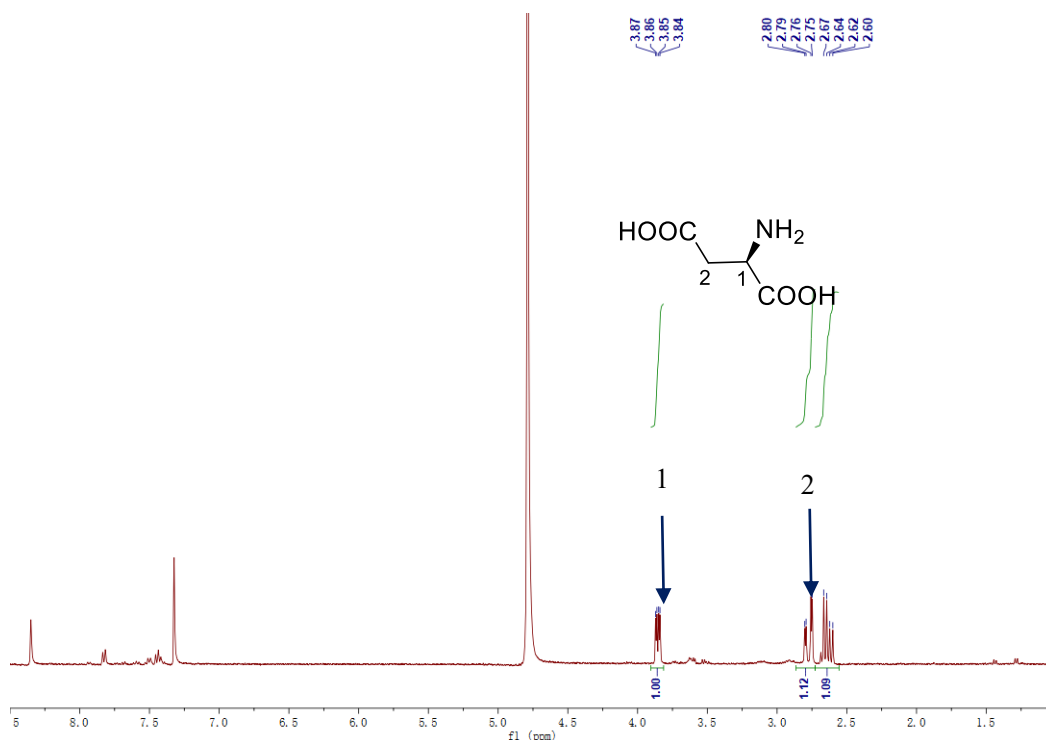

**Figure S4.** ApUstD reaction with  $D$ -Asp and benzaldehyde. 1 ml reaction containing 4 mM  $D$ -aspartic acid, 5 mM benzaldehyde (**1a**), 1mM dithiothreitol, 100  $\mu$ M PLP and 0.3 mg/ml ApUstD in 50 mM phosphate buffer, at pH 7.4 were run at 25  $^{\circ}$ C for 24 hours. Reaction mixture was lyophilized, and then was dissolved in 600  $\mu$ l  $D_2O$ .  $^1H$  NMR was recorded thereafter. No product



was observed.

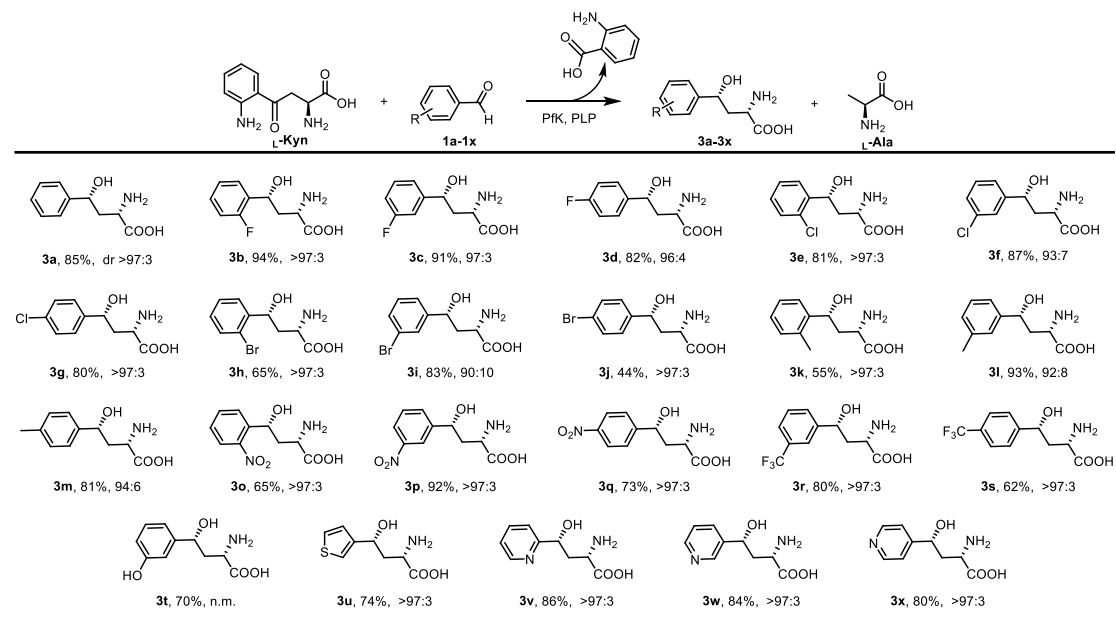

**Figure S5.** Conversion and diastereoisomeric ratio (d.r.) of **3a-3x** from PfK reaction. Reaction details were indicated in the method section.

## X-ray crystallographic analyses of **2c**

Colorless needle crystals of **2c** were obtained by recrystallization from methanol. The crystal data was collected on a Bruker D8 VENTURE diffractometer by CuK $\alpha$  radiation ( $\lambda = 1.54178$ ). Integration and scaling of intensity data was performed using the SAINT program. Data were corrected for the effects of absorption using SADABS. The structures were solved by direct method and refined with full-matrix least-squares technique using SHELX-2014 software. Non-hydrogen atoms were refined with anisotropic displacement parameters, and hydrogen atoms were placed in calculated positions and refined with a riding model. The crystallographic data have been deposited at the Cambridge Crystallographic Data Center (deposition no. CCDC 2084340), which can be obtained free of charge from the CCDC via [https://www.ccdc.cam.ac.uk/data\\_request/cif](https://www.ccdc.cam.ac.uk/data_request/cif).

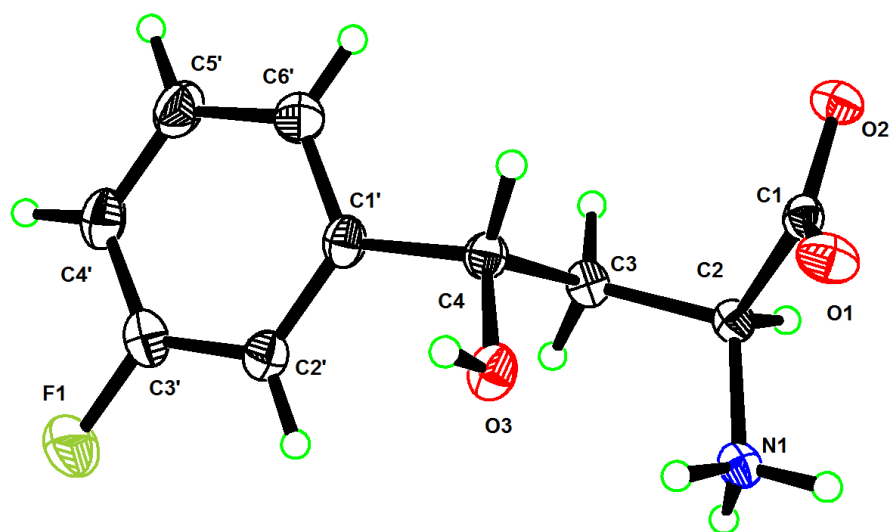

**Figure S6.** Perspective ORTEP drawing for **2c**

## Supplementary Tables

**Table S1.** ApUstD reaction with L-Asp and benzaldehyde.

|   | Enzyme    | L-Asp | 1a    | time | temp  | 2a     | L-Ala  | L-Asp  |
|---|-----------|-------|-------|------|-------|--------|--------|--------|
| 1 | 0.3 mg/ml | 4 mM  | 5 mM  | 24 h | 25 °C | 49.1 % | 30.3 % | 20.6 % |
| 2 | 0.3 mg/ml | 4 mM  | 10 mM | 24 h | 25 °C | 75.9 % | 24.1 % | <0.1 % |
| 3 | 0.3 mg/ml | 4 mM  | 20 mM | 24 h | 25 °C | 84.4 % | 12.2 % | 3.4 %  |
| 4 | 0.3 mg/ml | 4 mM  | 40 mM | 24 h | 25 °C | 84.9 % | 6.1 %  | 9.0 %  |
| 5 | 0.3 mg/ml | 8 mM  | 40 mM | 24 h | 25 °C | 76.9 % | 6.7 %  | 16.4 % |

1 ml reaction containing both substrates, 1mM dithiothreitol, 100  $\mu$ M PLP and 0.4 mg/ml ApUstD in 50 mM phosphate buffer, at pH 7.4 were run at 25 °C. Substrate concentration was indicated in different entries. Relative content of different compounds were determined based on the integrals from  $^1\text{H}$  NMR.

**Table S2.** X-ray crystallographic data for **2c**

|                                                |                                                               |
|------------------------------------------------|---------------------------------------------------------------|
| Identification code                            | cu_2021524_0m                                                 |
| Empirical formula                              | $\text{C}_{10}\text{H}_{12}\text{FNO}_3$                      |
| Formula weight                                 | 213.21                                                        |
| Temperature/K                                  | 170.0                                                         |
| Crystal system                                 | monoclinic                                                    |
| Space group                                    | $P2_1$                                                        |
| a/Å                                            | 5.93840(10)                                                   |
| b/Å                                            | 5.30530(10)                                                   |
| c/Å                                            | 15.9518(4)                                                    |
| $\alpha/^\circ$                                | 90                                                            |
| $\beta/^\circ$                                 | 93.2890(10)                                                   |
| $\gamma/^\circ$                                | 90                                                            |
| Volume/Å <sup>3</sup>                          | 501.734(18)                                                   |
| Z                                              | 2                                                             |
| $\rho_{\text{calc}}/\text{g/cm}^3$             | 1.411                                                         |
| $\mu/\text{mm}^{-1}$                           | 0.993                                                         |
| F(000)                                         | 224.0                                                         |
| Crystal size/mm <sup>3</sup>                   | 0.15 × 0.08 × 0.05                                            |
| Radiation                                      | $\text{CuK}\alpha$ ( $\lambda = 1.54178$ )                    |
| 2 $\theta$ range for data collection/ $^\circ$ | 5.55 to 127.37                                                |
| Index ranges                                   | $-6 \leq h \leq 6, -6 \leq k \leq 6, -18 \leq l \leq 18$      |
| Reflections collected                          | 5180                                                          |
| Independent reflections                        | 1596 [ $R_{\text{int}} = 0.0275, R_{\text{sigma}} = 0.0272$ ] |
| Data/restraints/parameters                     | 1596/1/149                                                    |
| Goodness-of-fit on $F^2$                       | 1.095                                                         |
| Final R indexes [ $I \geq 2\sigma(I)$ ]        | $R_1 = 0.0260, wR_2 = 0.0656$                                 |
| Final R indexes [all data]                     | $R_1 = 0.0268, wR_2 = 0.0676$                                 |
| Largest diff. peak/hole / e Å <sup>-3</sup>    | 0.15/-0.13                                                    |
| Flack parameter                                | 0.13(8)                                                       |

**Table S3.** Kinetic parameters of ApUstD with different substrates.

| Substrate                       | $k_{\text{cat}}$ ( $\text{min}^{-1}$ ) | $K_{\text{M}}$ ( $\mu\text{M}$ ) | $k_{\text{cat}}/K_{\text{M}}$ ( $\text{M}^{-1}\text{min}^{-1}$ ) |
|---------------------------------|----------------------------------------|----------------------------------|------------------------------------------------------------------|
| 3-F ( <b>1c</b> )               | $5.0 \pm 0.1$                          | $3400 \pm 200$                   | 1400                                                             |
| 2-Br ( <b>1h</b> )              | $3.5 \pm 0.1$                          | $1700 \pm 200$                   | 2000                                                             |
| 4-NO <sub>2</sub> ( <b>1q</b> ) | $6.9 \pm 0.3$                          | $400 \pm 40$                     | 17000                                                            |

200  $\mu\text{l}$  reaction containing 12 mM L-aspartic acid, 100  $\mu\text{M}$  PLP, 0.3 mg/ml ApUstD and varied aldehyde concentration in 50 mM phosphate buffer at pH 7.4 were run at 25 °C. 40  $\mu\text{l}$  of reaction mixture were quenched by 20  $\mu\text{l}$  of 1M HCl after 1, 2, 3, 4, 5 minutes respectively. The product formation was monitored by HPLC-UV.

## Supplementary Methods

### General

All enzyme-encoding pET-28a(+) based expression plasmids were purchased from GenScript and expression strain *E. coli* BL21 (DE3) were purchased from Sangon Biotech. Proteins were analyzed by sodium dodecyl sulfate polyacrylamide gel electrophoresis (SDS-PAGE) under denaturing conditions. The gels were stained with Coomassie brilliant blue.

The crystal data was collected on a Bruker D8 VENTURE diffractometer. Semi-Preparative HPLC was performed on a Waters 1525 instrument with a Waters 2489 UV detector using a DAICEL CHIRALPAK IF column (S-5  $\mu$ m, 250  $\times$  10 mm) and a Water SunFire column (S-5  $\mu$ m, 100  $\times$  19 mm). HRESIMS spectra were recorded on an Angilent G6520 Q-ToF mass detector. NMR spectra were recorded using the Bruker AVANCE III 400, 500 and 600 MHz instrument. Standard abbreviations indicating multiplicity were used as follows: s (singlet), d (doublet), t (triplet), and m (multiplet). Chemical shifts were reported in ppm ( $\delta$ ), coupling constants ( $J$ ) in hertz. Econosep C18 60A (50  $\mu$ m, DIKMA, China) was used for column chromatography (CC).

Antibiotics, isopropyl  $\beta$ -D-thiogalactoside (IPTG) and dithiothreitol (DTT) were purchased from Sangon Biotech. L-Aspartic acid was purchased from RHAWN. Aldehyde substrates were purchased from J & K SCIENTIFIC LTD. and bidepharmarmatech. PLP and L-kynurenine were from J & K. Deuterated solvents were purchased from J & K SCIENTIFIC LTD. High pressure cell disrupter and Ni-NTA unionrose 6FF agarose were purchased from Union Biotech.

### Protein expression and purification

*E. coli* BL21 (DE3) cells were transformed with pET-28a(+) expression plasmids by heat shock. Transformed cells were first cultivated on solid medium (LB-AGAR plates with 50  $\mu$ g/ml kanamycin) and then in liquid medium (LB with 50  $\mu$ g/ml kanamycin). After incubation at 37°C overnight, 15 ml of pre-culture was used to inoculate fresh Terrific Broth (TB) medium (1L) with kanamycin (50  $\mu$ g/ml). The cells were grown in 3L shaking flask at 37 °C (170 rpm) until OD600 reached 1.0. The culture was cooled to 18 °C and supplemented with 100  $\mu$ M isopropyl  $\beta$ -D-thiogalactoside (IPTG). This culture was incubated at 18 °C for 20 hours. Cells were harvested by centrifugation at 13000 g for 15 minutes and stored at -20 °C.

For purification of ApUstD, cell pellets (10 g) were suspended in 50 ml lysis buffer (50 mM sodium phosphate, 300 mM NaCl, pH 8.0). Cells were disrupted by high pressure

cell disrupter for 3 times. Lysates were centrifuged at 42000 g for 15 min at 4 °C. The cleared lysate was loaded onto a Ni-NTA unionrose 6FF agarose column. The agarose beads were washed with 150 ml lysis buffer containing 100 mM, 150 mM and 200 mM imidazole respectively. The protein was eluted in a lysis buffer solution containing 500 mM imidazole. Protein containing fractions were collected and dialyzed against dialysis buffer (50 mM sodium phosphate, 50 mM NaCl, 1 mM dithiothreitol, 100 µM PLP, pH 7.4). Protein was used directly after dialysis (yield, 2.3 mg/L).

For purification of PfK, cell pellets (10 g) were suspended in 50 ml lysis buffer (50 mM sodium phosphate, 300 mM NaCl, pH 8.0). Cells were disrupted by high pressure cell disrupter for 3 times. Lysates were centrifuged at 42000 g for 20 min at 4 °C. The cleared lysate was loaded onto a Ni NTA unionrose 6FF agarose column. The agarose beads were washed with 100 ml lysis buffer containing 10 mM and 20 mM imidazole respectively. The protein was eluted in a lysis buffer solution containing 250 mM imidazole. Protein containing fractions were collected and dialyzed against dialysis buffer (50 mM sodium phosphate, 50 mM NaCl, 100 µM PLP, pH 7.4), aliquoted and stored at -80 °C.

Protein sequence:

#### ApUstD

MGSSHHHHHHSSGLVPGSHMKSVANSSSLHDVDKDSVPLSSGTNGTTQAETPLDNVID  
VESVRSHPVLEGETAAFNNASGTVVLKEAIESTSKFMFSFPFPPGVDAKSMEAITA  
YTGNKGKVATFINALPDEITFGQSTTCLFRLGLSLKPMLNSDCEIVCSTLCHEAAA  
SAWIHLSDRLGITIKWWSPTTTPNSPDDPVLTTDSLKPLLSPKTRLVTCNHVSNVVG  
TIHPIREIADVHAIPGCMLIVDGVACVPHRPVDVKELDVDFYCFSWYKLFGPHMGT  
LYASRKAQDRYMTSINHFLSSSSLDGKLALGMPSFELQLMCSPIVSYLQDIVGWRD  
IVRQETVLVKILLQYLLSKPGVYRVFGRNSDPSQRVSIIVTFEVVGRSSGDVAMRVN  
TRNRFRTSGICLAPRPTWDVLKPVSAAGLIRVSFVHYNTVEEVREFCNELDEIVTQ  
DT

#### PfK

MGSSHHHHHHSSGLVPGSHMGTTTRNDCLALDAQDSLAPLRQQFALPEGVIYLDGNSL  
GARPVAALARAQAVIAEEWGNGLIRSWNSAGWRDLSERLGNRLATLIGARDGEVVVT  
DTTSINLFKVLSAALRVQATRSPERRVIVTETS NFPTDLYIAEGLADMLQQGYTLRL  
VDSPEELPQAIDQDTAVVMLTHVNYKTGYMHDMQALTALSHECGALAIWDLAHSAGA  
VPVDLHQAGADYAIGCTYKYLNNGPGSQAFVWVSPQLCDLVPQPLSGWFGHSRQFAM  
EPRYEPSNGIARYLCGTQPITSLAMVECGLDVFAQTDMASLRRKSLALTDLFIELVE  
QRCAAHETLTVTPREHAKRGSHVSFEHPEGYAVIQALIDRGVIGDYREPRIMRFGFT  
PLYTTTFTEVWDAVQILGEILDRKTWAQAQFQVRHSVT

## Time dependent Progress of ApUstD reaction

Reaction containing 12 mM L-aspartic acid, 80 mM benzaldehyde (**1a**), 100  $\mu$ M PLP and 0.3 mg/ml ApUstD in 50 mM phosphate buffer, at pH 7.4 were run at 25 °C. 1 ml reaction mixture was lyophilized at different time point (12h, 24h, 48h, 72h, 96h). After lyophilization, the mixture was dissolved in 600  $\mu$ l D<sub>2</sub>O and submitted to <sup>1</sup>H NMR measurement. Relative content of different compounds was calculated based on integrals of key <sup>1</sup>H NMR resonances and shown in Figure 2b.

## Determination of conversion and diastereoisomeric ratio (d.r.)

Products of **2a-2f**, **2h**, **2i**, **2r**, **2s**, **2u-2aa** and **2ad**: 1 ml reactions containing 0.4 mg ApUstD, 12 mM L-Aspartic acid, 80 mM aldehyde, 1 mM DTT, 100  $\mu$ M PLP and 50 mM sodium phosphate, 50 mM NaCl, at pH 7.4 were run at 25 °C. After 72 hours, the reaction mixtures were centrifugated and lyophilized. After lyophilization, the mixtures were dissolved in 600  $\mu$ l of D<sub>2</sub>O. <sup>1</sup>H NMR were recorded. Conversion efficiency (% of consumed amino acid) and ratio of different products were determined by integration of characteristic <sup>1</sup>H NMR resonances from different compounds.

Products of **2g**, **2j**, **2o-2q** and **2t**: 1 ml reactions containing 0.4 mg ApUstD, 12 mM L-Aspartic acid, 80 mM aldehyde, 4% DMSO (v/v), 1 mM DTT, 100  $\mu$ M PLP and 50 mM sodium phosphate, 50 mM NaCl, at pH 7.4 were run at 25 °C. After 72 hours, the reaction mixtures were centrifugated and lyophilized. After lyophilization, the mixtures were dissolved in 600  $\mu$ l of D<sub>2</sub>O. <sup>1</sup>H NMR were recorded. Conversion efficiency (% of consumed amino acid) and ratio of different products were determined by integration of characteristic <sup>1</sup>H NMR resonances from different compounds.

Products of **2k-2n**, **2ab** and **2ac**: 1 ml reactions containing 0.4 mg ApUstD, 12 mM L-Aspartic acid, 16 mM aldehyde, 2% DMSO (v/v), 1 mM DTT, 100  $\mu$ M PLP and 50 mM sodium phosphate, 50 mM NaCl, at pH 7.4 were run at 25 °C. After 72 hours, the reaction mixtures were centrifugated and lyophilized. After lyophilization, the mixtures were dissolved in 600  $\mu$ l of D<sub>2</sub>O. <sup>1</sup>H NMR were recorded. Conversion efficiency (% of consumed amino acid) and ratio of different products were determined by integration of characteristic <sup>1</sup>H NMR resonances from different compounds.

Products of **3a-3x**: 1 ml reactions containing 0.5 mg PfK, 24 mM L-kynurenine, 180 mM aldehyde, 100  $\mu$ M PLP and 50 mM sodium phosphate, 50 mM NaCl, at pH 7.4 were run at 25 °C. After 12 hours, the reaction mixtures were centrifugated and lyophilized. After lyophilization, the mixtures were dissolved in 600  $\mu$ l of D<sub>2</sub>O. <sup>1</sup>H NMR were recorded. Conversion efficiency (% of consumed L-kynurenine) and ratio of different products were determined by integration of characteristic <sup>1</sup>H NMR resonances from different compounds.

The diastereoisomeric ratio of ApUstD and PfK reactions were determined by

integration of  $^1\text{H}$  NMR resonances of  $\gamma\text{-H}$  of the products and their diastereo-isomers (Figure S58-S85).

## Determination of Kinetic Parameters

200  $\mu\text{l}$  reaction containing 12 mM L-aspartic acid, 100  $\mu\text{M}$  PLP, 0.3 mg/ml ApUstD and varied aldehyde concentration in 50 mM phosphate buffer at pH 7.4 were run at 25  $^\circ\text{C}$ . 40  $\mu\text{l}$  of reaction mixture were quenched by 20  $\mu\text{l}$  of 1M HCl after 1, 2, 3, 4, 5 minutes respectively. The product formation was monitored by HPLC-UV. Product concentration were calculated based on the respective calibration curve. Velocities were calculated and plotted against substrate concentrations. The velocity was fitted to equation of  $v = v_{\text{max}} * [\text{s}] / (K_{\text{M}} + [\text{s}])$  and values of  $k_{\text{cat}}$ ,  $K_{\text{M}}$  and  $k_{\text{cat}}/K_{\text{M}}$  were obtained thereafter.

## Semi-preparative reaction and characterization of Compounds

For the structural characterization of products **2a-2x** and **2ab**, 15 ml reactions were incubated for 72 h, lyophilized. Products of **2a-2x** were loaded on C18 chromatography eluted with methanol in water in a stepwise manner (0%, 20%, 40%, 60%, 95%). The purification was monitored with HPLC. Fractions containing products were collected and the solvent was removed by rotavapor to yield products.

Product of **2ab** was purified by semi-preparative HPLC using a DAICEL CHIRALPAK IF HPLC column (methanol: 20 mM ammonium bicarbonate in water = 1:99, 4 ml/min). The purified compounds were dissolved in methanol to detect the HRESIMS, and dissolved in NaOD/D<sub>2</sub>O analyzed by  $^1\text{H}$  NMR and  $^{13}\text{C}$  NMR.

For the structural characterization of products **3a-3x**, 5 ml reactions were incubated for 12 h, lyophilized. Products of **3a-3g**, **3o-3q** and **3u** were purified by semi-preparative HPLC using a Water sunfire column eluted with MeOH/H<sub>2</sub>O (0-30 min, 5-95%, 10 ml/min). Products of **3h-3m** were purified by semi-preparative HPLC using a Water sunfire column eluted with MeOH/H<sub>2</sub>O (0-30 min, 25-95%, 10 ml/min). Products of **3r** and **3s** were purified by semi-preparative HPLC using a Water sunfire column eluted with MeOH/H<sub>2</sub>O (0-30 min, 40-95%, 10 ml/min). Products of **3t** and **3v-3x** were purified by semi-preparative HPLC using a Water sunfire column eluted with MeOH/H<sub>2</sub>O (0-30 min, 2-50%, 10 ml/min). The solvent was removed by rotavapor to yield products.

All reported chemical shifts was adjusted with reference of D<sub>2</sub>O (4.79). Raw NMR Data of all compounds has been deposited on Zendo.org (DOI: <https://doi.org/10.5281/zenodo.5205646>)



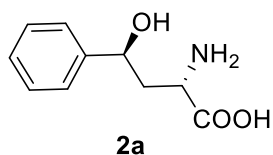

$^1\text{H}$  NMR (400 MHz,  $\text{D}_2\text{O}$ , pD = 7.0)  $\delta$  7.44 – 7.33 (m, 5H), 4.89 (dd,  $J$  = 9.5, 3.7 Hz, 1H), 3.86 (dd,  $J$  = 7.0, 4.2 Hz, 1H), 2.30 (ddd,  $J$  = 14.8, 9.5, 4.2 Hz, 1H), 2.19 (ddd,  $J$  = 14.8, 7.0, 3.7 Hz, 1H) ppm.  $^{13}\text{C}$  NMR (125 MHz, pD = 7.0)  $\delta$  174.3, 143.0, 128.9, 128.9, 128.1, 125.8, 125.8, 70.9, 52.9, 37.9 ppm. HRMS (ESI) (m/z) for  $[\text{M}+\text{H}]^+$   $\text{C}_{10}\text{H}_{14}\text{NO}_3$  calculated 196.0968, observed 196.0968.

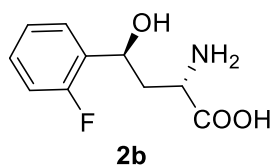

$^1\text{H}$  NMR (400 MHz,  $\text{D}_2\text{O}$ , pD = 8.0)  $\delta$  7.46 (t,  $J$  = 7.6 Hz, 1H), 7.33 (q,  $J$  = 6.8 Hz, 1H), 7.22 (m, 1H), 7.11 (m, 1H), 5.12 (dd,  $J$  = 9.1, 4.6 Hz, 1H), 3.34 (dd,  $J$  = 8.6, 4.8 Hz, 1H), 2.16 (ddd,  $J$  = 14.0, 9.1, 4.8 Hz, 1H), 1.87 (ddd,  $J$  = 14.0, 8.6, 4.6 Hz, 1H) ppm.  $^{13}\text{C}$  NMR (125 MHz,  $\text{D}_2\text{O}$ , pD = 8.0)  $\delta$  182.8, 159.7 (d,  $^1J_{\text{C-F}}$  = 244.3 Hz), 130.2 (d,  $^2J_{\text{C-F}}$  = 13.2 Hz), 127.5 (d,  $^3J_{\text{C-F}}$  = 8.5 Hz), 127.5 (d,  $^3J_{\text{C-F}}$  = 4.4 Hz), 124.6 (d,  $^4J_{\text{C-F}}$  = 3.3 Hz), 115.6 (d,  $^2J_{\text{C-F}}$  = 21.7 Hz), 65.4 (d,  $^3J_{\text{C-F}}$  = 2.6 Hz), 53.5, 41.7 ppm.  $^{19}\text{F}$  NMR (471 MHz,  $\text{D}_2\text{O}$ , pD = 8.0)  $\delta$  -119.7 ppm. HRMS (ESI) (m/z) for  $[\text{M}+\text{H}]^+$   $\text{C}_{10}\text{H}_{13}\text{FNO}_3$  calculated 214.0874, observed 214.0874.

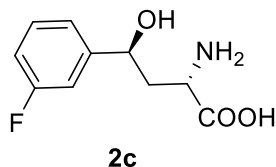

$^1\text{H}$  NMR (400 MHz,  $\text{D}_2\text{O}$ , pD = 8.0)  $\delta$  7.37 (td,  $J$  = 8.0, 6.0 Hz, 1H), 7.15 (m, 2H), 7.03 (m, 1H), 4.81 (m, 1H, partially overlapped with solvent), 3.31 (m, 1H, partially overlapped with solvent), 2.08 (ddd,  $J$  = 14.0, 9.1, 5.0 Hz, 1H), 1.80 (ddd,  $J$  = 14.0, 8.5, 4.6 Hz, 1H) ppm.  $^{13}\text{C}$  NMR (100 MHz,  $\text{D}_2\text{O}$ , pD = 8.0)  $\delta$  182.8, 162.6 (d,  $^1J_{\text{C-F}}$  = 243.4 Hz), 146.4 (d,  $^3J_{\text{C-F}}$  = 6.8 Hz), 130.3 (d,  $^3J_{\text{C-F}}$  = 8.2 Hz), 121.7 (d,  $^4J_{\text{C-F}}$  = 2.8 Hz), 114.3 (d,  $^2J_{\text{C-F}}$  = 21.1 Hz), 112.7 (d,  $^2J_{\text{C-F}}$  = 21.9 Hz), 70.7, 53.4, 43.0 ppm.  $^{19}\text{F}$  NMR (376 MHz,  $\text{D}_2\text{O}$ , pD = 8.0)  $\delta$  -113.7 ppm. HRMS (ESI) (m/z) for  $[\text{M}+\text{H}]^+$   $\text{C}_{10}\text{H}_{13}\text{FNO}_3$  calculated 214.0874, observed 214.0870.  $[\alpha]_{\text{D}}^{20}$  = -30.0 ( $c$  = 0.10, Methanol).

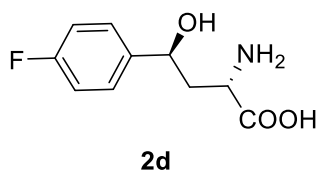

$^1\text{H}$  NMR (400 MHz,  $\text{D}_2\text{O}$ , pD = 8.0)  $\delta$  7.38 (m, 2H), 7.11 (t,  $J$  = 8.0 Hz, 2H), 4.81 (m, 1H, partially overlapped with solvent), 3.38 (m, 1H), 2.14 (ddd,  $J$  = 14.4, 8.7, 5.0 Hz, 1H), 1.89 (m, 1H) ppm.  $^{13}\text{C}$  NMR (100 MHz,  $\text{D}_2\text{O}$ , pD = 8.0)  $\delta$  180.4, 162.0 (d,  $^1J_{\text{C-F}}$  = 243.0 Hz), 139.2 (d,  $^4J_{\text{C-F}}$  = 3.1 Hz), 127.8 (d,  $^3J_{\text{C-F}}$  = 8.3 Hz), 127.8 (d,  $^3J_{\text{C-F}}$  = 8.3 Hz), 115.3 (d,  $^2J_{\text{C-F}}$  = 21.4 Hz), 115.3 (d,  $^1J_{\text{C-F}}$  = 21.4 Hz), 70.5, 53.3, 41.6 ppm.  $^{19}\text{F}$  NMR (471 MHz,  $\text{D}_2\text{O}$ , pD = 8.0)  $\delta$  -115.5 ppm. HRMS (ESI) (m/z) for  $[\text{M}+\text{H}]^+$   $\text{C}_{10}\text{H}_{13}\text{FNO}_3$  calculated 214.0874, observed 214.0873.

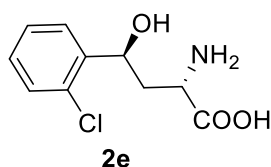

$^1\text{H}$  NMR (400 MHz,  $\text{D}_2\text{O}$ , pD = 8.0)  $\delta$  7.55 (d,  $J$  = 7.7 Hz, 1H), 7.41 (d,  $J$  = 7.7 Hz, 1H), 7.37 (t,  $J$  = 7.7 Hz, 1H), 7.28 (t,  $J$  = 7.7 Hz, 1H), 5.28 (dd,  $J$  = 9.6, 3.6 Hz, 1H), 3.41 (dd,  $J$  = 9.1, 4.2 Hz, 1H), 2.04 (ddd,  $J$  = 14.0, 9.6, 4.2 Hz, 1H), 1.86 (ddd,  $J$  = 14.0, 9.1, 3.6 Hz, 1H) ppm.  $^{13}\text{C}$  NMR (100 MHz,  $\text{D}_2\text{O}$ , pD = 8.0)  $\delta$  182.8, 140.8, 131.5, 129.5, 128.9, 127.4, 126.9, 67.5, 53.5, 41.5 ppm. HRMS (ESI) (m/z) for  $[\text{M}+\text{H}]^+$   $\text{C}_{10}\text{H}_{13}\text{ClNO}_3$  calculated 230.0578, observed 230.0574.

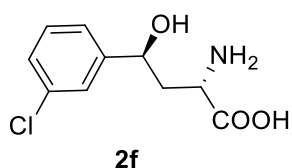

$^1\text{H}$  NMR (400 MHz,  $\text{D}_2\text{O}$ , pD = 8.0)  $\delta$  7.41 (s, 1H), 7.33 (m, 3H), 4.79 (m, 1H, partially overlapped with solvent), 3.32 (m, 1H), 2.07 (m, 1H), 1.81 (m, 1H) ppm.  $^{13}\text{C}$  NMR (100 MHz,  $\text{D}_2\text{O}$ , pD = 8.0)  $\delta$  182.8, 145.9, 133.7, 130.1, 127.6, 125.9, 124.3, 70.6, 53.3, 43.0 ppm. HRMS (ESI) (m/z) for  $[\text{M}+\text{H}]^+$   $\text{C}_{10}\text{H}_{13}\text{ClNO}_3$  calculated 230.0578, observed 230.0580.

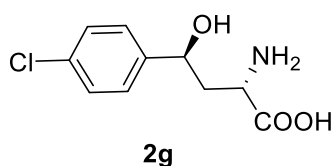

$^1\text{H}$  NMR (400 MHz,  $\text{D}_2\text{O}$ , pD = 8.0)  $\delta$  7.39 (d,  $J$  = 8.4 Hz, 2H), 7.34 (d,  $J$  = 8.4 Hz, 2H), 4.81 (m, 1H, partially overlapped with solvent), 3.36 (dd,  $J$  = 8.1, 5.0 Hz, 1H), 2.11 (ddd,  $J$  = 14.2, 9.1, 5.0 Hz, 1H), 1.84 (ddd,  $J$  = 14.2, 8.1, 4.5 Hz, 1H) ppm.  $^{13}\text{C}$  NMR (100 MHz,  $\text{D}_2\text{O}$ , pD = 8.0)  $\delta$  181.6, 142.2, 132.7, 128.5, 128.5, 127.5, 127.5, 70.5, 53.3, 42.3 ppm. HRMS (ESI) (m/z) for  $[\text{M}+\text{H}]^+$   $\text{C}_{10}\text{H}_{13}\text{ClNO}_3$  calculated 230.0578, observed 230.0575.

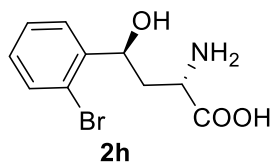

$^1\text{H}$  NMR (400 MHz,  $\text{D}_2\text{O}$ ,  $\text{pD} = 8.0$ )  $\delta$  7.60 (d,  $J = 8.0$  Hz, 1H), 7.54 (d,  $J = 8.0$  Hz, 1H), 7.41 (t,  $J = 8.0$  Hz, 1H), 7.21 (t,  $J = 8.0$  Hz, 1H), 5.23 (dd,  $J = 10.3, 2.4$  Hz, 1H), 3.43 (dd,  $J = 9.2, 4.2$  Hz, 1H), 2.00 (m, 1H), 1.87 (m, 1H) ppm.  $^{13}\text{C}$  NMR (100 MHz,  $\text{D}_2\text{O}$ ,  $\text{pD} = 8.0$ )  $\delta$  182.8, 142.4, 132.7, 129.2, 128.0, 127.1, 121.5, 69.8, 53.5, 41.6 ppm. HRMS (ESI) ( $m/z$ ) for  $[\text{M}+\text{H}]^+$   $\text{C}_{10}\text{H}_{13}\text{BrNO}_3$  calculated 274.0073, observed 274.0066.

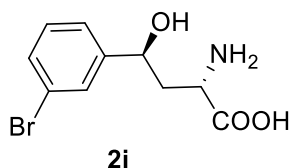

$^1\text{H}$  NMR (400 MHz,  $\text{D}_2\text{O}$ ,  $\text{pD} = 8.0$ )  $\delta$  7.56 (s, 1H), 7.46 (d,  $J = 7.6$  Hz, 1H), 7.33 (d,  $J = 7.6$  Hz, 1H), 7.28 (t,  $J = 7.6$  Hz, 1H), 4.76 (m, 1H, partially overlapped with solvent), 3.32 (m, 1H, partially overlapped with solvent), 2.08 (ddd,  $J = 14.0, 9.2, 4.9$  Hz, 1H), 1.78 (ddd,  $J = 14.0, 8.5, 4.5$  Hz, 1H) ppm.  $^{13}\text{C}$  NMR (100 MHz,  $\text{D}_2\text{O}$ ,  $\text{pD} = 8.0$ )  $\delta$  182.6, 146.2, 130.6, 130.4, 128.8, 124.8, 122.0, 70.6, 53.3, 43.0 ppm. HRMS (ESI) ( $m/z$ ) for  $[\text{M}+\text{H}]^+$   $\text{C}_{10}\text{H}_{13}\text{BrNO}_3$  calculated 274.0073, observed 274.0072.

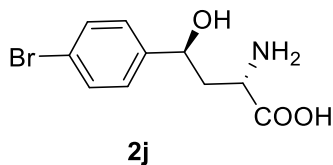

$^1\text{H}$  NMR (400 MHz,  $\text{D}_2\text{O}$ ,  $\text{pD} = 8.0$ )  $\delta$  7.54 (d,  $J = 8.4$  Hz, 2H), 7.29 (d,  $J = 8.4$  Hz, 2H), 4.77 (m, 1H, partially overlapped with solvent), 3.31 (m, 1H), 2.09 (ddd,  $J = 14.0, 9.1, 5.0$  Hz, 1H), 1.80 (ddd,  $J = 14.0, 8.3, 4.7$  Hz, 1H) ppm.  $^{13}\text{C}$  NMR (100 MHz,  $\text{D}_2\text{O}$ ,  $\text{pD} = 8.0$ )  $\delta$  182.4, 142.8, 131.5, 131.5, 127.9, 127.9, 120.8, 70.6, 53.4, 42.8 ppm. HRMS (ESI) ( $m/z$ ) for  $[\text{M}+\text{H}]^+$   $\text{C}_{10}\text{H}_{13}\text{BrNO}_3$  calculated 274.0073, observed 274.0072.

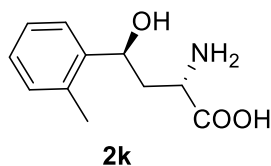

$^1\text{H}$  NMR (400 MHz,  $\text{D}_2\text{O}$ ,  $\text{pD} = 8.0$ )  $\delta$  7.45 (d,  $J = 7.6$  Hz, 1H), 7.26 (m, 1H), 7.21 (m, 2H), 5.10 (dd,  $J = 9.5, 3.9$  Hz, 1H), 3.36 (dd,  $J = 8.7, 4.5$  Hz, 1H), 2.30 (s, 3H), 2.05 (ddd,  $J = 14.2, 9.5, 4.5$  Hz, 1H), 1.76 (ddd,  $J = 14.2, 8.7, 3.9$  Hz, 1H) ppm.  $^{13}\text{C}$  NMR (125 MHz,  $\text{D}_2\text{O}$ ,  $\text{pD} = 8.0$ )  $\delta$  184.4, 143.3, 136.6, 131.9, 129.0, 127.9, 126.6, 68.7, 55.1, 43.6, 19.5 ppm. HRMS (ESI) ( $m/z$ ) for  $[\text{M}+\text{H}]^+$   $\text{C}_{11}\text{H}_{16}\text{NO}_3$  calculated 210.1125, observed 210.1122.

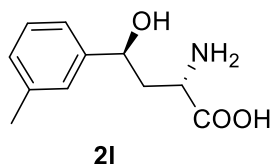

$^1\text{H}$  NMR (400 MHz,  $\text{D}_2\text{O}$ ,  $\text{pD} = 8.0$ )  $\delta$  7.30 (t,  $J = 7.8$  Hz, 1H), 7.23 (s, 1H), 7.17 (t,  $J = 7.8$  Hz, 2H), 4.76 (m, 1H, partially overlapped with solvent), 3.30 (q,  $J = 5.0$  Hz, 1H), 2.31 (s, 3H), 2.10 (ddd,  $J = 14.0, 8.8, 5.0$  Hz, 1H), 1.78 (ddd,  $J = 14.0, 8.8, 5.0$  Hz, 1H) ppm.  $^{13}\text{C}$  NMR (100 MHz,  $\text{D}_2\text{O}$ ,  $\text{pD} = 8.0$ )  $\delta$  182.9, 143.8, 138.8, 128.7, 128.4, 126.6, 123.0, 71.2, 53.5, 43.2, 20.4 ppm. HRMS (ESI) ( $m/z$ ) for  $[\text{M}+\text{H}]^+$   $\text{C}_{11}\text{H}_{16}\text{NO}_3$  calculated 210.1125, observed 210.1124.

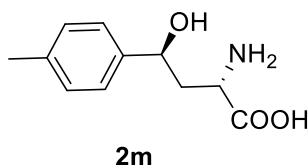

$^1\text{H}$  NMR (400 MHz,  $\text{D}_2\text{O}$ ,  $\text{pD} = 8.0$ )  $\delta$  7.28 (d,  $J = 8.0$  Hz, 2H), 7.23 (d,  $J = 8.0$  Hz, 2H), 4.76 (m, 1H, partially overlapped with solvent), 3.34 (dd,  $J = 8.2, 4.9$  Hz, 1H), 2.29 (s, 3H), 2.12 (ddd,  $J = 14.0, 9.1, 4.9$  Hz, 1H), 1.82 (ddd,  $J = 14.0, 8.2, 4.7$  Hz, 1H) ppm.  $^{13}\text{C}$  NMR (100 MHz,  $\text{D}_2\text{O}$ ,  $\text{pD} = 8.0$ )  $\delta$  182.0, 140.6, 138.0, 129.2, 129.2, 126.0, 126.0, 71.0, 53.4, 42.6, 20.1 ppm. HRMS (ESI) ( $m/z$ ) for  $[\text{M}+\text{H}]^+$   $\text{C}_{11}\text{H}_{16}\text{NO}_3$  calculated 210.1125, observed 210.1119.

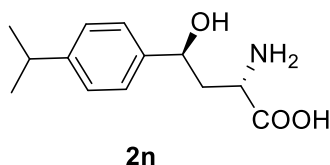

$^1\text{H}$  NMR (400 MHz,  $\text{D}_2\text{O}$ ,  $\text{pD} = 8.0$ )  $\delta$  7.32 (s, 4H), 4.79 (m, 1H, partially overlapped with solvent), 3.30 (dd,  $J = 8.1, 5.1$  Hz, 1H), 2.89 (m, 1H), 2.10 (m, 1H), 1.78 (m, 1H), 1.20 (d,  $J = 7.1$ , 6H) ppm.  $^{13}\text{C}$  NMR (125 MHz,  $\text{D}_2\text{O}$ ,  $\text{pD} = 8.0$ )  $\delta$  183.0, 149.1, 141.4, 126.7, 126.7, 126.2, 126.2, 71.1, 53.5, 43.3, 33.3, 23.2, 23.2 ppm. HRMS (ESI) ( $m/z$ ) for  $[\text{M}+\text{H}]^+$   $\text{C}_{13}\text{H}_{20}\text{NO}_3$  calculated 238.1438, observed 238.1438.

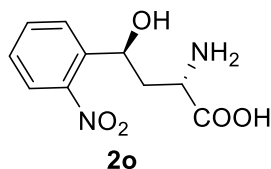

$^1\text{H}$  NMR (400 MHz,  $\text{D}_2\text{O}$ ,  $\text{pD} = 8.0$ )  $\delta$  7.95 (d,  $J = 7.7$  Hz, 1H), 7.79 (d,  $J = 7.7$  Hz, 1H), 7.72 (t,  $J = 7.7$  Hz, 1H), 7.48 (t,  $J = 7.7$  Hz, 1H), 5.40 (dd,  $J = 9.6, 3.1$  Hz, 1H), 3.44 (dd,  $J = 9.6, 4.2$  Hz, 1H), 2.07 (ddd,  $J = 14.0, 9.6, 4.2$  Hz, 1H), 1.90 (ddd,  $J = 14.0, 9.5, 3.1$  Hz, 1H) ppm.  $^{13}\text{C}$  NMR (125 MHz,  $\text{D}_2\text{O}$ ,  $\text{pD} = 8.0$ )  $\delta$  184.4, 148.6, 140.6, 135.5,

129.9, 129.2, 125.9, 67.6, 55.0, 44.0 ppm. HRMS (ESI) (m/z) for  $[M+H]^+$   $C_{10}H_{13}N_2O_5$  calculated 241.0819, observed 241.0812.

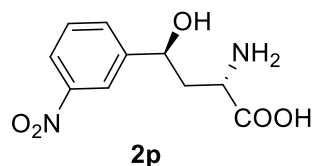

$^1H$  NMR (400 MHz,  $D_2O$ , pD = 8.0)  $\delta$  8.24 (s, 1H), 8.15 (d,  $J$  = 7.9 Hz, 1H), 7.77 (d,  $J$  = 7.9 Hz, 1H), 7.59 (t,  $J$  = 7.9 Hz, 1H), 4.94 (dd,  $J$  = 9.3, 4.4 Hz, 1H), 3.27 (m, 1H, partially overlapped with solvent), 2.12 (ddd,  $J$  = 14.0, 9.3, 4.9 Hz, 1H), 1.86 (ddd,  $J$  = 14.0, 8.5, 4.4 Hz, 1H) ppm.  $^{13}C$  NMR (125 MHz,  $D_2O$ , pD = 8.0)  $\delta$  182.7, 148.0, 145.9, 132.8, 129.8, 122.7, 120.9, 70.4, 53.4, 43.0 ppm. HRMS (ESI) (m/z) for  $[M+H]^+$   $C_{10}H_{13}N_2O_5$  calculated 241.0819, observed 241.0813.

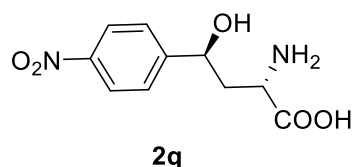

$^1H$  NMR (400 MHz,  $D_2O$ , pD = 8.0)  $\delta$  8.15 (d,  $J$  = 8.5 Hz, 2H), 7.51 (d,  $J$  = 8.5 Hz, 2H), 4.88 (dd,  $J$  = 9.4, 4.4 Hz, 1H), 3.28 (dd,  $J$  = 8.6, 4.8 Hz, 1H), 2.02 (ddd,  $J$  = 14.0, 9.4, 4.8 Hz, 1H), 1.77 (ddd,  $J$  = 14.0, 8.6, 4.4 Hz, 1H) ppm.  $^{13}C$  NMR (125 MHz,  $D_2O$ , pD = 8.0)  $\delta$  184.2, 153.3, 148.4, 128.3, 128.3, 125.3, 125.3, 72.0, 64.0, 44.5 ppm. HRMS (ESI) (m/z) for  $[M+H]^+$   $C_{10}H_{13}N_2O_5$  calculated 241.0819, observed 241.0814.

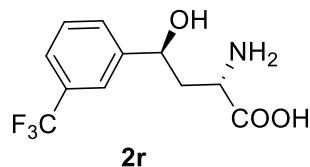

$^1H$  NMR (400 MHz,  $D_2O$ , pD = 8.0)  $\delta$  7.71 (s, 1H), 7.62 (m, 2H), 7.54 (m, 1H), 4.89 (m, 1H), 3.35 (dd,  $J$  = 7.8, 4.8 Hz, 1H), 2.12 (m, 1H), 1.84 (m, 1H) ppm.  $^{13}C$  NMR (125 MHz,  $D_2O$ , pD = 8.0)  $\delta$  182.4, 144.9, 130.1 (q,  $^2J_{C-F}$  = 32.0 Hz), 129.7, 129.3, 124.5 (q,  $^3J_{C-F}$  = 3.9 Hz), 124.2 (q,  $^1J_{C-F}$  = 273.5 Hz), 122.7 (q,  $^3J_{C-F}$  = 3.9 Hz), 70.8, 53.4, 42.9 ppm.  $^{19}F$  NMR (376 MHz,  $D_2O$ , pD = 8.0)  $\delta$  -62.4 ppm. HRMS (ESI) (m/z) for  $[M+H]^+$   $C_{11}H_{13}F_3NO_3$  calculated 264.0842, observed 264.0844.

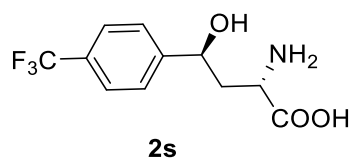

$^1H$  NMR (400 MHz,  $D_2O$ , pD = 7.0)  $\delta$  7.79 (d,  $J$  = 8.1 Hz, 2H), 7.63 (d,  $J$  = 8.1 Hz, 2H), 5.05 (dd,  $J$  = 9.1, 4.1 Hz, 1H), 3.94 (dd,  $J$  = 6.8, 4.3 Hz, 1H), 2.24 (m, 2H) ppm.  $^{13}C$  NMR (125 MHz,  $D_2O$ , pD = 7.0)  $\delta$  174.0, 147.2, 129.3 (q,  $^2J_{C-F}$  = 32.1 Hz), 126.2,

126.2, 125.6 (q,  $^3J_{\text{C-F}} = 3.8$  Hz), 125.6 (q,  $^3J_{\text{C-F}} = 3.8$  Hz), 124.2 (q,  $^1J_{\text{C-F}} = 271.3$  Hz), 70.4, 52.9, 37.7 ppm.  $^{19}\text{F}$  NMR (376 MHz,  $\text{D}_2\text{O}$ , pD = 7.0)  $\delta$  -62.3 ppm. HRMS (ESI) (m/z) for  $[\text{M}+\text{H}]^+$   $\text{C}_{11}\text{H}_{13}\text{F}_3\text{NO}_3$  calculated 264.0842, observed 264.0840.

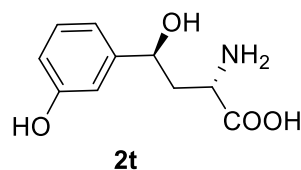

$^1\text{H}$  NMR (500 MHz,  $\text{D}_2\text{O}$ , pD = 7.0)  $\delta$  7.28 (m, 1H), 6.94 (d,  $J = 7.6$  Hz, 1H), 6.89 (s, 1H), 6.82 (d,  $J = 8.1$  Hz, 1H), 4.83 (m, 1H, partially overlapped with solvent), 3.84 (d,  $J = 6.2$  Hz, 1H), 2.23 (m, 2H) ppm.  $^{13}\text{C}$  NMR (125 MHz,  $\text{D}_2\text{O}$ , pD = 7.0)  $\delta$  174.3, 155.8, 145.1, 130.3, 117.7, 114.9, 112.6, 70.7, 52.9, 37.9 ppm. HRMS (ESI) (m/z) for  $[\text{M}+\text{H}]^+$   $\text{C}_{10}\text{H}_{14}\text{NO}_4$  calculated 212.0917, observed 212.0915.

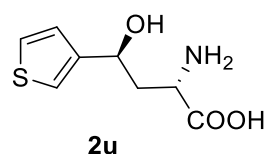

$^1\text{H}$  NMR (400 MHz,  $\text{D}_2\text{O}$ , pD = 7.0)  $\delta$  7.45 (m, 1H), 7.36 (s, 1H), 7.14 (d,  $J = 5.3$  Hz, 1H), 4.99 (dd,  $J = 9.2, 4.1$  Hz, 1H), 3.85 (m, 1H), 2.30 (m, 2H) ppm.  $^{13}\text{C}$  NMR (125 MHz,  $\text{D}_2\text{O}$ , pD = 7.0)  $\delta$  174.2, 144.1, 127.1, 125.5, 121.8, 67.1, 52.8, 37.2 ppm. HRMS (ESI) (m/z) for  $[\text{M}+\text{H}]^+$   $\text{C}_8\text{H}_{12}\text{NO}_3\text{S}$  calculated 202.0532, observed 202.0530.

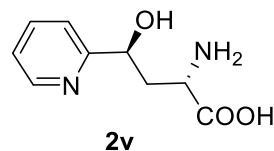

$^1\text{H}$  NMR (600 MHz,  $\text{D}_2\text{O}$ , pD = 7.0)  $\delta$  8.44 (m, 1H), 7.86 (td,  $J = 7.7, 1.8$  Hz, 1H), 7.51 (d,  $J = 7.8$  Hz, 1H), 7.34 (m, 1H), 4.95 (t,  $J = 6.5$  Hz, 1H), 3.88 (t,  $J = 6.0$  Hz, 1H), 2.29 (m, 2H) ppm.  $^{13}\text{C}$  NMR (125 MHz,  $\text{D}_2\text{O}$ , pD = 7.0)  $\delta$  174.1, 160.5, 148.3, 138.4, 123.5, 120.9, 71.2, 52.7, 36.5 ppm. HRMS (ESI) (m/z) for  $[\text{M}+\text{H}]^+$   $\text{C}_9\text{H}_{13}\text{N}_2\text{O}_3$  calculated 197.0921, observed 197.0919.

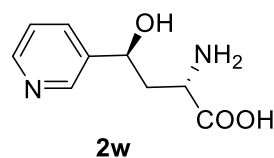

$^1\text{H}$  NMR (400 MHz,  $\text{D}_2\text{O}$ , pD = 7.0)  $\delta$  8.51 (s, 1H), 8.44 (d,  $J = 5.0$ , 1H), 7.86 (d,  $J = 8.2$  Hz, 1H), 7.44 (dd,  $J = 8.2, 5.0$  Hz, 1H), 4.95 (dd,  $J = 9.3, 3.6$  Hz, 1H), 3.89 (dd,  $J = 6.9, 4.2$  Hz, 1H), 2.26 (m, 2H) ppm.  $^{13}\text{C}$  NMR (125 MHz,  $\text{D}_2\text{O}$ , pD = 7.0)  $\delta$  174.0, 148.2, 146.4, 139.0, 135.0, 124.4, 68.7, 52.8, 37.5 ppm. HRMS (ESI) (m/z) for  $[\text{M}+\text{H}]^+$   $\text{C}_9\text{H}_{13}\text{N}_2\text{O}_3$  calculated 197.0921, observed 197.0924.

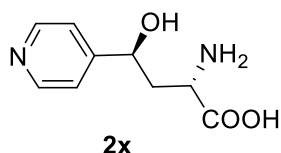

$^1\text{H}$  NMR (400 MHz,  $\text{D}_2\text{O}$ , pD = 7.0)  $\delta$  8.49 (d,  $J$  = 5.5, 2H), 7.45 (d,  $J$  = 5.5, 2H), 4.94 (t,  $J$  = 6.6 Hz, 1H), 3.89 (t,  $J$  = 5.7 Hz, 1H), 2.24 (m, 2H) ppm.  $^{13}\text{C}$  NMR (125 MHz,  $\text{D}_2\text{O}$ , pD = 7.0) 174.0, 153.6, 148.8, 148.8, 121.2, 121.2, 69.5, 52.8, 37.3 ppm. HRMS (ESI) (m/z) for  $[\text{M}+\text{H}]^+$   $\text{C}_9\text{H}_{13}\text{N}_2\text{O}_3$  calculated 197.0921, observed 197.0918.

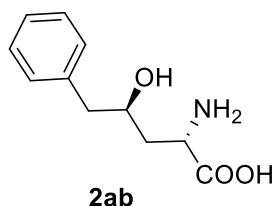

$^1\text{H}$  NMR (400 MHz,  $\text{D}_2\text{O}$ , pD = 7.0)  $\delta$  7.35 (m, 2H), 7.27 (m, 3H), 4.11 (m, 1H), 3.70 (m, 1H), 2.88 (dd,  $J$  = 13.8, 4.8 Hz, 1H), 2.72 (m, 1H), 2.11 (d,  $J$  = 14.9 Hz, 1H), 1.76 (m, 1H) ppm.  $^{13}\text{C}$  NMR (150 MHz,  $\text{D}_2\text{O}$ , pD = 7.0)  $\delta$  196.2, 138.1, 129.5, 129.5, 128.6, 128.6, 126.6, 71.5, 54.3, 43.2, 37.2 ppm. HRMS (ESI) (m/z) for  $[\text{M}+\text{H}]^+$   $\text{C}_{11}\text{H}_{16}\text{NO}_3$  calculated 210.1125, observed 210.1128.

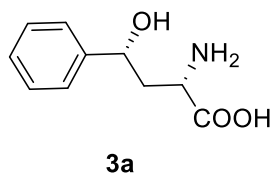

$^1\text{H}$  NMR (400 MHz,  $\text{D}_2\text{O}$ , pD = 8.0)  $\delta$  7.42 (m, 5H), 4.88 (dd,  $J$  = 8.4, 5.3 Hz, 1H), 3.48 (dd,  $J$  = 8.4, 5.3 Hz, 1H), 2.19 (dt,  $J$  = 14.4, 5.3 Hz, 1H), 2.03 (dt,  $J$  = 14.4, 8.4 Hz, 1H) ppm.  $^{13}\text{C}$  NMR (100 MHz,  $\text{D}_2\text{O}$ , pD = 8.0)  $\delta$  178.9, 143.0, 128.8, 128.8, 128.0, 126.0, 126.0, 72.2, 54.0, 40.9 ppm. HRMS (ESI) (m/z) for  $[\text{M}+\text{H}]^+$   $\text{C}_{10}\text{H}_{14}\text{NO}_3$  calculated 196.0968, observed 196.0965.

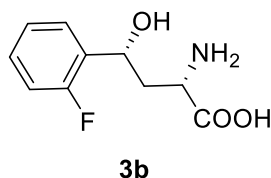

$^1\text{H}$  NMR (400 MHz,  $\text{D}_2\text{O}$ , pD = 8.0)  $\delta$  7.47 (m, 1H), 7.34 (m, 1H), 7.23 (t,  $J$  = 7.5 Hz, 1H), 7.13 (m, 1H), 5.15 (dd,  $J$  = 8.0, 5.9 Hz, 1H), 3.39 (m, 1H), 2.20 (m, 1H), 2.04 (dt,  $J$  = 14.9, 8.0 Hz, 1H) ppm.  $^{13}\text{C}$  NMR (125 MHz,  $\text{D}_2\text{O}$ , pD = 8.0)  $\delta$  180.2, 159.8 (d,  $^1J_{\text{C-F}}$  = 244.5 Hz), 129.8 (d,  $^3J_{\text{C-F}}$  = 8.1 Hz), 129.7 (d,  $^2J_{\text{C-F}}$  = 12.6 Hz), 127.6 (d,  $^3J_{\text{C-F}}$  = 4.6 Hz), 124.6 (d,  $^4J_{\text{C-F}}$  = 3.5 Hz), 115.6 (d,  $^2J_{\text{C-F}}$  = 21.8 Hz), 66.4 (d,  $^3J_{\text{C-F}}$  = 2.9 Hz), 54.0, 40.6 ppm.  $^{19}\text{F}$  NMR (376 MHz,  $\text{D}_2\text{O}$ , pD = 8.0)  $\delta$  -119.6 ppm. HRMS (ESI) (m/z) for  $[\text{M}+\text{H}]^+$   $\text{C}_{10}\text{H}_{13}\text{FNO}_3$  calculated 214.0874, observed 214.0872.

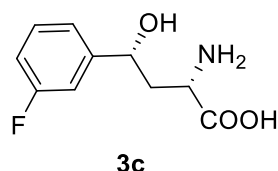

$^1\text{H}$  NMR (400 MHz,  $\text{D}_2\text{O}$ , pD = 7.0)  $\delta$  7.40 (m, 1H), 7.19 (m, 2H), 7.07 (t,  $J$  = 8.9 Hz, 1H), 4.99 (d,  $J$  = 9.4 Hz, 1H), 3.87 (m, 1H), 2.32 (m, 1H), 2.09 (dt,  $J$  = 16.5, 9.4 Hz, 1H) ppm.  $^{13}\text{C}$  NMR (100 MHz,  $\text{D}_2\text{O}$ , pD = 7.0)  $\delta$  174.2, 162.7 (d,  $^1J_{\text{C-F}}$  = 234.1 Hz), 145.7 (d,  $^3J_{\text{C-F}}$  = 7.0 Hz), 130.4 (d,  $^3J_{\text{C-F}}$  = 8.3 Hz), 121.5 (d,  $^4J_{\text{C-F}}$  = 2.6 Hz), 114.7 (d,  $^2J_{\text{C-F}}$  = 21.2 Hz), 112.5 (d,  $^2J_{\text{C-F}}$  = 22.3 Hz), 71.6, 53.8, 38.4 ppm.  $^{19}\text{F}$  NMR (376 MHz,  $\text{D}_2\text{O}$ , pD = 7.0)  $\delta$  -113.4 ppm. HRMS (ESI) (m/z) for  $[\text{M}+\text{H}]^+$   $\text{C}_{10}\text{H}_{13}\text{FNO}_3$  calculated 214.0874, observed 214.0875.  $[\alpha]_{\text{D}}^{20}$  = + 4.667 ( $c$  = 0.05, Methanol).

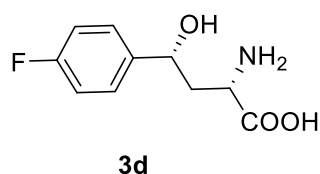

$^1\text{H}$  NMR (400 MHz,  $\text{D}_2\text{O}$ , pD = 8.0)  $\delta$  7.40 (dd,  $J$  = 8.8, 5.6 Hz, 2H), 7.13 (t,  $J$  = 8.8 Hz, 1H), 4.85 (dd,  $J$  = 8.1, 5.7 Hz, 2H), 3.38 (m, 1H), 2.14 (dt,  $J$  = 14.3, 5.7 Hz, 1H), 2.00 (dt,  $J$  = 14.3, 8.1 Hz, 1H) ppm.  $^{13}\text{C}$  NMR (100 MHz,  $\text{D}_2\text{O}$ , pD = 8.0)  $\delta$  179.9, 162.1 (d,  $^1J_{\text{C-F}}$  = 234.1 Hz), 138.9 (s), 128.0 (d,  $^3J_{\text{C-F}}$  = 8.4 Hz), 128.0 (d,  $^3J_{\text{C-F}}$  = 8.4 Hz), 115.3 (d,  $^2J_{\text{C-F}}$  = 21.6 Hz), 115.3 (d,  $^2J_{\text{C-F}}$  = 21.6 Hz), 71.5, 54.0, 41.4 ppm.  $^{19}\text{F}$  NMR (376 MHz,  $\text{D}_2\text{O}$ , pD = 8.0)  $\delta$  -115.3 ppm. HRMS (ESI) (m/z) for  $[\text{M}+\text{H}]^+$   $\text{C}_{10}\text{H}_{13}\text{ClNO}_3$  calculated 214.0874, observed 214.0868.

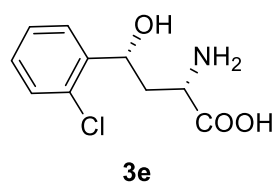

$^1\text{H}$  NMR (400 MHz,  $\text{D}_2\text{O}$ , pD = 8.0)  $\delta$  7.56 (m, 1H), 7.40 (m, 2H), 7.29 (td,  $J$  = 7.8, 1.4 Hz, 1H), 5.31 (dd,  $J$  = 9.0, 4.0 Hz, 1H), 3.59 (t,  $J$  = 6.5 Hz, 1H), 2.22 (ddd,  $J$  = 14.5, 6.5, 4.0 Hz, 1H), 1.93 (m, 1H) ppm.  $^{13}\text{C}$  NMR (100 MHz,  $\text{D}_2\text{O}$ , pD = 8.0)  $\delta$  178.6, 140.4, 131.4, 129.5, 129.1, 127.5, 126.9, 68.4, 53.9, 39.8 ppm. HRMS (ESI) (m/z) for  $[\text{M}+\text{H}]^+$   $\text{C}_{10}\text{H}_{13}\text{ClNO}_3$  calculated 230.0578, observed 230.0575.

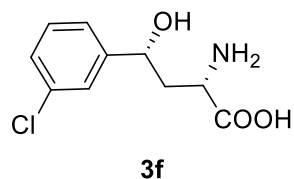

$^1\text{H}$  NMR (400 MHz,  $\text{D}_2\text{O}$ , pD = 8.0)  $\delta$  7.43 (s, 1H), 7.34 (m, 3H), 4.79 (m, partially overlapped by solvent, 1H), 3.19 (m, 1H), 2.05 (dt,  $J$  = 14.0, 6.1 Hz, 1H), 1.92 (dt,  $J$  = 14.0, 7.8 Hz, 1H) ppm.  $^{13}\text{C}$  NMR (100 MHz,  $\text{D}_2\text{O}$ , pD = 8.0)  $\delta$  182.5, 145.4, 133.8,



130.2, 127.8, 126.1, 124.6, 71.5, 54.0, 42.9 ppm. HRMS (ESI) (m/z) for [M+H]<sup>+</sup> C<sub>10</sub>H<sub>13</sub>ClNO<sub>3</sub> calculated 230.0578, observed 230.0584.

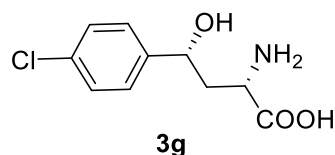

<sup>1</sup>H NMR (400 MHz, D<sub>2</sub>O, pD = 8.0) δ 7.41 (d, *J* = 8.3 Hz, 2H), 7.36 (d, *J* = 8.3 Hz, 2H), 4.85 (dd, *J* = 8.4, 5.5 Hz, 1H), 3.43 (m, 1H), 2.14 (dt, *J* = 14.0, 5.5 Hz, 1H), 1.99 (dt, *J* = 14.0, 8.4 Hz, 1H) ppm. <sup>13</sup>C NMR (125 MHz, D<sub>2</sub>O, pD = 8.0) δ 179.3, 141.8, 133.0, 128.7, 128.7, 127.7, 127.7, 71.6, 54.0, 41.2 ppm. HRMS (ESI) (m/z) for [M+H]<sup>+</sup> C<sub>10</sub>H<sub>13</sub>ClNO<sub>3</sub> calculated 230.0578, observed 230.0580.

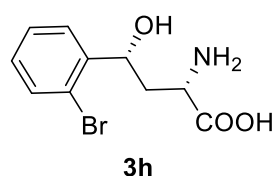

<sup>1</sup>H NMR (400 MHz, D<sub>2</sub>O, pD = 8.0) δ 7.60 (d, *J* = 8.0 Hz, 1H), 7.54 (m, 1H), 7.42 (t, *J* = 7.6 Hz, 1H), 7.22 (m, 1H), 5.23 (dd, *J* = 8.9, 4.4 Hz, 1H), 3.42 (t, *J* = 6.8 Hz, 1H), 2.13 (ddd, *J* = 14.2, 6.8, 4.4 Hz, 1H), 1.86 (m, 1H) ppm. <sup>13</sup>C NMR (100 MHz, D<sub>2</sub>O, pD = 8.0) δ 181.1, 142.1, 132.7, 129.4, 128.1, 127.2, 121.6, 70.6, 54.0, 41.5 ppm. HRMS (ESI) (m/z) for [M+H]<sup>+</sup> C<sub>10</sub>H<sub>13</sub>BrNO<sub>3</sub> calculated 274.0073, observed 274.0074.

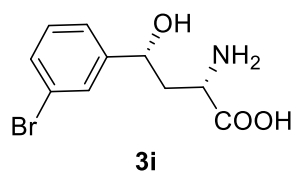

<sup>1</sup>H NMR (400 MHz, D<sub>2</sub>O, pD = 8.0) δ 7.59 (s, 1H), 7.51 (d, *J* = 7.7 Hz, 1H), 7.33 (m, 2H), 4.79 (m, 1H, partially overlapped with solvent), 3.24 (m, 1H), 2.07 (m, 1H), 1.93 (m, 1H) ppm. <sup>13</sup>C NMR (100 MHz, D<sub>2</sub>O, pD = 8.0) δ 181.9, 145.7, 130.8, 130.5, 129.1, 125.0, 122.0, 71.6, 54.0, 42.6 ppm. HRMS (ESI) (m/z) for [M+H]<sup>+</sup> C<sub>10</sub>H<sub>13</sub>BrNO<sub>3</sub> calculated 274.0073, observed 274.0078.

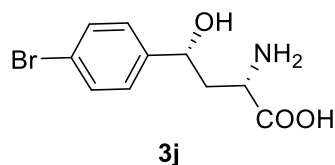

<sup>1</sup>H NMR (400 MHz, D<sub>2</sub>O, pD = 8.0) δ 7.56 (d, *J* = 8.8 Hz, 2H), 7.30 (d, *J* = 8.8 Hz, 2H), 4.75 (m, 1H, partially overlapped with solvent), 3.16 (dd, *J* = 7.7, 5.7 Hz, 1H), 2.04 (dt, *J* = 14.4, 5.7 Hz, 1H), 1.92 (dt, *J* = 14.4, 7.7 Hz, 1H) ppm. <sup>13</sup>C NMR (125 MHz, D<sub>2</sub>O, pD = 8.0) δ 182.7, 142.4, 131.6, 131.6, 128.2, 128.2, 121.0, 71.6, 54.1, 42.9. HRMS (ESI) (m/z) for [M+H]<sup>+</sup> C<sub>10</sub>H<sub>13</sub>BrNO<sub>3</sub> calculated 274.0073, observed 274.0080.

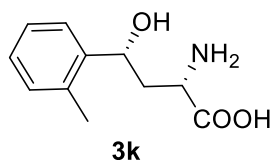

$^1\text{H}$  NMR (400 MHz,  $\text{D}_2\text{O}$ , pD = 8.0)  $\delta$  7.47 (d,  $J$  = 7.5 Hz, 1H), 7.25 (m, 3H), 5.19 (dd,  $J$  = 9.0, 3.3 Hz, 1H), 3.73 (m, 1H), 2.31 (s, 3H), 2.12 (m, 1H), 1.97 (dt,  $J$  = 15.2, 9.0 Hz, 1H) ppm.  $^{13}\text{C}$  NMR (100 MHz,  $\text{D}_2\text{O}$ , pD = 8.0)  $\delta$  176.9, 141.4, 134.9, 130.5, 127.7, 126.4, 125.0, 68.4, 54.1, 39.3, 18.0 ppm. HRMS (ESI) ( $m/z$ ) for  $[\text{M}+\text{H}]^+$   $\text{C}_{11}\text{H}_{16}\text{NO}_3$  calculated 210.1125, observed 210.1120.

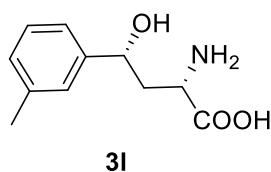

$^1\text{H}$  NMR (400 MHz,  $\text{D}_2\text{O}$ , pD = 8.0)  $\delta$  7.32 (t,  $J$  = 7.6 Hz, 1H), 7.25 (s, 1H), 7.20 (m, 2H), 4.75 (m, 1H, partially overlapped with solvent), 3.20 (t,  $J$  = 6.9 Hz, 1H), 2.33 (s, 3H), 2.06 (m, 1H), 1.95 (m, 1H) ppm.  $^{13}\text{C}$  NMR (100 MHz,  $\text{D}_2\text{O}$ , pD = 8.0)  $\delta$  182.4, 143.2, 138.8, 128.7, 128.5, 126.8, 123.2, 72.1, 54.0, 42.8, 20.4 ppm. HRMS (ESI) ( $m/z$ ) for  $[\text{M}+\text{H}]^+$   $\text{C}_{11}\text{H}_{16}\text{NO}_3$  calculated 210.1125, observed 210.1122.

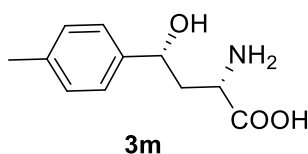

$^1\text{H}$  NMR (400 MHz,  $\text{D}_2\text{O}$ , pD = 9.0)  $\delta$  7.30 (d,  $J$  = 8.1, 2H), 7.25 (d,  $J$  = 8.1 Hz, 2H), 4.76 (m, partially overlapped with solvent, 1H), 3.15 (dd,  $J$  = 8.0, 5.7 Hz, 1H), 2.31 (s, 3H), 2.05 (m, 1H), 1.94 (dt,  $J$  = 13.5, 8.0 Hz, 1H) ppm.  $^{13}\text{C}$  NMR (100 MHz,  $\text{D}_2\text{O}$ , pD = 9.0)  $\delta$  182.7, 140.0, 138.1, 129.2, 129.2, 126.3, 126.3, 71.9, 54.0, 42.9, 20.1 ppm. HRMS (ESI) ( $m/z$ ) for  $[\text{M}+\text{H}]^+$   $\text{C}_{11}\text{H}_{16}\text{NO}_3$  calculated 210.1125, observed 210.1130.

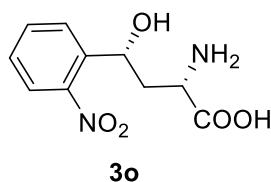

$^1\text{H}$  NMR (400 MHz,  $\text{D}_2\text{O}$ , pD = 7.0)  $\delta$  8.01 (d,  $J$  = 8.3 Hz, 1H), 7.83 (m, 1H), 7.75 (m, 1H), 7.52 (m, 1H), 5.51 (d,  $J$  = 9.9 Hz, 1H), 3.96 (m, 1H), 2.46 (m, 1H), 2.08 (m, 1H) ppm.  $^{13}\text{C}$  NMR (125 MHz,  $\text{D}_2\text{O}$ , pD = 7.0)  $\delta$  174.1, 146.9, 138.8, 134.4, 128.9, 127.7, 124.7, 67.7, 54.2, 38.2 ppm. HRMS (ESI) ( $m/z$ ) for  $[\text{M}+\text{H}]^+$   $\text{C}_{10}\text{H}_{13}\text{N}_2\text{O}_5$  calculated 241.0819, observed 241.0825.

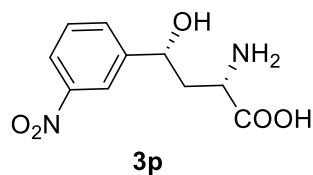

$^1\text{H}$  NMR (400 MHz,  $\text{D}_2\text{O}$ , pD = 8.0)  $\delta$  8.26 (s, 1H), 8.17 (m, 1H), 7.79 (d,  $J$  = 7.7 Hz, 1H), 7.61 (t,  $J$  = 8.0 Hz, 1H), 5.01 (dd,  $J$  = 8.8, 4.9 Hz, 1H), 3.49 (m, 1H), 2.19 (dt,  $J$  = 14.3, 4.9 Hz, 1H), 2.02 (dt,  $J$  = 14.3, 8.4 Hz, 1H) ppm.  $^{13}\text{C}$  NMR (125 MHz,  $\text{D}_2\text{O}$ , pD = 8.0)  $\delta$  179.5, 148.0, 145.3, 132.8, 129.8, 122.9, 121.0, 71.4, 54.0, 41.3 ppm. HRMS (ESI) (m/z) for  $[\text{M}+\text{H}]^+$   $\text{C}_{10}\text{H}_{13}\text{N}_2\text{O}_5$  calculated 241.0819, observed 241.0822.

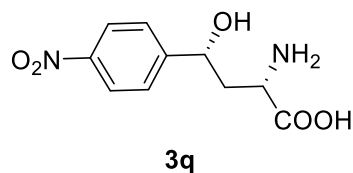

$^1\text{H}$  NMR (400 MHz,  $\text{D}_2\text{O}$ , pD = 9.0)  $\delta$  8.23 (d,  $J$  = 8.4 Hz, 2H), 7.59 (d,  $J$  = 8.4 Hz, 2H), 4.93 (m, 1H), 3.24 (t,  $J$  = 6.9 Hz, 1H), 2.07 (dt,  $J$  = 13.8, 6.9 Hz, 1H), 1.94 (dt,  $J$  = 13.8, 6.9 Hz, 1H) ppm.  $^{13}\text{C}$  NMR (100 MHz,  $\text{D}_2\text{O}$ , pD = 9.0) 182.5, 151.2, 147.0, 127.0, 127.0, 123.9, 123.9, 71.3, 54.0, 43.0 ppm. HRMS (ESI) (m/z) for  $[\text{M}+\text{H}]^+$   $\text{C}_{10}\text{H}_{13}\text{N}_2\text{O}_5$  calculated 241.0819, observed 241.0823.

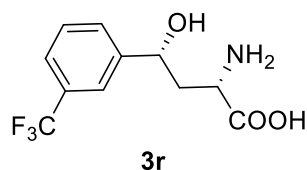

$^1\text{H}$  NMR (400 MHz,  $\text{D}_2\text{O}$ , pD = 9.0)  $\delta$  7.72 (s, 1H), 7.64 (m, 2H), 7.56 (t,  $J$  = 7.8 Hz, 1H), 4.92 (t,  $J$  = 6.6 Hz, 1H), 3.36 (t,  $J$  = 6.6 Hz, 1H), 2.13 (m, 1H), 1.98 (m, 1H) ppm.  $^{13}\text{C}$  NMR (125 MHz,  $\text{D}_2\text{O}$ , pD = 9.0)  $\delta$  180.7, 144.3, 130.1 (q,  $^2J_{\text{C-F}}$  = 32.0 Hz), 129.8, 129.4, 124.7 (q,  $^3J_{\text{C-F}}$  = 4.0 Hz), 124.2 (q,  $^1J_{\text{C-F}}$  = 271.6 Hz), 122.8 (q,  $^3J_{\text{C-F}}$  = 4.0 Hz), 71.7, 54.1, 42.0 ppm.  $^{19}\text{F}$  NMR (376 MHz,  $\text{D}_2\text{O}$ , pD = 9.0)  $\delta$  -62.4 ppm. HRMS (ESI) (m/z) for  $[\text{M}+\text{H}]^+$   $\text{C}_{11}\text{H}_{13}\text{F}_3\text{NO}_3$  calculated 264.0842, observed 264.0846.

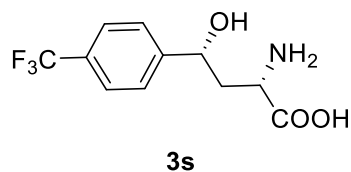

$^1\text{H}$  NMR (400 MHz,  $\text{D}_2\text{O}$ , pD = 8.0)  $\delta$  7.72 (d,  $J$  = 8.0 Hz, 2H), 7.55 (d,  $J$  = 8.0 Hz, 2H), 4.88 (t,  $J$  = 7.0 Hz, 1H), 3.19 (t,  $J$  = 7.0 Hz, 1H), 2.06 (dt,  $J$  = 14.2, 7.0 Hz, 1H), 1.94 (dt,  $J$  = 14.2, 7.0 Hz, 1H).  $^{13}\text{C}$  NMR (125 MHz,  $\text{D}_2\text{O}$ , pD = 8.0)  $\delta$  182.6, 147.5, 129.2 (q,  $^2J_{\text{C-F}}$  = 32.1 Hz), 126.6, 126.6, 125.6 (q,  $^3J_{\text{C-F}}$  = 3.9 Hz), 125.6 (q,  $^3J_{\text{C-F}}$  = 3.9 Hz), 124.2 (q,  $^1J_{\text{C-F}}$  = 271.3 Hz), 71.6, 54.1, 43.0 ppm.  $^{19}\text{F}$  NMR (376 MHz,  $\text{D}_2\text{O}$ , pD =

8.0)  $\delta$  -62.3 ppm. HRMS (ESI) (m/z) for  $[M+H]^+$   $C_{11}H_{13}F_3NO_3$  calculated 264.0842, observed 264.0845.

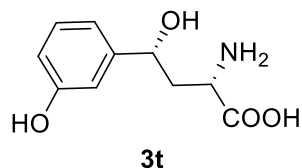

$^1H$  NMR (400 MHz,  $D_2O$ , pD = 7.0)  $\delta$  7.28 (t,  $J$  = 7.9 Hz, 1H), 6.95 (d,  $J$  = 7.9 Hz, 1H), 6.89 (s, 1H), 6.82 (m, 1H), 4.90 (m, 1H), 3.84 (dd,  $J$  = 8.6, 4.7 Hz, 1H), 2.28 (dt,  $J$  = 15.0, 4.7 Hz, 1H), 2.08 (dt,  $J$  = 15.0, 8.6 Hz, 1H) ppm.  $^{13}C$  NMR (100 MHz,  $D_2O$ , pD = 7.0)  $\delta$  174.2, 155.6, 145.1, 130.2, 117.7, 114.9, 112.5, 71.9, 53.8, 38.5 ppm. HRMS (ESI) (m/z) for  $[M+H]^+$   $C_{10}H_{14}NO_4$  calculated 212.0917, observed 212.0913.

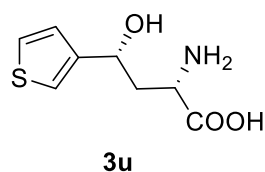

$^1H$  NMR (400 MHz,  $D_2O$ , pD = 7.0)  $\delta$  7.47 (m, 1H), 7.39 (s, 1H), 7.17 (m, 1H), 5.06 (dd,  $J$  = 9.1, 3.7 Hz, 1H), 3.84 (m, 1H), 2.41 (m, 1H), 2.18 (dt,  $J$  = 14.9, 9.1 Hz, 1H) ppm.  $^{13}C$  NMR (100 MHz,  $D_2O$ , pD = 7.0)  $\delta$  174.2, 144.0, 127.1, 125.5, 121.9, 68.1, 53.7, 37.8 ppm. HRMS (ESI) (m/z) for  $[M+H]^+$   $C_8H_{12}NO_3S$  calculated 202.0532, observed 202.0530.

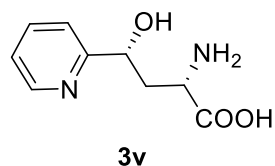

$^1H$  NMR (400 MHz,  $D_2O$ , pD = 7.0)  $\delta$  8.46 (d,  $J$  = 4.9 Hz, 1H), 7.88 (td,  $J$  = 7.9, 2.0 Hz, 1H), 7.54 (d,  $J$  = 7.9 Hz, 1H), 7.37 (m, 1H), 5.04 (m, 1H), 3.92 (dd,  $J$  = 9.1, 4.4 Hz, 1H), 2.40 (dt,  $J$  = 14.6, 4.4 Hz, 1H), 2.12 (dt,  $J$  = 14.6, 9.1 Hz, 1H) ppm.  $^{13}C$  NMR (100 MHz,  $D_2O$ , pD = 7.0)  $\delta$  174.2, 160.7, 148.2, 138.6, 123.5, 120.9, 72.4, 53.7, 37.1 ppm. HRMS (ESI) (m/z) for  $[M+H]^+$   $C_9H_{13}N_2O_3$  calculated 197.0921, observed 197.0919.

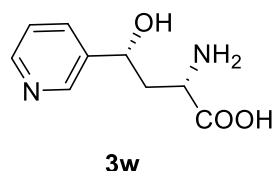

$^1H$  NMR (400 MHz,  $D_2O$ , pD = 7.0)  $\delta$  8.53 (s, 1H), 8.45 (d,  $J$  = 4.8 Hz, 1H), 7.89 (d,  $J$  = 8.0, 1H), 7.46 (dd,  $J$  = 8.0, 4.8 Hz, 1H), 5.07 (dd,  $J$  = 10.2, 4.0 Hz, 1H), 3.91 (dd,  $J$  = 8.5, 4.0 Hz, 1H), 2.33 (dt,  $J$  = 14.9, 4.0 Hz, 1H), 2.14 (ddd,  $J$  = 14.9, 10.2, 8.5 Hz, 1H) ppm.  $^{13}C$  NMR (100 MHz,  $D_2O$ , pD = 7.0)  $\delta$  174.1, 148.4, 146.2, 139.1, 135.1, 124.3,

70.0, 53.9, 38.2 ppm. HRMS (ESI) ( $m/z$ ) for  $[M+H]^+$   $C_9H_{13}N_2O_3$  calculated 197.0921, observed 197.0918.

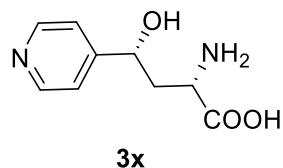

$^1H$  NMR (400 MHz,  $D_2O$ ,  $pD = 7.0$ )  $\delta$  8.49 (d,  $J = 4.9$  Hz, 2H), 7.45 (d,  $J = 4.9$  Hz, 2H), 5.04 (m, 1H), 3.91 (dd,  $J = 8.3, 5.2$  Hz, 1H), 2.33 (m, 1H), 2.04 (dt,  $J = 14.8, 8.3$  Hz, 1H) ppm.  $^{13}C$  NMR (100 MHz,  $D_2O$ ,  $pD = 7.0$ ) 174.1, 153.5, 148.8, 148.8, 121.1, 121.1, 70.8, 53.8, 38.1 ppm. HRMS (ESI) ( $m/z$ ) for  $[M+H]^+$   $C_9H_{13}N_2O_3$  calculated 197.0921, observed 197.0916.

### Preparative scale of ApUstD

For preparative scale product of ApUstD, 62.5 ml reactions containing 0.4 mg/ml ApUstD, 100 mg  $L$ -Aspartic acid, 80 mM **1c**, 1 mM DTT, 100  $\mu$ M PLP and 50 mM sodium phosphate, 50 mM NaCl, at pH 7.4 were run at 25  $^{\circ}C$ . After 72 hours, the reaction mixture was centrifugated (800 g), and then the supernatant loaded on C18 chromatography eluted with methanol in water in a stepwise manner (0%, 20%, 40%, 60%, 95%) and Fractions containing product were collected and the solvent was evaporated under vacuum to yield **2c** (134 mg, 84%).

### Supplementary Figure S7-S88

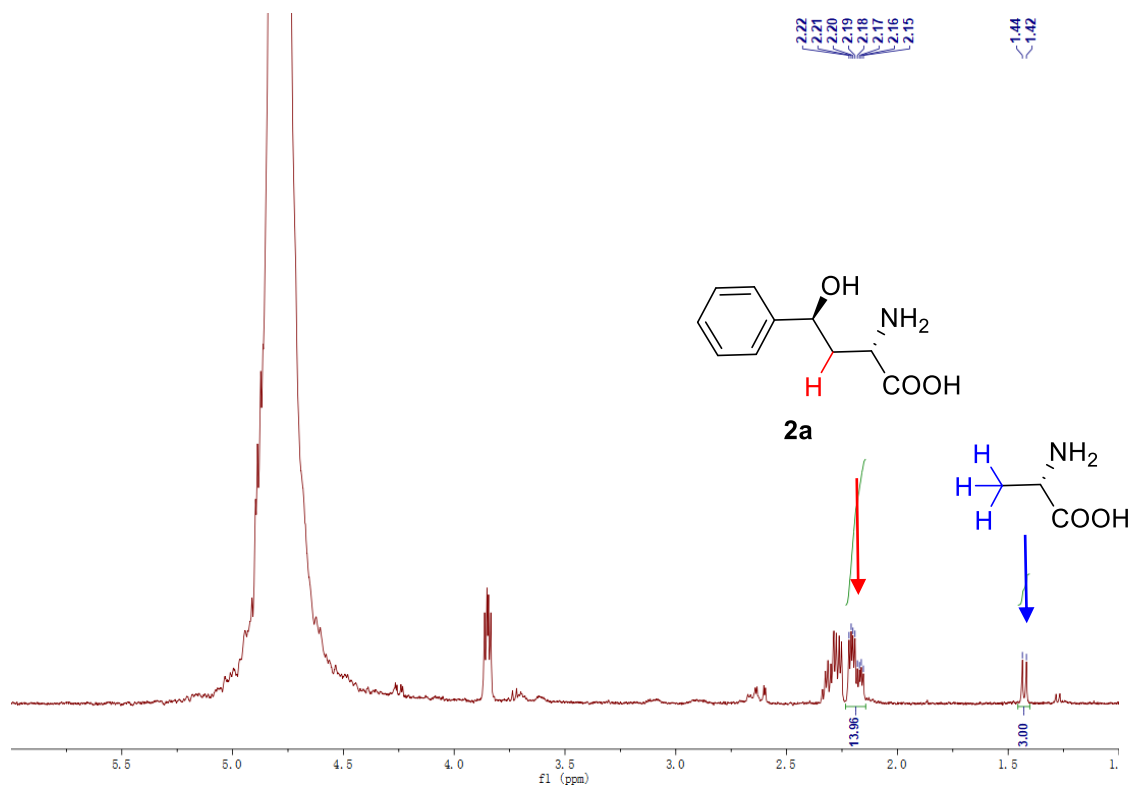

**Figure S7. Conversion of 2a**

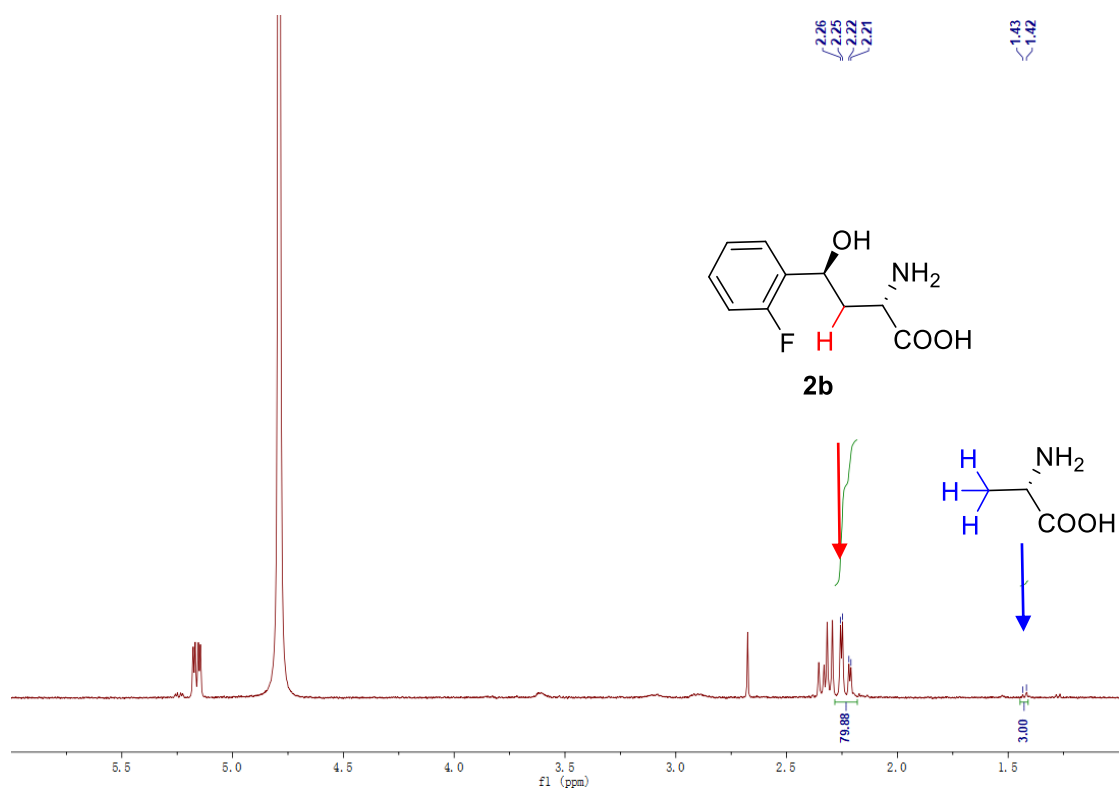

**Figure S8. Conversion of 2b**

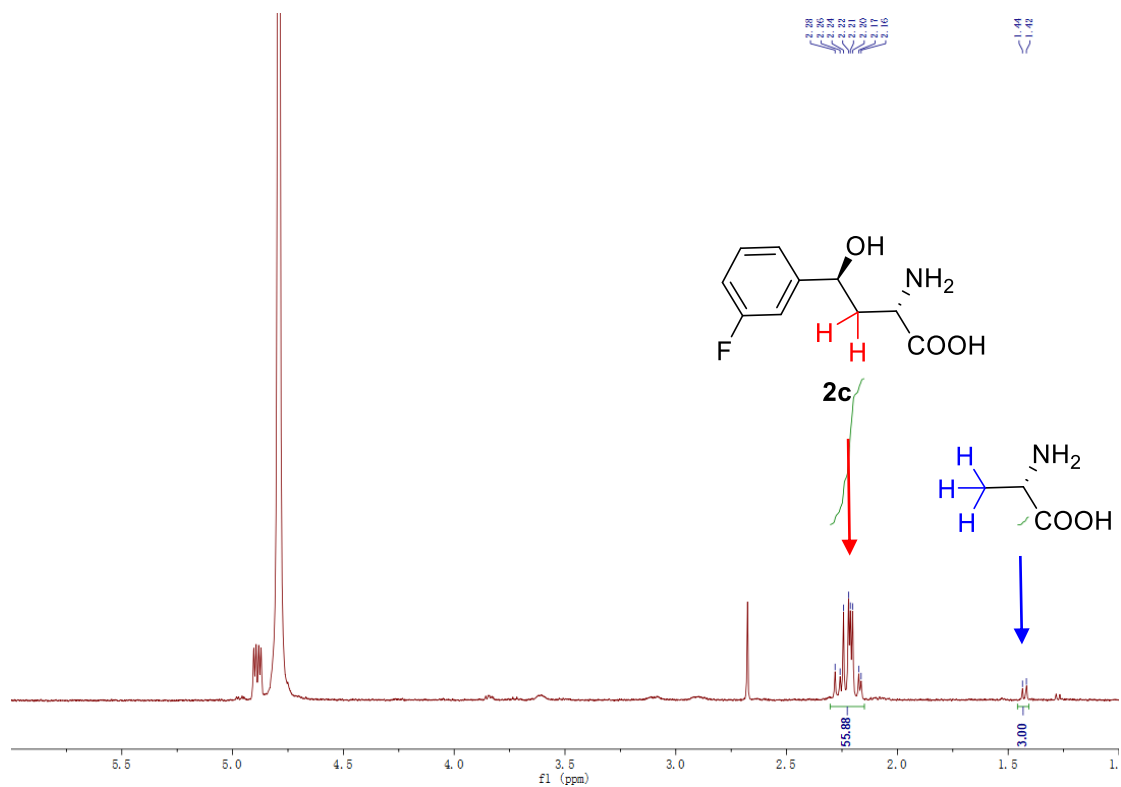

**Figure S9. Conversion of 2c**

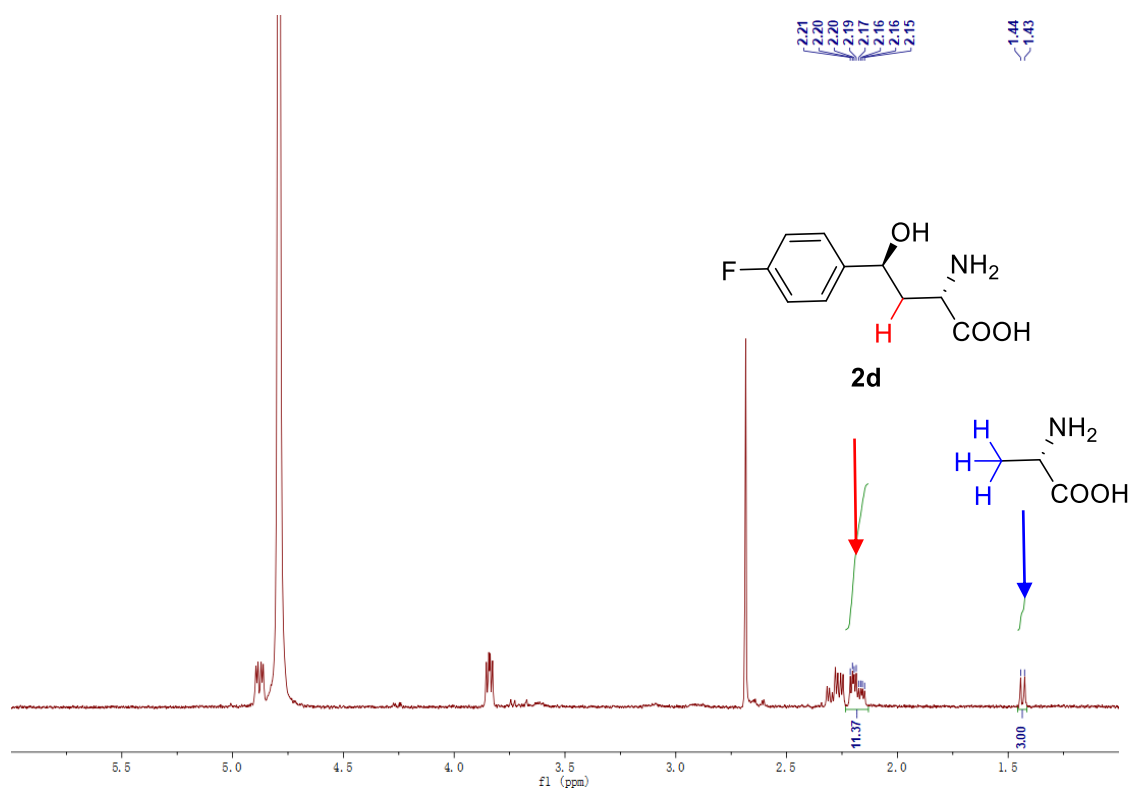

**Figure S10. Conversion of 2d**

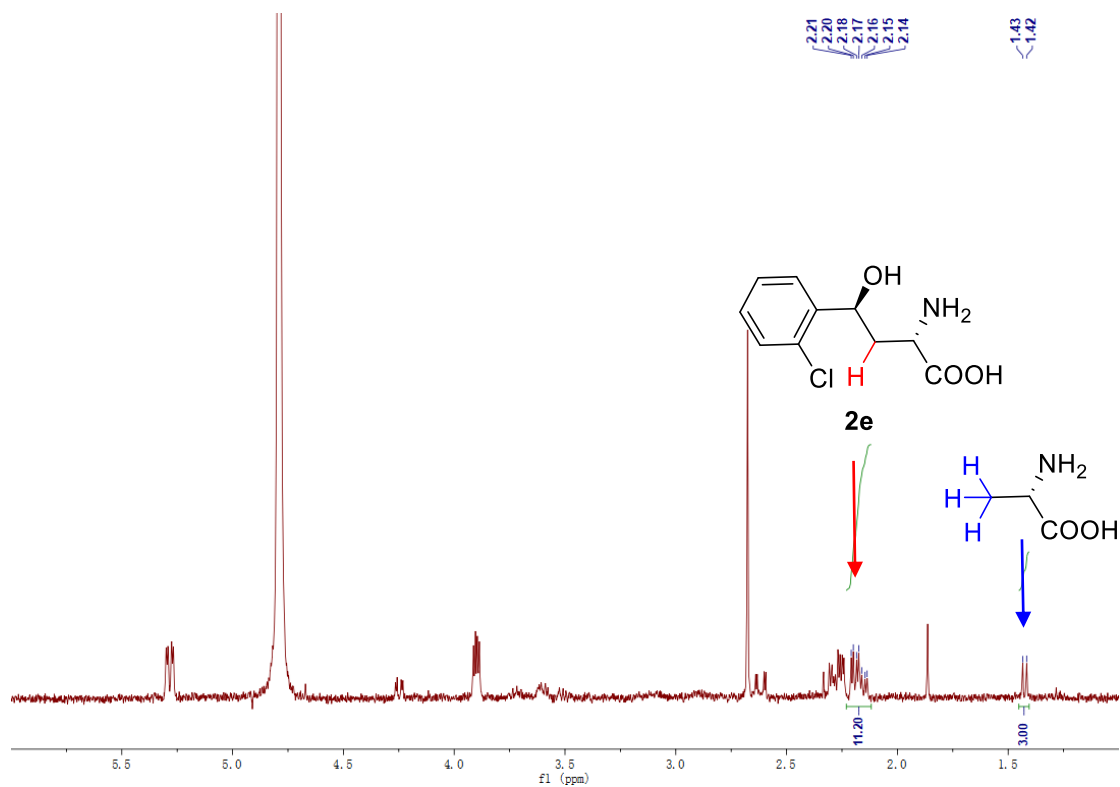

**Figure S11.** Conversion of **2e**

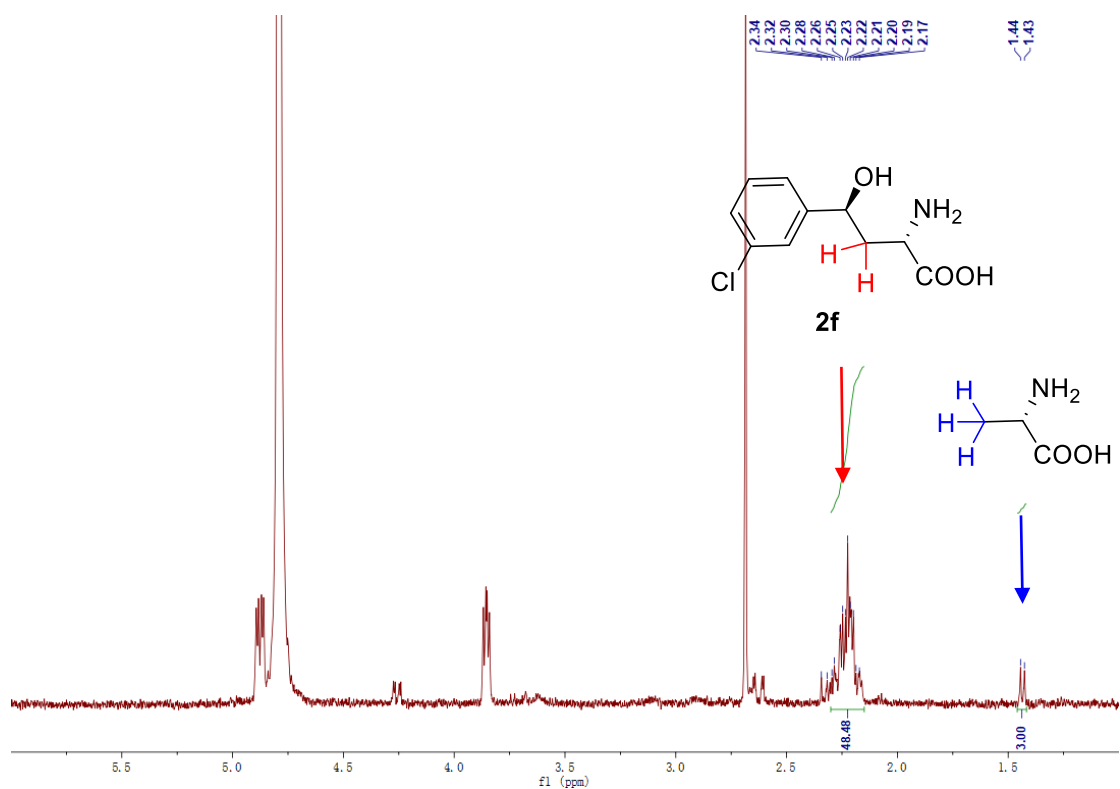

**Figure S12.** Conversion of **2f**



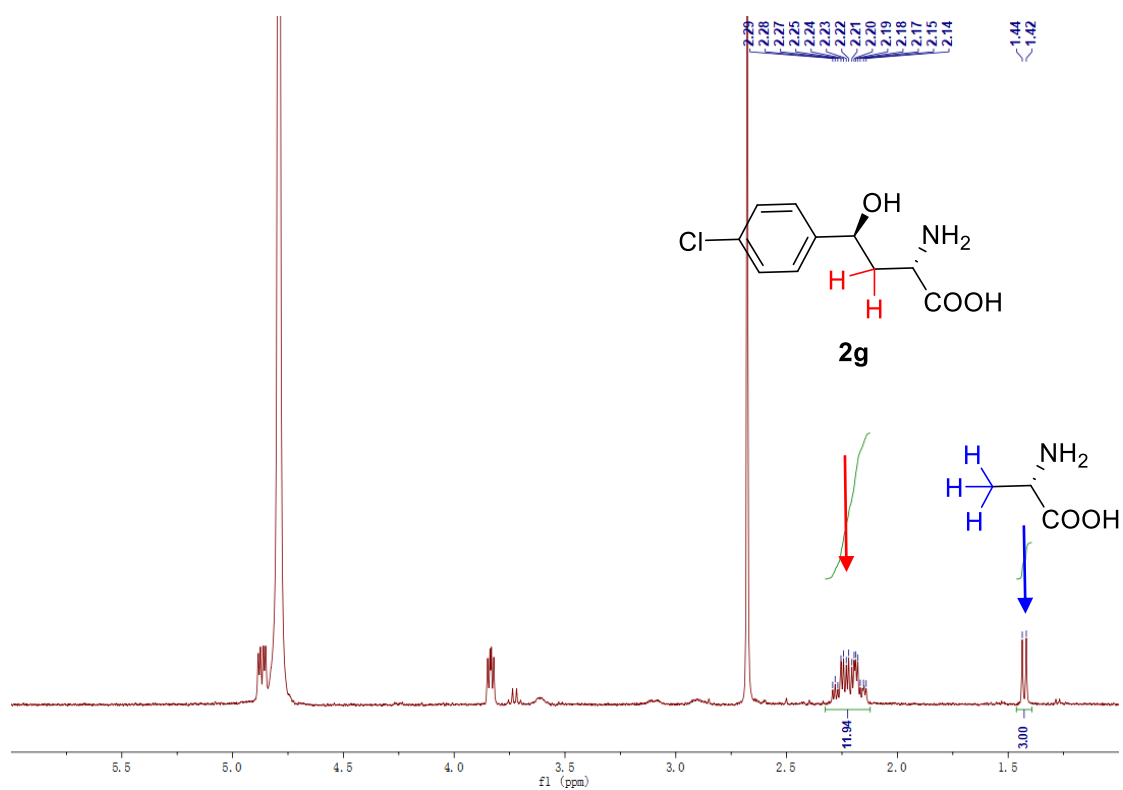

**Figure S13.** Conversion of **2g**

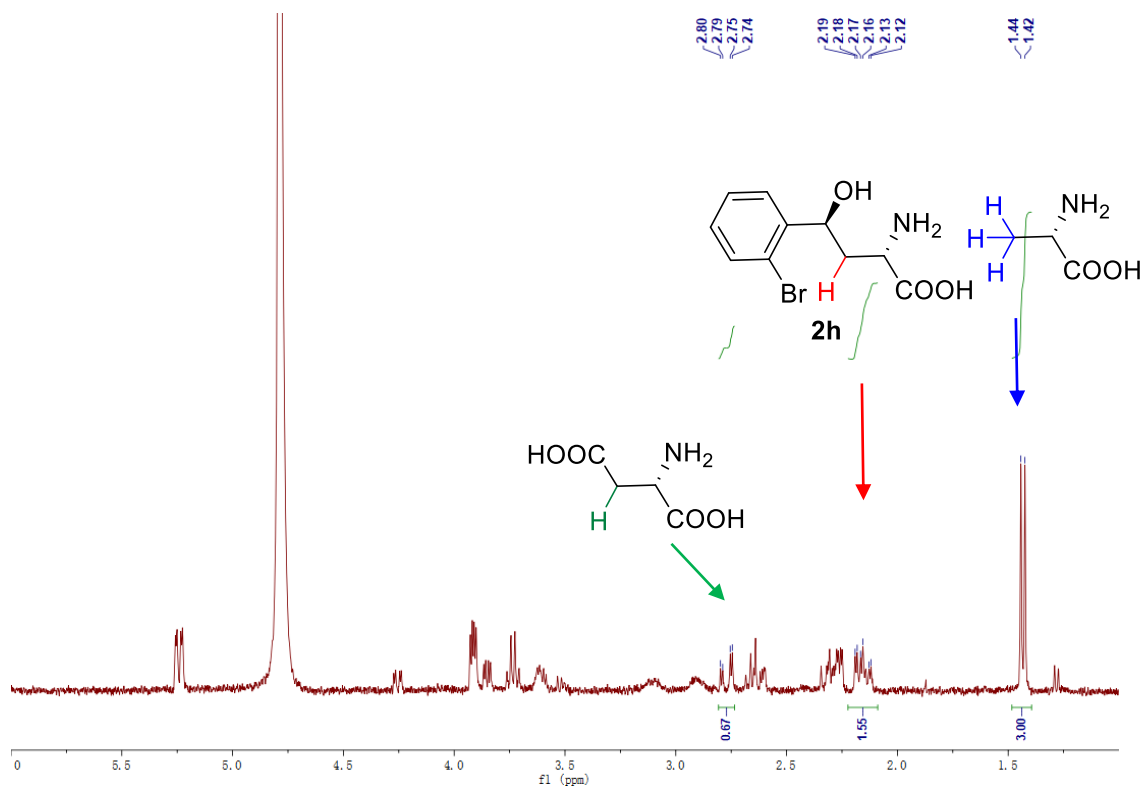

**Figure S14.** Conversion of **2h**

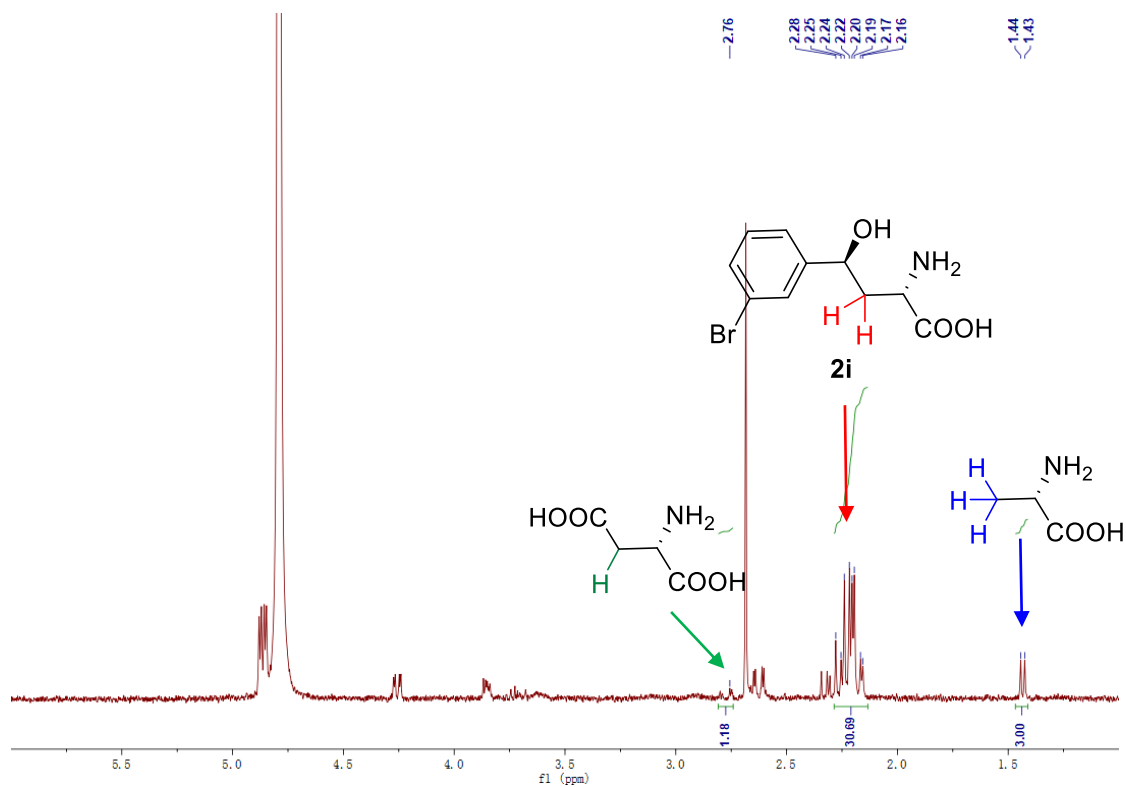

**Figure S15.** Conversion of **2i**

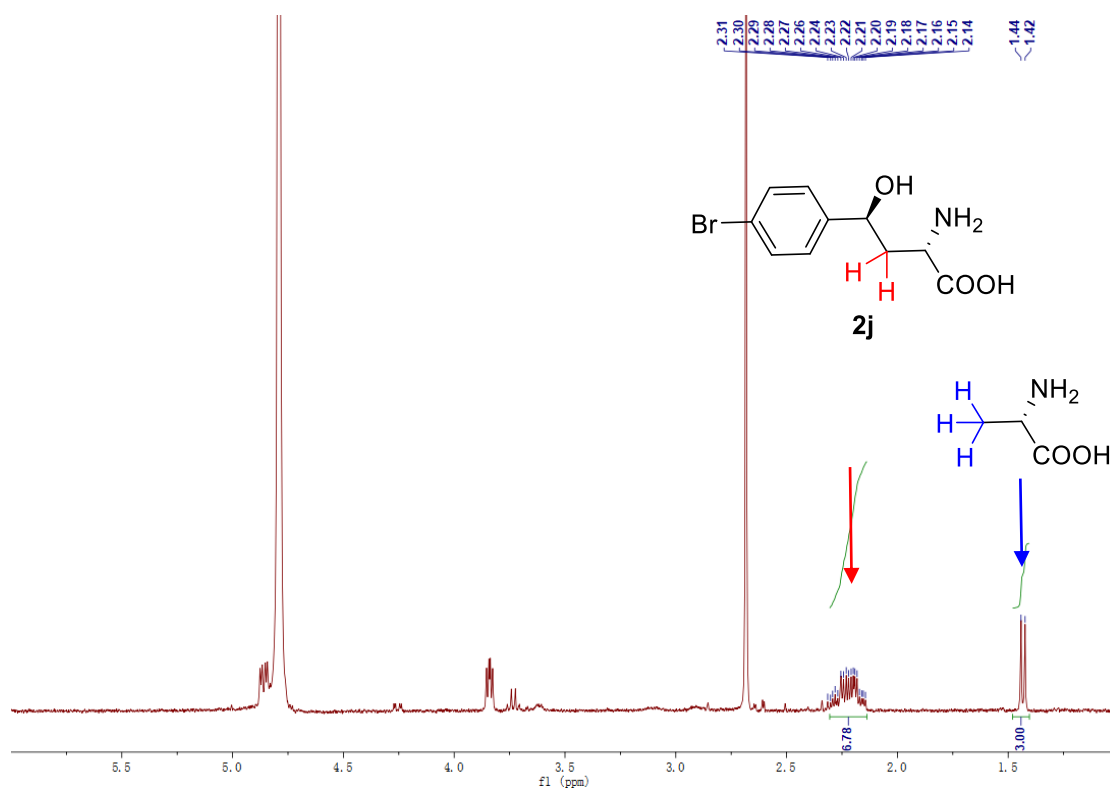

**Figure S16.** Conversion of **2j**

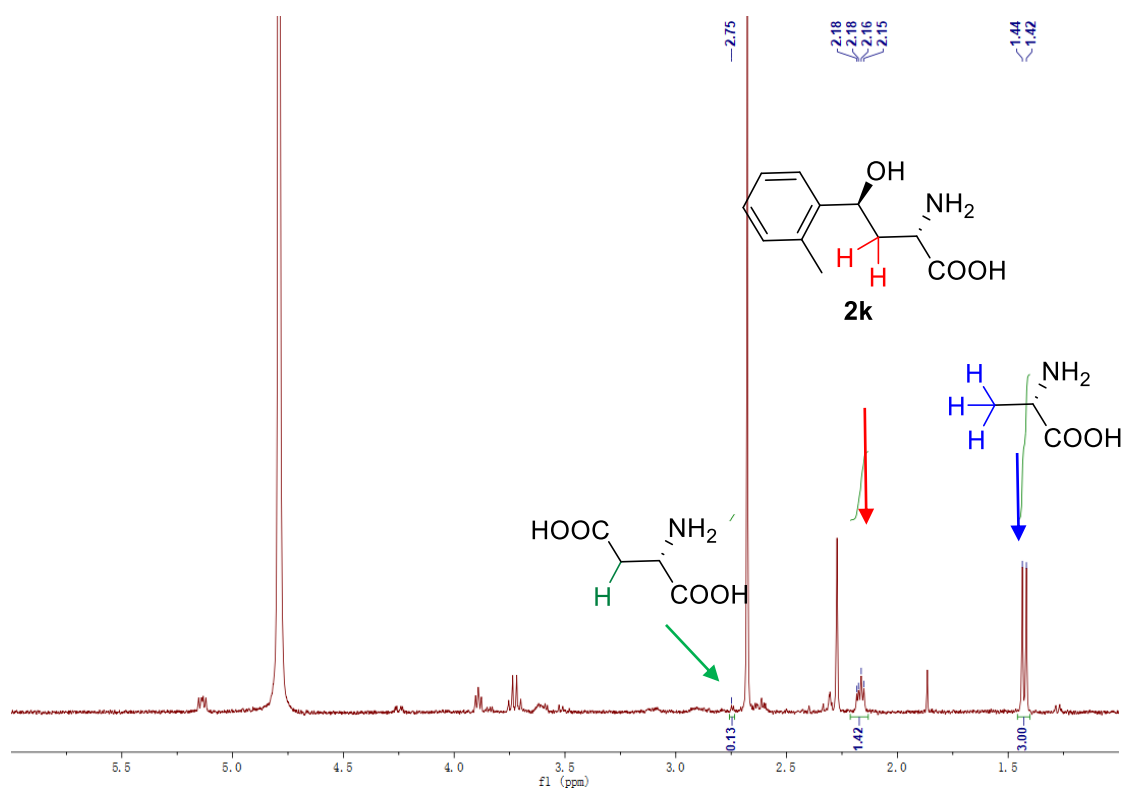

**Figure S17.** Conversion of **2k**

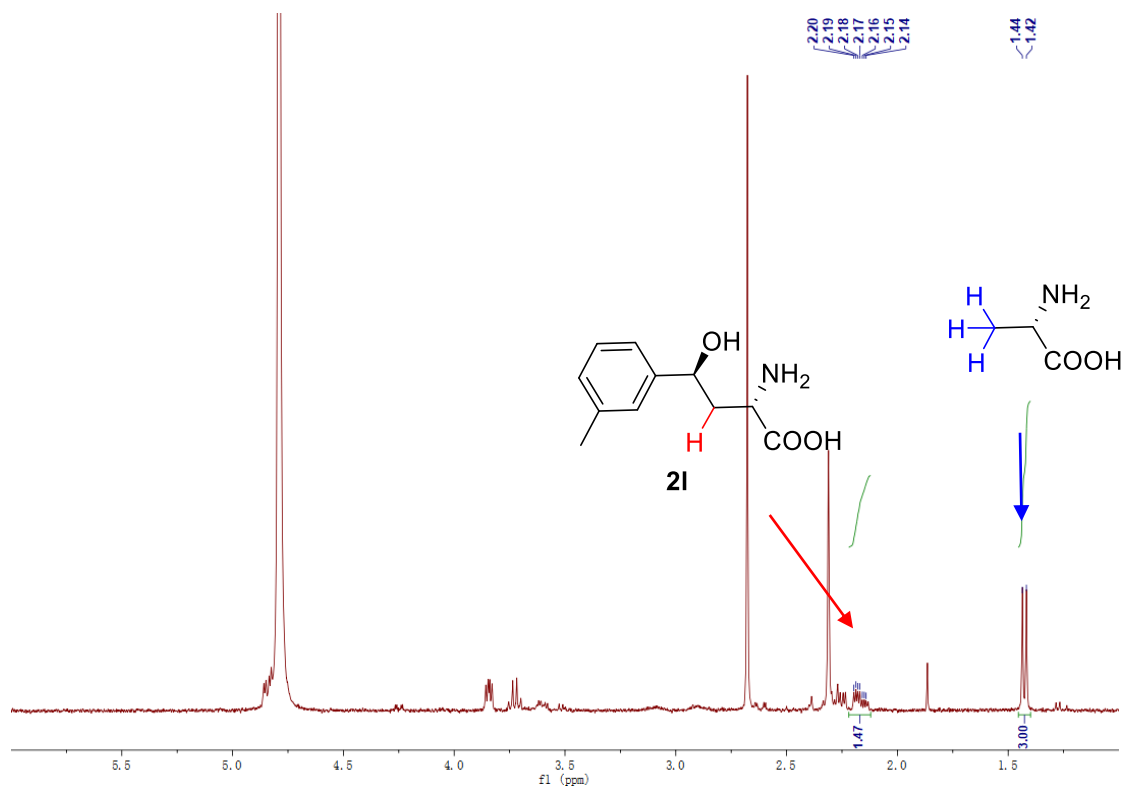

**Figure S18.** Conversion of **2l**

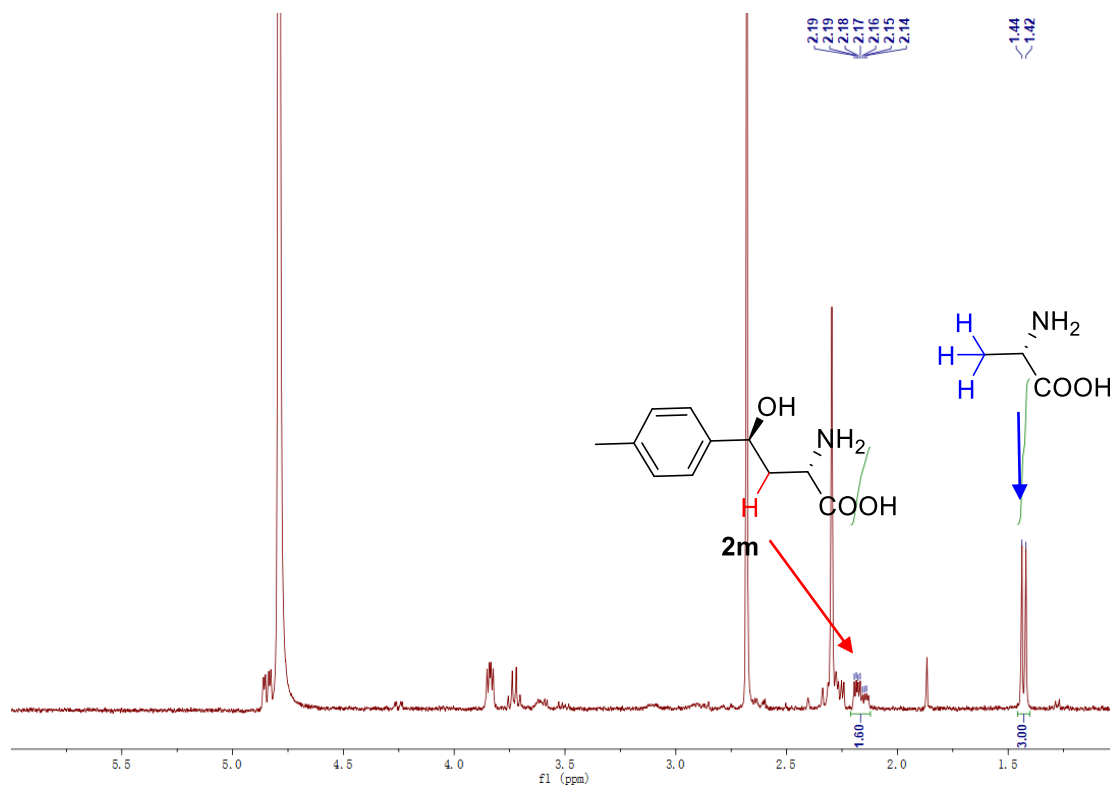

**Figure S19.** Conversion of **2m**

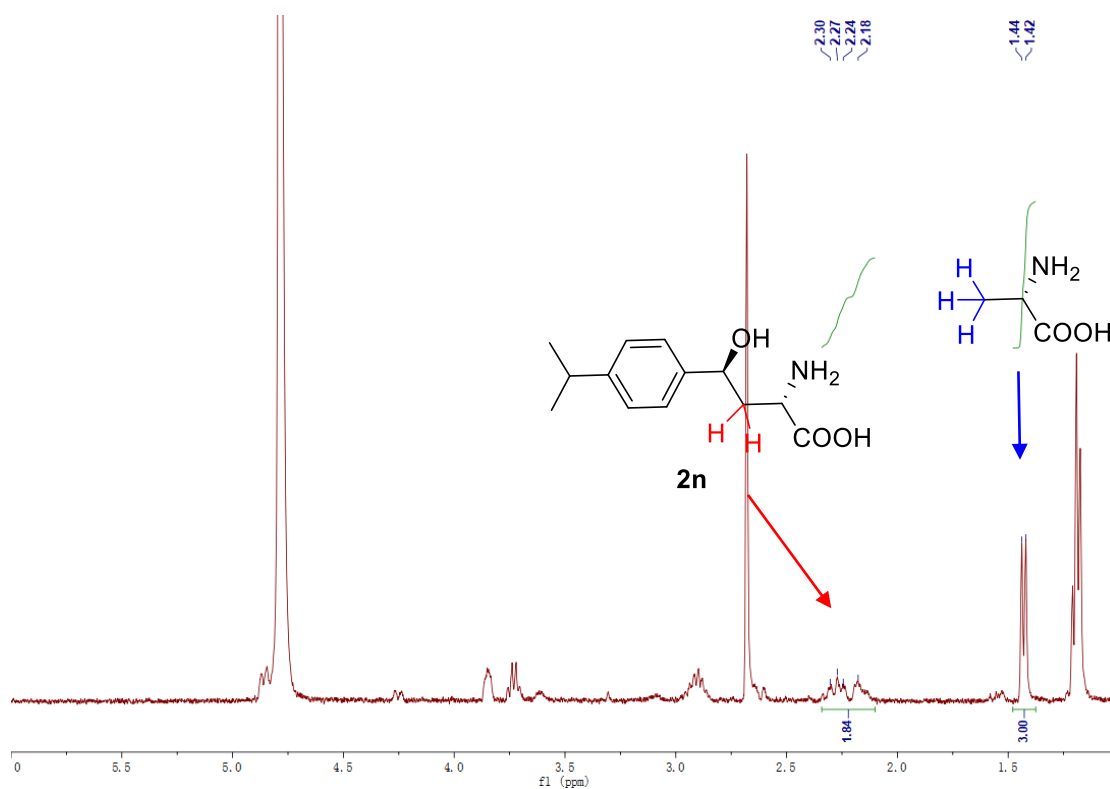

**Figure S20.** Conversion of **2n**

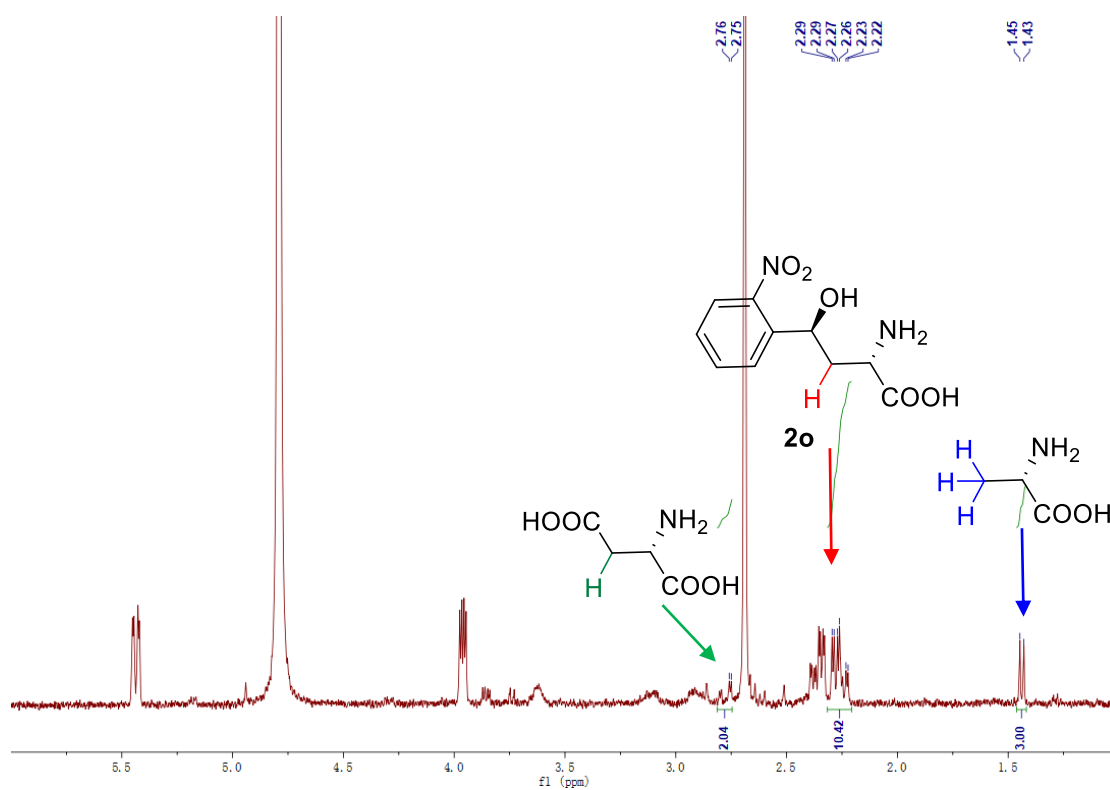

**Figure S21.** Conversion of **2o**

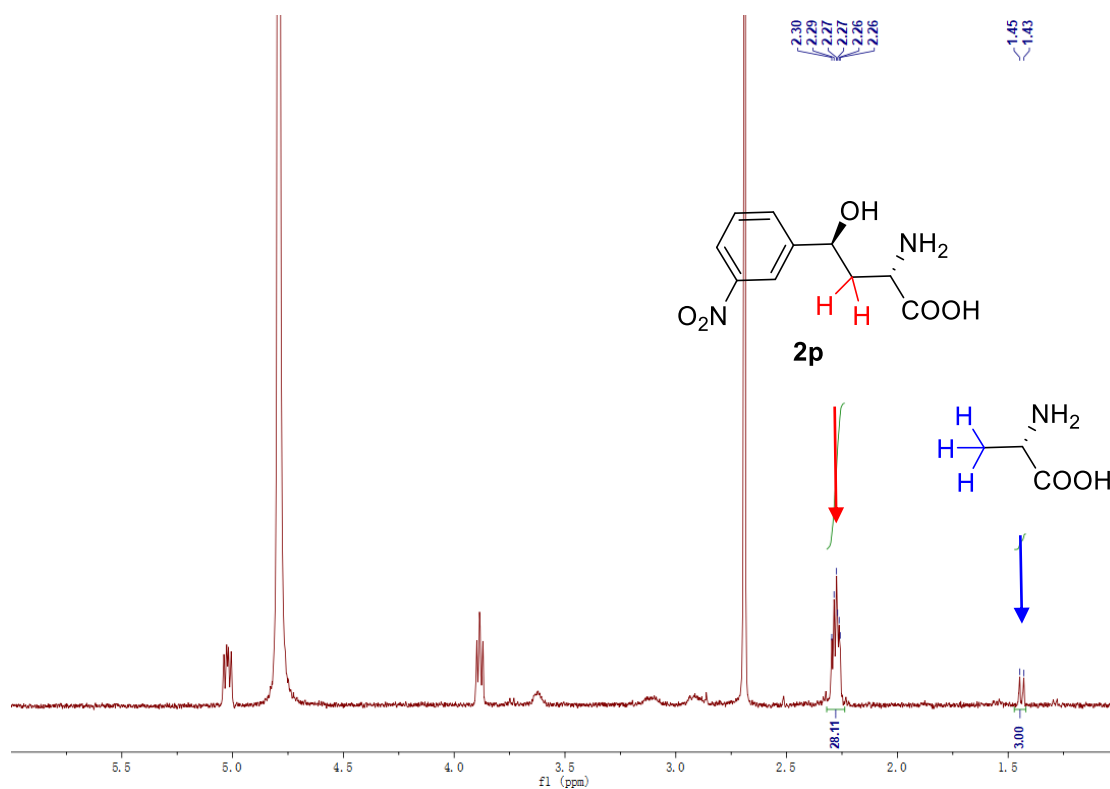

**Figure S22.** Conversion of **2p**

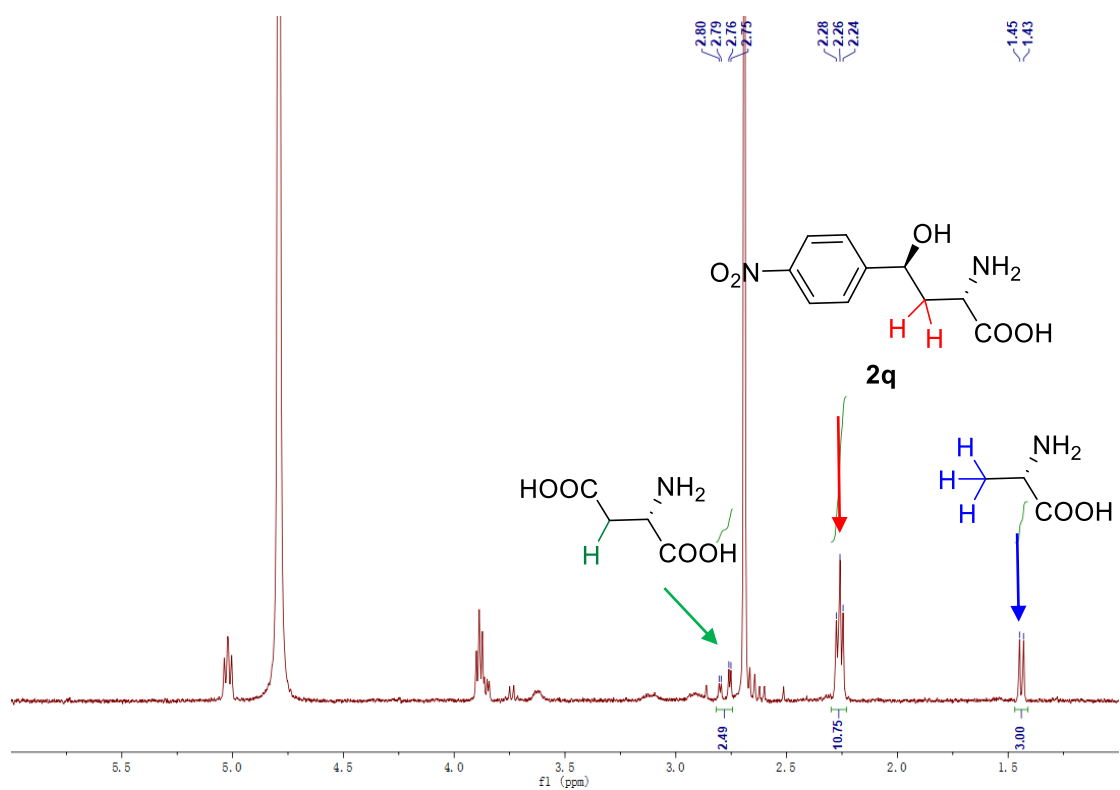

**Figure S23. Conversion of 2q**

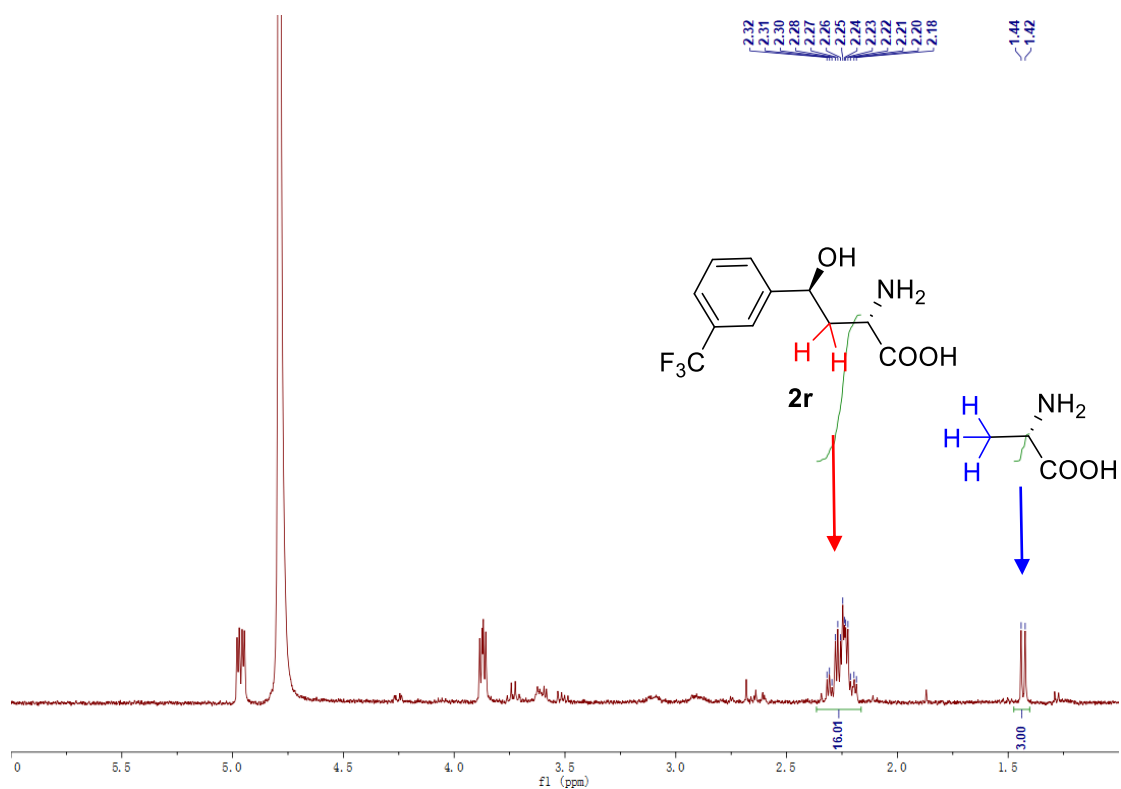

**Figure S24. Conversion of 2r**

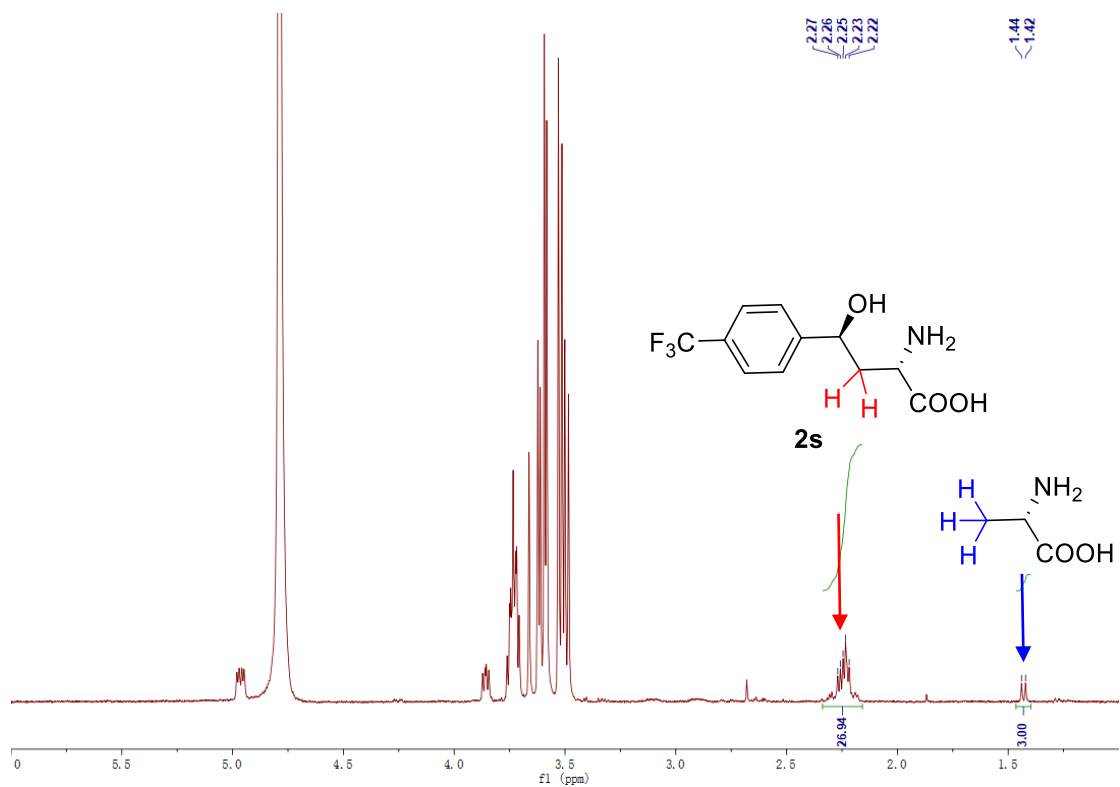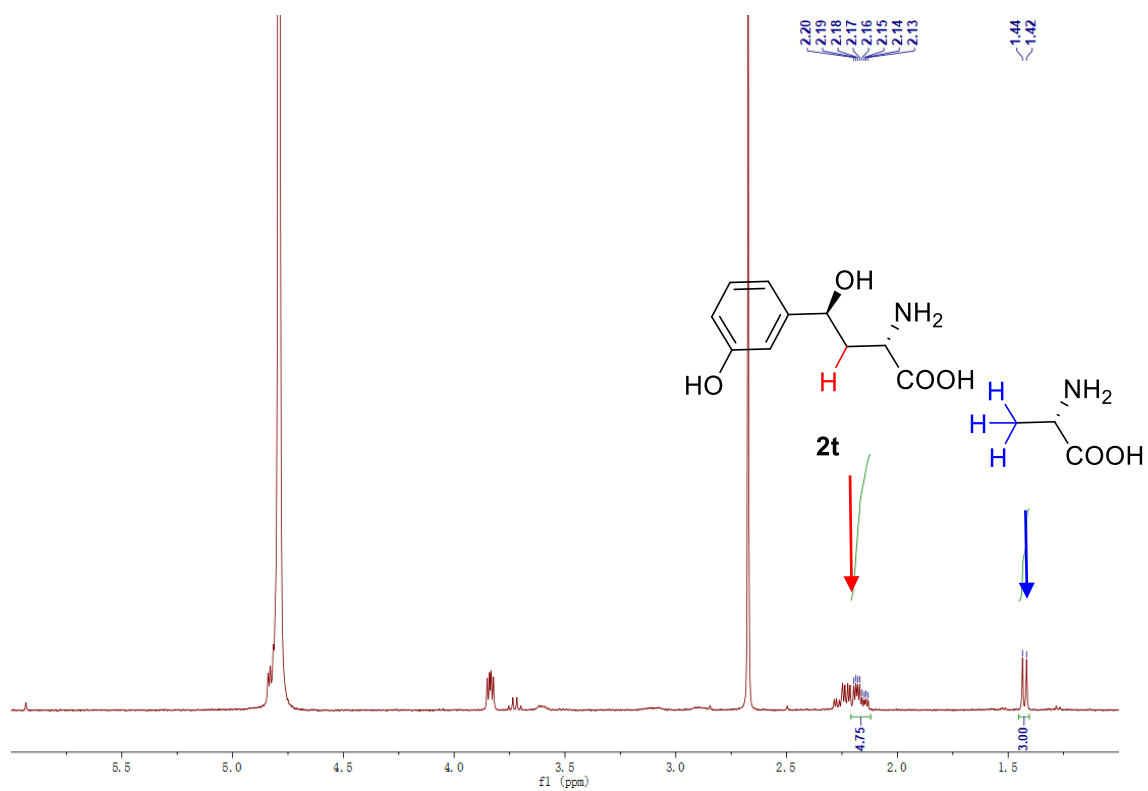

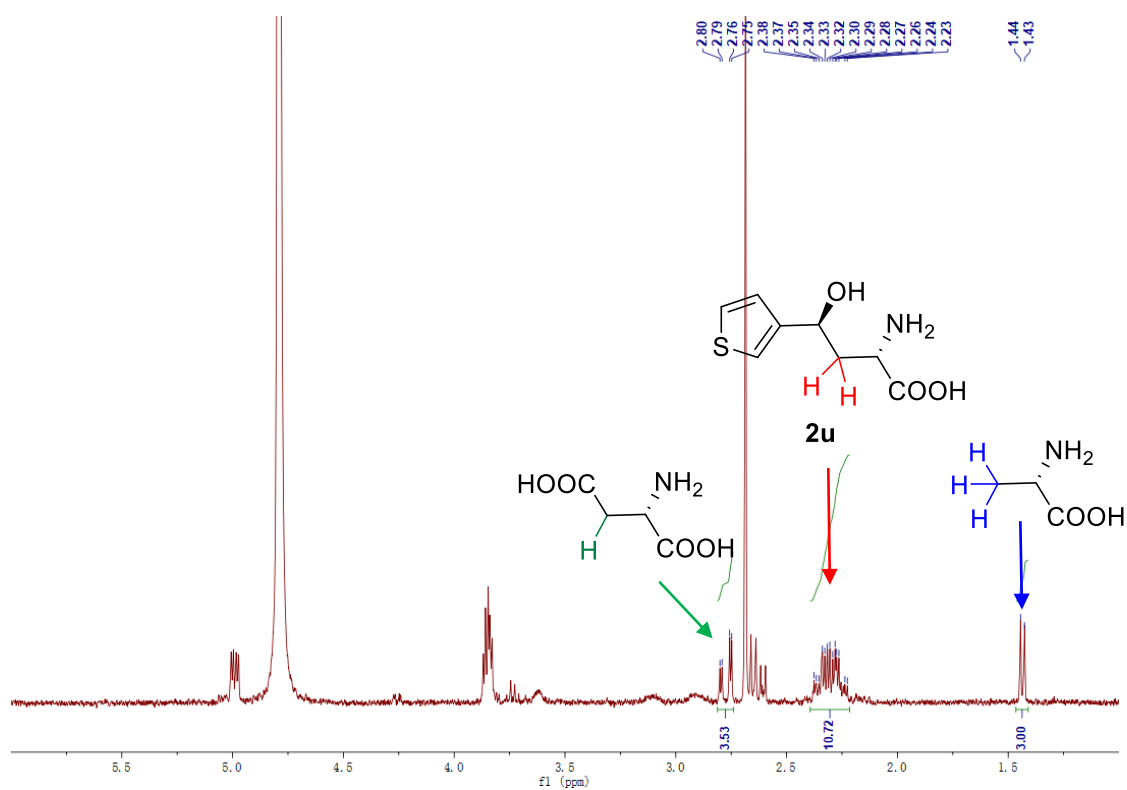

**Figure S27.** Conversion of **2u**

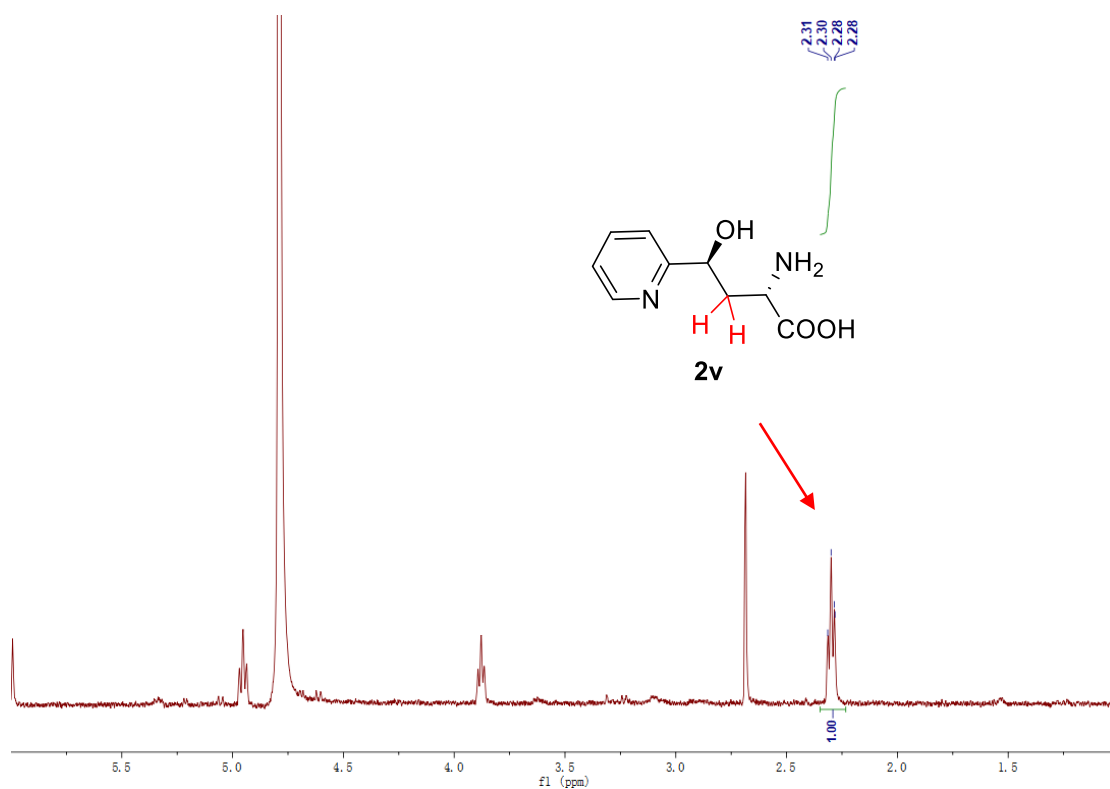

**Figure S28.** Conversion of **2v**



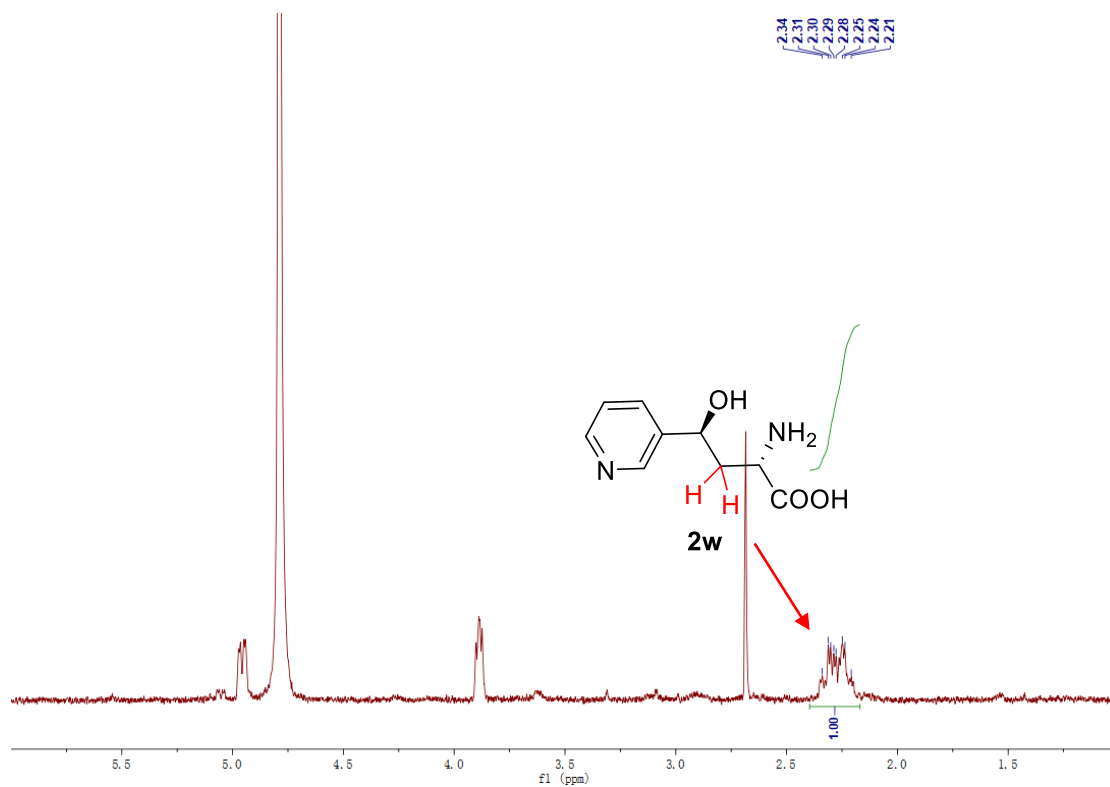

**Figure S29.** Conversion of **2w**

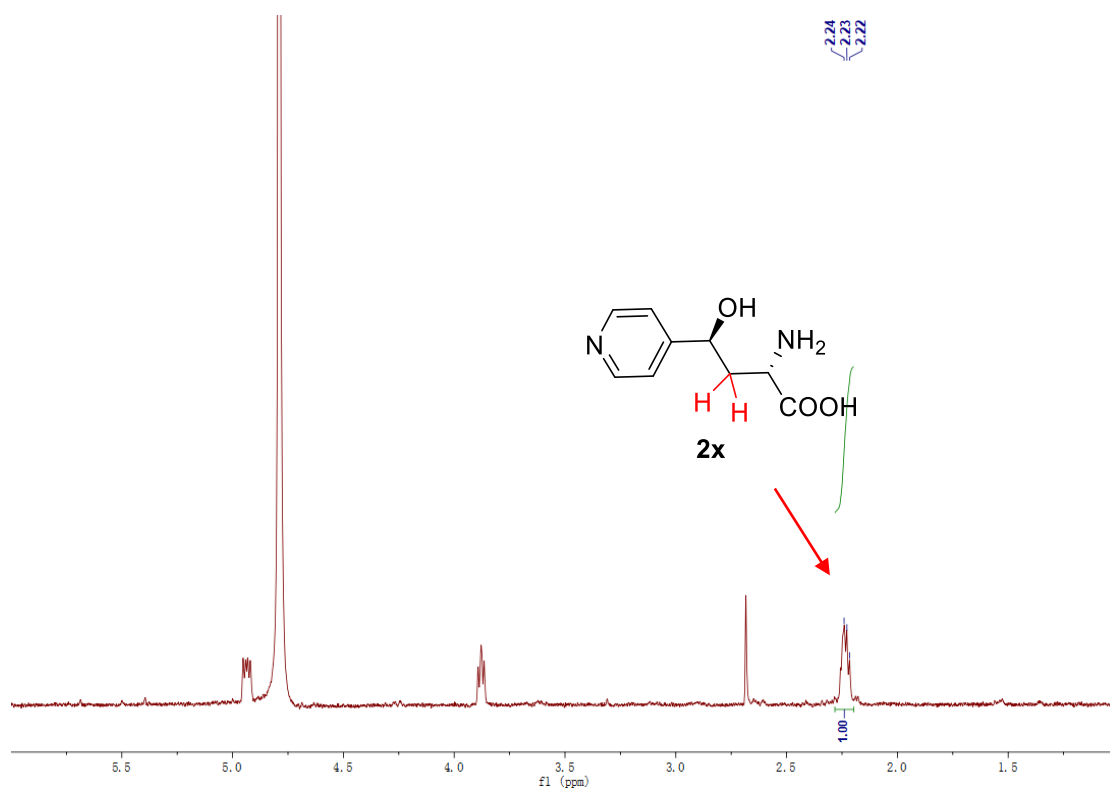

**Figure S30.** Conversion of **2x**

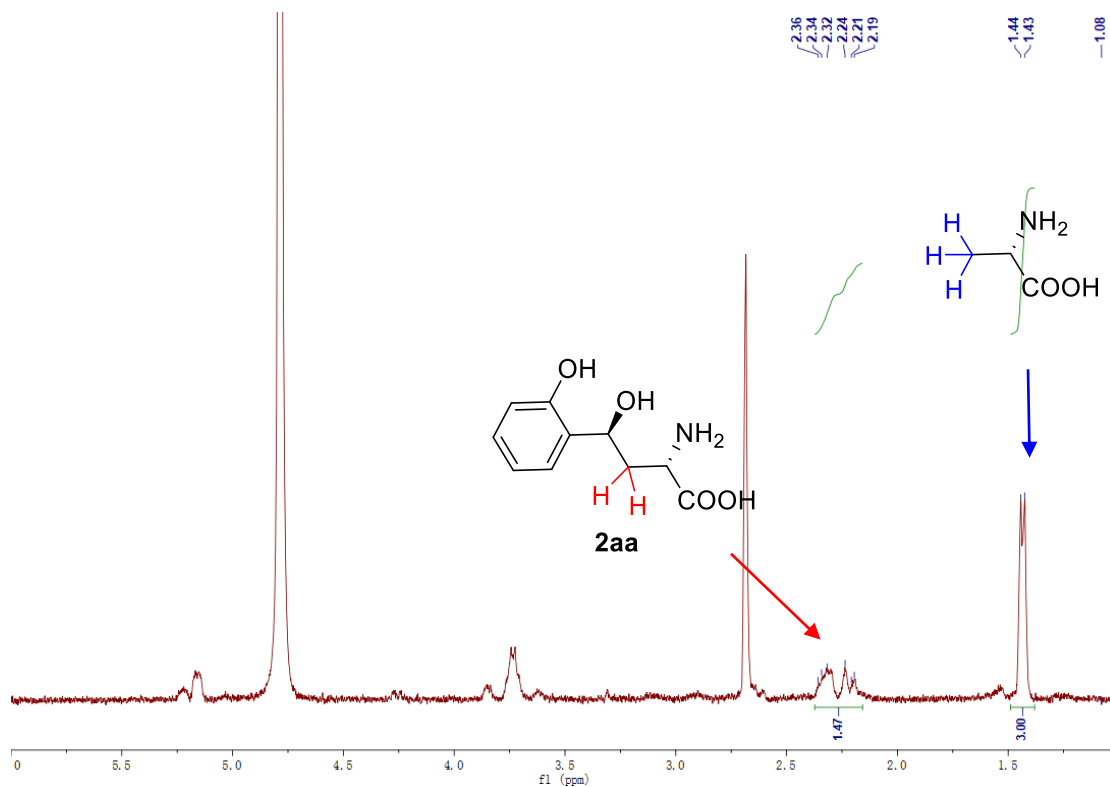

**Figure S31.** Conversion of **2aa**

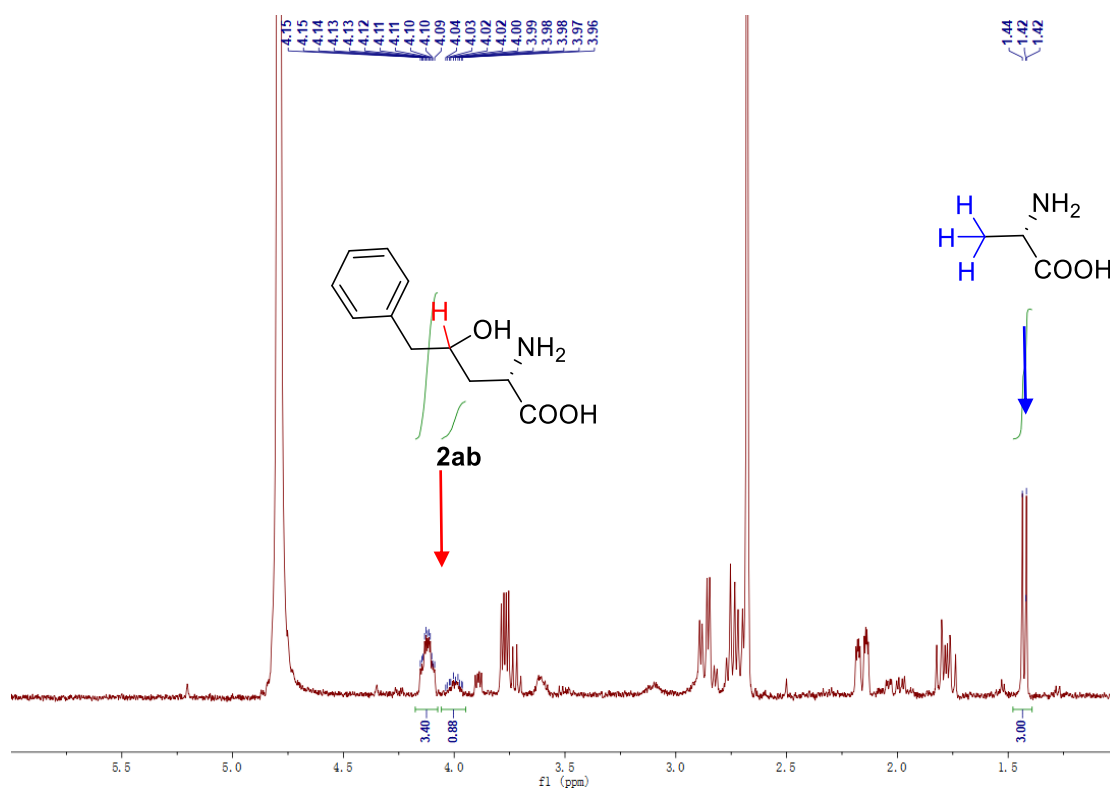

**Figure S32.** Conversion of **2ab**

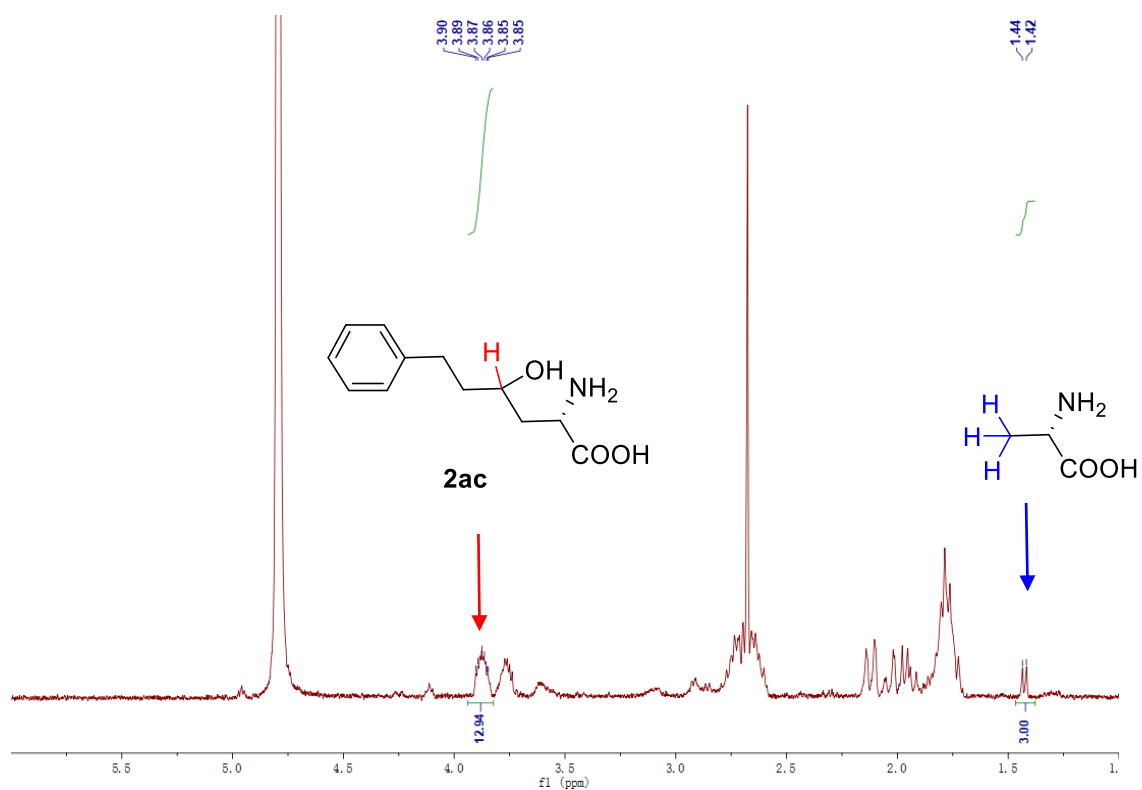

**Figure S33. Conversion of 2ac**

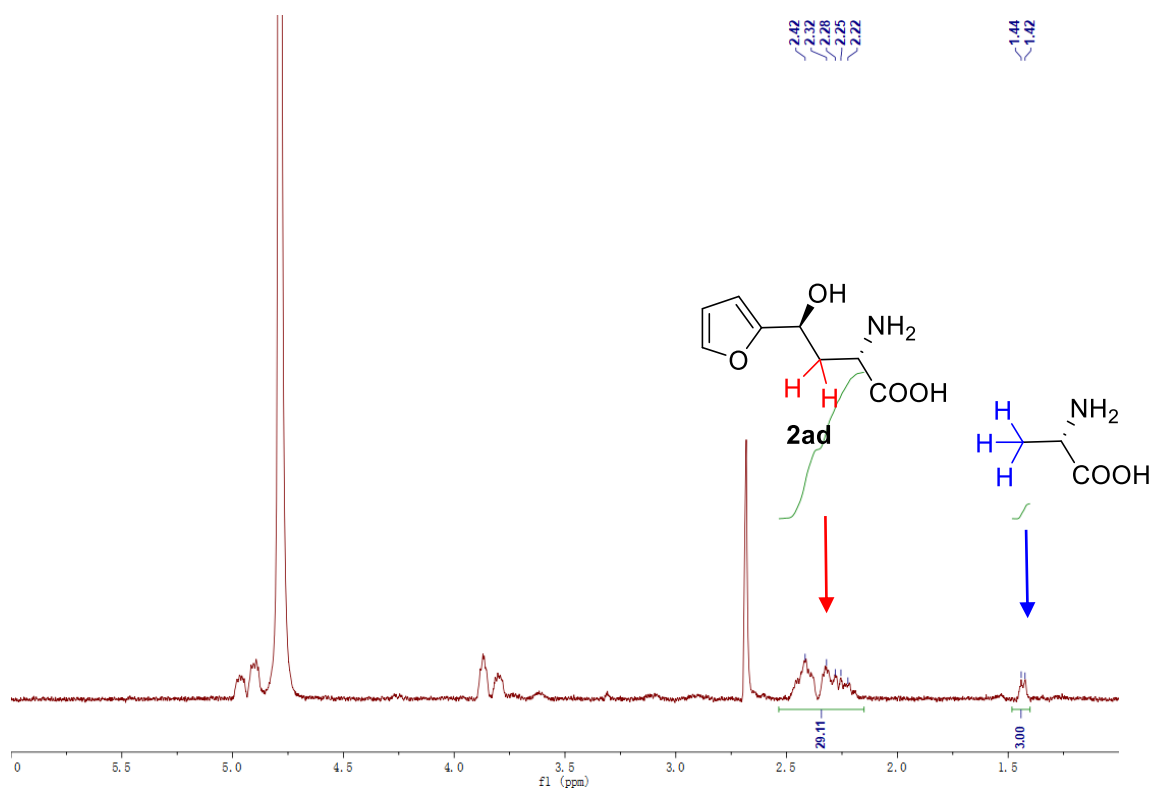

**Figure S34. Conversion of 2ad**

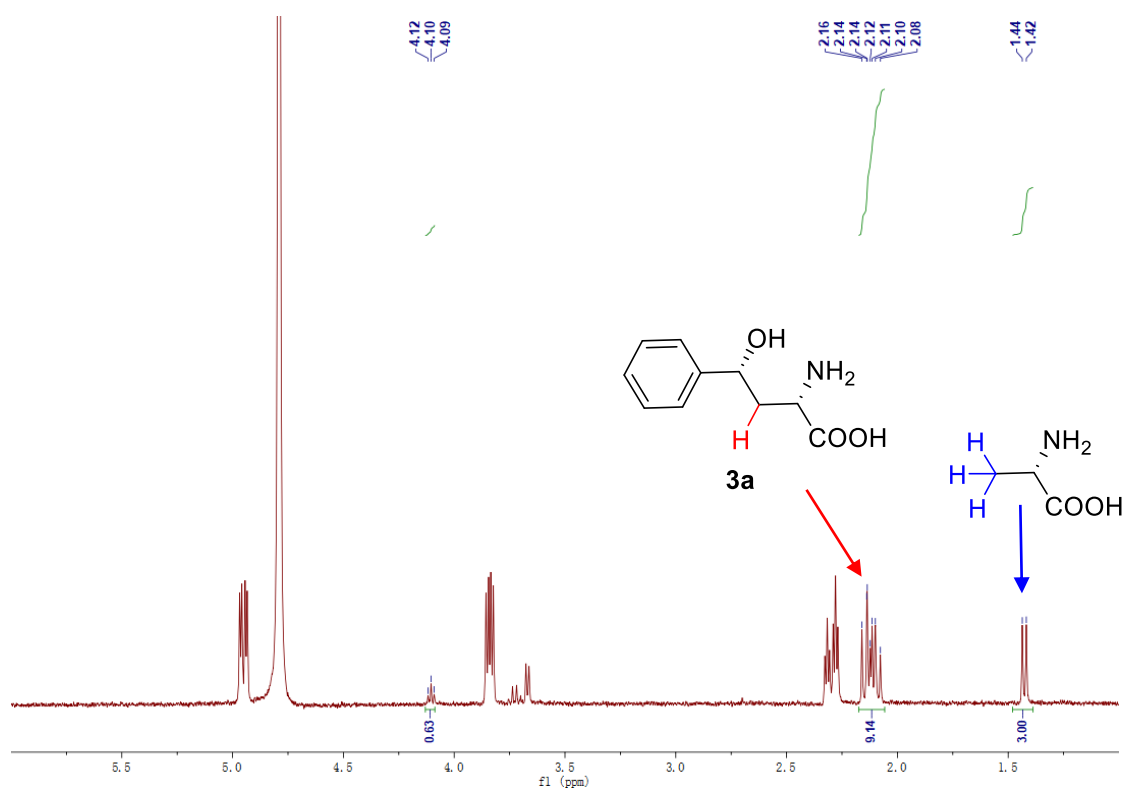

**Figure S35.** Conversion of **3a**

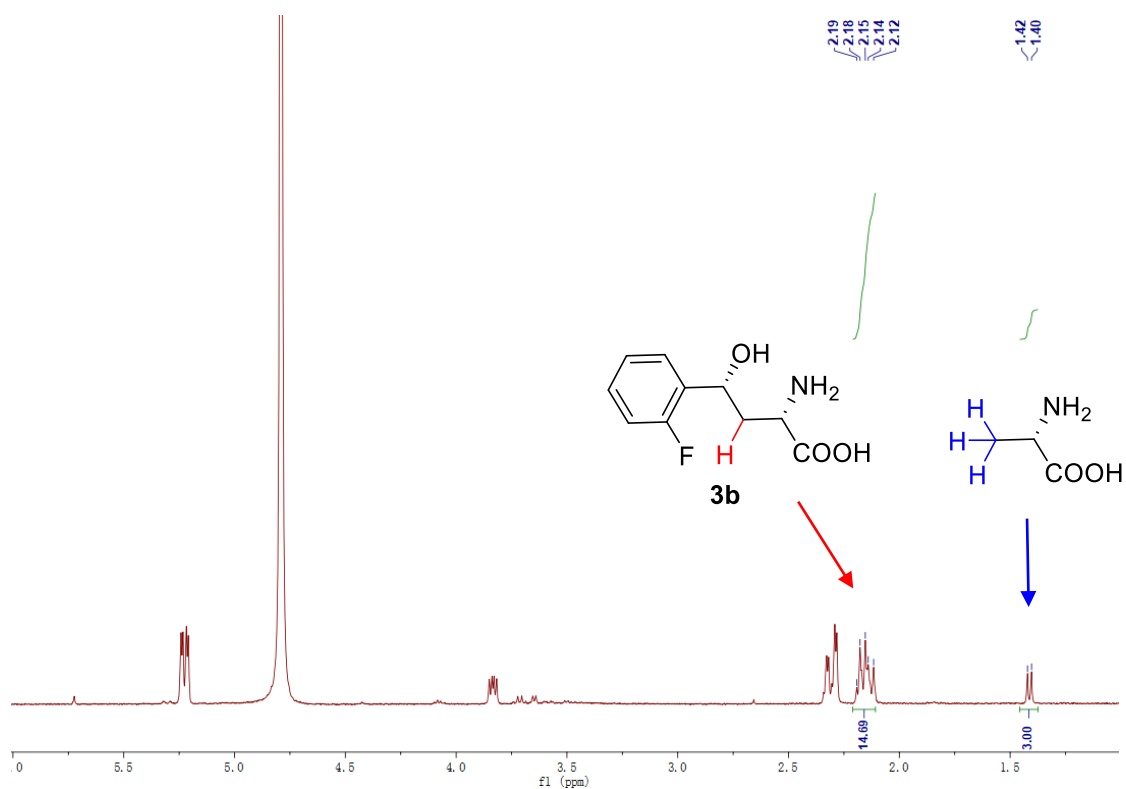

**Figure S36.** Conversion of **3b**

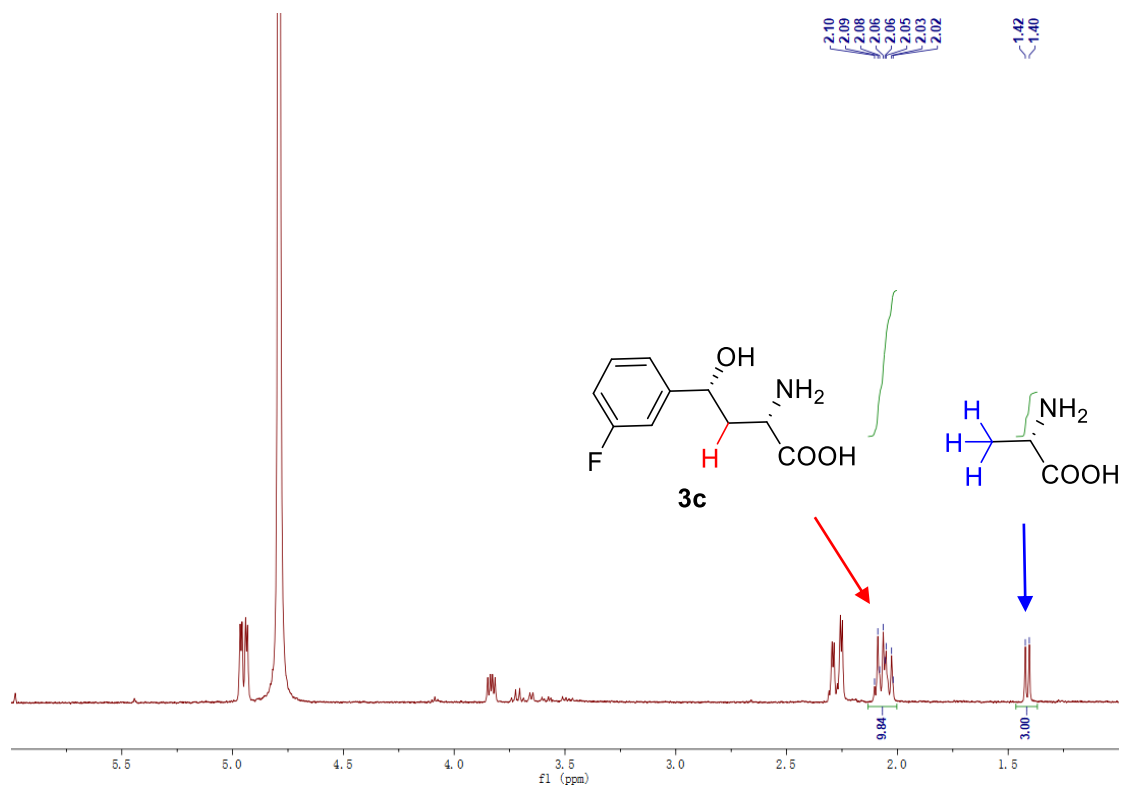

**Figure S37.** Conversion of **3c**

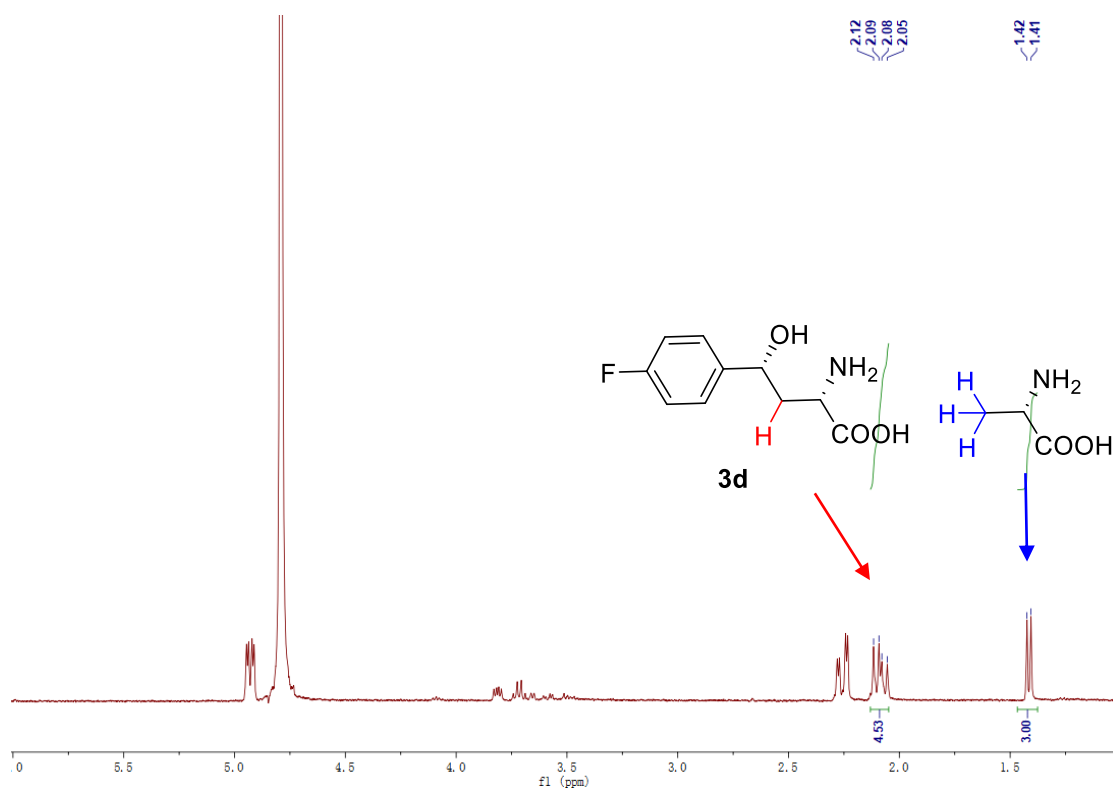

**Figure S38.** Conversion of **3d**

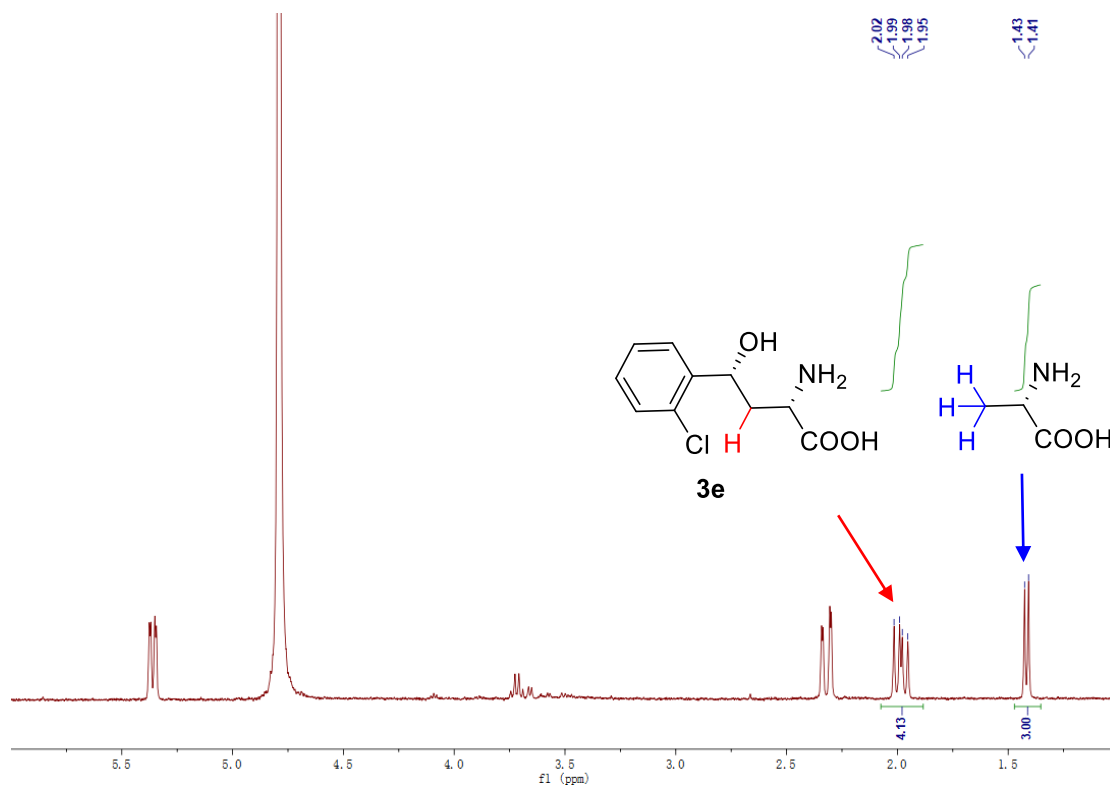

**Figure S39.** Conversion of **3e**

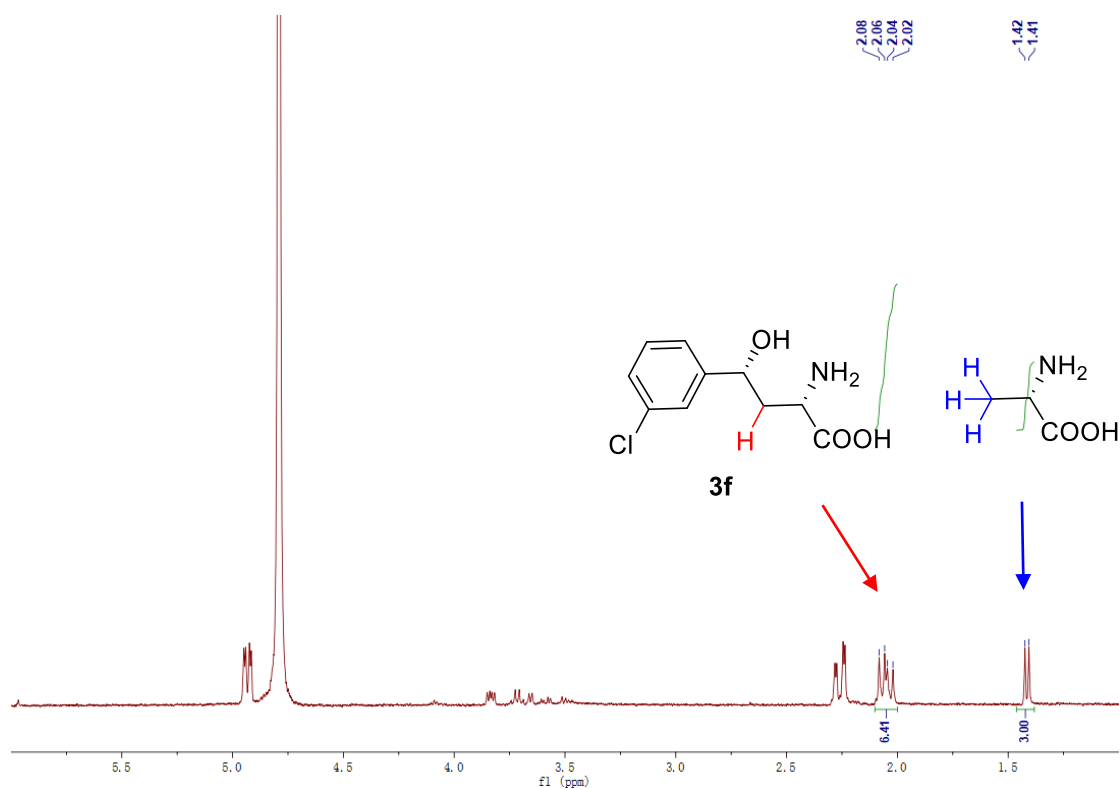

**Figure S40.** Conversion of **3f**

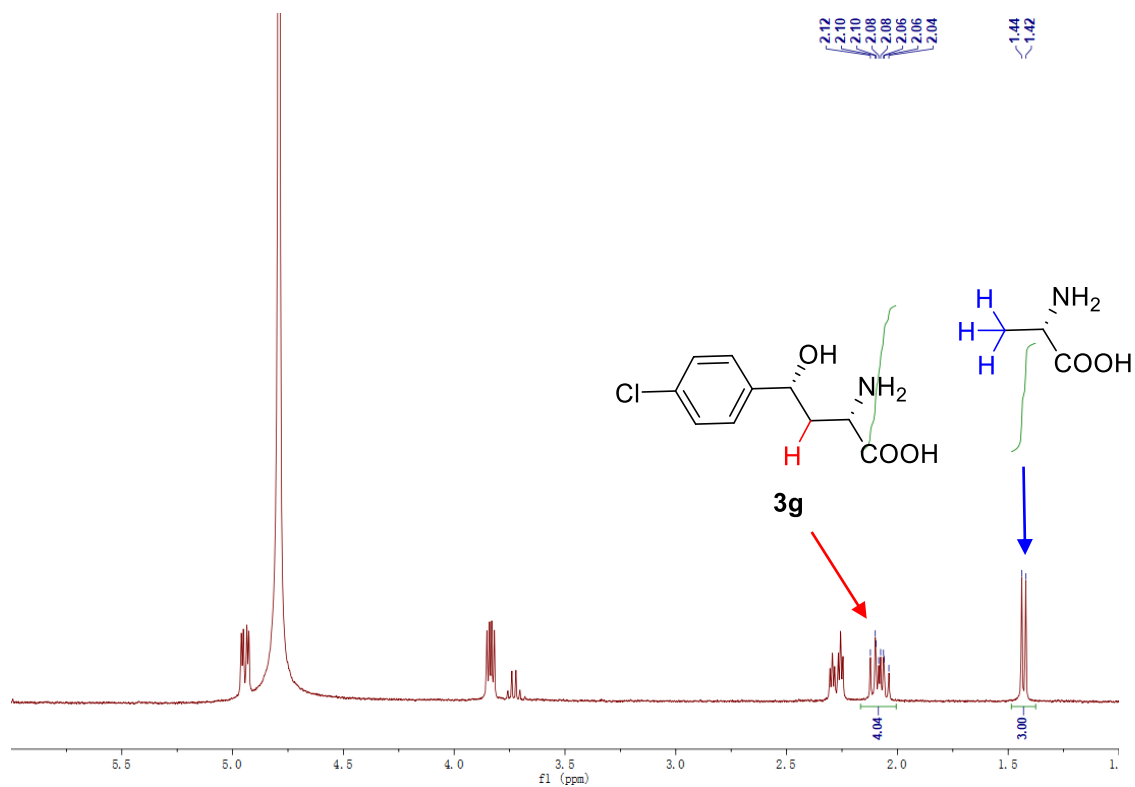

**Figure S41.** Conversion of **3g**

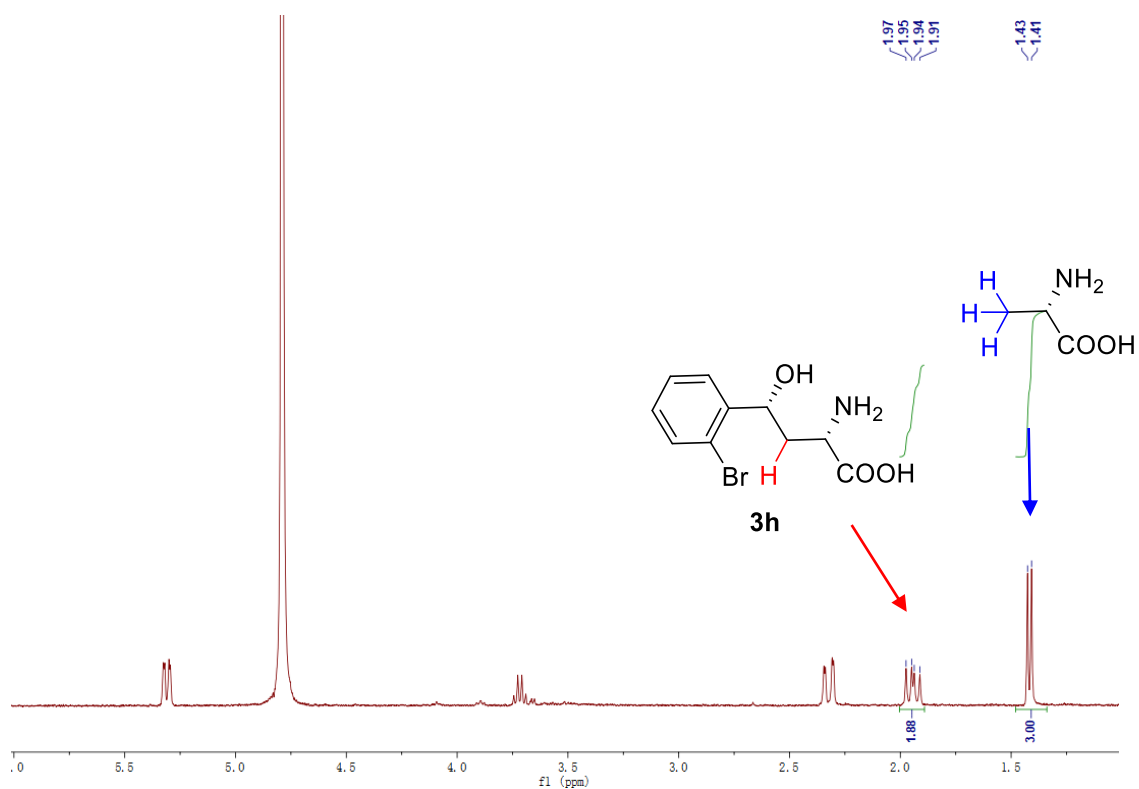

**Figure S42.** Conversion of **3h**

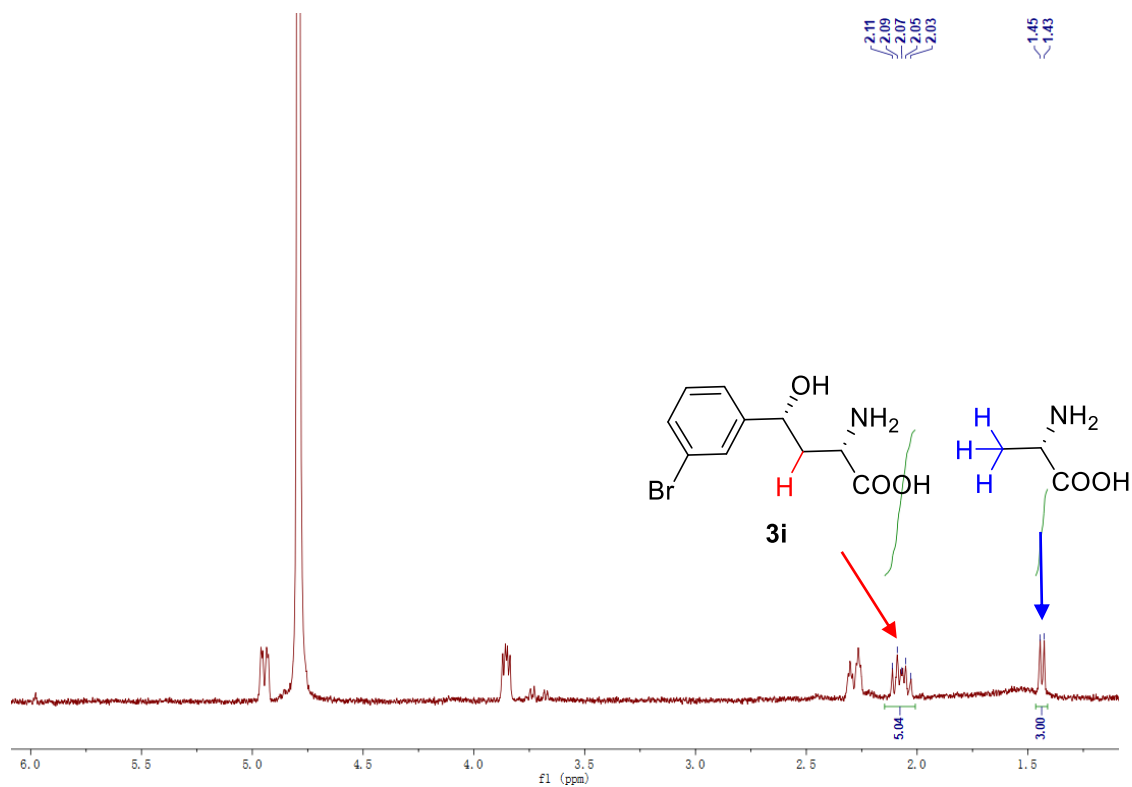

**Figure S43.** Conversion of **3i**

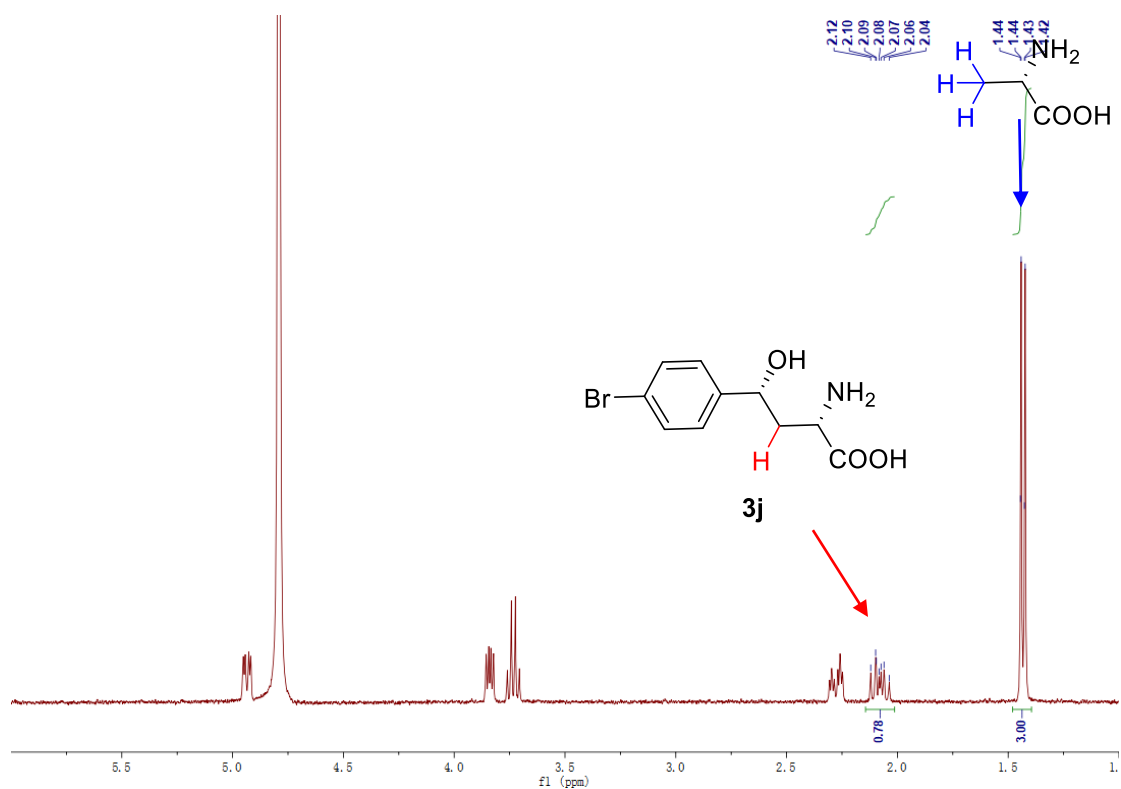

**Figure S44.** Conversion of **3j**



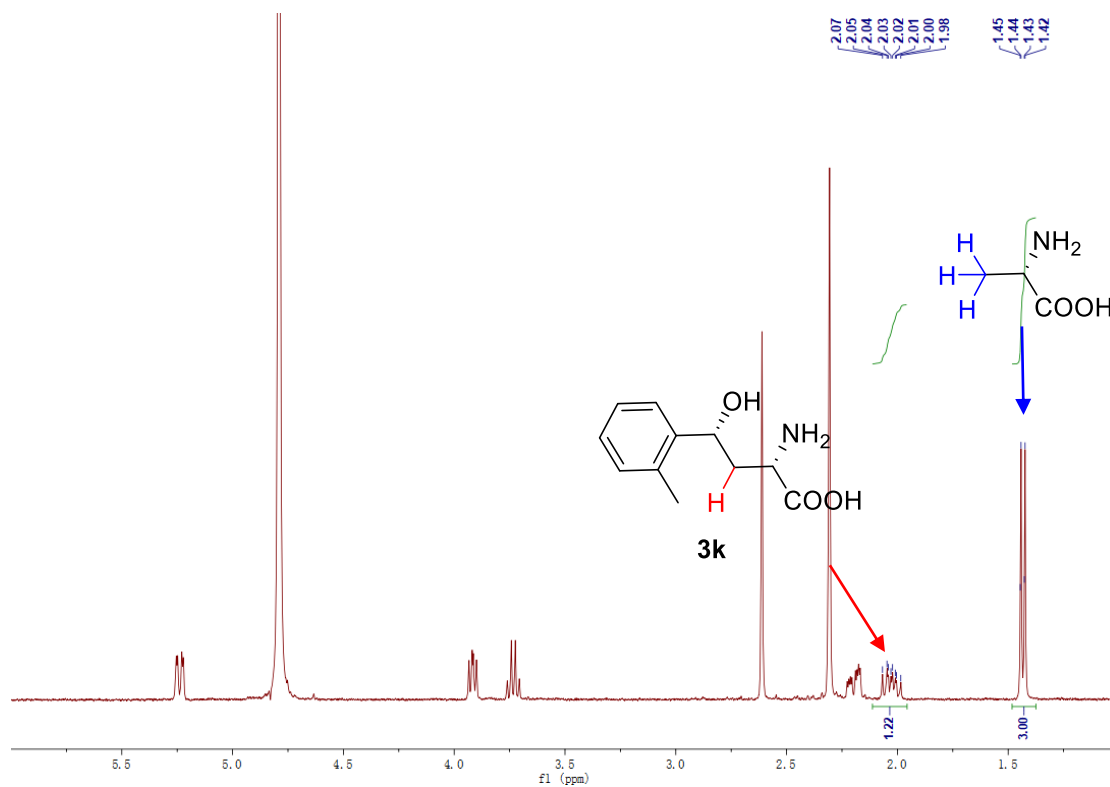

**Figure S45.** Conversion of **3k**

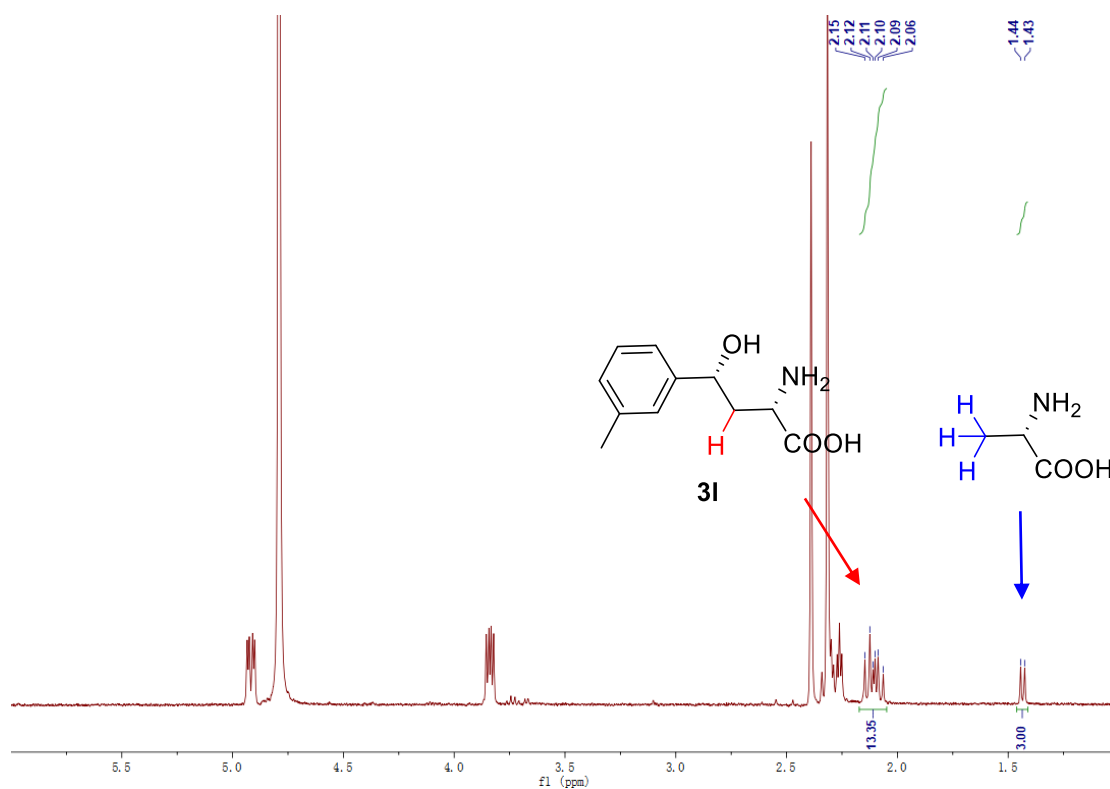

**Figure S46.** Conversion of **3l**

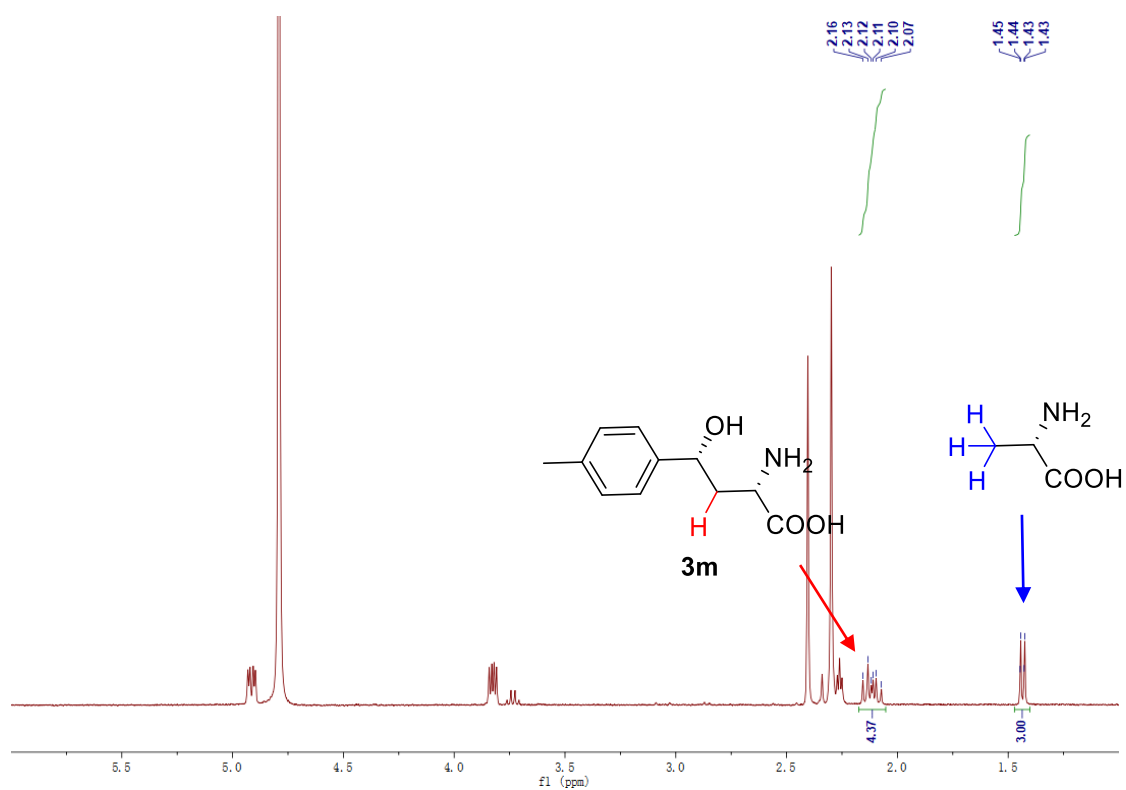

**Figure S47.** Conversion of **3m**

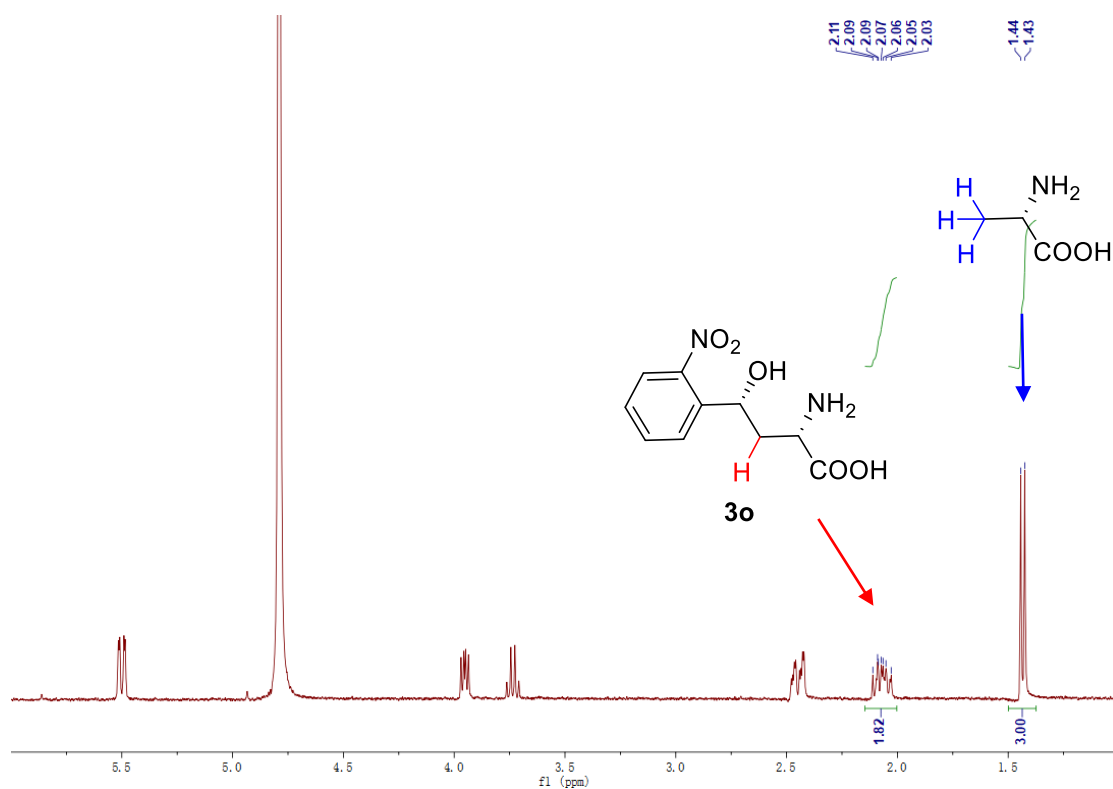

**Figure S48.** Conversion of **3o**

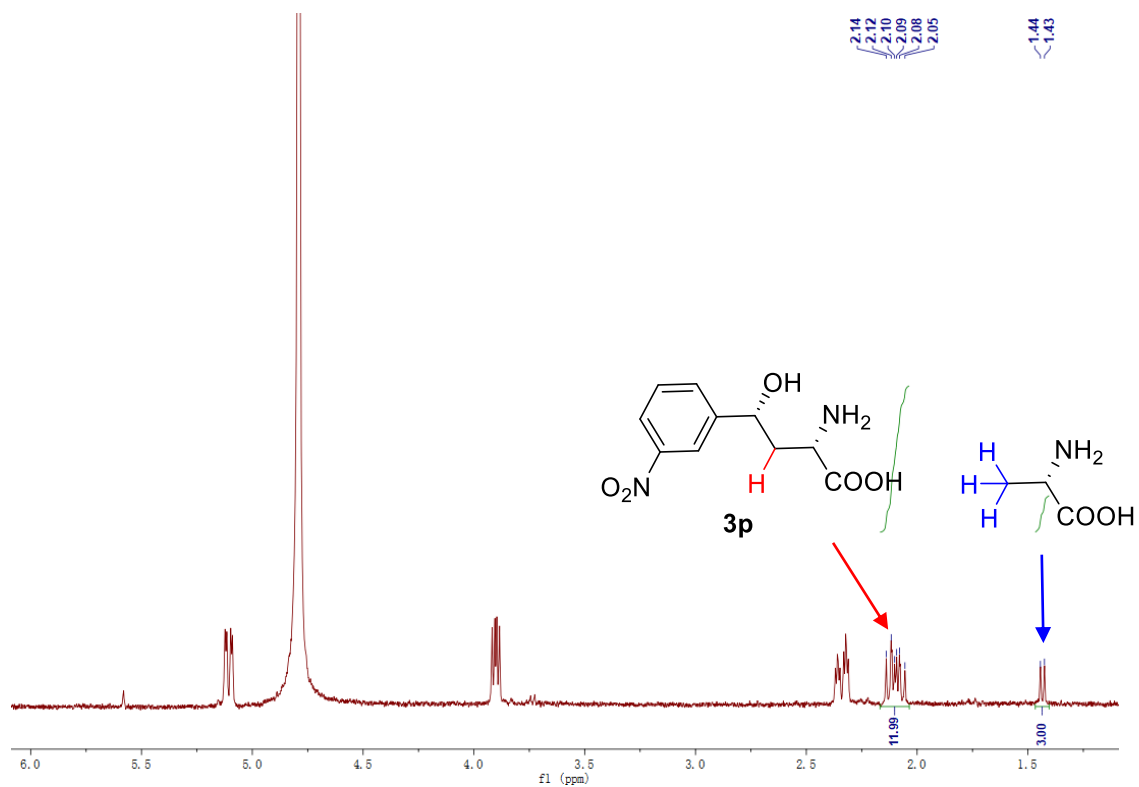

**Figure S49.** Conversion of **3p**

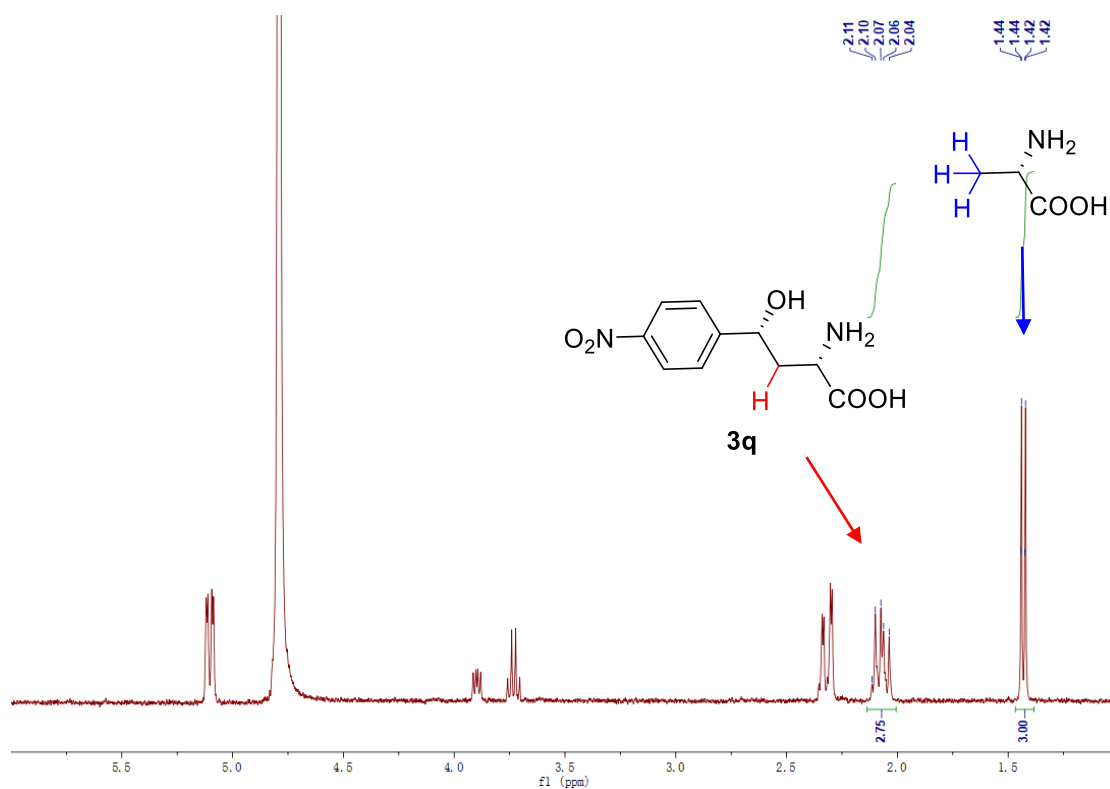

**Figure S50.** Conversion of **3q**

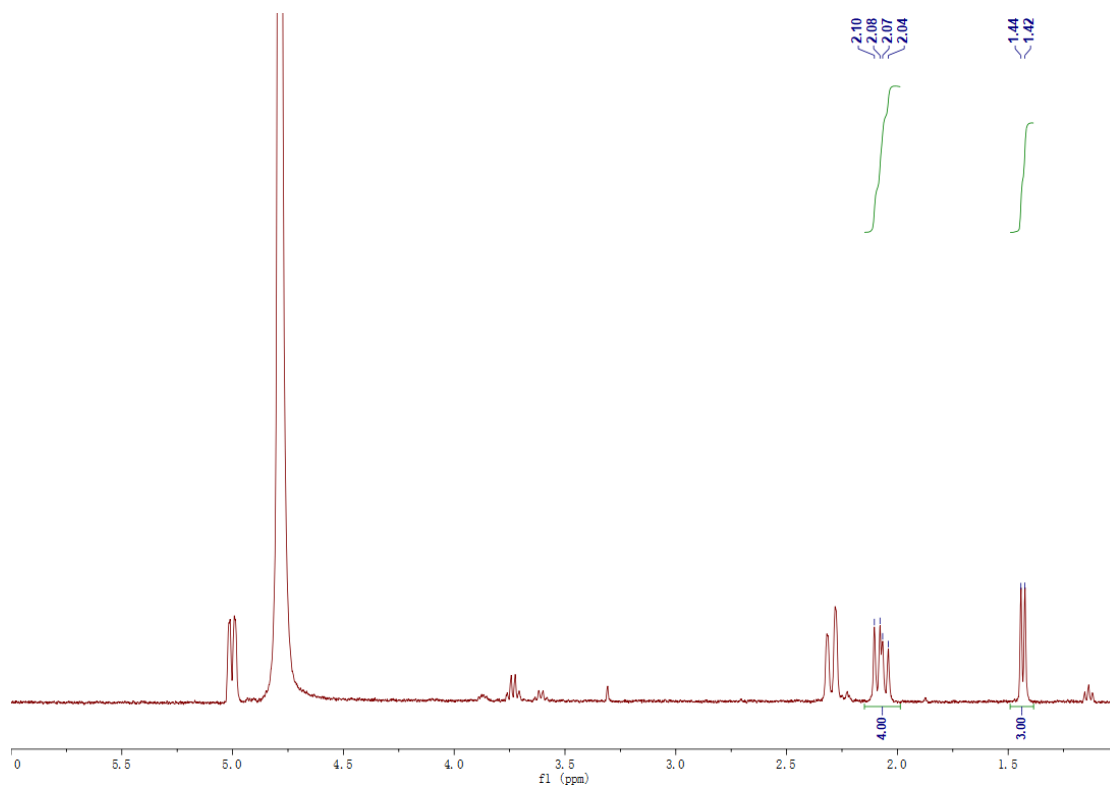

**Figure S51.** Conversion of **3r**

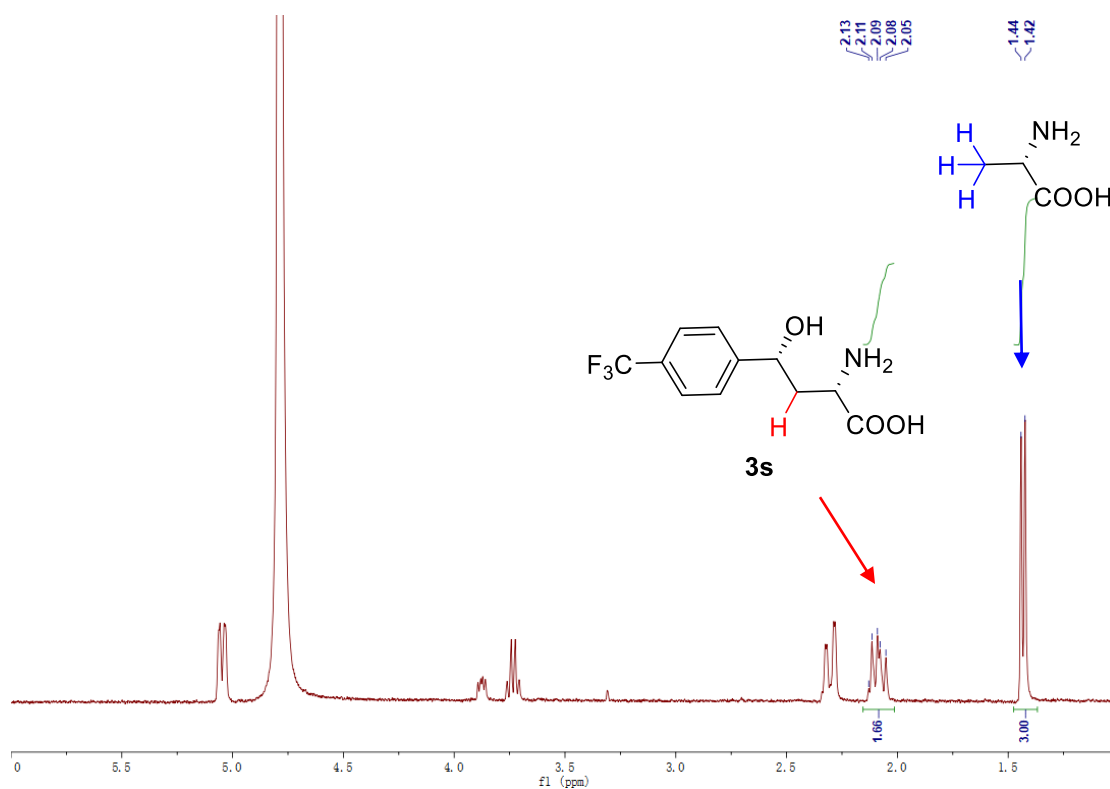

**Figure S52.** Conversion of **3s**

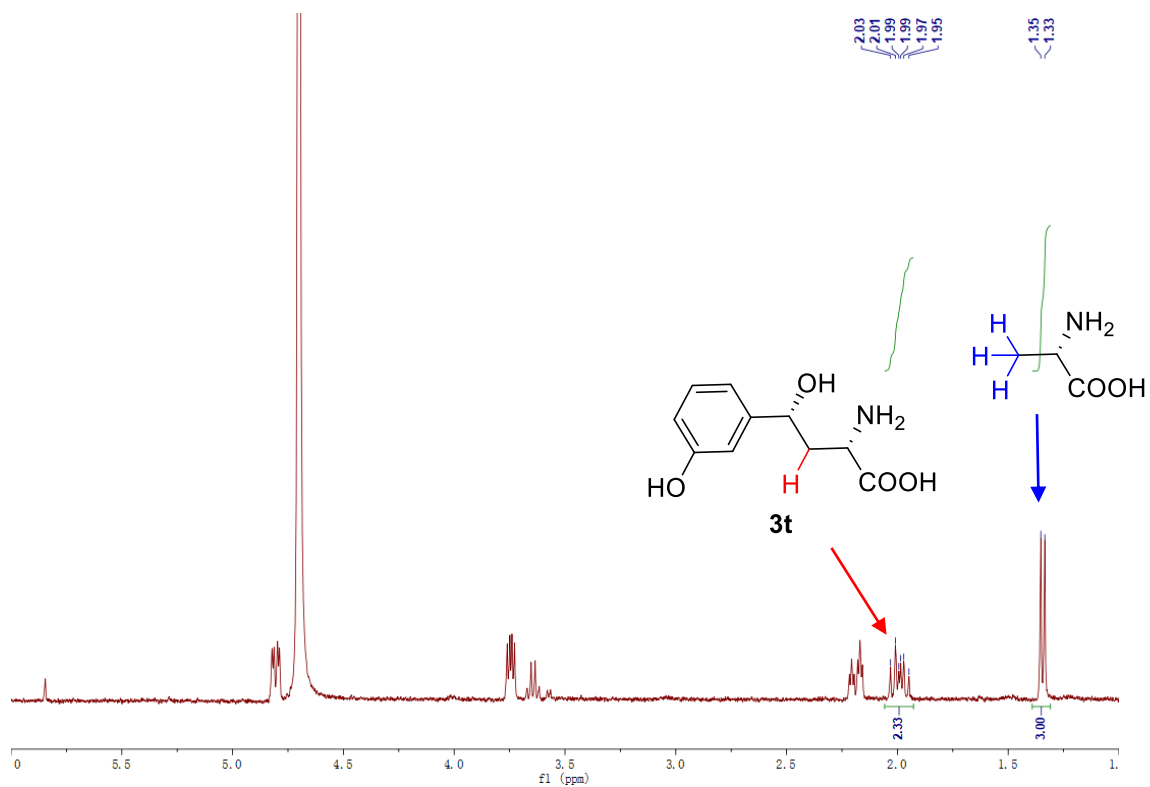

**Figure S53.** Conversion of **3t**

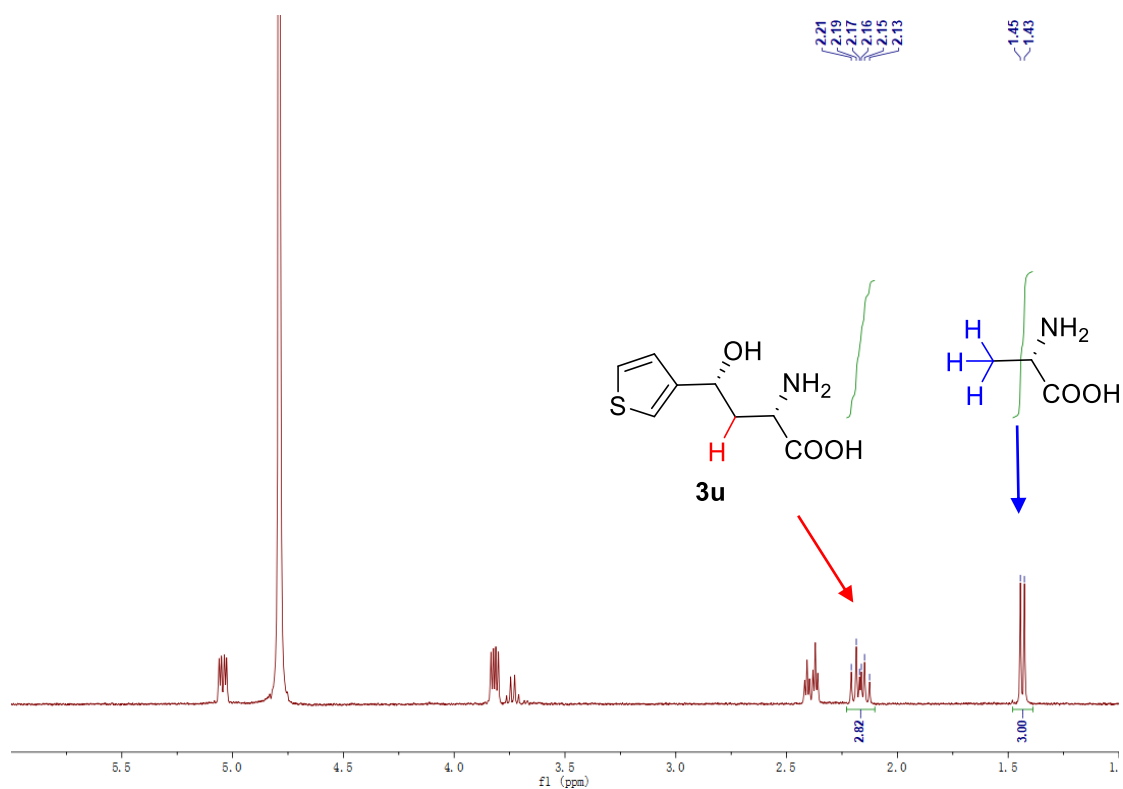

**Figure S54.** Conversion of **3u**

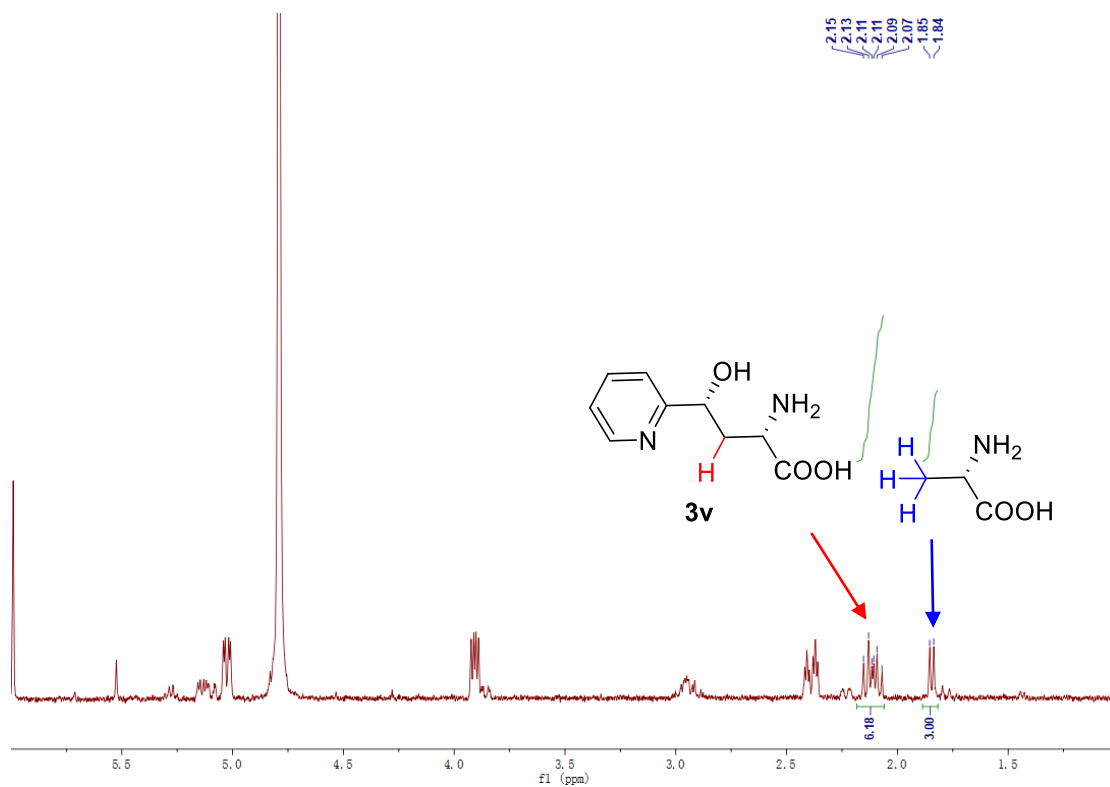

**Figure S55.** Conversion of **3v**

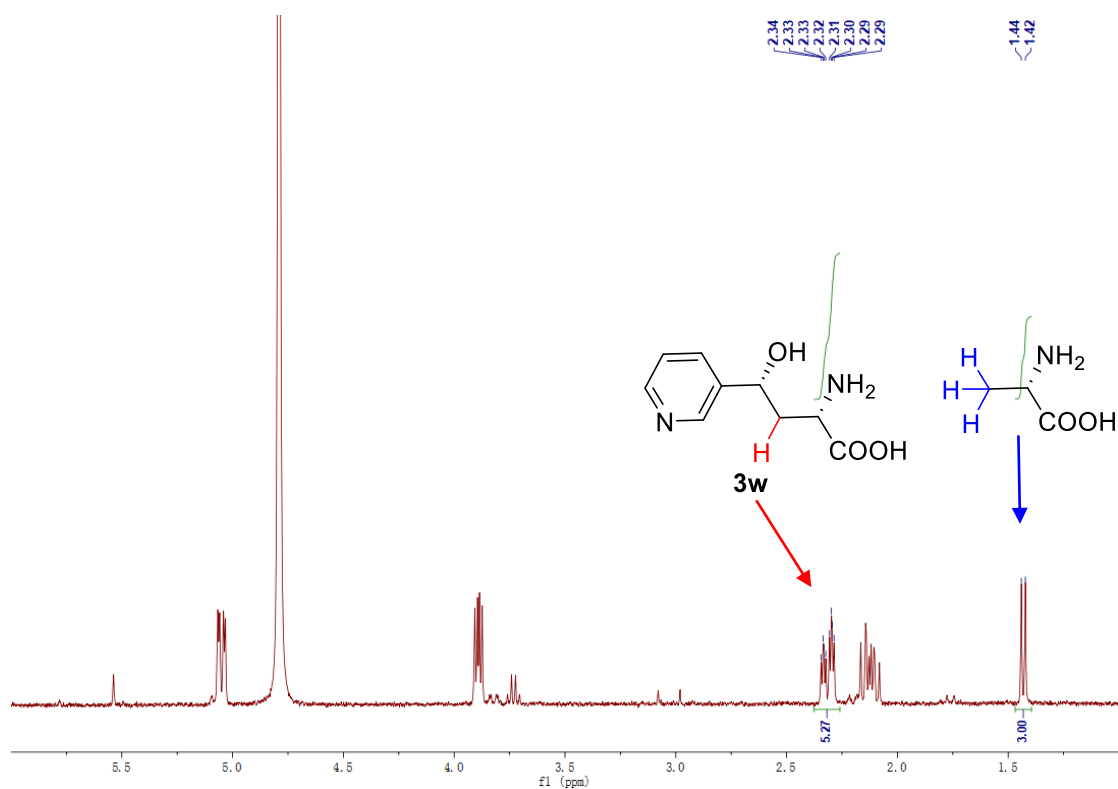

**Figure S56.** Conversion of **3w**

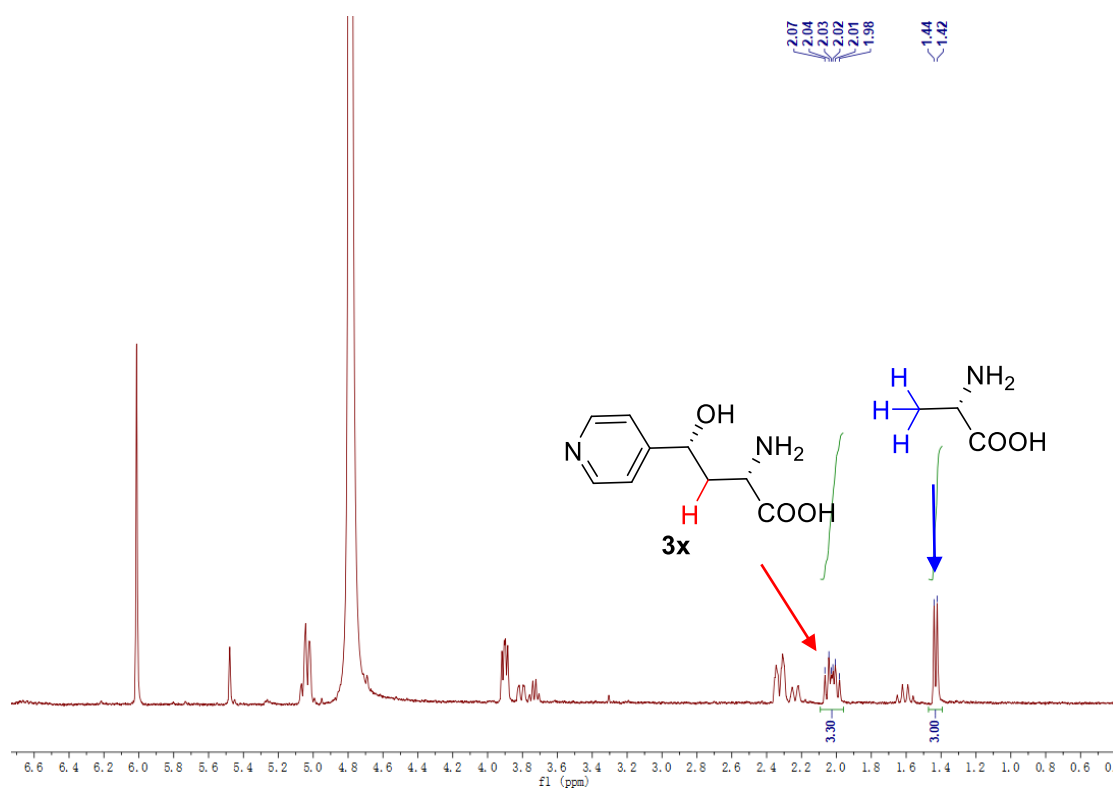

**Figure S57.** Conversion of **3x**

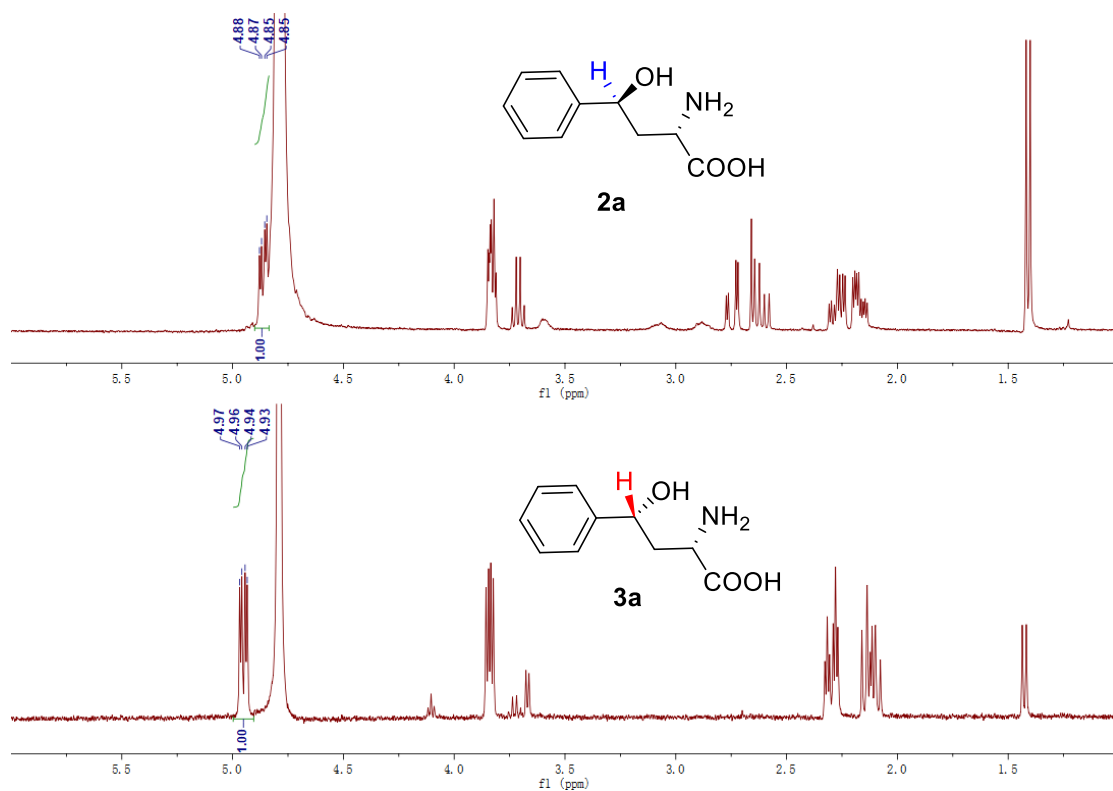

**Figure S58.** Diastereoisomeric ratio of **2a** and **3a**

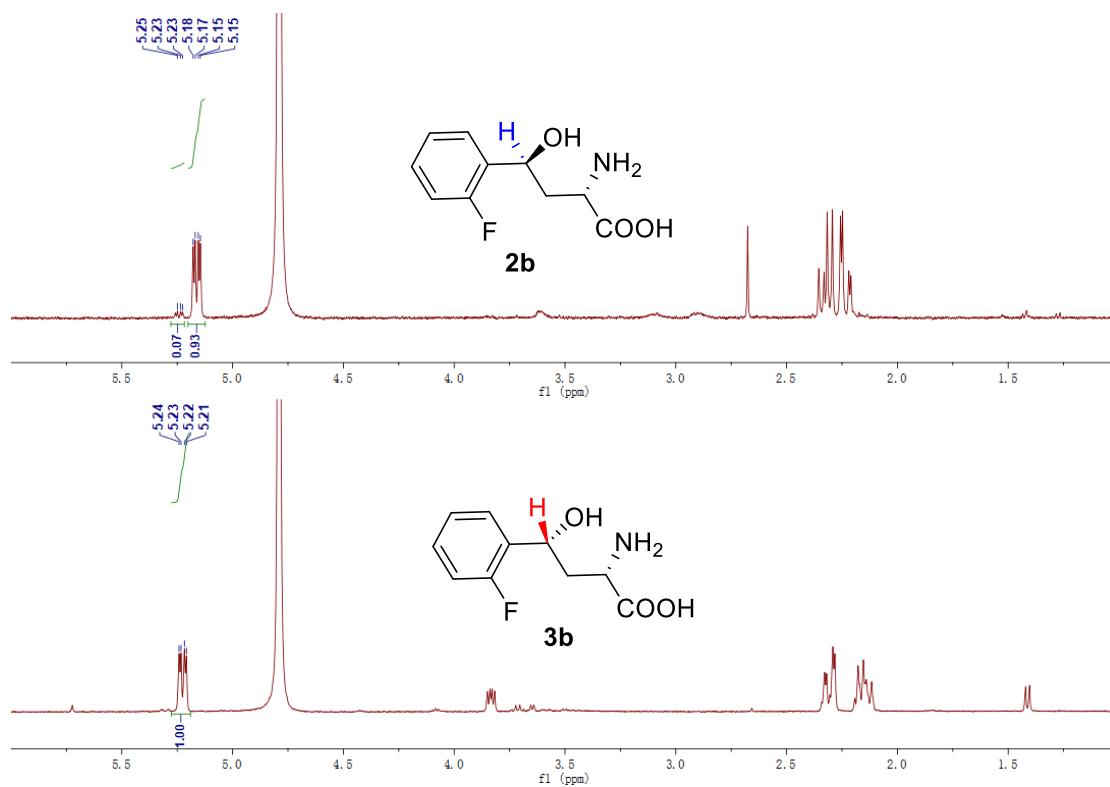

**Figure S59.** Diastereoisomeric ratio of **2b** and **3b**

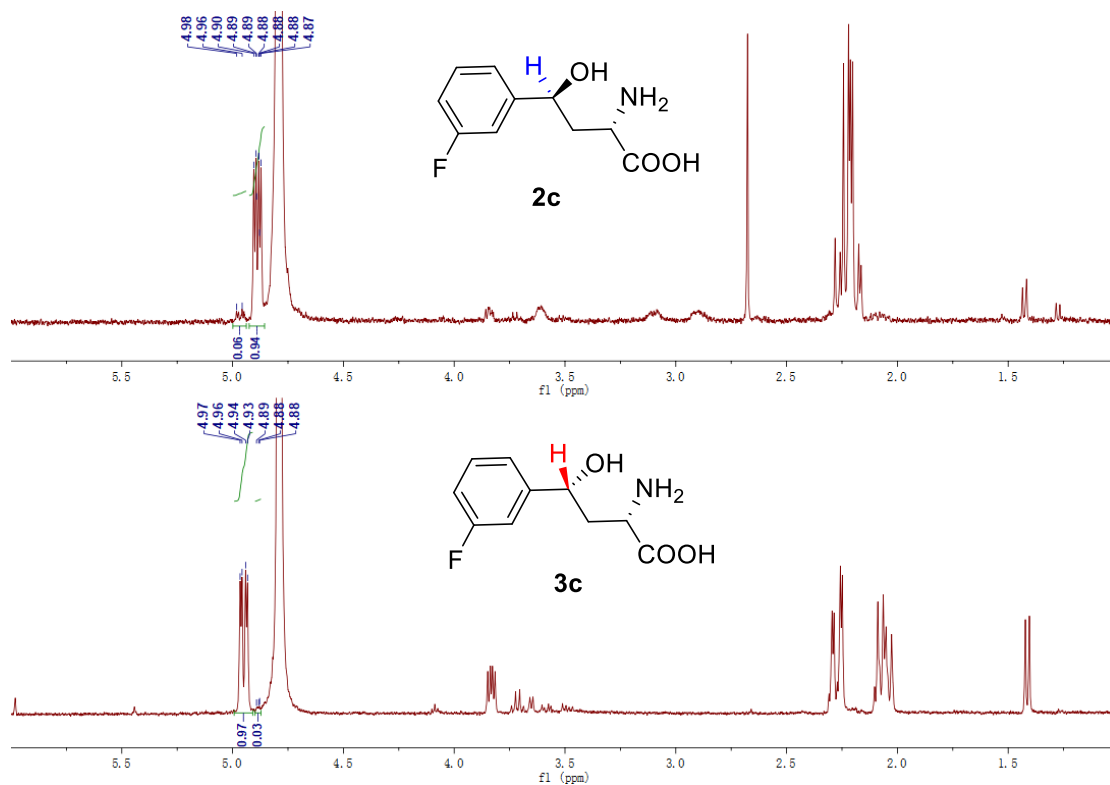

**Figure S60.** Diastereoisomeric ratio of **2c** and **3c**



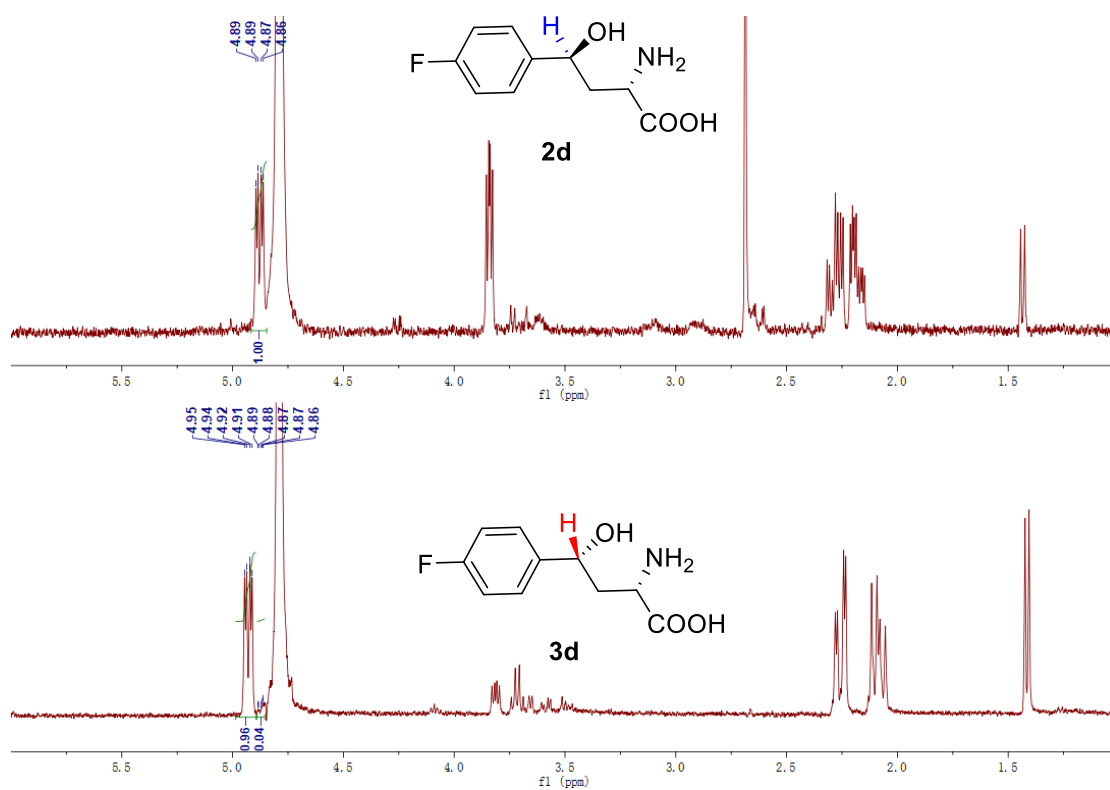

**Figure S61.** Diastereoisomeric ratio of **2d** and **3d**

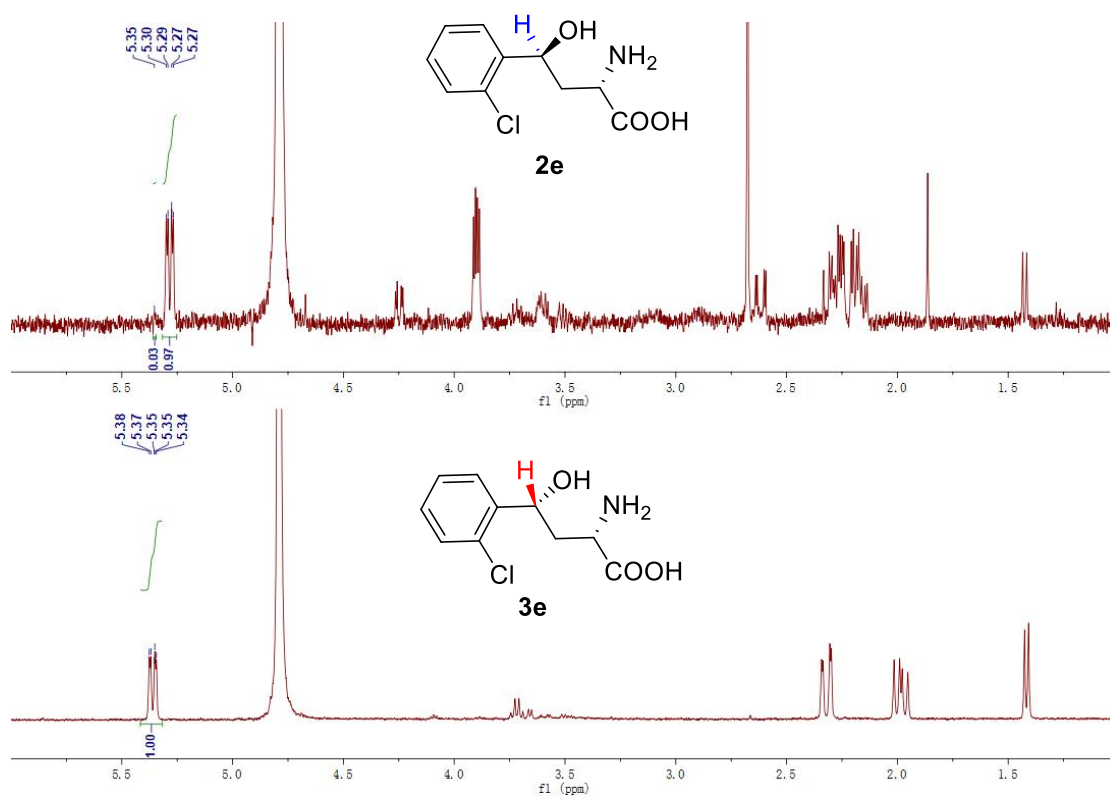

**Figure S62.** Diastereoisomeric ratio of **2e** and **3e**

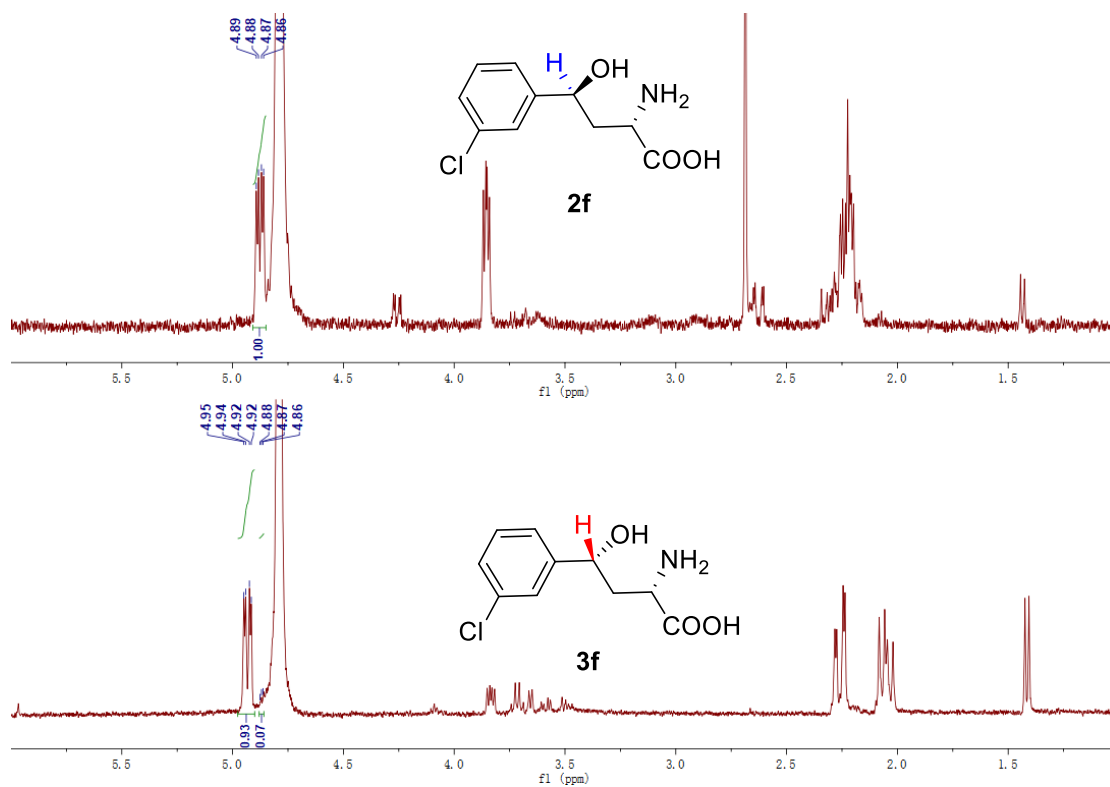

**Figure S63.** Diastereoisomeric ratio of **2f** and **3f**

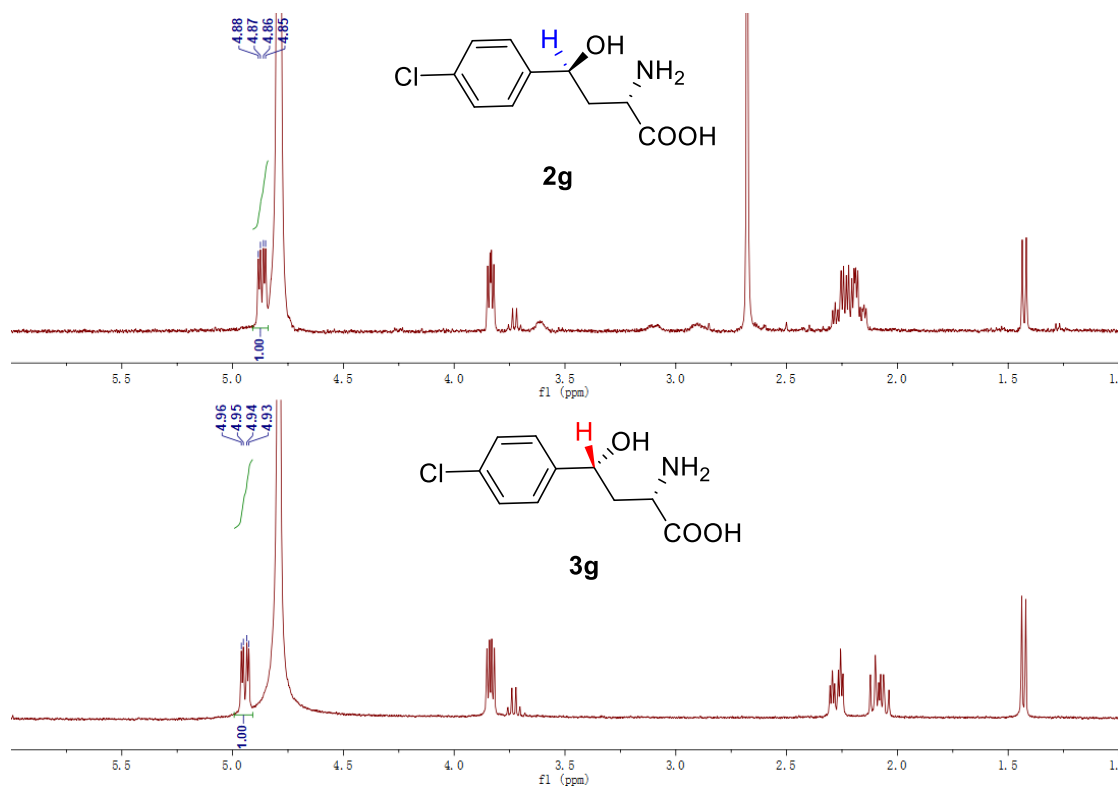

**Figure S64.** Diastereoisomeric ratio of **2g** and **3g**

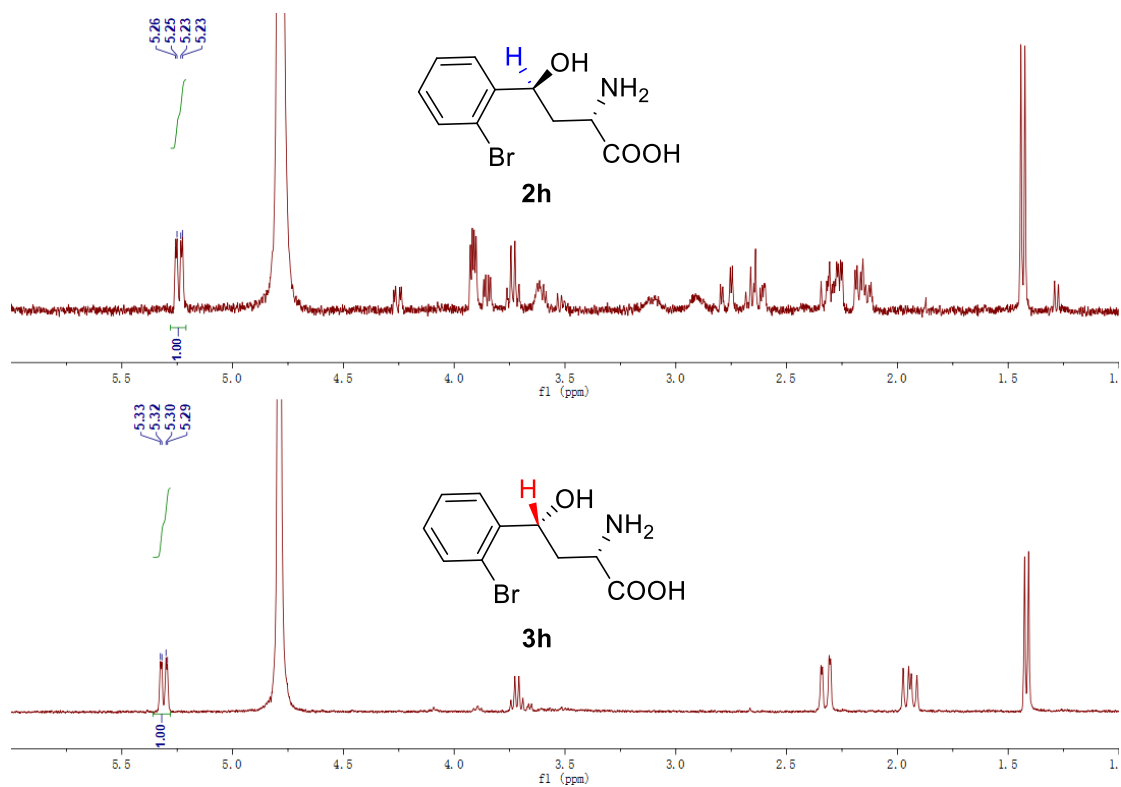

**Figure S65.** Diastereoisomeric ratio of **2h** and **3h**

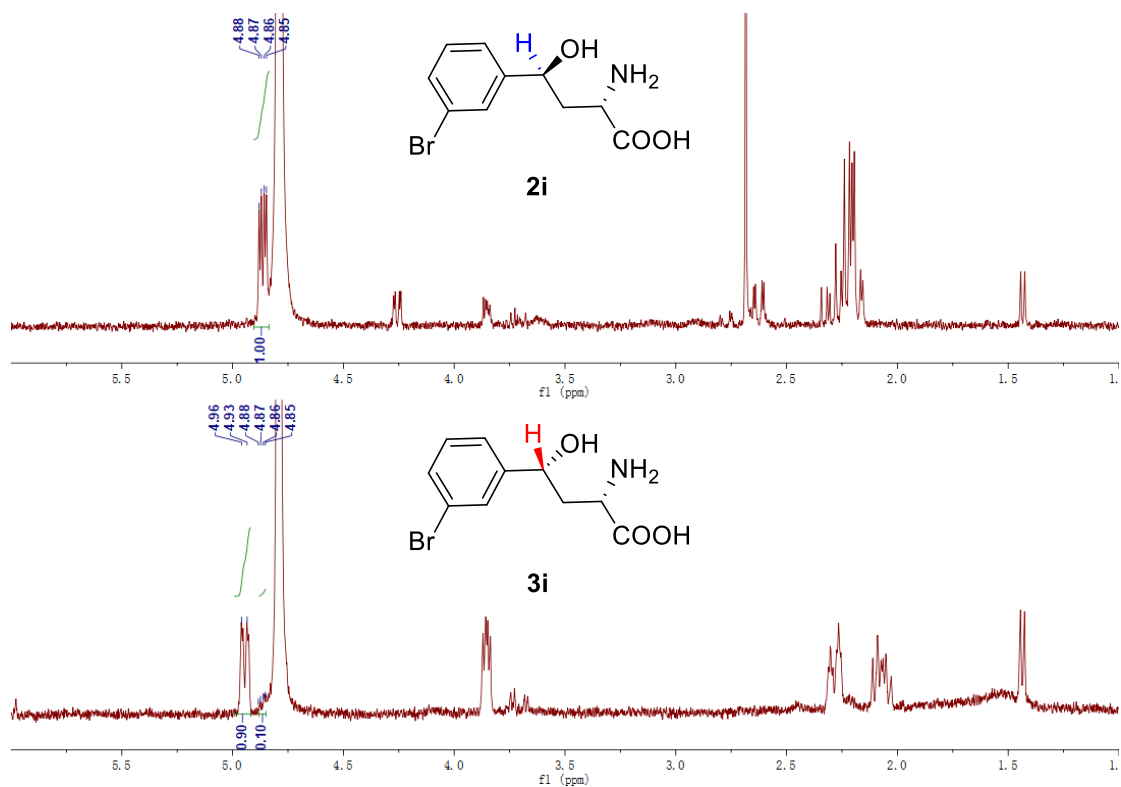

**Figure S66.** Diastereoisomeric ratio of **2i** and **3i**

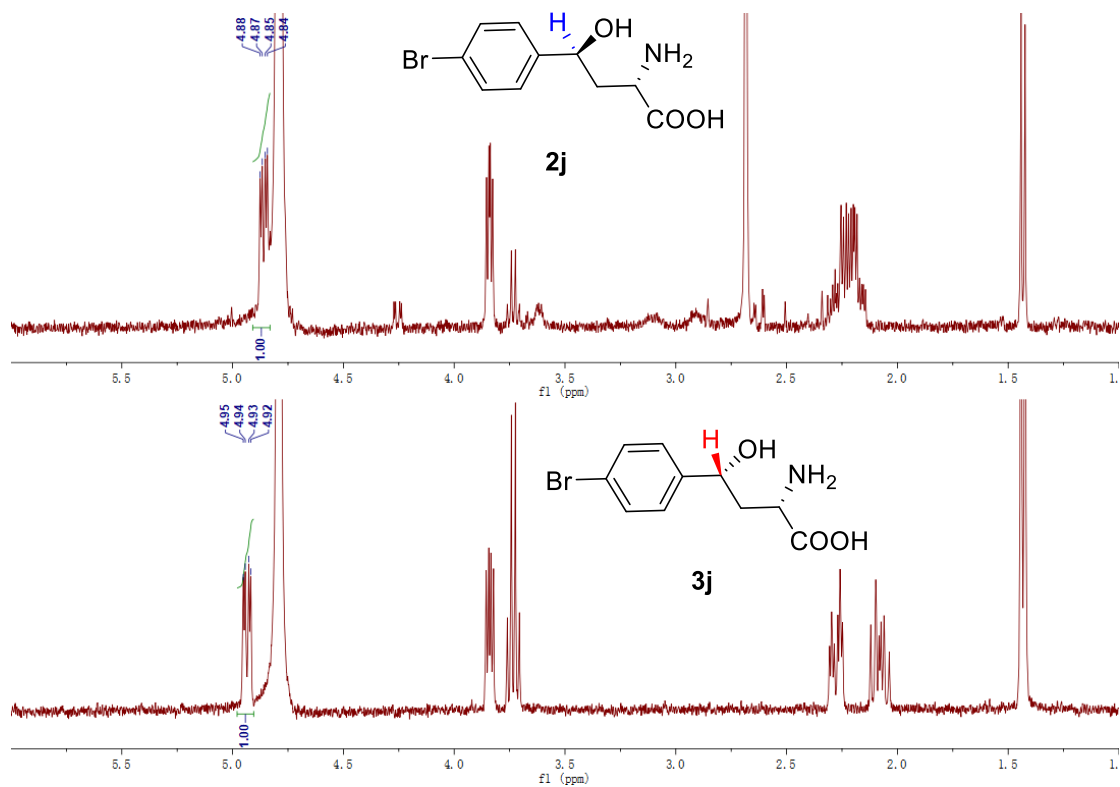

**Figure S67.** Diastereoisomeric ratio of **2j** and **3j**

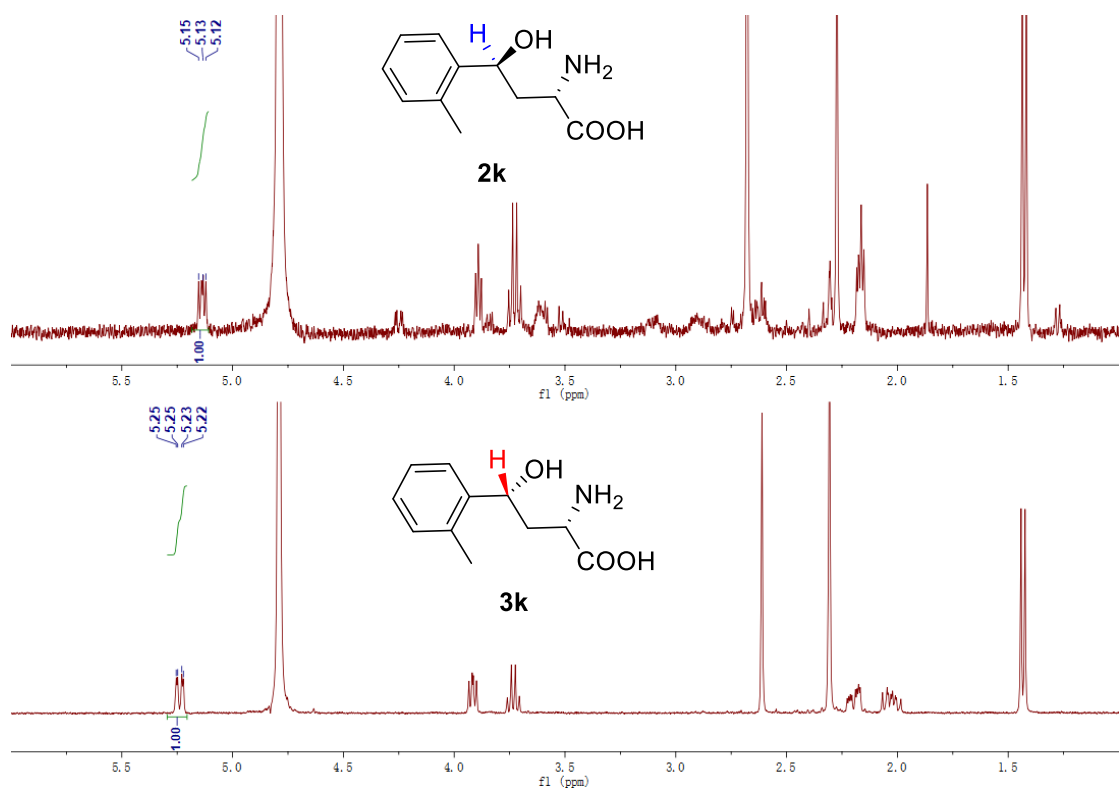

**Figure S68.** Diastereoisomeric ratio of **2k** and **3k**

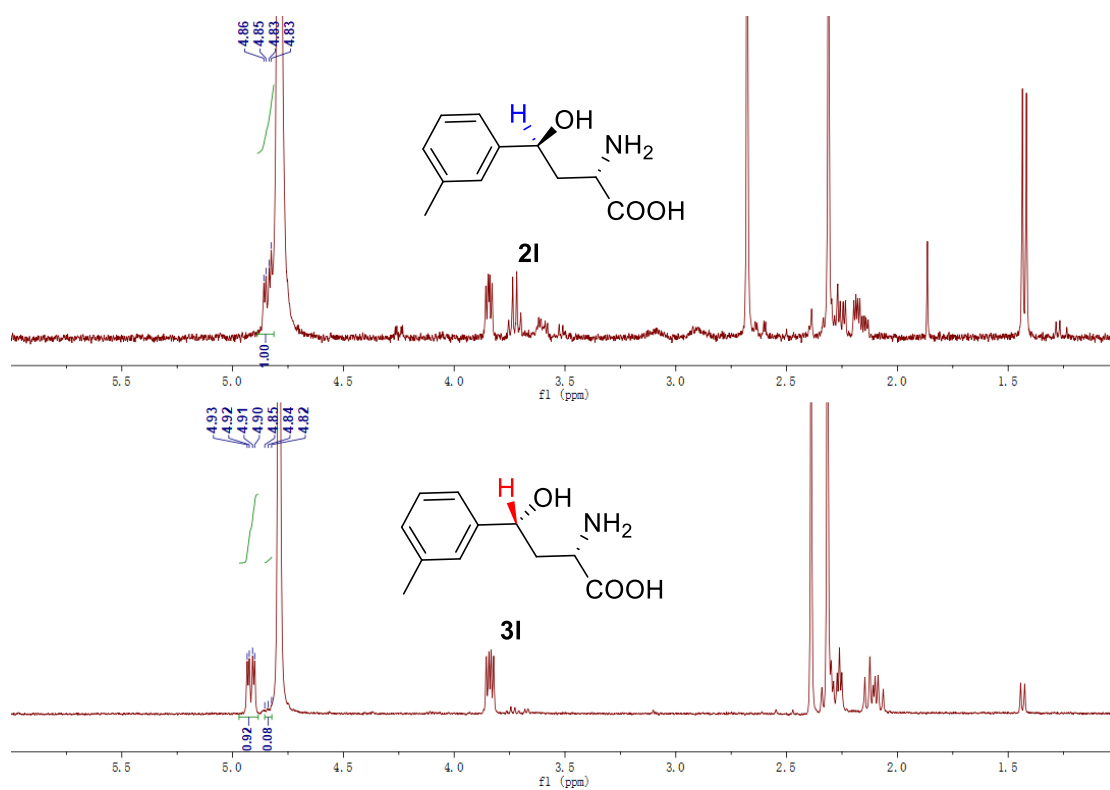

**Figure S69.** Diastereoisomeric ratio of **2l** and **3l**

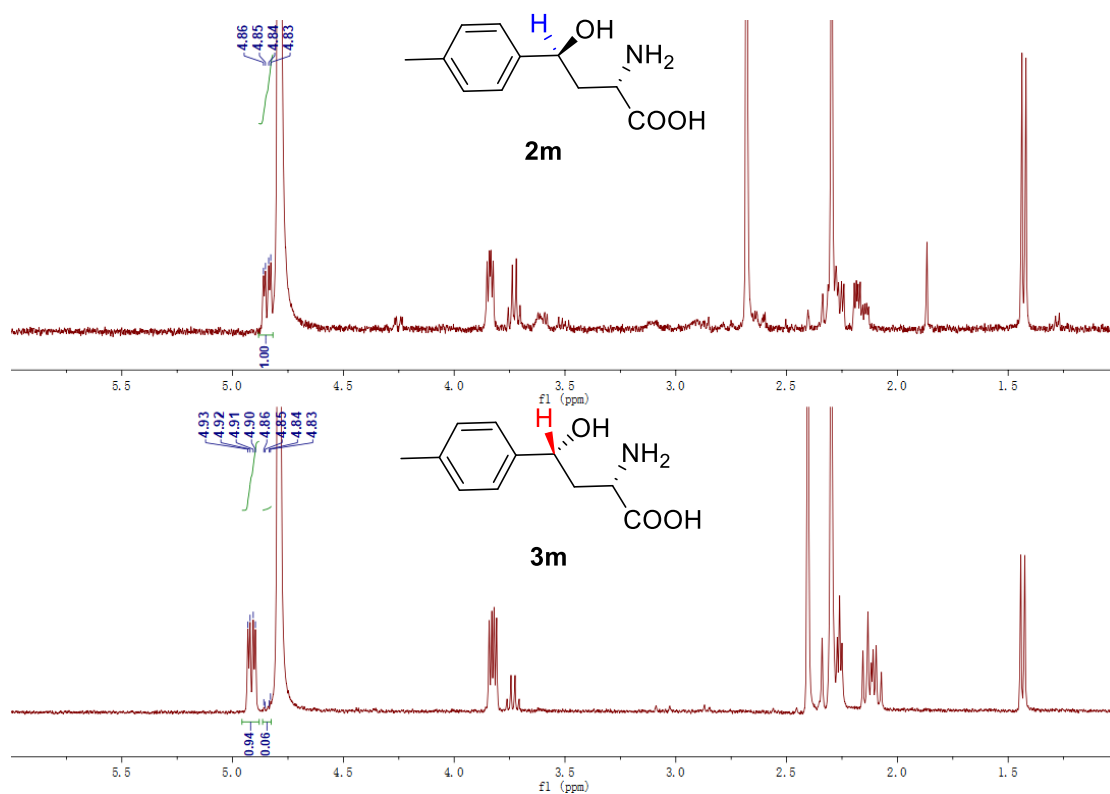

**Figure S70.** Diastereoisomeric ratio of **2m** and **3m**

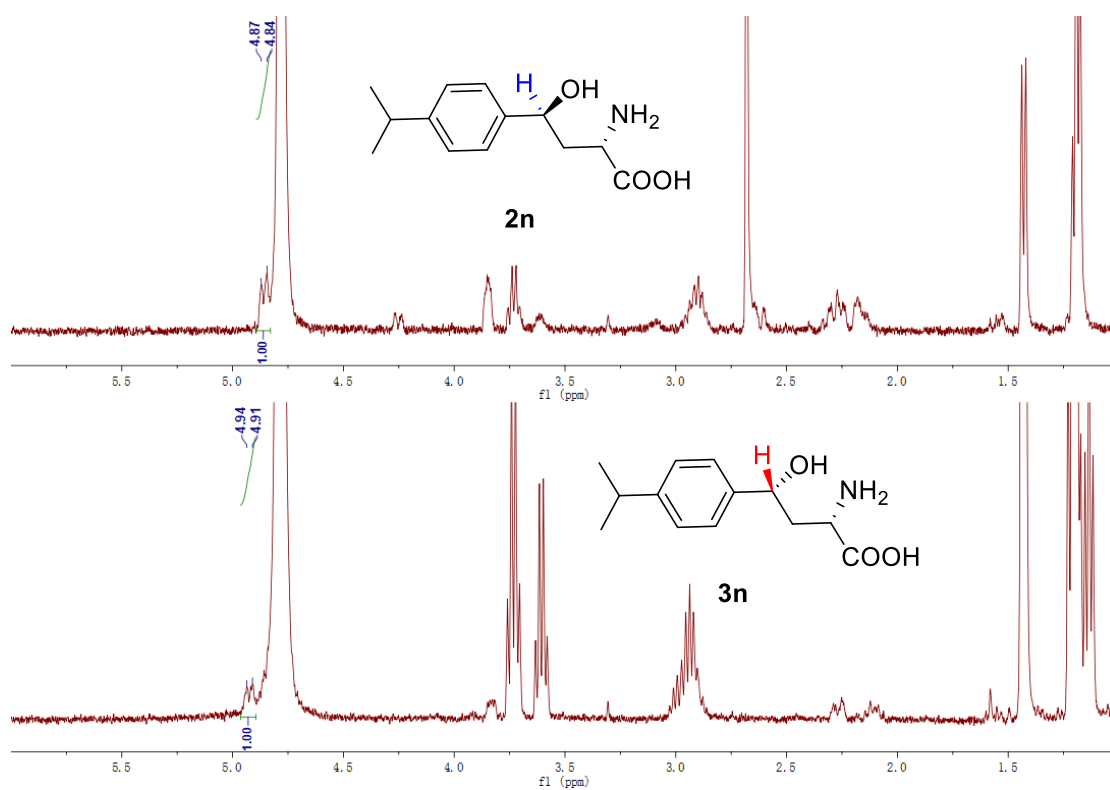

**Figure S71.** Diastereoisomeric ratio of **2n** and **3n**

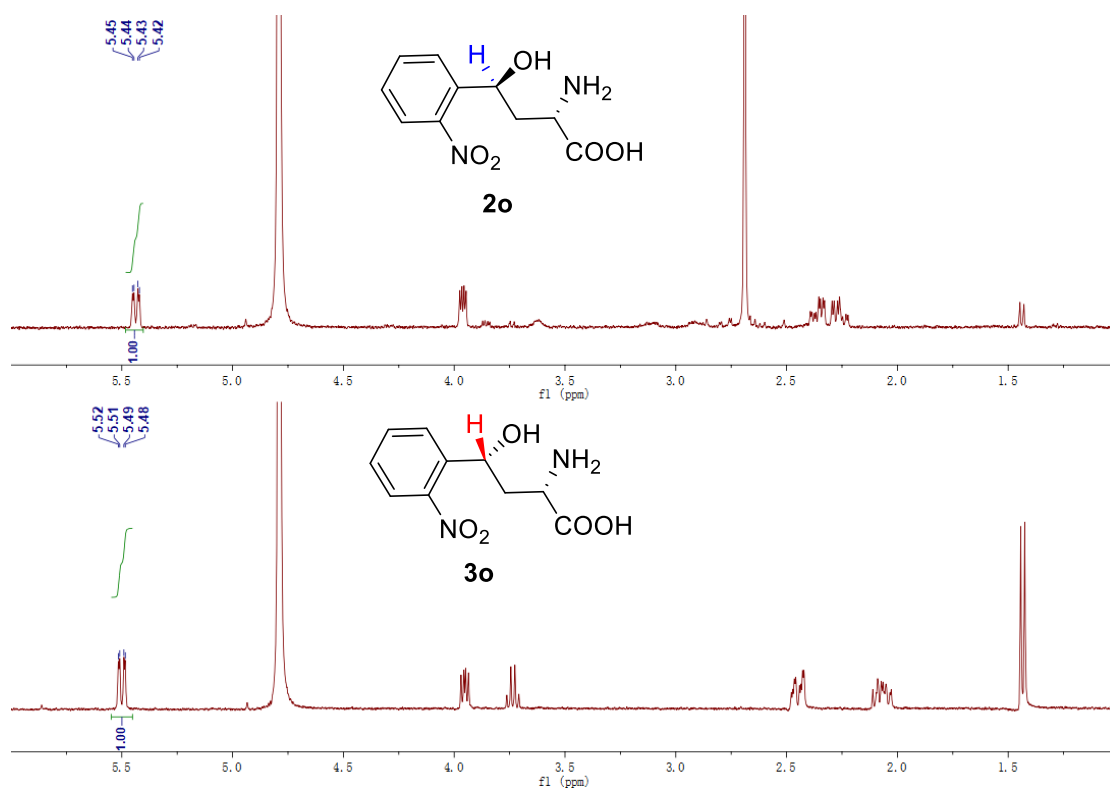

**Figure S72.** Diastereoisomeric ratio of **2o** and **3o**

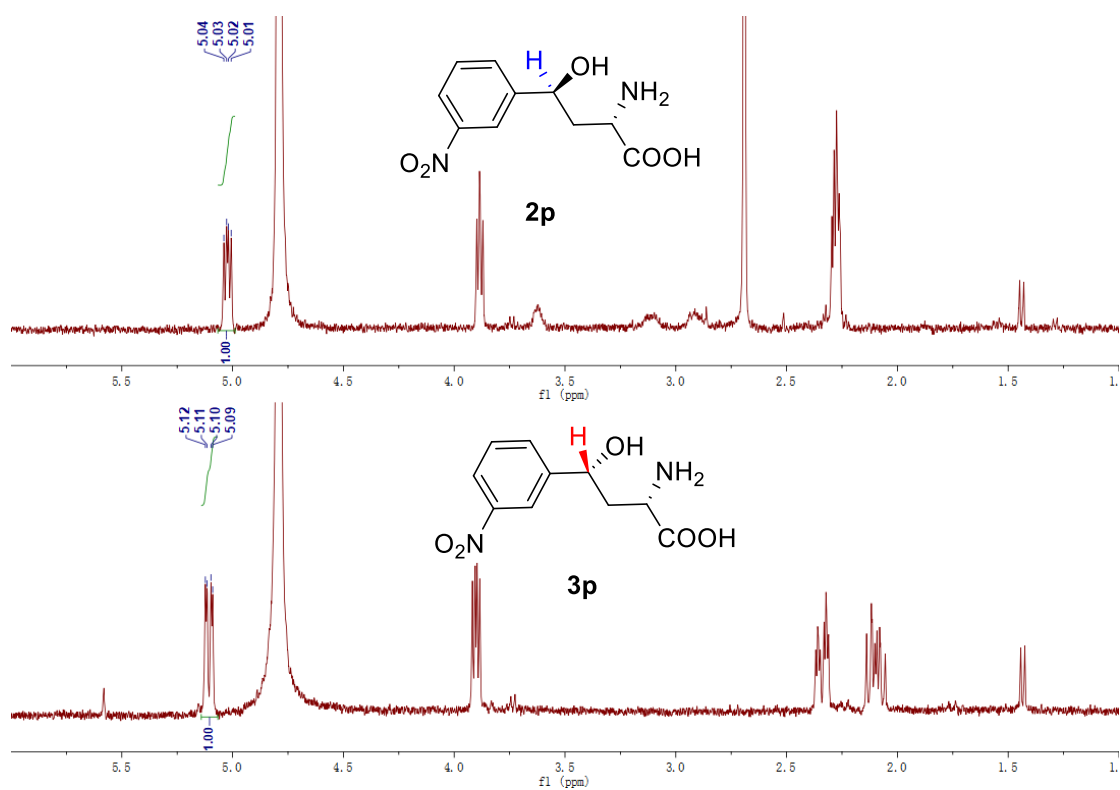

**Figure S73.** Diastereoisomeric ratio of **2p** and **3p**

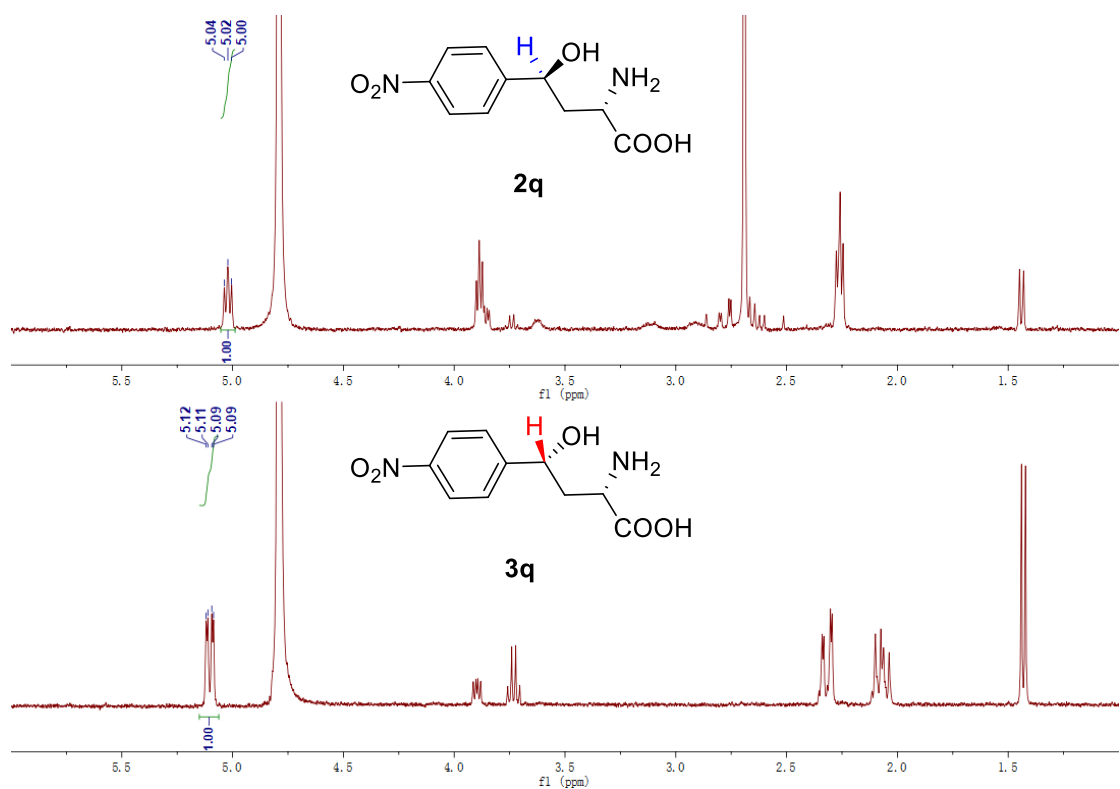

**Figure S74.** Diastereoisomeric ratio of **2q** and **3q**

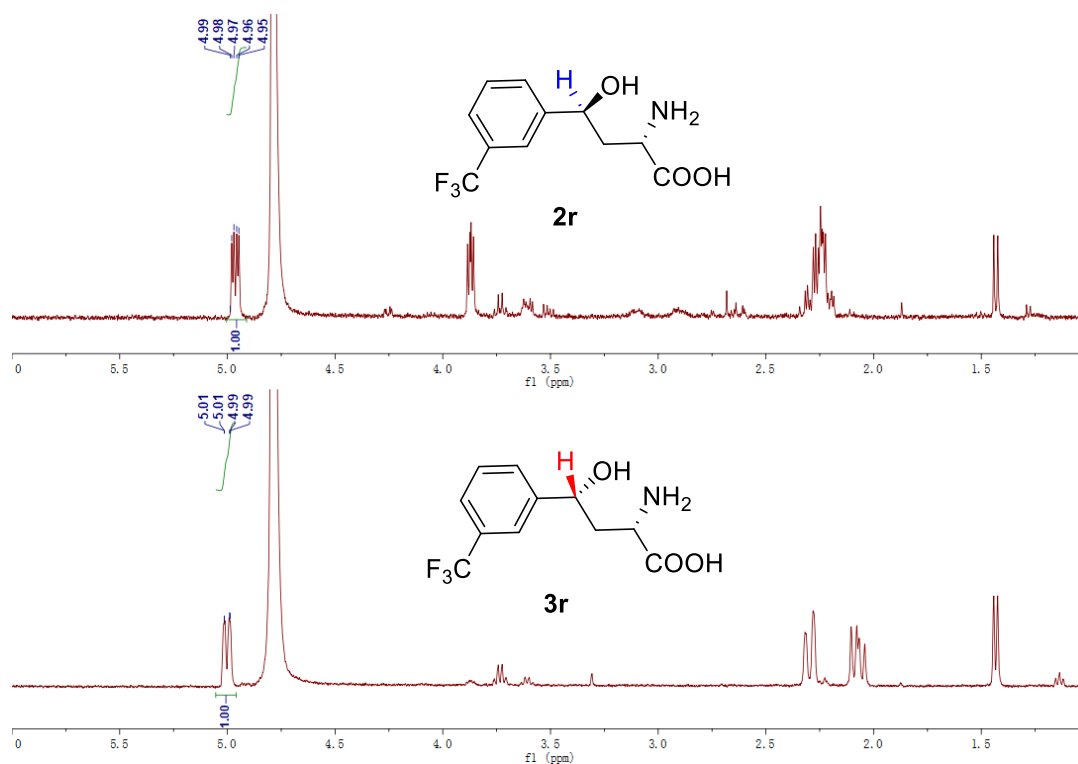

**Figure S75.** Diastereoisomeric ratio of **2r** and **3r**

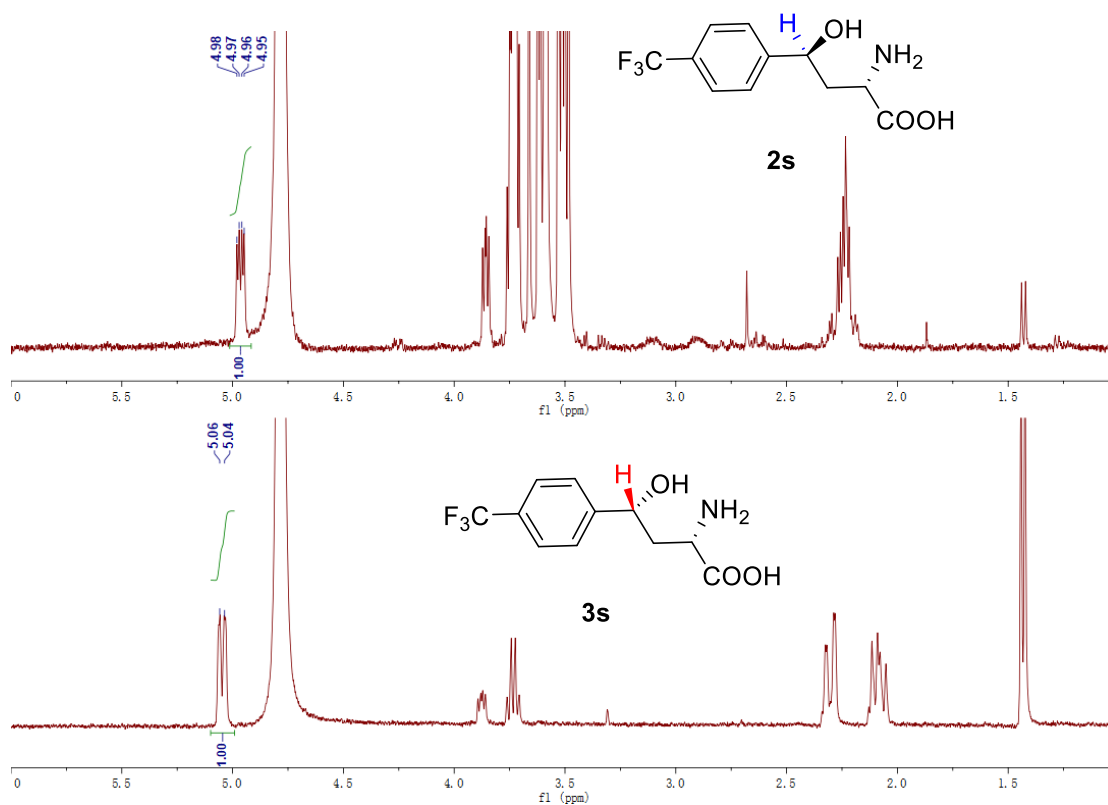

**Figure S76.** Diastereoisomeric ratio of **2s** and **3s**



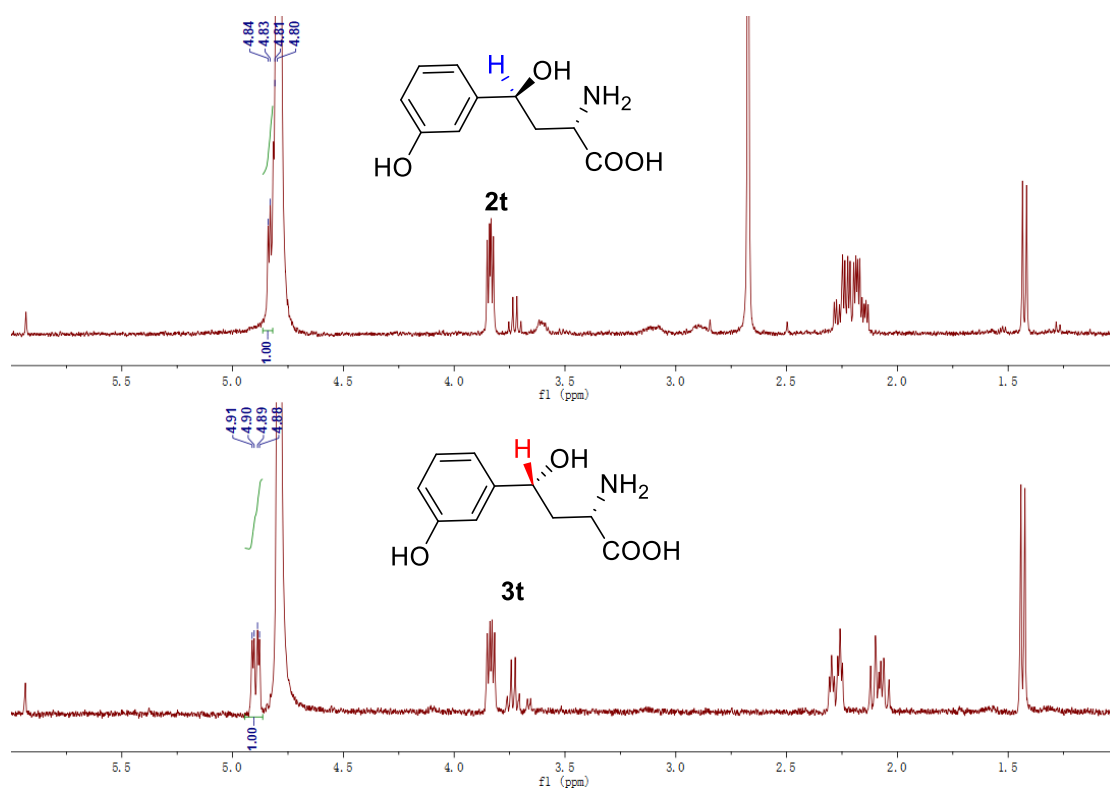

**Figure S77.** Diastereoisomeric ratio of **2t** and **3t**

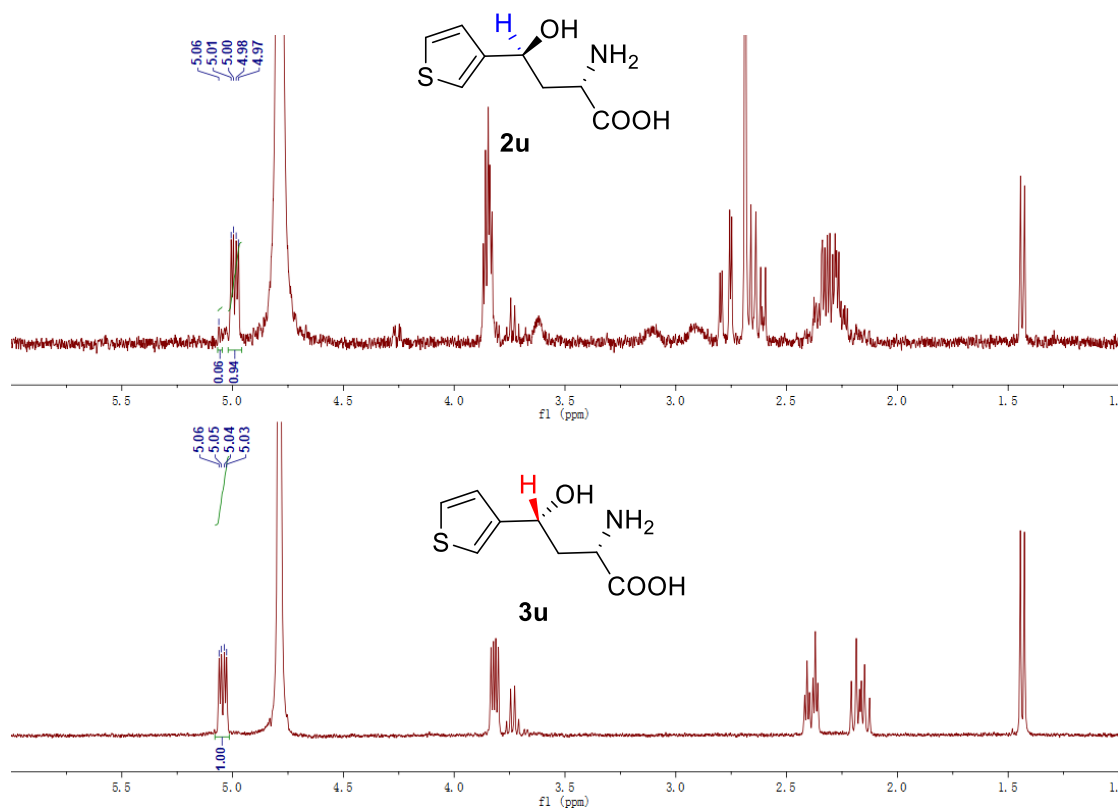

**Figure S78.** Diastereoisomeric ratio of **2u** and **3u**

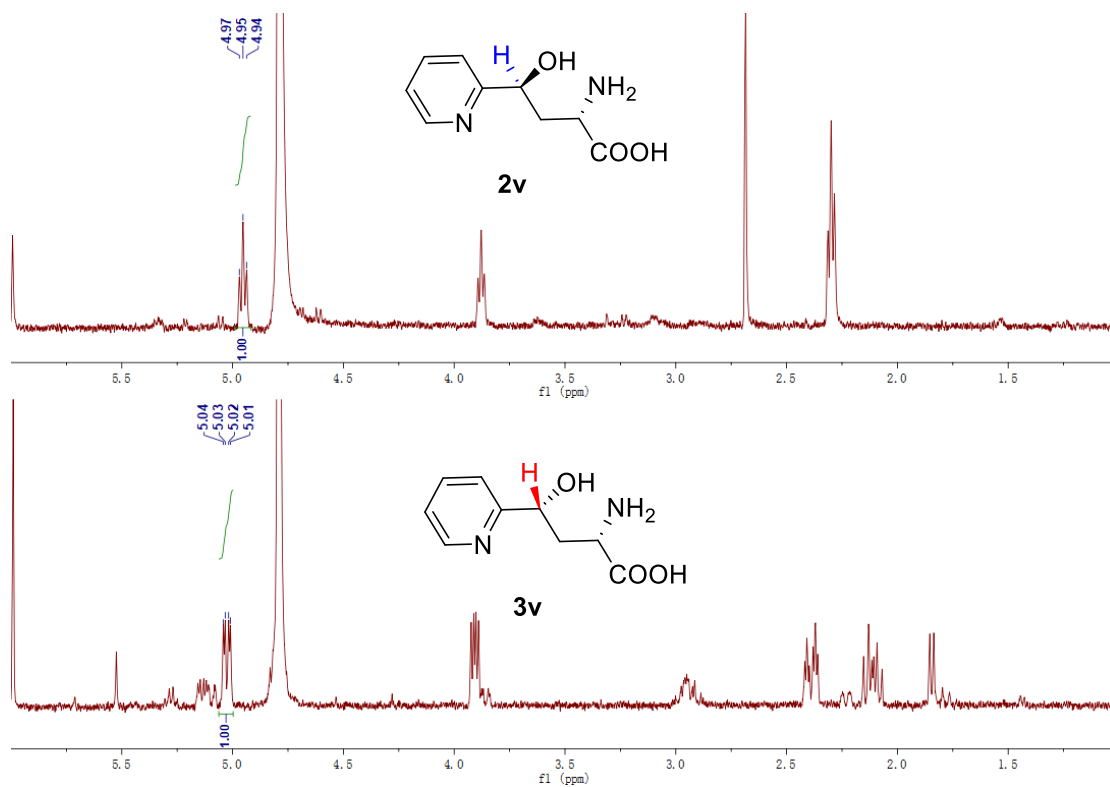

**Figure S79.** Diastereoisomeric ratio of **2v** and **3v**

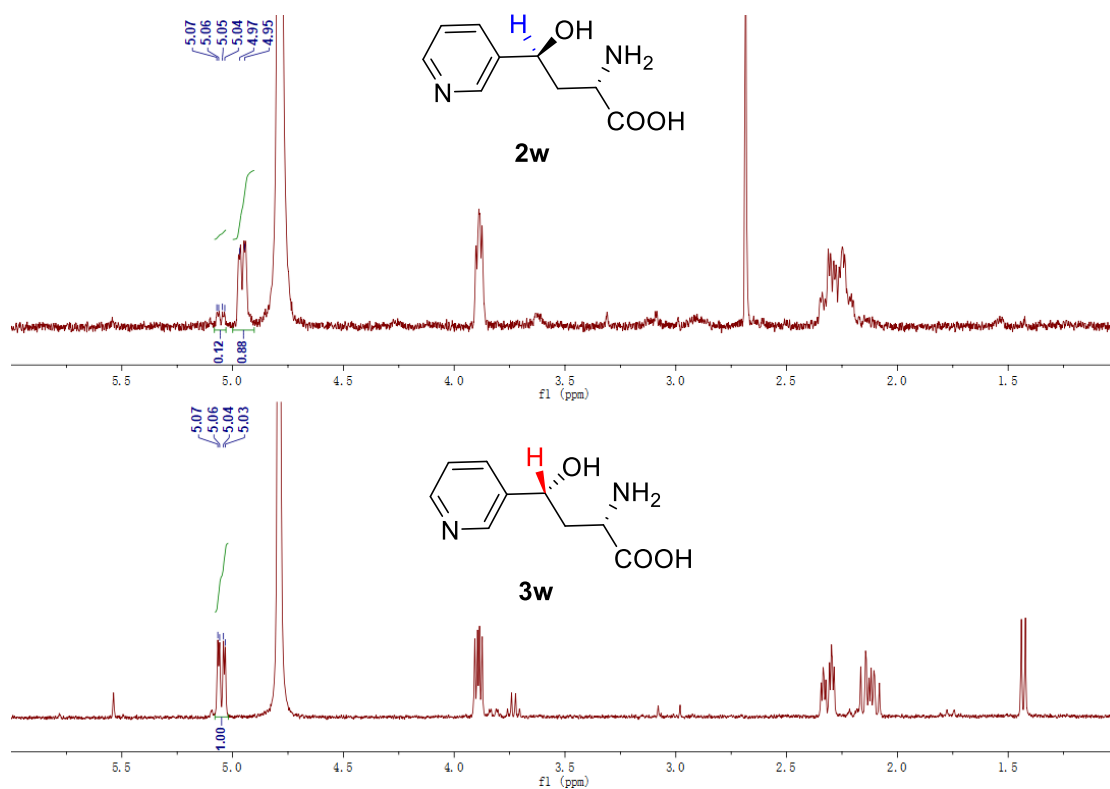

**Figure S80.** Diastereoisomeric ratio of **2w** and **3w**

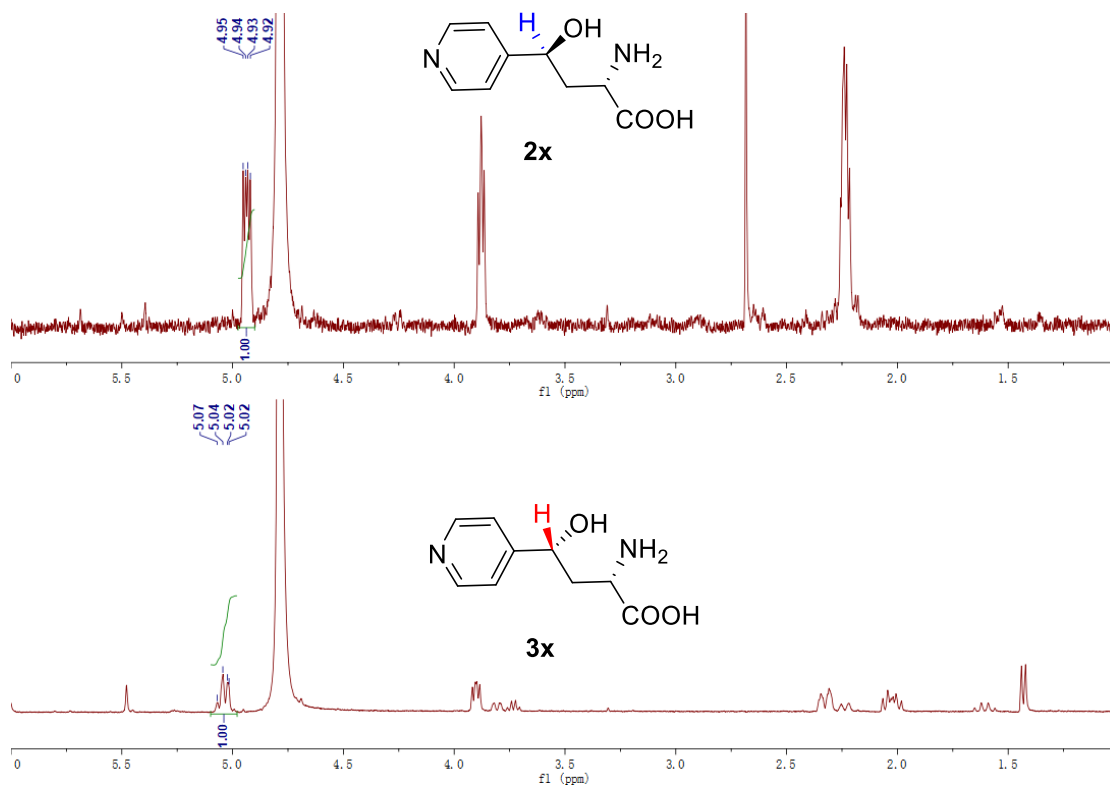

**Figure S81.** Diastereoisomeric ratio of **2x** and **3x**

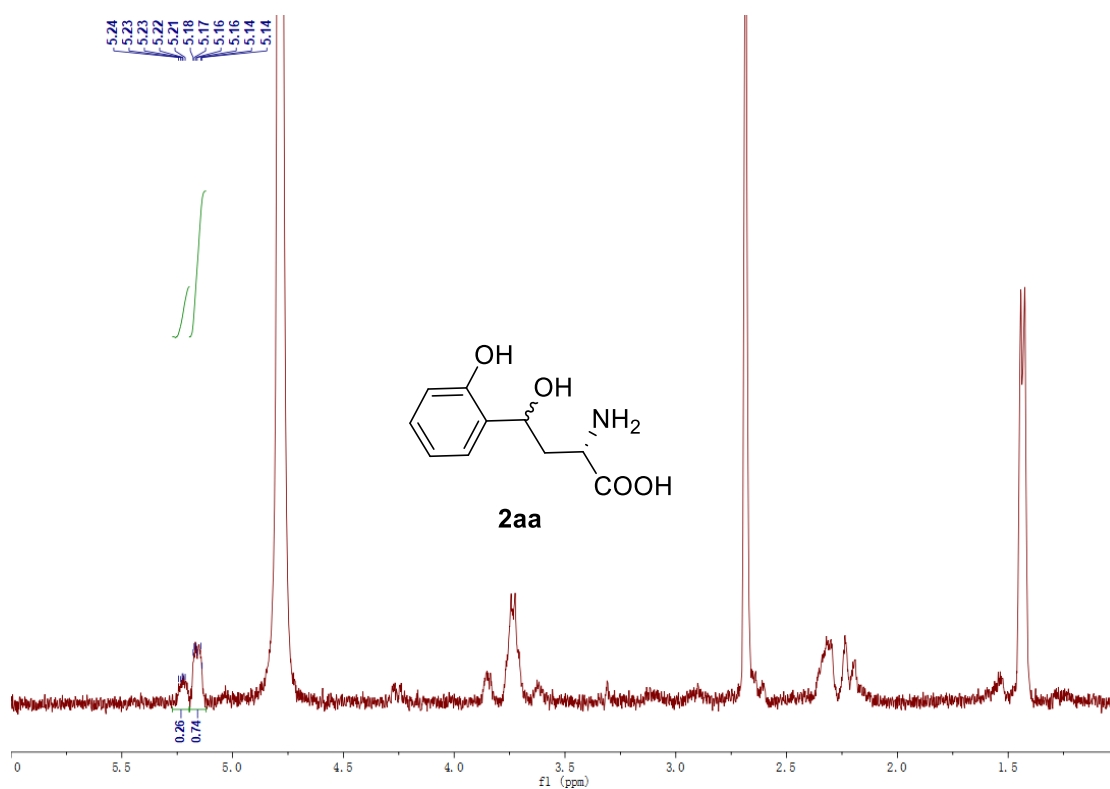

**Figure S82.** Diastereoisomeric ratio of **2aa**

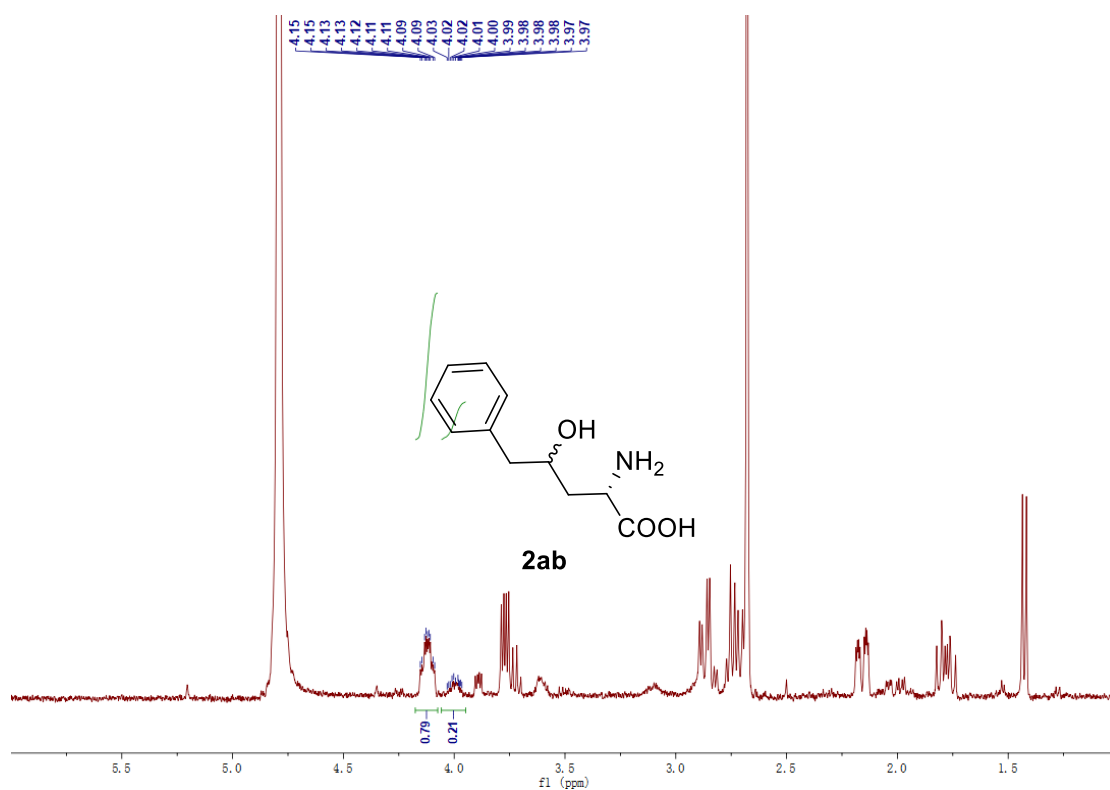

**Figure S83.** Diastereoisomeric ratio of **2ab**

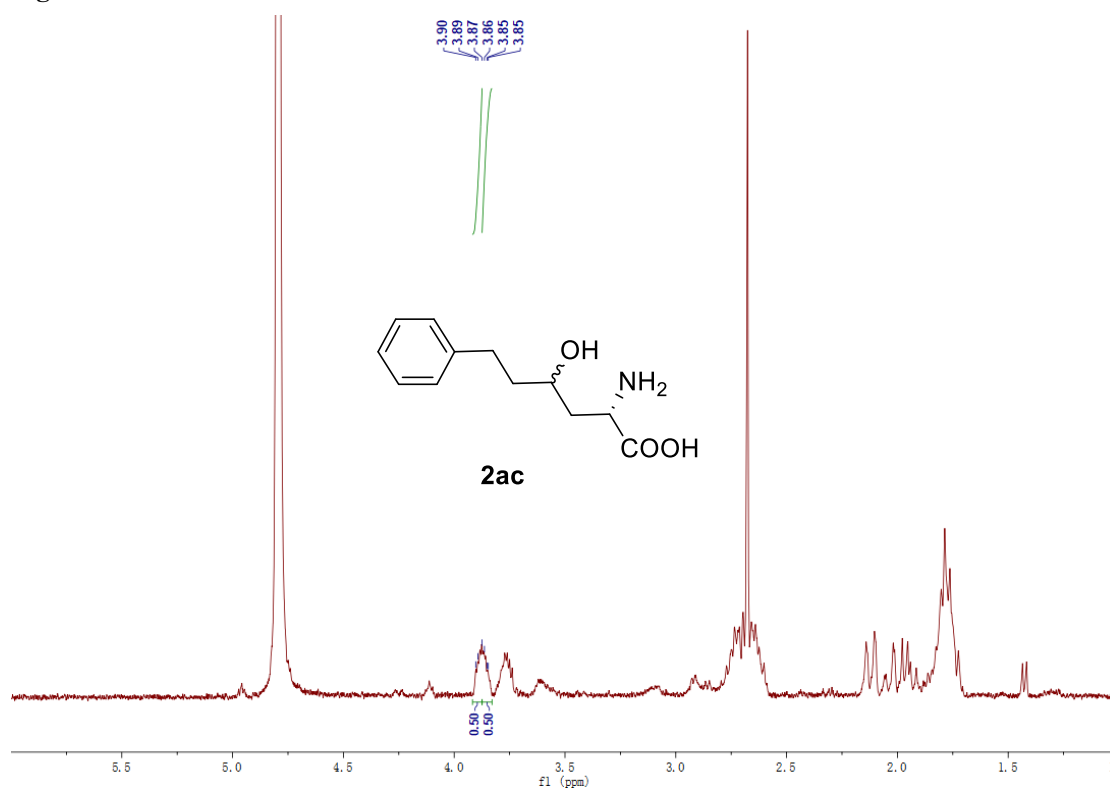

**Figure S84.** Diastereoisomeric ratio of **2ac**

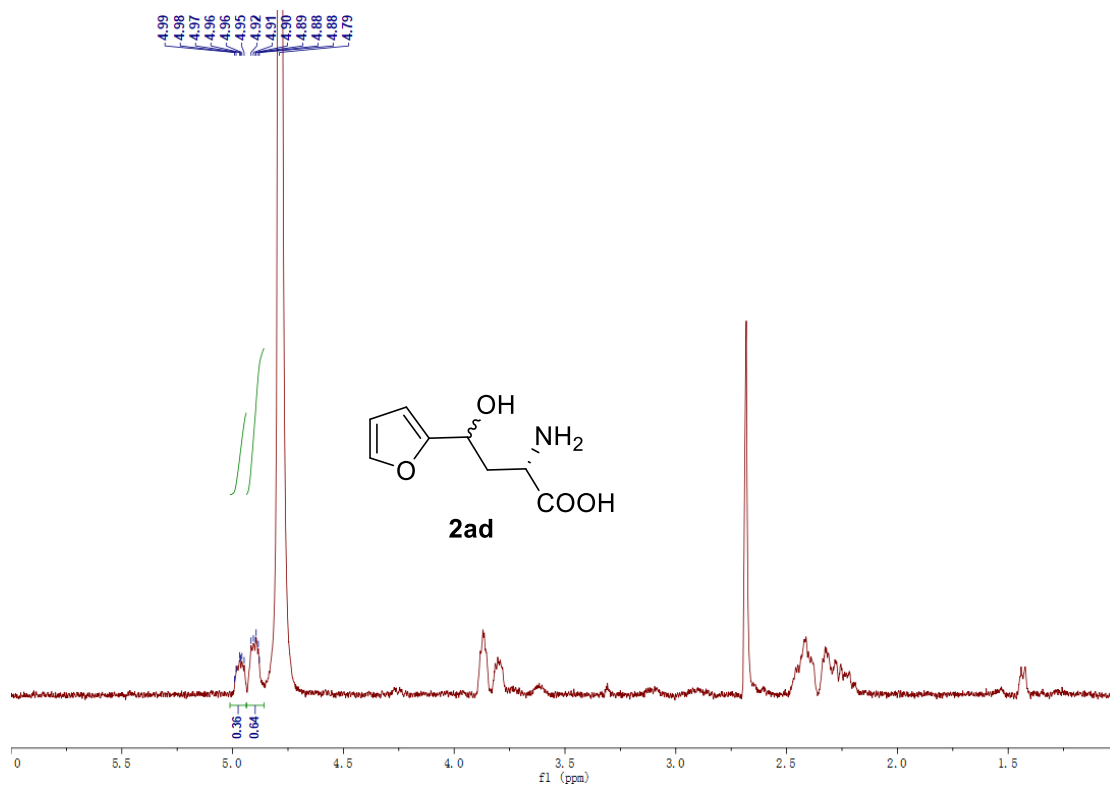

**Figure S85.** Diastereoisomeric ratio of **2ad**

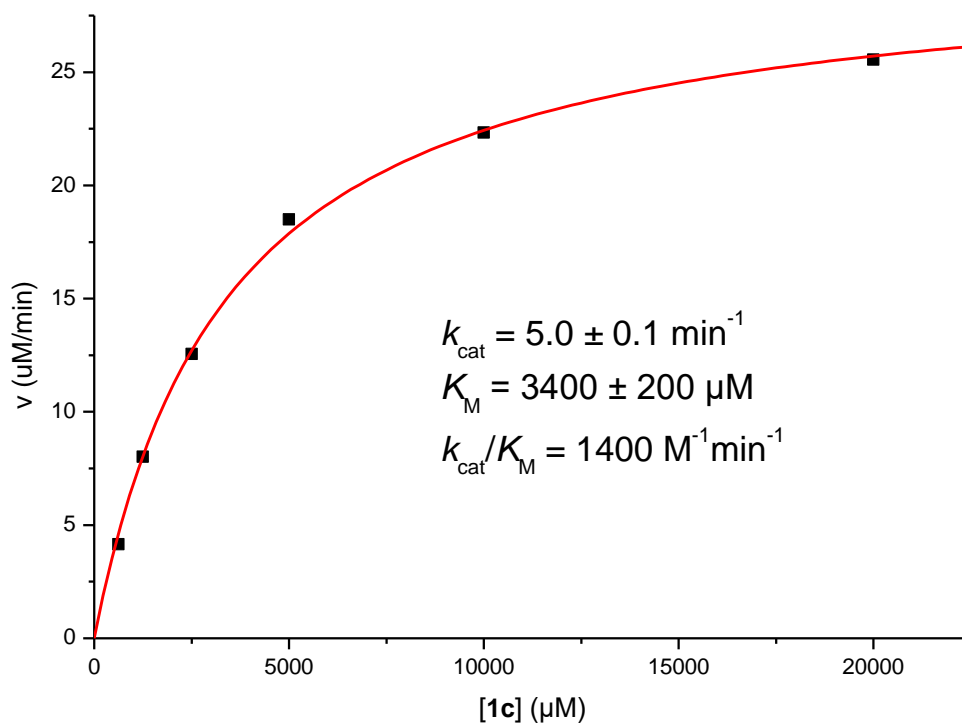

**Figure S86.** Michaelis-Menten curve and kinetic parameters of **1c**

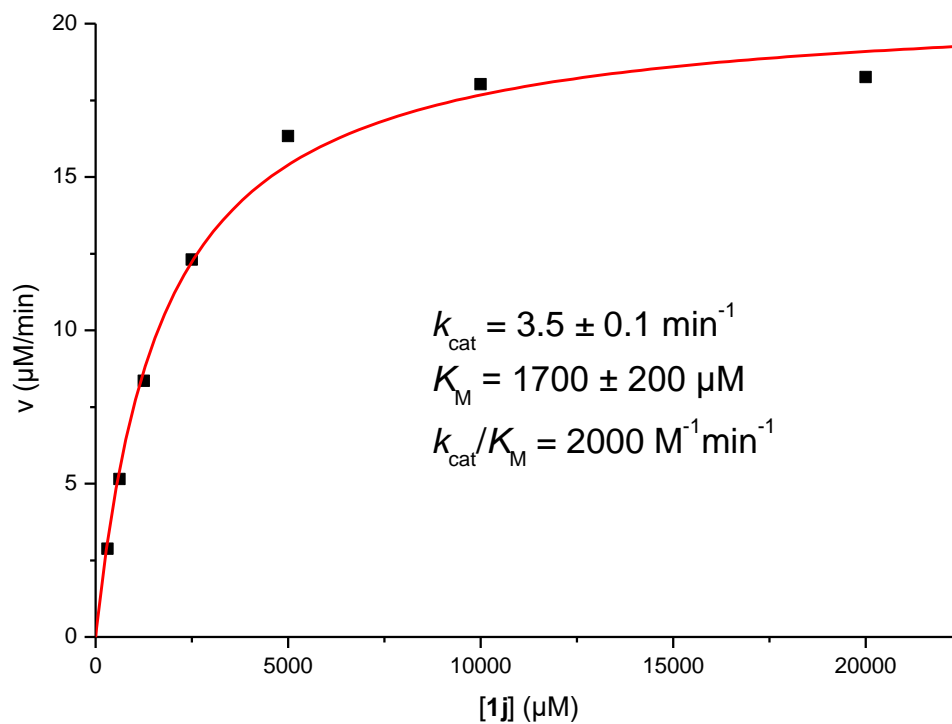

**Figure S87.** Michaelis-Menten curve and kinetic parameters of **1j**

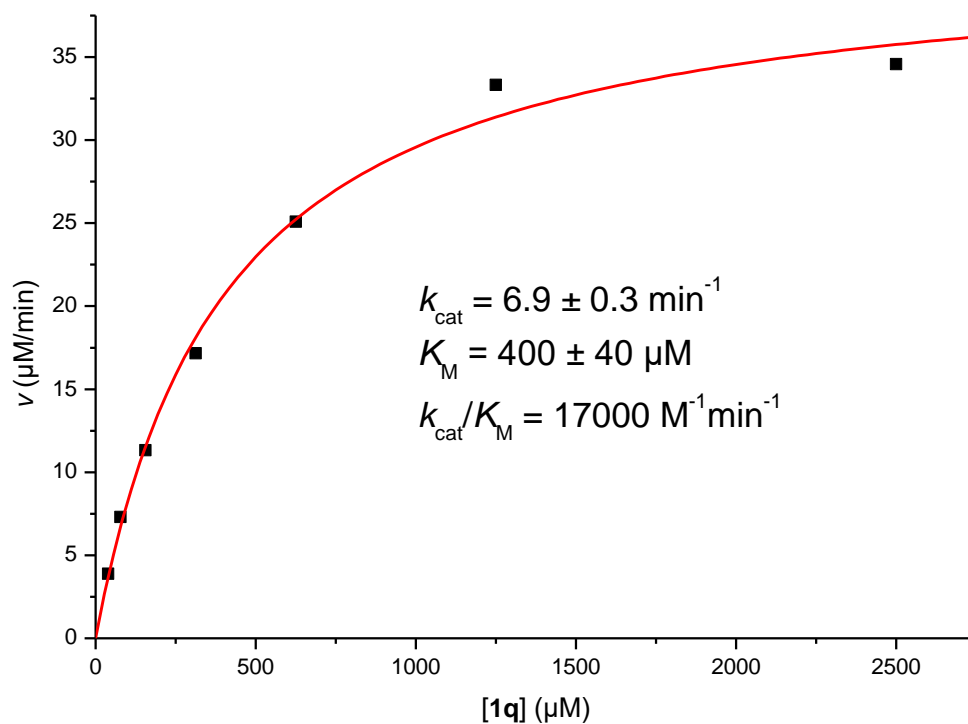

**Figure S88.** Michaelis-Menten curve and kinetic parameters of **1q**

# HR-MS and NMR spectra

## Qualitative Analysis Report

|                        |                                        |                               |                             |
|------------------------|----------------------------------------|-------------------------------|-----------------------------|
| <b>Data Filename</b>   | ESI202102573.d                         | <b>Sample Name</b>            | G5-G5-BJQ                   |
| <b>Sample ID</b>       |                                        | <b>Position</b>               | P1-B6                       |
| <b>Instrument Name</b> | Agilent G6520 Q-TOF                    | <b>Acq Method</b>             | 20160322_MS_ESIH_POS_1min.m |
| <b>Acquired Time</b>   | 5/13/2021 11:47:42                     | <b>IRM Calibration Status</b> | Success                     |
| <b>DA Method</b>       | small molecular data analysis method.m | <b>Comment</b>                | ESI2H by zhuzhenyun         |

### User Spectra

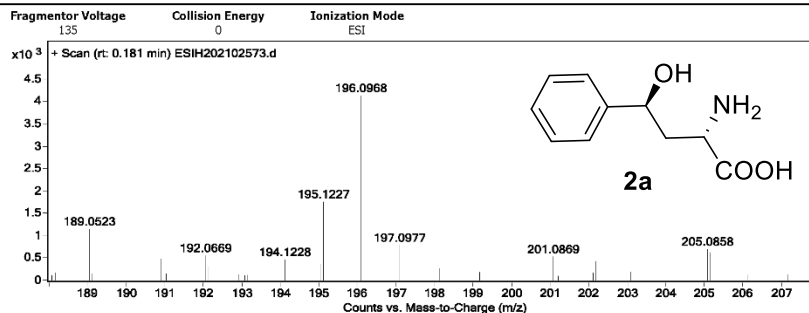

### Formula Calculator Results

| m/z      | Calc m/z | Diff (mDa) | Diff (ppm) | Ion Formula  | Ion    |
|----------|----------|------------|------------|--------------|--------|
| 196.0968 | 196.0968 | 0.05       | 0.26       | C10 H14 N O3 | (M+H)+ |

--- End Of Report ---

## Qualitative Analysis Report

|                        |                                        |                               |                             |
|------------------------|----------------------------------------|-------------------------------|-----------------------------|
| <b>Data Filename</b>   | ESI202102287.d                         | <b>Sample Name</b>            | G5-AP-2F                    |
| <b>Sample ID</b>       |                                        | <b>Position</b>               | P2-A3                       |
| <b>Instrument Name</b> | Agilent G6520 Q-TOF                    | <b>Acq Method</b>             | 20160322_MS_ESIH_POS_1min.m |
| <b>Acquired Time</b>   | 4/27/2021 18:12:47                     | <b>IRM Calibration Status</b> | Success                     |
| <b>DA Method</b>       | small molecular data analysis method.m | <b>Comment</b>                | ESI2H by zhuzhenyun         |

### User Spectra

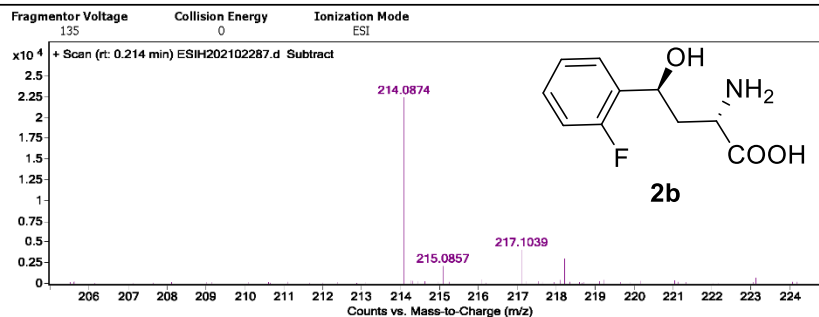

### Formula Calculator Results

| m/z      | Calc m/z | Diff (mDa) | Diff (ppm) | Ion Formula    | Ion    |
|----------|----------|------------|------------|----------------|--------|
| 214.0874 | 214.0874 | 0.05       | 0.22       | C10 H13 F N O3 | (M+H)+ |

--- End Of Report ---

## Qualitative Analysis Report

|                                                         |                                               |
|---------------------------------------------------------|-----------------------------------------------|
| <b>Data Filename</b> ESIH202102288.d                    | <b>Sample Name</b> G5-AP-3F                   |
| <b>Sample ID</b>                                        | <b>Position</b> P2-A4                         |
| <b>Instrument Name</b> Agilent G6520 Q-TOF              | <b>Acq Method</b> 20160322_MS_ESIH_POS_1min.m |
| <b>Acquired Time</b> 4/27/2021 18:14:14                 | <b>IRM Calibration Status</b> Success         |
| <b>DA Method</b> small molecular data analysis method.m | <b>Comment</b> ESIH by zhuzhenyun             |

### User Spectra

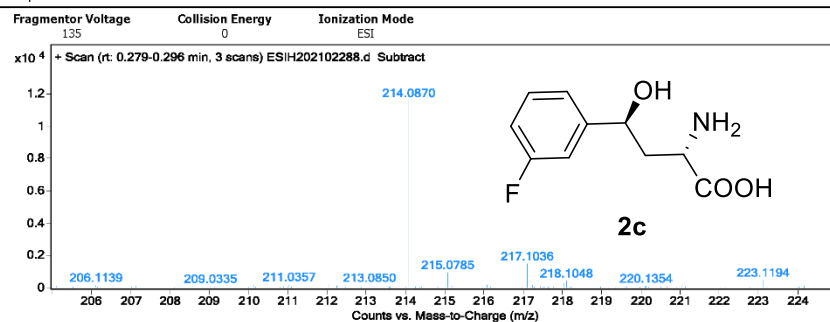

### Formula Calculator Results

| m/z     | Calc m/z | Diff (mDa) | Diff (ppm) | Ion Formula                                        | Ion                |
|---------|----------|------------|------------|----------------------------------------------------|--------------------|
| 214.087 | 214.0874 | 0.38       | 1.77       | C <sub>10</sub> H <sub>13</sub> F N O <sub>3</sub> | (M+H) <sup>+</sup> |

--- End Of Report ---

## Qualitative Analysis Report

|                                                         |                                               |
|---------------------------------------------------------|-----------------------------------------------|
| <b>Data Filename</b> ESIH202102289.d                    | <b>Sample Name</b> G5-AP-4F                   |
| <b>Sample ID</b>                                        | <b>Position</b> P2-A5                         |
| <b>Instrument Name</b> Agilent G6520 Q-TOF              | <b>Acq Method</b> 20160322_MS_ESIH_POS_1min.m |
| <b>Acquired Time</b> 4/27/2021 18:15:42                 | <b>IRM Calibration Status</b> Success         |
| <b>DA Method</b> small molecular data analysis method.m | <b>Comment</b> ESIH by zhuzhenyun             |

### User Spectra

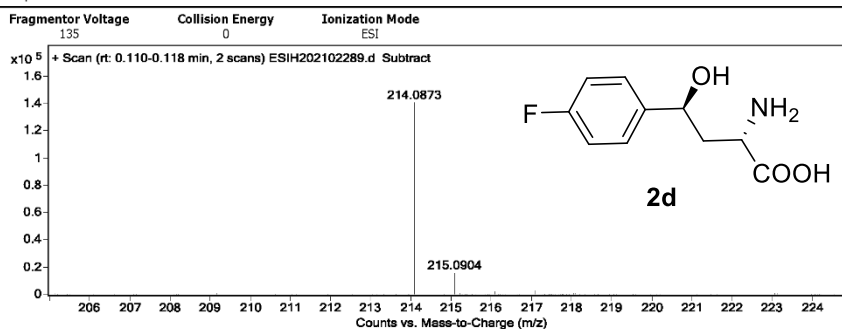

### Formula Calculator Results

| m/z      | Calc m/z | Diff (mDa) | Diff (ppm) | Ion Formula                                        | Ion                |
|----------|----------|------------|------------|----------------------------------------------------|--------------------|
| 214.0873 | 214.0874 | 0.06       | 0.39       | C <sub>10</sub> H <sub>13</sub> F N O <sub>3</sub> | (M+H) <sup>+</sup> |

--- End Of Report ---



## Qualitative Analysis Report

|                        |                                        |                               |                             |
|------------------------|----------------------------------------|-------------------------------|-----------------------------|
| <b>Data Filename</b>   | ESI202102290.d                         | <b>Sample Name</b>            | G5-AP-2Cl                   |
| <b>Sample ID</b>       |                                        | <b>Position</b>               | P2-A6                       |
| <b>Instrument Name</b> | Agilent G6520 Q-TOF                    | <b>Acq Method</b>             | 20160322_MS_ESIH_POS_1min.m |
| <b>Acquired Time</b>   | 4/27/2021 18:17:10                     | <b>IRM Calibration Status</b> | Success                     |
| <b>DA Method</b>       | small molecular data analysis method.m | <b>Comment</b>                | ESIH by zhuzhenyun          |

### User Spectra

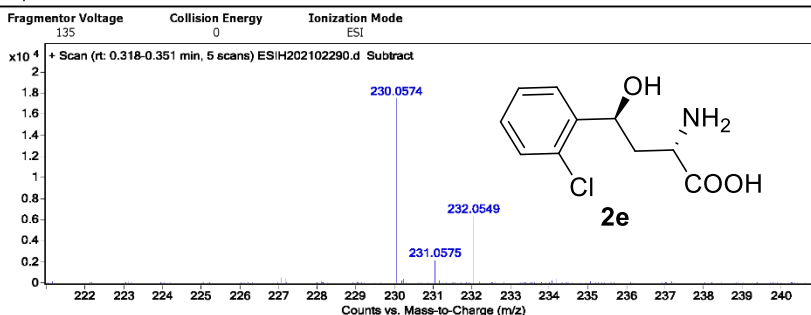

### Formula Calculator Results

| m/z      | Calc m/z | Diff (mDa) | Diff (ppm) | Ion Formula     | Ion    |
|----------|----------|------------|------------|-----------------|--------|
| 230.0574 | 230.0578 | 0.42       | 1.83       | C10 H13 Cl N O3 | (M+H)+ |

--- End Of Report ---

## Qualitative Analysis Report

|                        |                                        |                               |                             |
|------------------------|----------------------------------------|-------------------------------|-----------------------------|
| <b>Data Filename</b>   | ESI202102291.d                         | <b>Sample Name</b>            | G5-AP-3Cl                   |
| <b>Sample ID</b>       |                                        | <b>Position</b>               | P2-A7                       |
| <b>Instrument Name</b> | Agilent G6520 Q-TOF                    | <b>Acq Method</b>             | 20160322_MS_ESIH_POS_1min.m |
| <b>Acquired Time</b>   | 4/27/2021 18:18:37                     | <b>IRM Calibration Status</b> | Success                     |
| <b>DA Method</b>       | small molecular data analysis method.m | <b>Comment</b>                | ESIH by zhuzhenyun          |

### User Spectra

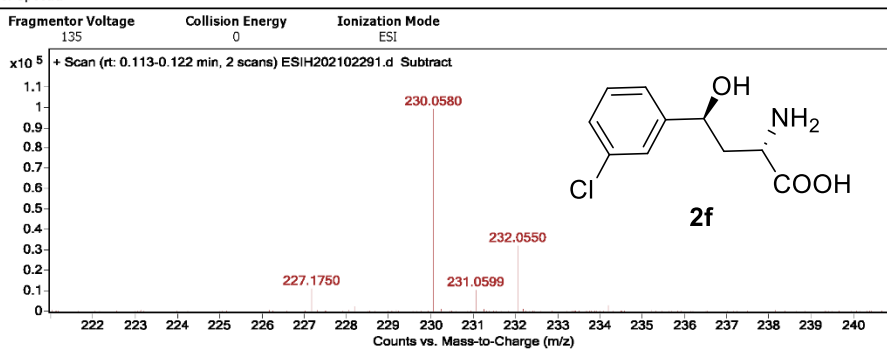

### Formula Calculator Results

| m/z     | Calc m/z | Diff (mDa) | Diff (ppm) | Ion Formula     | Ion    |
|---------|----------|------------|------------|-----------------|--------|
| 230.058 | 230.0578 | -0.15      | -0.64      | C10 H13 Cl N O3 | (M+H)+ |

--- End Of Report ---

## Qualitative Analysis Report

|                 |                                        |                        |                              |
|-----------------|----------------------------------------|------------------------|------------------------------|
| Data Filename   | ESI202102292.d                         | Sample Name            | G5-AP-4Cl                    |
| Sample ID       |                                        | Position               | P2-A8                        |
| Instrument Name | Agilent G6520 Q-TOF                    | Acq Method             | 20160322_MS_ESI_H_POS_1min.m |
| Acquired Time   | 4/27/2021 18:21:17                     | IRM Calibration Status | Success                      |
| DA Method       | small molecular data analysis method.m | Comment                | ESI2H by zhuzhenyun          |

### User Spectra

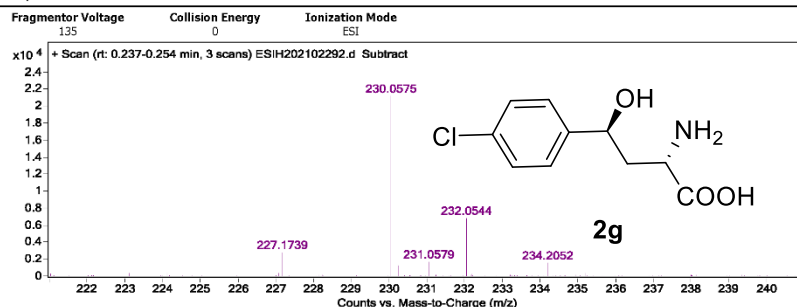

### Formula Calculator Results

| m/z      | Calc m/z | Diff (mDa) | Diff (ppm) | Ion Formula     | Ion    |
|----------|----------|------------|------------|-----------------|--------|
| 230.0575 | 230.0578 | 0.38       | 1.66       | C10 H13 Cl N O3 | (M+H)+ |

--- End Of Report ---

## Qualitative Analysis Report

|                 |                                        |                        |                              |
|-----------------|----------------------------------------|------------------------|------------------------------|
| Data Filename   | ESI202102293.d                         | Sample Name            | G5-AP-2Br                    |
| Sample ID       |                                        | Position               | P2-A9                        |
| Instrument Name | Agilent G6520 Q-TOF                    | Acq Method             | 20160322_MS_ESI_H_POS_1min.m |
| Acquired Time   | 4/27/2021 18:22:45                     | IRM Calibration Status | Success                      |
| DA Method       | small molecular data analysis method.m | Comment                | ESI2H by zhuzhenyun          |

### User Spectra

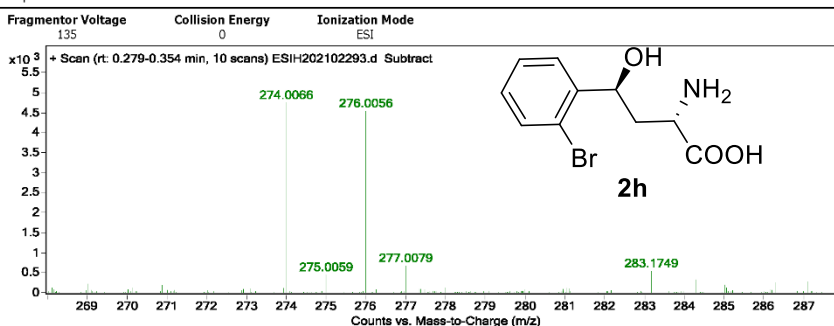

### Formula Calculator Results

| m/z      | Calc m/z | Diff (mDa) | Diff (ppm) | Ion Formula     | Ion    |
|----------|----------|------------|------------|-----------------|--------|
| 274.0066 | 274.0073 | 0.71       | 2.6        | C10 H13 Br N O3 | (M+H)+ |

--- End Of Report ---

## Qualitative Analysis Report

|                                                         |                                               |
|---------------------------------------------------------|-----------------------------------------------|
| <b>Data Filename</b> ESIH202102294.d                    | <b>Sample Name</b> G5-AP-3Br                  |
| <b>Sample ID</b>                                        | <b>Position</b> P2-B1                         |
| <b>Instrument Name</b> Agilent G6520 Q-TOF              | <b>Acq Method</b> Z0160322_MS_ESIH_POS_1min.m |
| <b>Acquired Time</b> 4/27/2021 18:24:14                 | <b>IRM Calibration Status</b> Success         |
| <b>DA Method</b> small molecular data analysis method.m | <b>Comment</b> ESIH by zhuzhenyun             |

### User Spectra

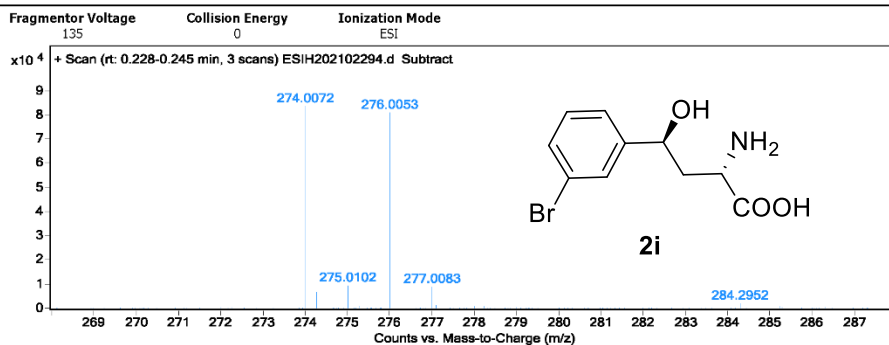

### Formula Calculator Results

| m/z      | Calc m/z | Diff (mDa) | Diff (ppm) | Ion Formula     | Ion    |
|----------|----------|------------|------------|-----------------|--------|
| 274.0072 | 274.0073 | 0.13       | 0.48       | C10 H13 Br N O3 | (M+H)+ |

--- End Of Report ---

## Qualitative Analysis Report

|                                                         |                                               |
|---------------------------------------------------------|-----------------------------------------------|
| <b>Data Filename</b> ESIH202102295.d                    | <b>Sample Name</b> G5-AP-4Br                  |
| <b>Sample ID</b>                                        | <b>Position</b> P2-B2                         |
| <b>Instrument Name</b> Agilent G6520 Q-TOF              | <b>Acq Method</b> Z0160322_MS_ESIH_POS_1min.m |
| <b>Acquired Time</b> 4/27/2021 18:25:42                 | <b>IRM Calibration Status</b> Success         |
| <b>DA Method</b> small molecular data analysis method.m | <b>Comment</b> ESIH by zhuzhenyun             |

### User Spectra

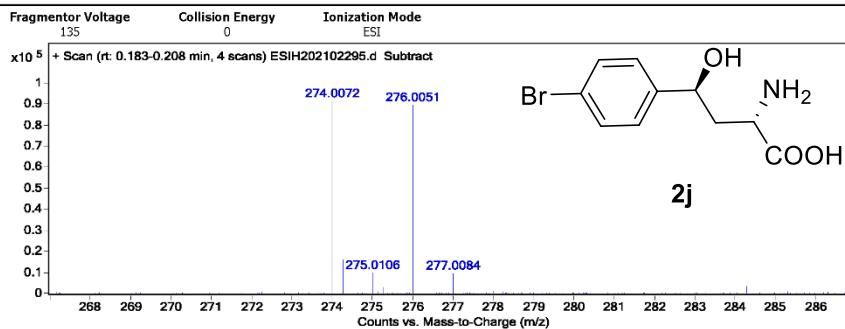

### Formula Calculator Results

| m/z      | Calc m/z | Diff (mDa) | Diff (ppm) | Ion Formula     | Ion    |
|----------|----------|------------|------------|-----------------|--------|
| 274.0072 | 274.0073 | 0.13       | 0.48       | C10 H13 Br N O3 | (M+H)+ |

--- End Of Report ---

## Qualitative Analysis Report

|                 |                                        |                        |                             |
|-----------------|----------------------------------------|------------------------|-----------------------------|
| Data Filename   | ESI202102296.d                         | Sample Name            | G5-AP-2JJ                   |
| Sample ID       |                                        | Position               | P2-B3                       |
| Instrument Name | Agilent G6520 Q-TOF                    | Acq Method             | 20160322_MS_ESIH_POS_1min.m |
| Acquired Time   | 4/27/2021 18:27:10                     | IRM Calibration Status | Success                     |
| DA Method       | small molecular data analysis method.m | Comment                | ESIH by zhuzhenyun          |

### User Spectra

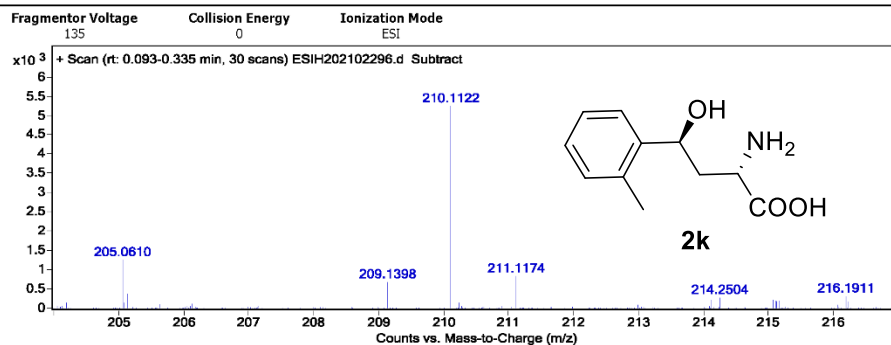

### Formula Calculator Results

| m/z      | Calc m/z | Diff (mDa) | Diff (ppm) | Ion Formula  | Ion    |
|----------|----------|------------|------------|--------------|--------|
| 210.1122 | 210.1125 | 0.23       | 1.11       | C11 H16 N O3 | (M+H)+ |

--- End Of Report ---

## Qualitative Analysis Report

|                 |                                        |                        |                             |
|-----------------|----------------------------------------|------------------------|-----------------------------|
| Data Filename   | ESI202102297.d                         | Sample Name            | G5-AP-3JJ                   |
| Sample ID       |                                        | Position               | P2-B4                       |
| Instrument Name | Agilent G6520 Q-TOF                    | Acq Method             | 20160322_MS_ESIH_POS_1min.m |
| Acquired Time   | 4/27/2021 18:28:38                     | IRM Calibration Status | Success                     |
| DA Method       | small molecular data analysis method.m | Comment                | ESIH by zhuzhenyun          |

### User Spectra

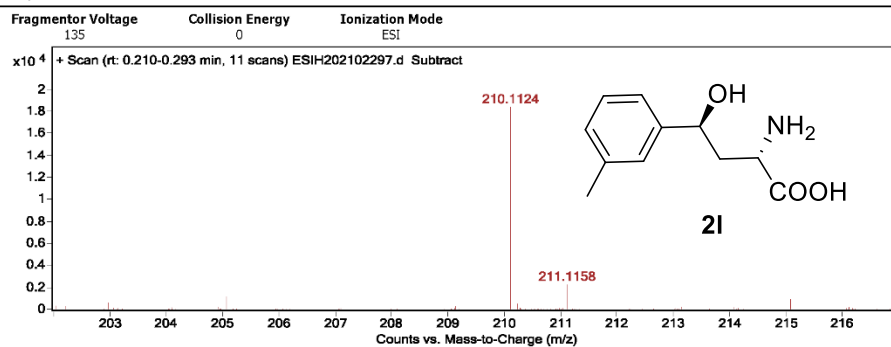

### Formula Calculator Results

| m/z      | Calc m/z | Diff (mDa) | Diff (ppm) | Ion Formula  | Ion    |
|----------|----------|------------|------------|--------------|--------|
| 210.1124 | 210.1125 | 0.02       | 0.11       | C11 H16 N O3 | (M+H)+ |

--- End Of Report ---

## Qualitative Analysis Report

|                        |                                        |                               |                             |
|------------------------|----------------------------------------|-------------------------------|-----------------------------|
| <b>Data Filename</b>   | ESI202102298.d                         | <b>Sample Name</b>            | G5-AP-4J                    |
| <b>Sample ID</b>       |                                        | <b>Position</b>               | P2-B5                       |
| <b>Instrument Name</b> | Agilent G6520 Q-TOF                    | <b>Acq Method</b>             | 20160322_MS_ESIH_POS_1min.m |
| <b>Acquired Time</b>   | 4/27/2021 18:30:05                     | <b>IRM Calibration Status</b> | Success                     |
| <b>DA Method</b>       | small molecular data analysis method.m | <b>Comment</b>                | ESIH by zhuzhenyun          |

### User Spectra

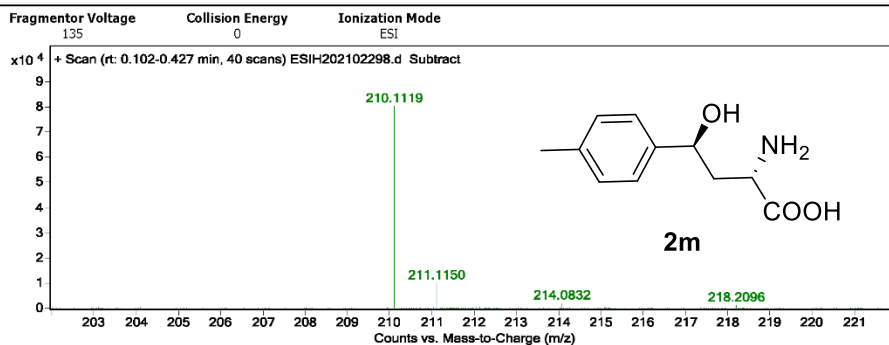

### Formula Calculator Results

| m/z      | Calc m/z | Diff (mDa) | Diff (ppm) | Ion Formula  | Ion    |
|----------|----------|------------|------------|--------------|--------|
| 210.1119 | 210.1125 | 0.55       | 2.61       | C11 H16 N O3 | (M+H)+ |

--- End Of Report ---

## Qualitative Analysis Report

|                        |                                        |                               |                             |
|------------------------|----------------------------------------|-------------------------------|-----------------------------|
| <b>Data Filename</b>   | ESI202102575.d                         | <b>Sample Name</b>            | G5-G5-4YB                   |
| <b>Sample ID</b>       |                                        | <b>Position</b>               | P1-B8                       |
| <b>Instrument Name</b> | Agilent G6520 Q-TOF                    | <b>Acq Method</b>             | 20160322_MS_ESIH_POS_1min.m |
| <b>Acquired Time</b>   | 5/13/2021 11:50:16                     | <b>IRM Calibration Status</b> | Success                     |
| <b>DA Method</b>       | small molecular data analysis method.m | <b>Comment</b>                | ESIH by zhuzhenyun          |

### User Spectra

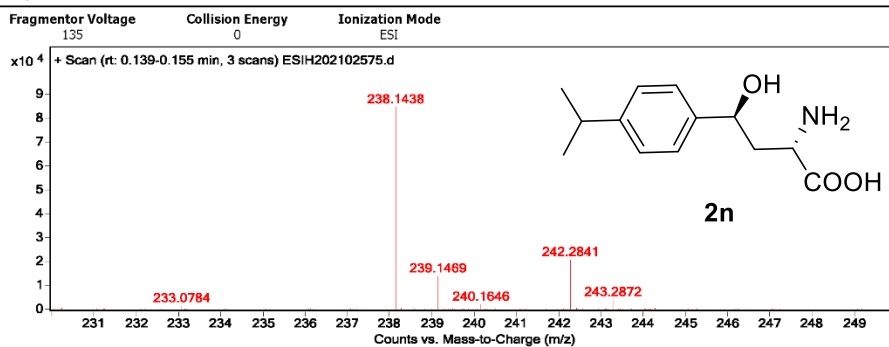

### Formula Calculator Results

| m/z      | Calc m/z | Diff (mDa) | Diff (ppm) | Ion Formula  | Ion    |
|----------|----------|------------|------------|--------------|--------|
| 238.1438 | 238.1438 | -0.04      | -0.17      | C13 H20 N O3 | (M+H)+ |

--- End Of Report ---

## Qualitative Analysis Report

|                        |                                        |                               |                             |
|------------------------|----------------------------------------|-------------------------------|-----------------------------|
| <b>Data Filename</b>   | ESI202102299.d                         | <b>Sample Name</b>            | G5-AP-2NO2                  |
| <b>Sample ID</b>       |                                        | <b>Position</b>               | P2-B6                       |
| <b>Instrument Name</b> | Agilent G6520 Q-TOF                    | <b>Acq Method</b>             | 20160322_MS_ESIH_POS_1min.m |
| <b>Acquired Time</b>   | 4/27/2021 18:31:32                     | <b>IRM Calibration Status</b> | Success                     |
| <b>DA Method</b>       | small molecular data analysis method.m | <b>Comment</b>                | ESIH by zhuzhenyun          |

### User Spectra

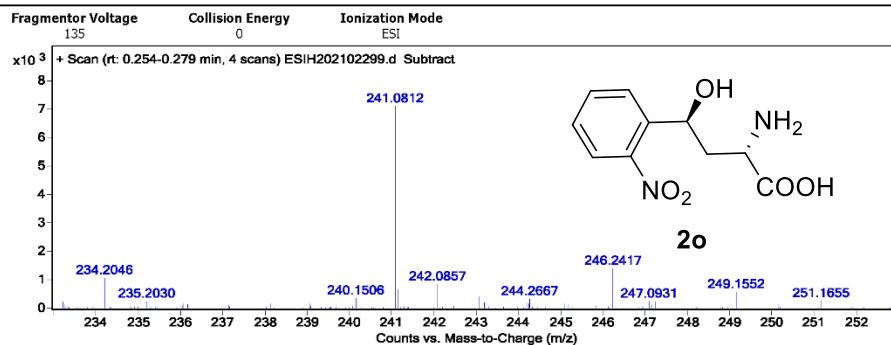

### Formula Calculator Results

| m/z      | Calc m/z | Diff (mDa) | Diff (ppm) | Ion Formula   | Ion    |
|----------|----------|------------|------------|---------------|--------|
| 241.0812 | 241.0819 | 0.67       | 2.79       | C10 H13 N2 O5 | (M+H)+ |

--- End Of Report ---

## Qualitative Analysis Report

|                        |                                        |                               |                             |
|------------------------|----------------------------------------|-------------------------------|-----------------------------|
| <b>Data Filename</b>   | ESI202102300.d                         | <b>Sample Name</b>            | G5-AP-3NO2                  |
| <b>Sample ID</b>       |                                        | <b>Position</b>               | P2-B7                       |
| <b>Instrument Name</b> | Agilent G6520 Q-TOF                    | <b>Acq Method</b>             | 20160322_MS_ESIH_POS_1min.m |
| <b>Acquired Time</b>   | 4/27/2021 18:33:00                     | <b>IRM Calibration Status</b> | Success                     |
| <b>DA Method</b>       | small molecular data analysis method.m | <b>Comment</b>                | ESIH by zhuzhenyun          |

### User Spectra

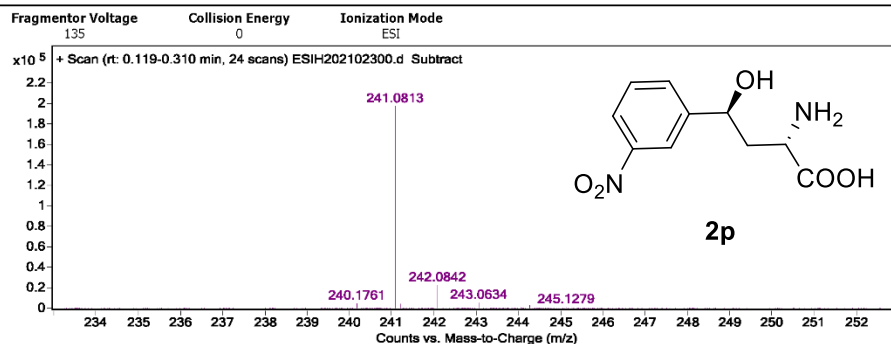

### Formula Calculator Results

| m/z      | Calc m/z | Diff (mDa) | Diff (ppm) | Ion Formula   | Ion    |
|----------|----------|------------|------------|---------------|--------|
| 241.0813 | 241.0819 | 0.63       | 2.61       | C10 H13 N2 O5 | (M+H)+ |

--- End Of Report ---

## Qualitative Analysis Report

|                        |                                        |                               |                             |
|------------------------|----------------------------------------|-------------------------------|-----------------------------|
| <b>Data Filename</b>   | ESI202102301.d                         | <b>Sample Name</b>            | G5-AP-4NQ2                  |
| <b>Sample ID</b>       |                                        | <b>Position</b>               | P2-B8                       |
| <b>Instrument Name</b> | Agilent G6520 Q-TOF                    | <b>Acq Method</b>             | 20160322_MS_ESIH_POS_1min.m |
| <b>Acquired Time</b>   | 4/27/2021 18:34:28                     | <b>IRM Calibration Status</b> | Success                     |
| <b>DA Method</b>       | small molecular data analysis method.m | <b>Comment</b>                | ESIH by zhuzhenyun          |

### User Spectra

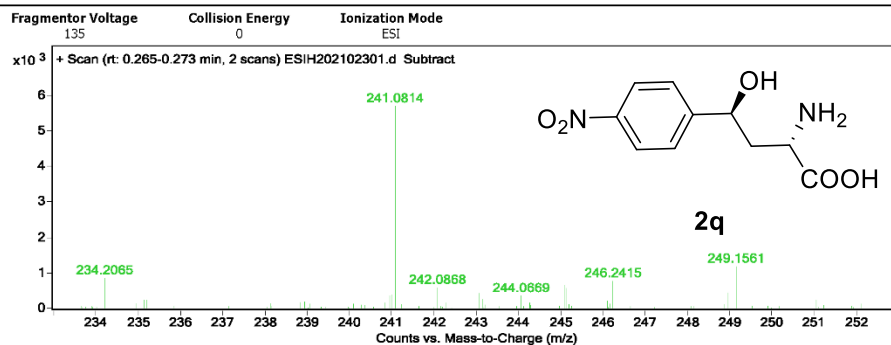

### Formula Calculator Results

| m/z      | Calc m/z | Diff (mDa) | Diff (ppm) | Ion Formula   | Ion    |
|----------|----------|------------|------------|---------------|--------|
| 241.0814 | 241.0819 | 0.45       | 1.88       | C10 H13 N2 O5 | (M+H)+ |

--- End Of Report ---

## Qualitative Analysis Report

|                        |                                        |                               |                             |
|------------------------|----------------------------------------|-------------------------------|-----------------------------|
| <b>Data Filename</b>   | ESI202102302.d                         | <b>Sample Name</b>            | G5-AP-3-3F                  |
| <b>Sample ID</b>       |                                        | <b>Position</b>               | P2-B9                       |
| <b>Instrument Name</b> | Agilent G6520 Q-TOF                    | <b>Acq Method</b>             | 20160322_MS_ESIH_POS_1min.m |
| <b>Acquired Time</b>   | 4/27/2021 18:35:55                     | <b>IRM Calibration Status</b> | Success                     |
| <b>DA Method</b>       | small molecular data analysis method.m | <b>Comment</b>                | ESIH by zhuzhenyun          |

### User Spectra

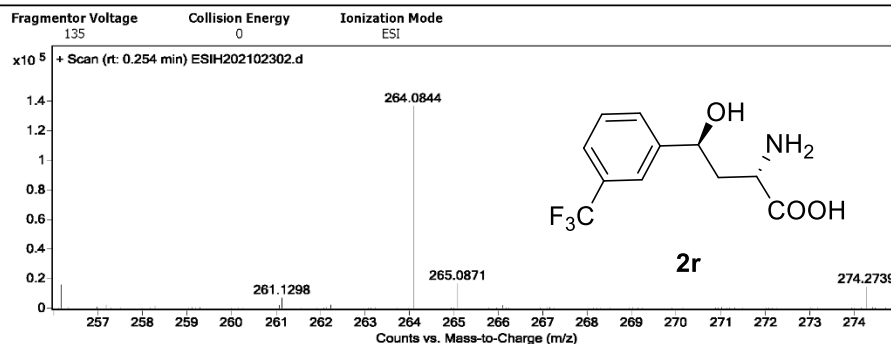

### Formula Calculator Results

| m/z      | Calc m/z | Diff (mDa) | Diff (ppm) | Ion Formula     | Ion    |
|----------|----------|------------|------------|-----------------|--------|
| 264.0844 | 264.0842 | -0.17      | -0.66      | C11 H13 F3 N O3 | (M+H)+ |

--- End Of Report ---

## Qualitative Analysis Report

|                        |                                        |                               |                             |
|------------------------|----------------------------------------|-------------------------------|-----------------------------|
| <b>Data Filename</b>   | ESI202102303.d                         | <b>Sample Name</b>            | G5-AP-4-3F                  |
| <b>Sample ID</b>       |                                        | <b>Position</b>               | P2-C1                       |
| <b>Instrument Name</b> | Agilent G6520 Q-TOF                    | <b>Acq Method</b>             | 20160322_MS_ESIH_POS_1min.m |
| <b>Acquired Time</b>   | 4/27/2021 18:37:20                     | <b>IRM Calibration Status</b> | Success                     |
| <b>DA Method</b>       | small molecular data analysis method.m | <b>Comment</b>                | ESIH by zhuzhenyun          |

### User Spectra

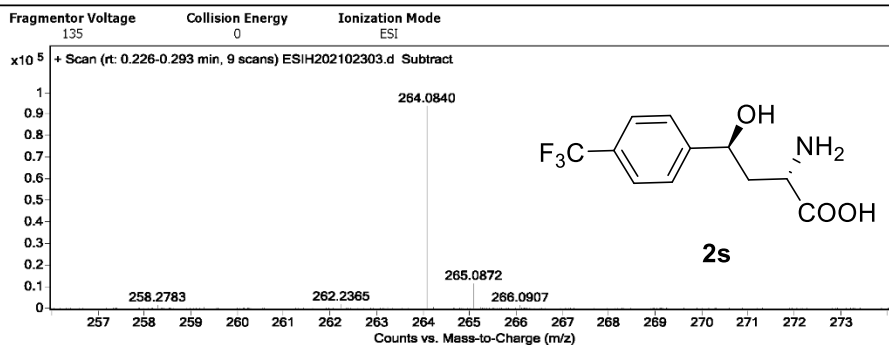

### Formula Calculator Results

| m/z     | Calc m/z | Diff (mDa) | Diff (ppm) | Ion Formula     | Ion    |
|---------|----------|------------|------------|-----------------|--------|
| 264.084 | 264.0842 | 0.18       | 0.69       | C11 H13 F3 N O3 | (M+H)+ |

--- End Of Report ---

## Qualitative Analysis Report

|                        |                                        |                               |                             |
|------------------------|----------------------------------------|-------------------------------|-----------------------------|
| <b>Data Filename</b>   | ESI202102572.d                         | <b>Sample Name</b>            | G5-G5-3QJ                   |
| <b>Sample ID</b>       |                                        | <b>Position</b>               | P1-B5                       |
| <b>Instrument Name</b> | Agilent G6520 Q-TOF                    | <b>Acq Method</b>             | 20160322_MS_ESIH_POS_1min.m |
| <b>Acquired Time</b>   | 5/13/2021 11:46:25                     | <b>IRM Calibration Status</b> | Success                     |
| <b>DA Method</b>       | small molecular data analysis method.m | <b>Comment</b>                | ESIH by zhuzhenyun          |

### User Spectra

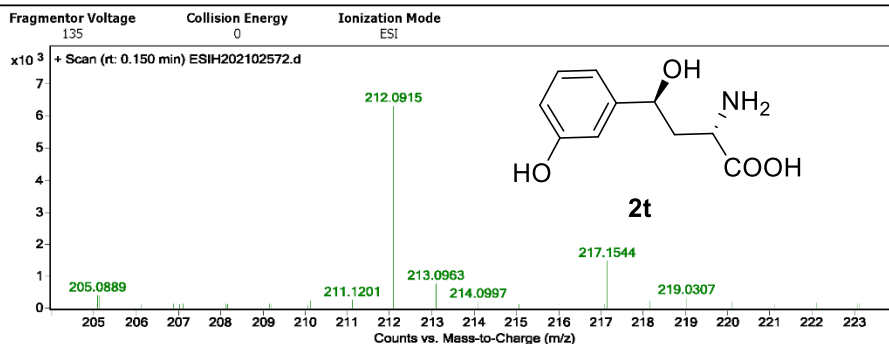

### Formula Calculator Results

| m/z      | Calc m/z | Diff (mDa) | Diff (ppm) | Ion Formula  | Ion    |
|----------|----------|------------|------------|--------------|--------|
| 212.0915 | 212.0917 | 0.23       | 1.07       | C10 H14 N O4 | (M+H)+ |

--- End Of Report ---



## Qualitative Analysis Report

|                        |                                        |                               |                             |
|------------------------|----------------------------------------|-------------------------------|-----------------------------|
| <b>Data Filename</b>   | ESI202102571.d                         | <b>Sample Name</b>            | G5-G5-3SF                   |
| <b>Sample ID</b>       |                                        | <b>Position</b>               | P1-B4                       |
| <b>Instrument Name</b> | Agilent G6520 Q-TOF                    | <b>Acq Method</b>             | 20160322_MS_ESIH_POS_1min.m |
| <b>Acquired Time</b>   | 5/13/2021 11:45:08                     | <b>IRM Calibration Status</b> | Success                     |
| <b>DA Method</b>       | small molecular data analysis method.m | <b>Comment</b>                | ESIH by zhuzhenyun          |

### User Spectra

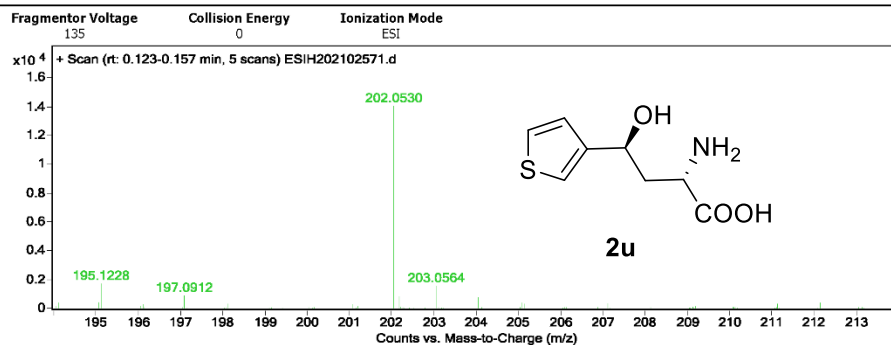

### Formula Calculator Results

| m/z     | Calc m/z | Diff (mDa) | Diff (ppm) | Ion Formula   | Ion    |
|---------|----------|------------|------------|---------------|--------|
| 202.053 | 202.0532 | 0.19       | 0.96       | C8 H12 N O3 S | (M+H)+ |

--- End Of Report ---

## Qualitative Analysis Report

|                        |                                        |                               |                             |
|------------------------|----------------------------------------|-------------------------------|-----------------------------|
| <b>Data Filename</b>   | ESI202102568.d                         | <b>Sample Name</b>            | G5-2BD                      |
| <b>Sample ID</b>       |                                        | <b>Position</b>               | P1-B1                       |
| <b>Instrument Name</b> | Agilent G6520 Q-TOF                    | <b>Acq Method</b>             | 20160322_MS_ESIH_POS_1min.m |
| <b>Acquired Time</b>   | 5/13/2021 11:41:17                     | <b>IRM Calibration Status</b> | Success                     |
| <b>DA Method</b>       | small molecular data analysis method.m | <b>Comment</b>                | ESIH by zhuzhenyun          |

### User Spectra

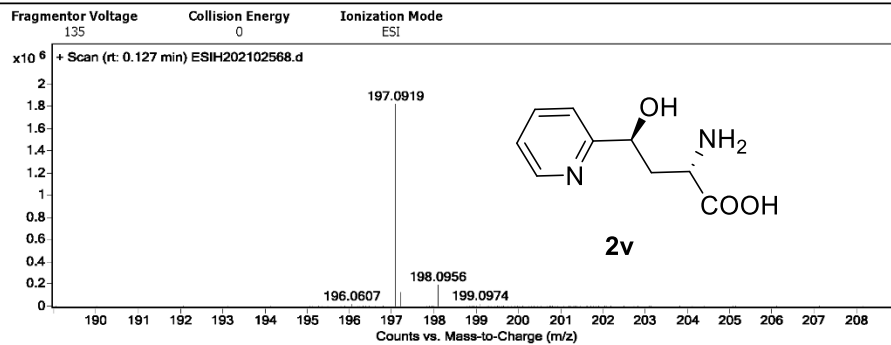

### Formula Calculator Results

| m/z      | Calc m/z | Diff (mDa) | Diff (ppm) | Ion Formula  | Ion    |
|----------|----------|------------|------------|--------------|--------|
| 197.0919 | 197.0921 | 0.12       | 0.61       | C9 H13 N2 O3 | (M+H)+ |

--- End Of Report ---

## Qualitative Analysis Report

**Data Filename** ESIH202102569.d  
**Sample ID**  
**Instrument Name** Agilent G6520 Q-TOF  
**Acquired Time** 5/13/2021 11:42:34  
**DA Method** small molecular data analysis method.m

**Sample Name** G5-3BD  
**Position** P1-B2  
**Acq Method** 20160322\_MS\_ESIH\_POS\_1min.m  
**IRM Calibration Status** Success  
**Comment** ESIH by zhuzhenyun

### User Spectra

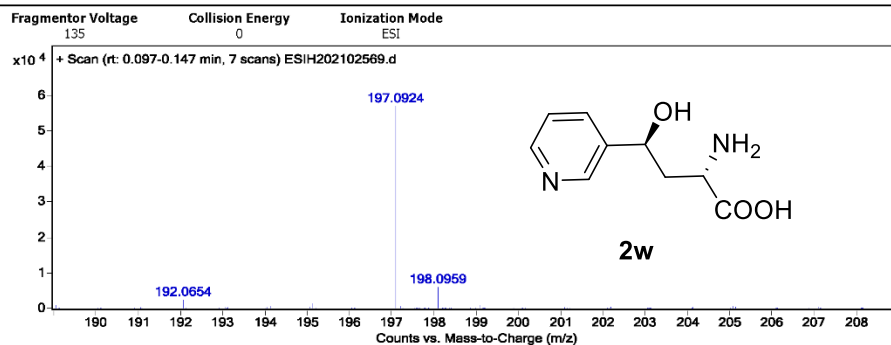

### Formula Calculator Results

| m/z      | Calc m/z | Diff (mDa) | Diff (ppm) | Ion Formula                                                  | Ion                |
|----------|----------|------------|------------|--------------------------------------------------------------|--------------------|
| 197.0924 | 197.0921 | -0.37      | -1.88      | C <sub>9</sub> H <sub>13</sub> N <sub>2</sub> O <sub>3</sub> | (M+H) <sup>+</sup> |

--- End Of Report ---

## Qualitative Analysis Report

**Data Filename** ESIH202102570.d  
**Sample ID**  
**Instrument Name** Agilent G6520 Q-TOF  
**Acquired Time** 5/13/2021 11:43:51  
**DA Method** small molecular data analysis method.m

**Sample Name** G5-4BD  
**Position** P1-B3  
**Acq Method** 20160322\_MS\_ESIH\_POS\_1min.m  
**IRM Calibration Status** Success  
**Comment** ESIH by zhuzhenyun

### User Spectra

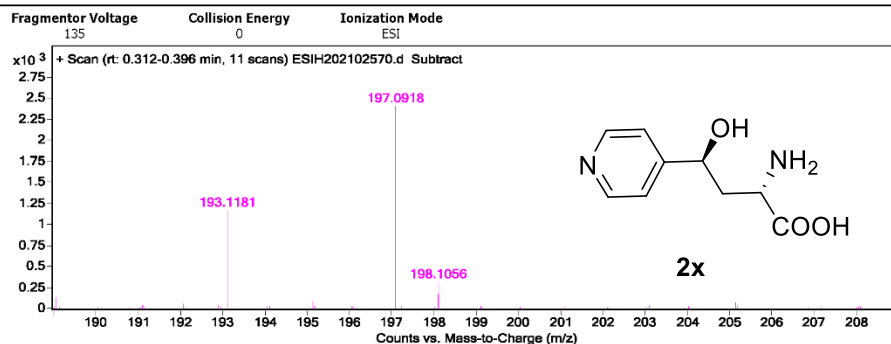

### Formula Calculator Results

| m/z      | Calc m/z | Diff (mDa) | Diff (ppm) | Ion Formula                                                  | Ion                |
|----------|----------|------------|------------|--------------------------------------------------------------|--------------------|
| 197.0918 | 197.0921 | 0.23       | 1.18       | C <sub>9</sub> H <sub>13</sub> N <sub>2</sub> O <sub>3</sub> | (M+H) <sup>+</sup> |

--- End Of Report ---

## Qualitative Analysis Report

|                        |                                        |                               |                             |
|------------------------|----------------------------------------|-------------------------------|-----------------------------|
| <b>Data Filename</b>   | ESI202102574.d                         | <b>Sample Name</b>            | G5-G5-BYQ                   |
| <b>Sample ID</b>       |                                        | <b>Position</b>               | P1-B7                       |
| <b>Instrument Name</b> | Agilent G6520 Q-TOF                    | <b>Acq Method</b>             | 20160322_MS_ESIH_POS_1min.m |
| <b>Acquired Time</b>   | 5/13/2021 11:49:00                     | <b>IRM Calibration Status</b> | Success                     |
| <b>DA Method</b>       | small molecular data analysis method.m | <b>Comment</b>                | ESIH by zhuzhenyun          |

### User Spectra

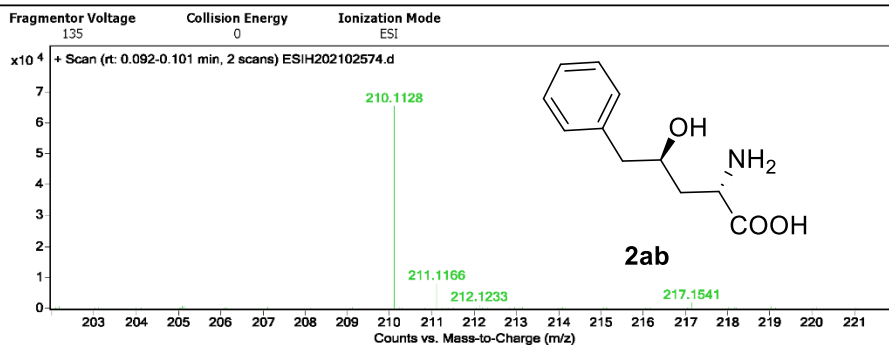

### Formula Calculator Results

| m/z      | Calc m/z | Diff (mDa) | Diff (ppm) | Ion Formula  | Ion    |
|----------|----------|------------|------------|--------------|--------|
| 210.1128 | 210.1125 | -0.32      | -1.54      | C11 H16 N O3 | (M+H)+ |

--- End Of Report ---

## Qualitative Analysis Report

|                        |                                        |                               |                             |
|------------------------|----------------------------------------|-------------------------------|-----------------------------|
| <b>Data Filename</b>   | ESI202102681.d                         | <b>Sample Name</b>            | G5-G5-PFK-BJQ               |
| <b>Sample ID</b>       |                                        | <b>Position</b>               | P1-B5                       |
| <b>Instrument Name</b> | Agilent G6520 Q-TOF                    | <b>Acq Method</b>             | 20160322_MS_ESIH_POS_1min.m |
| <b>Acquired Time</b>   | 5/17/2021 19:29:24                     | <b>IRM Calibration Status</b> | Success                     |
| <b>DA Method</b>       | small molecular data analysis method.m | <b>Comment</b>                | ESIH by zhuzhenyun          |

### User Spectra

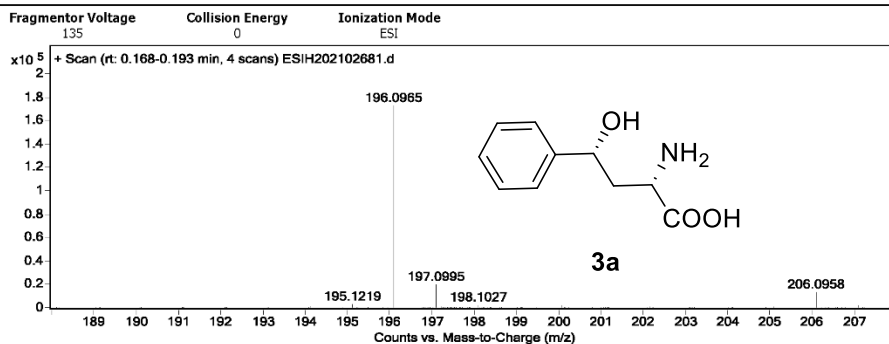

### Formula Calculator Results

| m/z      | Calc m/z | Diff (mDa) | Diff (ppm) | Ion Formula  | Ion    |
|----------|----------|------------|------------|--------------|--------|
| 196.0965 | 196.0968 | 0.34       | 1.73       | C10 H14 N O3 | (M+H)+ |

--- End Of Report ---

## Qualitative Analysis Report

|                        |                                        |                               |                             |
|------------------------|----------------------------------------|-------------------------------|-----------------------------|
| <b>Data Filename</b>   | ESI202102682.d                         | <b>Sample Name</b>            | G5-G5-PFK-2F                |
| <b>Sample ID</b>       |                                        | <b>Position</b>               | P1-B6                       |
| <b>Instrument Name</b> | Agilent G6520 Q-TOF                    | <b>Acq Method</b>             | 20160322_MS_ESIH_POS_1min.m |
| <b>Acquired Time</b>   | 5/17/2021 19:30:41                     | <b>IRM Calibration Status</b> | Success                     |
| <b>DA Method</b>       | small molecular data analysis method.m | <b>Comment</b>                | ESIH by zhuzhenyun          |

### User Spectra

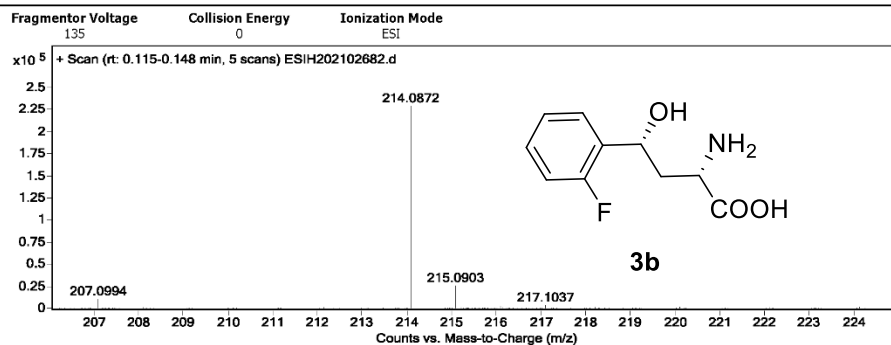

### Formula Calculator Results

| m/z      | Calc m/z | Diff (mDa) | Diff (ppm) | Ion Formula    | Ion    |
|----------|----------|------------|------------|----------------|--------|
| 214.0872 | 214.0874 | 0.19       | 0.87       | C10 H13 F N O3 | (M+H)+ |

--- End Of Report ---

## Qualitative Analysis Report

|                        |                                        |                               |                             |
|------------------------|----------------------------------------|-------------------------------|-----------------------------|
| <b>Data Filename</b>   | ESI202102683.d                         | <b>Sample Name</b>            | G5-G5-PFK-3F                |
| <b>Sample ID</b>       |                                        | <b>Position</b>               | P1-B7                       |
| <b>Instrument Name</b> | Agilent G6520 Q-TOF                    | <b>Acq Method</b>             | 20160322_MS_ESIH_POS_1min.m |
| <b>Acquired Time</b>   | 5/17/2021 19:31:58                     | <b>IRM Calibration Status</b> | Success                     |
| <b>DA Method</b>       | small molecular data analysis method.m | <b>Comment</b>                | ESIH by zhuzhenyun          |

### User Spectra

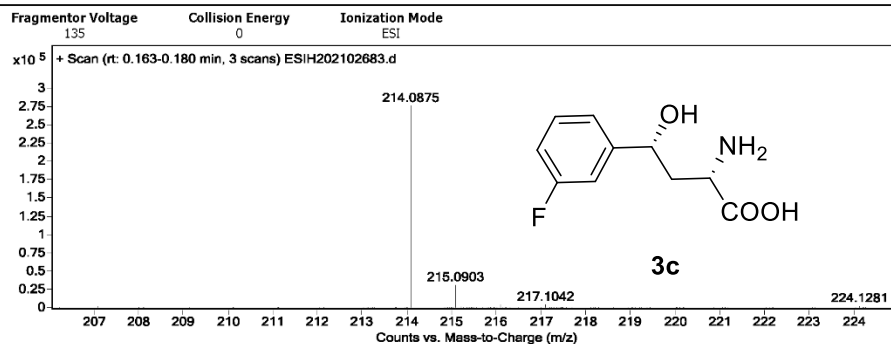

### Formula Calculator Results

| m/z      | Calc m/z | Diff (mDa) | Diff (ppm) | Ion Formula    | Ion    |
|----------|----------|------------|------------|----------------|--------|
| 214.0875 | 214.0874 | -0.14      | -0.63      | C10 H13 F N O3 | (M+H)+ |

--- End Of Report ---

## Qualitative Analysis Report

|                        |                                        |                               |                             |
|------------------------|----------------------------------------|-------------------------------|-----------------------------|
| <b>Data Filename</b>   | ESI202102685.d                         | <b>Sample Name</b>            | G5-G5-PFK-4F                |
| <b>Sample ID</b>       |                                        | <b>Position</b>               | P1-B9                       |
| <b>Instrument Name</b> | Agilent G6520 Q-TOF                    | <b>Acq Method</b>             | 20160322_MS_ESIH_POS_1min.m |
| <b>Acquired Time</b>   | 5/17/2021 19:34:30                     | <b>IRM Calibration Status</b> | Success                     |
| <b>DA Method</b>       | small molecular data analysis method.m | <b>Comment</b>                | ESIH by zhuzhenyun          |

### User Spectra

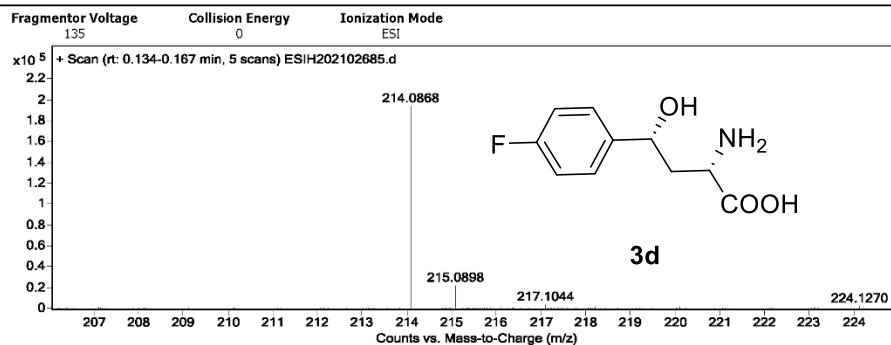

### Formula Calculator Results

| m/z      | Calc m/z | Diff (mDa) | Diff (ppm) | Ion Formula    | Ion    |
|----------|----------|------------|------------|----------------|--------|
| 214.0868 | 214.0874 | 0.62       | 2.89       | C10 H13 F N O3 | (M+H)+ |

--- End Of Report ---

## Qualitative Analysis Report

|                        |                                        |                               |                             |
|------------------------|----------------------------------------|-------------------------------|-----------------------------|
| <b>Data Filename</b>   | ESI202102686.d                         | <b>Sample Name</b>            | G5-G5-PFK-2CL               |
| <b>Sample ID</b>       |                                        | <b>Position</b>               | P1-C1                       |
| <b>Instrument Name</b> | Agilent G6520 Q-TOF                    | <b>Acq Method</b>             | 20160322_MS_ESIH_POS_1min.m |
| <b>Acquired Time</b>   | 5/17/2021 19:35:44                     | <b>IRM Calibration Status</b> | Success                     |
| <b>DA Method</b>       | small molecular data analysis method.m | <b>Comment</b>                | ESIH by zhuzhenyun          |

### User Spectra

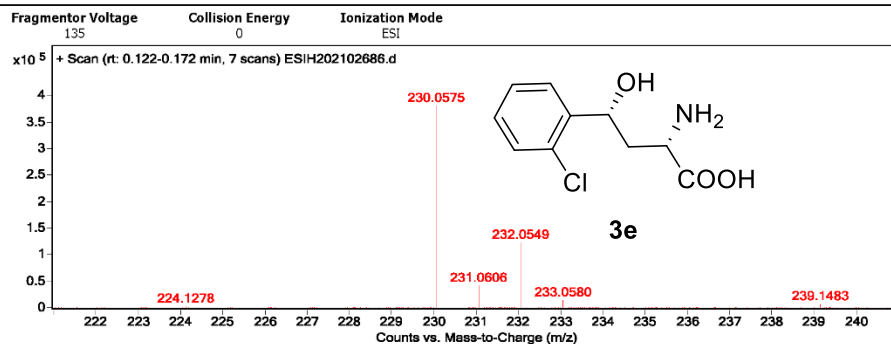

### Formula Calculator Results

| m/z      | Calc m/z | Diff (mDa) | Diff (ppm) | Ion Formula     | Ion    |
|----------|----------|------------|------------|-----------------|--------|
| 230.0575 | 230.0578 | 0.31       | 1.36       | C10 H13 Cl N O3 | (M+H)+ |

--- End Of Report ---

## Qualitative Analysis Report

**Data Filename** ESIH202102687.d  
**Sample ID**  
**Instrument Name** Agilent G6520 Q-TOF  
**Acquired Time** 5/17/2021 19:37:01  
**DA Method** small molecular data analysis method.m

**Sample Name** G5-G5-PFK-3CL  
**Position** P1-C2  
**Acq Method** 20160322\_MS\_ESIH\_POS\_1min.m  
**IRM Calibration Status** Success  
**Comment** ESIH by zhuzhenyun

### User Spectra

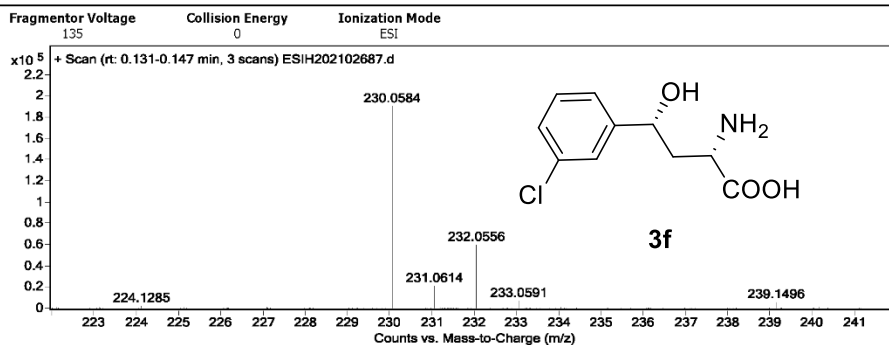

### Formula Calculator Results

| m/z      | Calc m/z | Diff (mDa) | Diff (ppm) | Ion Formula     | Ion    |
|----------|----------|------------|------------|-----------------|--------|
| 230.0584 | 230.0578 | -0.57      | -2.47      | C10 H13 Cl N O3 | (M+H)+ |

--- End Of Report ---

## Qualitative Analysis Report

**Data Filename** ESIH202102688.d  
**Sample ID**  
**Instrument Name** Agilent G6520 Q-TOF  
**Acquired Time** 5/17/2021 19:38:17  
**DA Method** small molecular data analysis method.m

**Sample Name** G5-G5-PFK-4CL  
**Position** P1-C3  
**Acq Method** 20160322\_MS\_ESIH\_POS\_1min.m  
**IRM Calibration Status** Success  
**Comment** ESIH by zhuzhenyun

### User Spectra

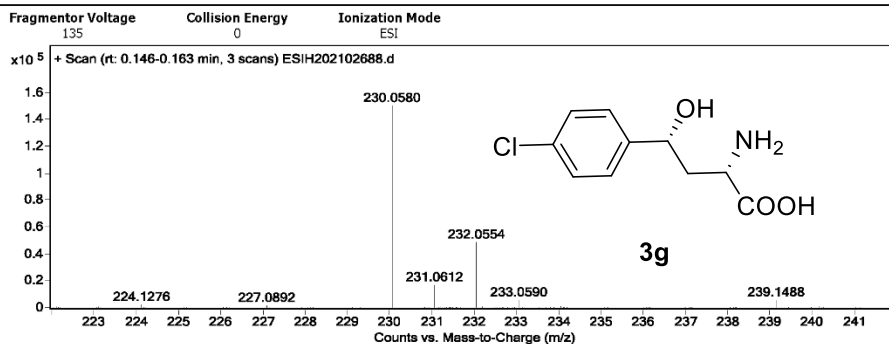

### Formula Calculator Results

| m/z      | Calc m/z | Diff (mDa) | Diff (ppm) | Ion Formula     | Ion    |
|----------|----------|------------|------------|-----------------|--------|
| 230.0580 | 230.0578 | -0.18      | -0.8       | C10 H13 Cl N O3 | (M+H)+ |

--- End Of Report ---

## Qualitative Analysis Report

|                                                                                                                                                                                                              |                                                                                                                                                                                          |  |
|--------------------------------------------------------------------------------------------------------------------------------------------------------------------------------------------------------------|------------------------------------------------------------------------------------------------------------------------------------------------------------------------------------------|--|
| <b>Data Filename</b> ESIH202102689.d<br><b>Sample ID</b><br><b>Instrument Name</b> Agilent G6520 Q-TOF<br><b>Acquired Time</b> 5/17/2021 19:39:34<br><b>DA Method</b> small molecular data analysis method.m | <b>Sample Name</b> G5-G5-PFK-2BR<br><b>Position</b> P1-C4<br><b>Acq Method</b> 20160322_MS_ESIH_POS_1min.m<br><b>IRM Calibration Status</b> Success<br><b>Comment</b> ESIH by zhuzhenyun |  |
|--------------------------------------------------------------------------------------------------------------------------------------------------------------------------------------------------------------|------------------------------------------------------------------------------------------------------------------------------------------------------------------------------------------|--|

### User Spectra

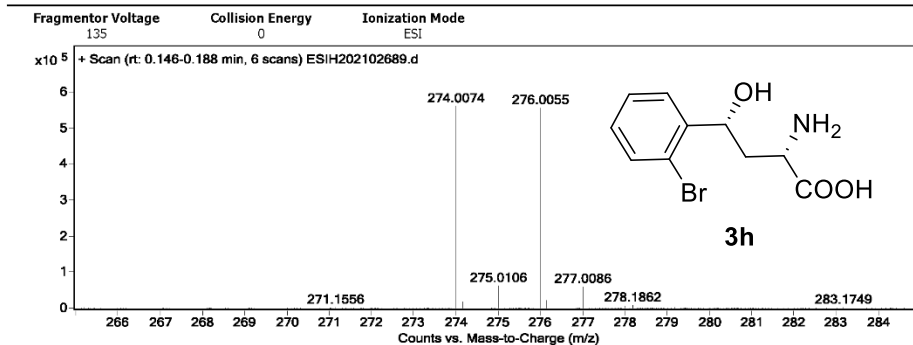

### Formula Calculator Results

| m/z      | Calc m/z | Diff (mDa) | Diff (ppm) | Ion Formula     | Ion    |
|----------|----------|------------|------------|-----------------|--------|
| 274.0074 | 274.0073 | -0.08      | -0.28      | C10 H13 Br N O3 | (M+H)+ |

--- End Of Report ---

## Qualitative Analysis Report

|                                                                                                                                                                                                              |                                                                                                                                                                                          |  |
|--------------------------------------------------------------------------------------------------------------------------------------------------------------------------------------------------------------|------------------------------------------------------------------------------------------------------------------------------------------------------------------------------------------|--|
| <b>Data Filename</b> ESIH202102690.d<br><b>Sample ID</b><br><b>Instrument Name</b> Agilent G6520 Q-TOF<br><b>Acquired Time</b> 5/17/2021 19:40:51<br><b>DA Method</b> small molecular data analysis method.m | <b>Sample Name</b> G5-G5-PFK-3BR<br><b>Position</b> P1-C5<br><b>Acq Method</b> 20160322_MS_ESIH_POS_1min.m<br><b>IRM Calibration Status</b> Success<br><b>Comment</b> ESIH by zhuzhenyun |  |
|--------------------------------------------------------------------------------------------------------------------------------------------------------------------------------------------------------------|------------------------------------------------------------------------------------------------------------------------------------------------------------------------------------------|--|

### User Spectra

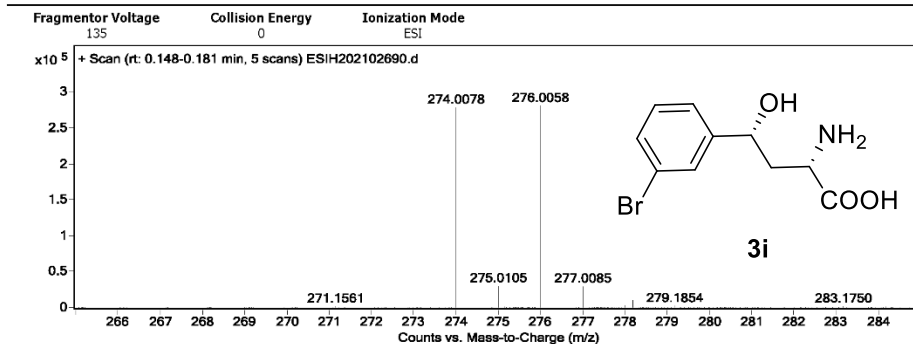

### Formula Calculator Results

| m/z      | Calc m/z | Diff (mDa) | Diff (ppm) | Ion Formula     | Ion    |
|----------|----------|------------|------------|-----------------|--------|
| 274.0078 | 274.0073 | -0.42      | -1.53      | C10 H13 Br N O3 | (M+H)+ |

--- End Of Report ---

## Qualitative Analysis Report

|                        |                                        |                               |                             |
|------------------------|----------------------------------------|-------------------------------|-----------------------------|
| <b>Data Filename</b>   | ESI202102691.d                         | <b>Sample Name</b>            | G5-G5-PFK-4BR               |
| <b>Sample ID</b>       |                                        | <b>Position</b>               | P1-C6                       |
| <b>Instrument Name</b> | Agilent G6520 Q-TOF                    | <b>Acq Method</b>             | 20160322_MS_ESIH_POS_1min.m |
| <b>Acquired Time</b>   | 5/17/2021 19:42:08                     | <b>IRM Calibration Status</b> | Success                     |
| <b>DA Method</b>       | small molecular data analysis method.m | <b>Comment</b>                | ESIH by zhuzhenyun          |

### User Spectra

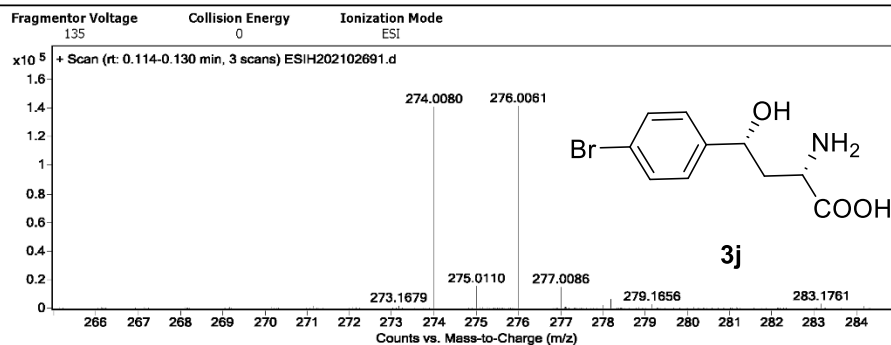

### Formula Calculator Results

| m/z     | Calc m/z | Diff (mDa) | Diff (ppm) | Ion Formula     | Ion    |
|---------|----------|------------|------------|-----------------|--------|
| 274.008 | 274.0073 | -0.66      | -2.42      | C10 H13 Br N O3 | (M+H)+ |

--- End Of Report ---

## Qualitative Analysis Report

|                        |                                        |                               |                             |
|------------------------|----------------------------------------|-------------------------------|-----------------------------|
| <b>Data Filename</b>   | ESI202102692.d                         | <b>Sample Name</b>            | G5-G5-PFK-2JJ               |
| <b>Sample ID</b>       |                                        | <b>Position</b>               | P1-C7                       |
| <b>Instrument Name</b> | Agilent G6520 Q-TOF                    | <b>Acq Method</b>             | 20160322_MS_ESIH_POS_1min.m |
| <b>Acquired Time</b>   | 5/17/2021 19:43:26                     | <b>IRM Calibration Status</b> | Success                     |
| <b>DA Method</b>       | small molecular data analysis method.m | <b>Comment</b>                | ESIH by zhuzhenyun          |

### User Spectra

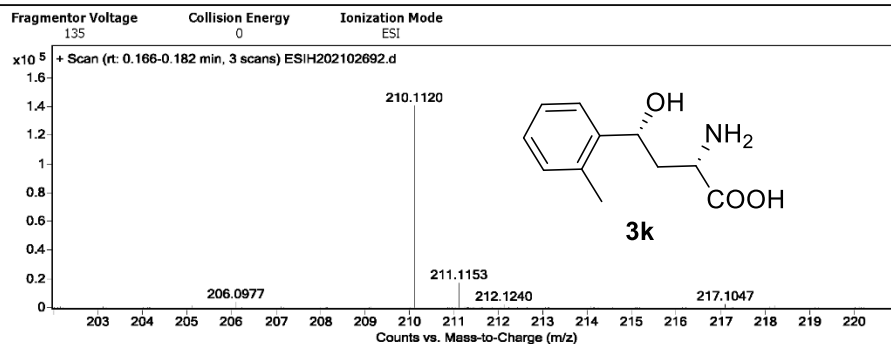

### Formula Calculator Results

| m/z     | Calc m/z | Diff (mDa) | Diff (ppm) | Ion Formula  | Ion    |
|---------|----------|------------|------------|--------------|--------|
| 210.112 | 210.1125 | 0.52       | 2.46       | C11 H16 N O3 | (M+H)+ |

--- End Of Report ---



## Qualitative Analysis Report

|                                                         |                                               |
|---------------------------------------------------------|-----------------------------------------------|
| <b>Data Filename</b> ESIH202102693.d                    | <b>Sample Name</b> G5-G5-PFK-3JJ              |
| <b>Sample ID</b>                                        | <b>Position</b> P1-C8                         |
| <b>Instrument Name</b> Agilent G6520 Q-TOF              | <b>Acq Method</b> 20160322_MS_ESIH_POS_1min.m |
| <b>Acquired Time</b> 5/17/2021 19:44:43                 | <b>IRM Calibration Status</b> Success         |
| <b>DA Method</b> small molecular data analysis method.m | <b>Comment</b> ESIH by zhuzhenyun             |

### User Spectra

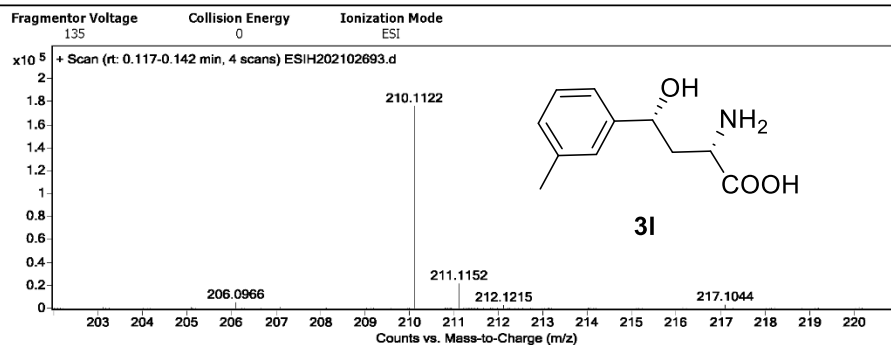

### Formula Calculator Results

| m/z      | Calc m/z | Diff (mDa) | Diff (ppm) | Ion Formula  | Ion    |
|----------|----------|------------|------------|--------------|--------|
| 210.1122 | 210.1125 | 0.22       | 1.05       | C11 H16 N O3 | (M+H)+ |

--- End Of Report ---

## Qualitative Analysis Report

|                                                         |                                               |
|---------------------------------------------------------|-----------------------------------------------|
| <b>Data Filename</b> ESIH202102694.d                    | <b>Sample Name</b> G5-G5-PFK-4JJ              |
| <b>Sample ID</b>                                        | <b>Position</b> P1-C9                         |
| <b>Instrument Name</b> Agilent G6520 Q-TOF              | <b>Acq Method</b> 20160322_MS_ESIH_POS_1min.m |
| <b>Acquired Time</b> 5/17/2021 19:46:00                 | <b>IRM Calibration Status</b> Success         |
| <b>DA Method</b> small molecular data analysis method.m | <b>Comment</b> ESIH by zhuzhenyun             |

### User Spectra

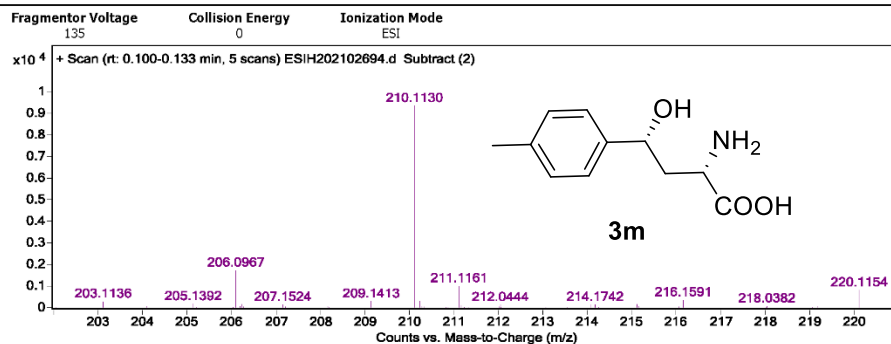

### Formula Calculator Results

| m/z     | Calc m/z | Diff (mDa) | Diff (ppm) | Ion Formula  | Ion    |
|---------|----------|------------|------------|--------------|--------|
| 210.113 | 210.1125 | -0.48      | -2.31      | C11 H16 N O3 | (M+H)+ |

--- End Of Report ---

## Qualitative Analysis Report

**Data Filename** ESIH202102695.d  
**Sample ID**  
**Instrument Name** Agilent G6520 Q-TOF  
**Acquired Time** 5/17/2021 19:47:16  
**DA Method** small molecular data analysis method.m

**Sample Name** G5-G5-PFK-2XJ  
**Position** P1-D1  
**Acq Method** 20160322\_MS\_ESIH\_POS\_1min.m  
**IRM Calibration Status** Success  
**Comment** ESIH by zhuzhenyun

### User Spectra

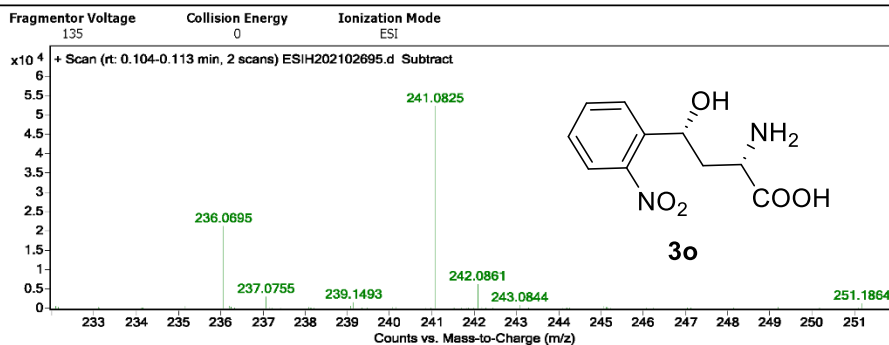

### Formula Calculator Results

| m/z      | Calc m/z | Diff (mDa) | Diff (ppm) | Ion Formula   | Ion    |
|----------|----------|------------|------------|---------------|--------|
| 241.0825 | 241.0819 | -0.65      | -2.7       | C10 H13 N2 O5 | (M+H)+ |

--- End Of Report ---

## Qualitative Analysis Report

**Data Filename** ESIH202102696.d  
**Sample ID**  
**Instrument Name** Agilent G6520 Q-TOF  
**Acquired Time** 5/17/2021 19:48:33  
**DA Method** small molecular data analysis method.m

**Sample Name** G5-G5-PFK-3XJ  
**Position** P1-D2  
**Acq Method** 20160322\_MS\_ESIH\_POS\_1min.m  
**IRM Calibration Status** Success  
**Comment** ESIH by zhuzhenyun

### User Spectra

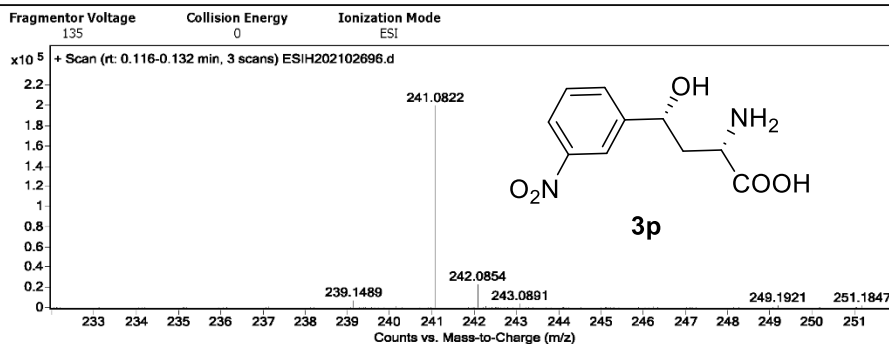

### Formula Calculator Results

| m/z      | Calc m/z | Diff (mDa) | Diff (ppm) | Ion Formula   | Ion    |
|----------|----------|------------|------------|---------------|--------|
| 241.0822 | 241.0819 | -0.28      | -1.16      | C10 H13 N2 O5 | (M+H)+ |

--- End Of Report ---

## Qualitative Analysis Report

|                        |                                        |                               |                             |
|------------------------|----------------------------------------|-------------------------------|-----------------------------|
| <b>Data Filename</b>   | ESI202102697.d                         | <b>Sample Name</b>            | G5-G5-PFK-4XJ               |
| <b>Sample ID</b>       |                                        | <b>Position</b>               | P1-D3                       |
| <b>Instrument Name</b> | Agilent G6520 Q-TOF                    | <b>Acq Method</b>             | 20160322_MS_ESIH_POS_1min.m |
| <b>Acquired Time</b>   | 5/17/2021 19:49:49                     | <b>IRM Calibration Status</b> | Success                     |
| <b>DA Method</b>       | small molecular data analysis method.m | <b>Comment</b>                | ESIH by zhuzhenyun          |

### User Spectra

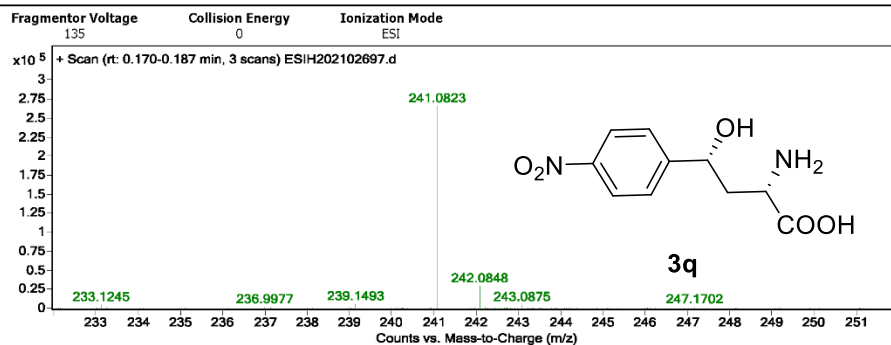

### Formula Calculator Results

| m/z      | Calc m/z | Diff (mDa) | Diff (ppm) | Ion Formula   | Ion    |
|----------|----------|------------|------------|---------------|--------|
| 241.0823 | 241.0819 | -0.38      | -1.57      | C10 H13 N2 O5 | (M+H)+ |

--- End Of Report ---

## Qualitative Analysis Report

|                        |                                        |                               |                             |
|------------------------|----------------------------------------|-------------------------------|-----------------------------|
| <b>Data Filename</b>   | ESI202102698.d                         | <b>Sample Name</b>            | G5-G5-PFK-3-3F              |
| <b>Sample ID</b>       |                                        | <b>Position</b>               | P1-D4                       |
| <b>Instrument Name</b> | Agilent G6520 Q-TOF                    | <b>Acq Method</b>             | 20160322_MS_ESIH_POS_1min.m |
| <b>Acquired Time</b>   | 5/17/2021 19:51:07                     | <b>IRM Calibration Status</b> | Success                     |
| <b>DA Method</b>       | small molecular data analysis method.m | <b>Comment</b>                | ESIH by zhuzhenyun          |

### User Spectra

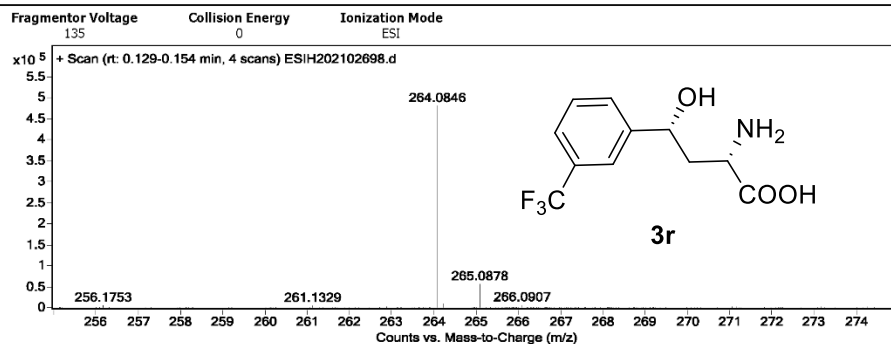

### Formula Calculator Results

| m/z      | Calc m/z | Diff (mDa) | Diff (ppm) | Ion Formula     | Ion    |
|----------|----------|------------|------------|-----------------|--------|
| 264.0846 | 264.0842 | -0.37      | -1.4       | C11 H13 F3 N O3 | (M+H)+ |

--- End Of Report ---

## Qualitative Analysis Report

|                        |                                        |                               |                             |
|------------------------|----------------------------------------|-------------------------------|-----------------------------|
| <b>Data Filename</b>   | ESI202102699.d                         | <b>Sample Name</b>            | G5-G5-PFK-4-3F              |
| <b>Sample ID</b>       |                                        | <b>Position</b>               | P1-D5                       |
| <b>Instrument Name</b> | Agilent G6520 Q-TOF                    | <b>Acq Method</b>             | 20160322_MS_ESIH_POS_1min.m |
| <b>Acquired Time</b>   | 5/17/2021 19:52:24                     | <b>IRM Calibration Status</b> | Success                     |
| <b>DA Method</b>       | small molecular data analysis method.m | <b>Comment</b>                | ESIH by zhuzhenyun          |

### User Spectra

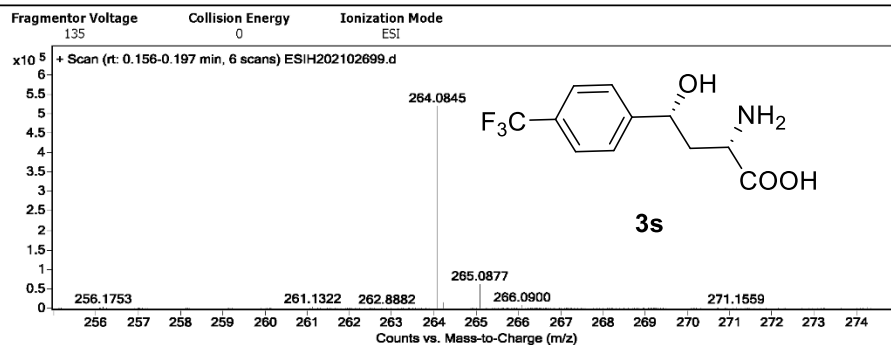

### Formula Calculator Results

| m/z      | Calc m/z | Diff (mDa) | Diff (ppm) | Ion Formula     | Ion    |
|----------|----------|------------|------------|-----------------|--------|
| 264.0845 | 264.0842 | -0.25      | -0.96      | C11 H13 F3 N O3 | (M+H)+ |

--- End Of Report ---

## Qualitative Analysis Report

|                        |                                        |                               |                             |
|------------------------|----------------------------------------|-------------------------------|-----------------------------|
| <b>Data Filename</b>   | ESI202102703.d                         | <b>Sample Name</b>            | G5-G5-PFK-2QJ               |
| <b>Sample ID</b>       |                                        | <b>Position</b>               | P1-D9                       |
| <b>Instrument Name</b> | Agilent G6520 Q-TOF                    | <b>Acq Method</b>             | 20160322_MS_ESIH_POS_1min.m |
| <b>Acquired Time</b>   | 5/17/2021 19:57:32                     | <b>IRM Calibration Status</b> | Success                     |
| <b>DA Method</b>       | small molecular data analysis method.m | <b>Comment</b>                | ESIH by zhuzhenyun          |

### User Spectra

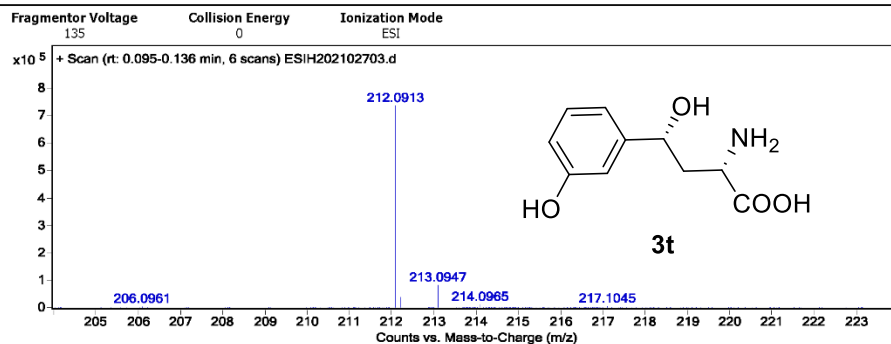

### Formula Calculator Results

| m/z      | Calc m/z | Diff (mDa) | Diff (ppm) | Ion Formula  | Ion    |
|----------|----------|------------|------------|--------------|--------|
| 212.0913 | 212.0917 | 0.42       | 1.98       | C10 H14 N O4 | (M+H)+ |

--- End Of Report ---

## Qualitative Analysis Report

|                        |                                        |                               |                             |
|------------------------|----------------------------------------|-------------------------------|-----------------------------|
| <b>Data Filename</b>   | ESI202102704.d                         | <b>Sample Name</b>            | G5-G5-PFK-35F               |
| <b>Sample ID</b>       |                                        | <b>Position</b>               | P1-E1                       |
| <b>Instrument Name</b> | Agilent G6520 Q-TOF                    | <b>Acq Method</b>             | 20160322_MS_ESIH_POS_1min.m |
| <b>Acquired Time</b>   | 5/17/2021 19:58:48                     | <b>IRM Calibration Status</b> | Success                     |
| <b>DA Method</b>       | small molecular data analysis method.m | <b>Comment</b>                | ESIH by zhuzhenyun          |

### User Spectra

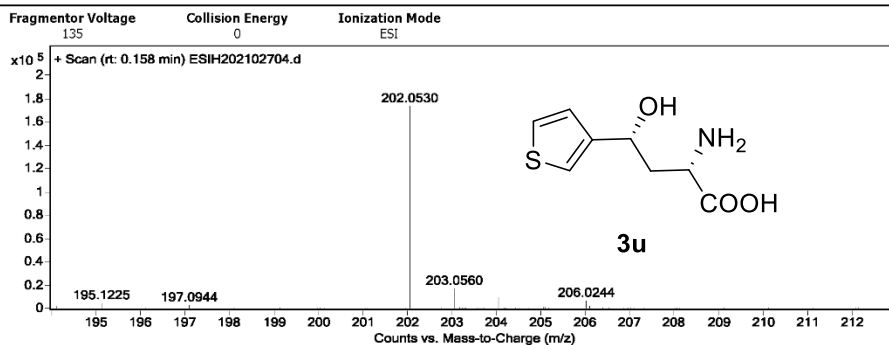

### Formula Calculator Results

| m/z     | Calc m/z | Diff (mDa) | Diff (ppm) | Ion Formula   | Ion    |
|---------|----------|------------|------------|---------------|--------|
| 202.053 | 202.0532 | 0.2        | 0.98       | C8 H12 N O3 S | (M+H)+ |

--- End Of Report ---

## Qualitative Analysis Report

|                        |                                        |                               |                             |
|------------------------|----------------------------------------|-------------------------------|-----------------------------|
| <b>Data Filename</b>   | ESI202102700.d                         | <b>Sample Name</b>            | G5-G5-PFK-2BD               |
| <b>Sample ID</b>       |                                        | <b>Position</b>               | P1-D6                       |
| <b>Instrument Name</b> | Agilent G6520 Q-TOF                    | <b>Acq Method</b>             | 20160322_MS_ESIH_POS_1min.m |
| <b>Acquired Time</b>   | 5/17/2021 19:53:40                     | <b>IRM Calibration Status</b> | Success                     |
| <b>DA Method</b>       | small molecular data analysis method.m | <b>Comment</b>                | ESIH by zhuzhenyun          |

### User Spectra

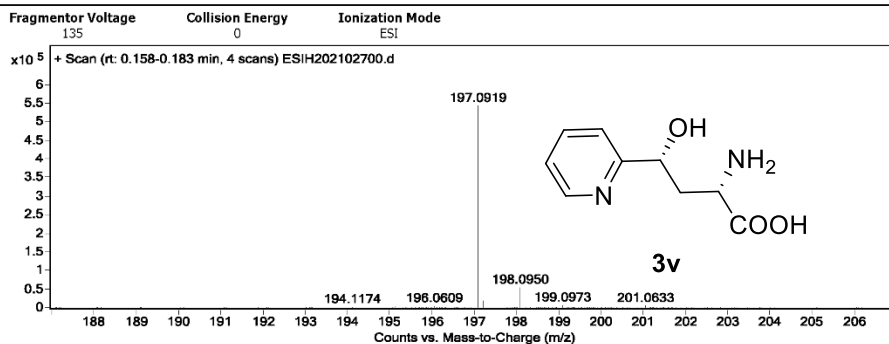

### Formula Calculator Results

| m/z      | Calc m/z | Diff (mDa) | Diff (ppm) | Ion Formula  | Ion    |
|----------|----------|------------|------------|--------------|--------|
| 197.0919 | 197.0921 | 0.13       | 0.66       | C9 H13 N2 O3 | (M+H)+ |

--- End Of Report ---

## Qualitative Analysis Report

|                        |                                        |                               |                             |
|------------------------|----------------------------------------|-------------------------------|-----------------------------|
| <b>Data Filename</b>   | ESI202102701.d                         | <b>Sample Name</b>            | G5-G5-PFK-3BD               |
| <b>Sample ID</b>       |                                        | <b>Position</b>               | P1-D7                       |
| <b>Instrument Name</b> | Agilent G6520 Q-TOF                    | <b>Acq Method</b>             | 20160322_MS_ESIH_POS_1min.m |
| <b>Acquired Time</b>   | 5/17/2021 19:54:58                     | <b>IRM Calibration Status</b> | Success                     |
| <b>DA Method</b>       | small molecular data analysis method.m | <b>Comment</b>                | ESIH by zhuzhenyun          |

### User Spectra

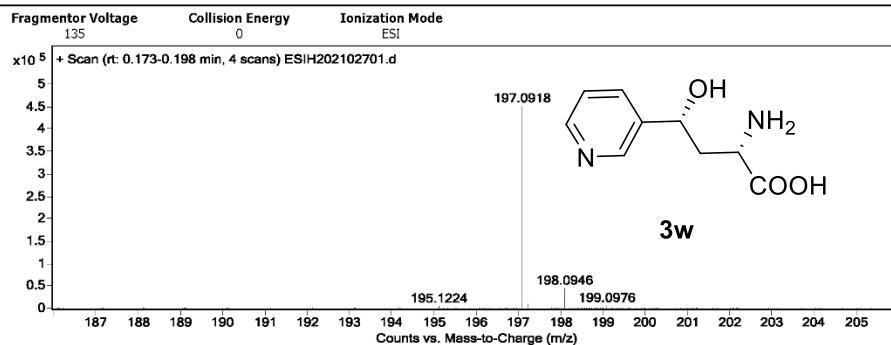

### Formula Calculator Results

| m/z      | Calc m/z | Diff (mDa) | Diff (ppm) | Ion Formula                                                  | Ion                |
|----------|----------|------------|------------|--------------------------------------------------------------|--------------------|
| 197.0918 | 197.0921 | 0.28       | 1.42       | C <sub>9</sub> H <sub>13</sub> N <sub>2</sub> O <sub>3</sub> | (M+H) <sup>+</sup> |

--- End Of Report ---

## Qualitative Analysis Report

|                        |                                        |                               |                             |
|------------------------|----------------------------------------|-------------------------------|-----------------------------|
| <b>Data Filename</b>   | ESI202102702.d                         | <b>Sample Name</b>            | G5-G5-PFK-4BD               |
| <b>Sample ID</b>       |                                        | <b>Position</b>               | P1-D8                       |
| <b>Instrument Name</b> | Agilent G6520 Q-TOF                    | <b>Acq Method</b>             | 20160322_MS_ESIH_POS_1min.m |
| <b>Acquired Time</b>   | 5/17/2021 19:56:15                     | <b>IRM Calibration Status</b> | Success                     |
| <b>DA Method</b>       | small molecular data analysis method.m | <b>Comment</b>                | ESIH by zhuzhenyun          |

### User Spectra

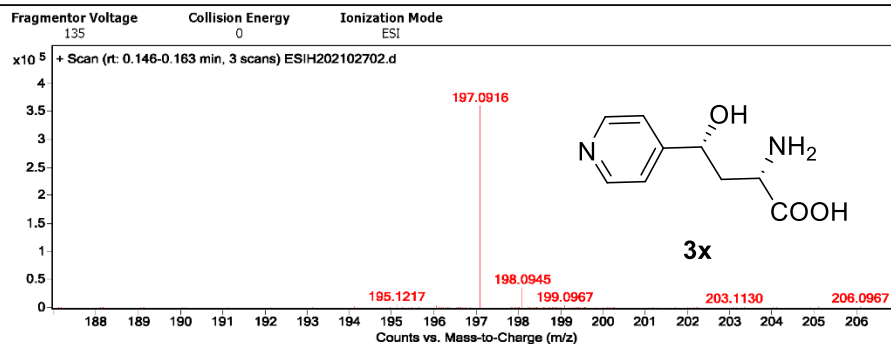

### Formula Calculator Results

| m/z      | Calc m/z | Diff (mDa) | Diff (ppm) | Ion Formula                                                  | Ion                |
|----------|----------|------------|------------|--------------------------------------------------------------|--------------------|
| 197.0916 | 197.0921 | 0.5        | 2.53       | C <sub>9</sub> H <sub>13</sub> N <sub>2</sub> O <sub>3</sub> | (M+H) <sup>+</sup> |

--- End Of Report ---

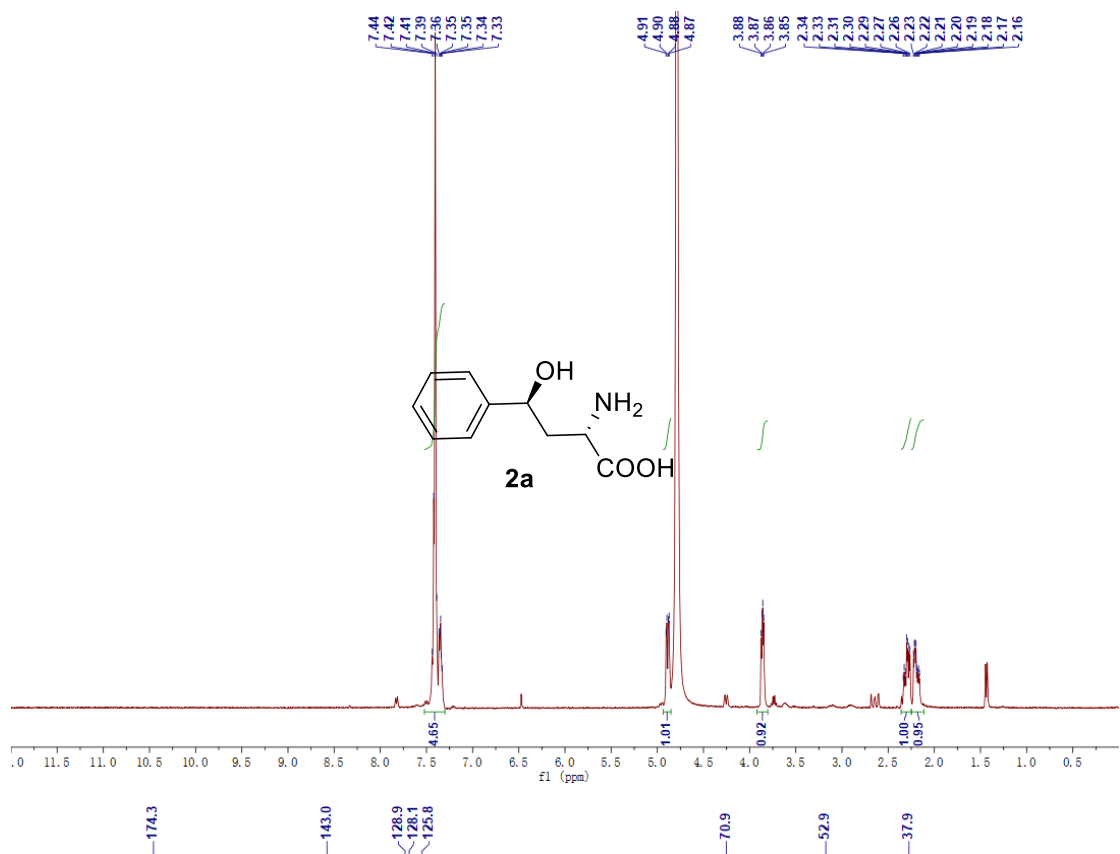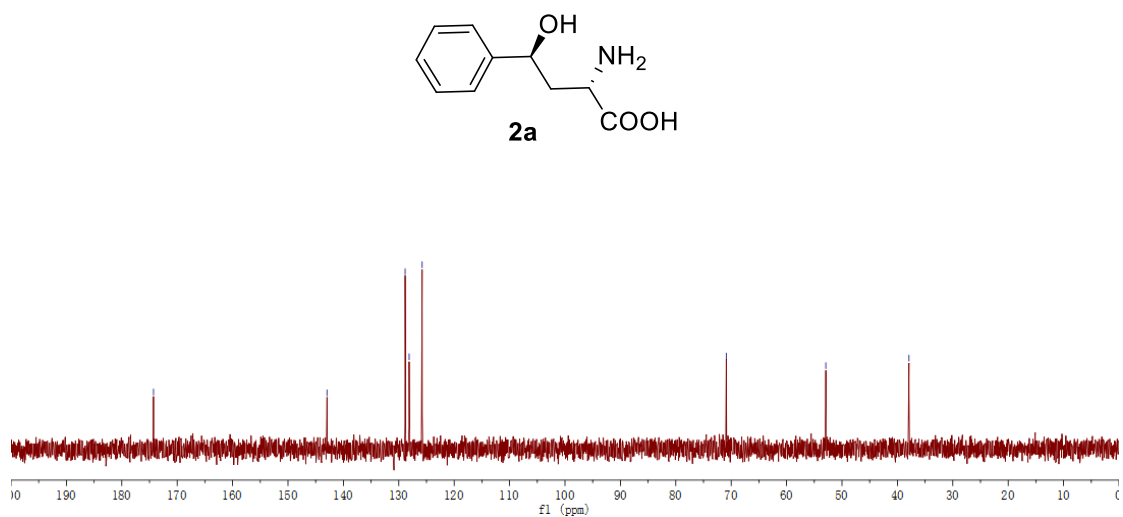

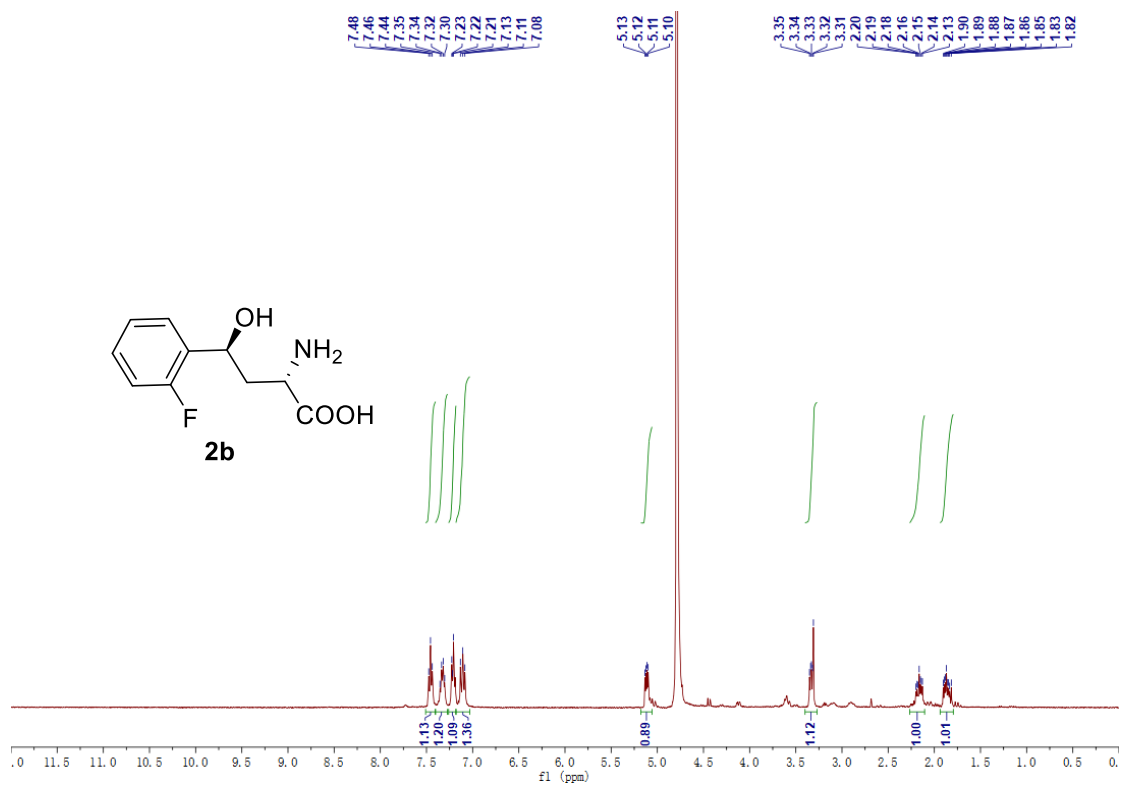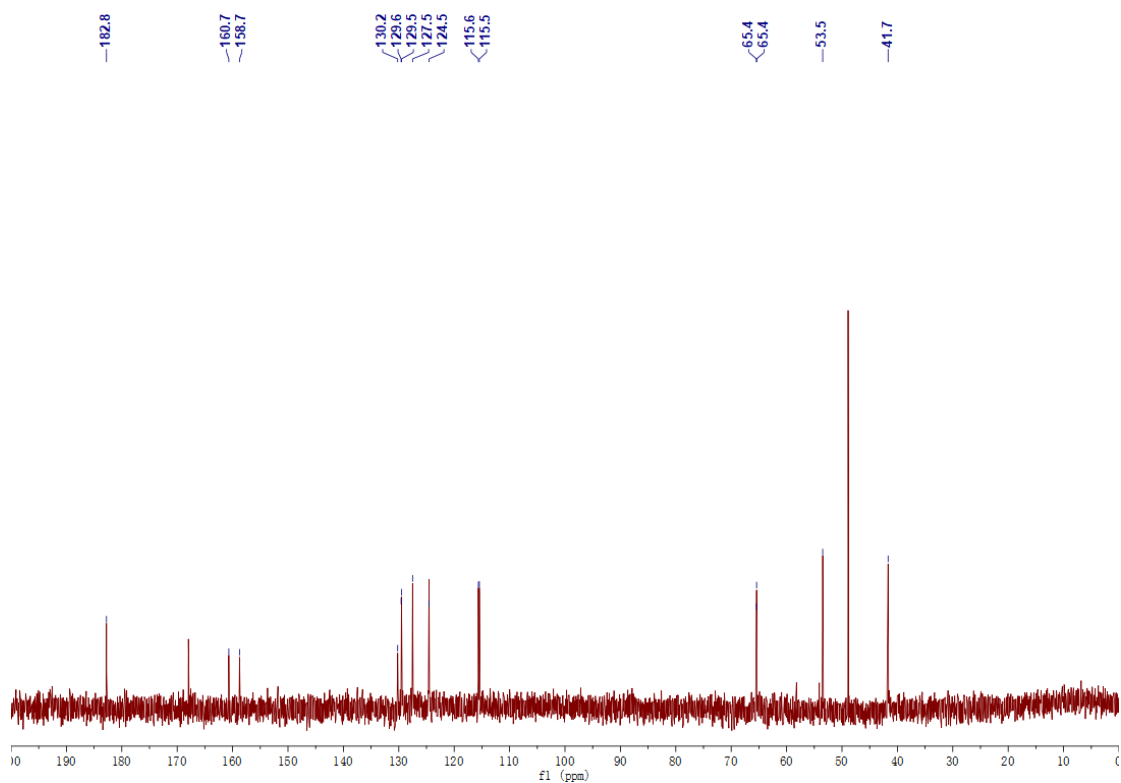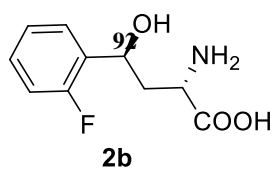



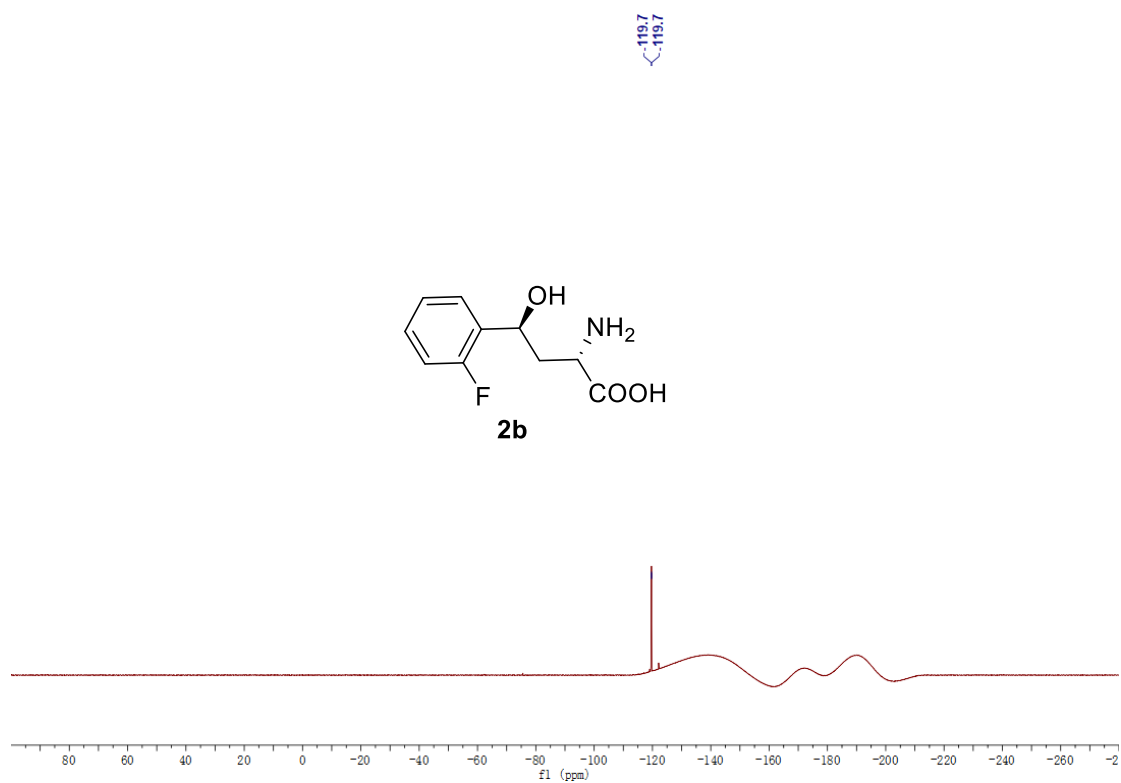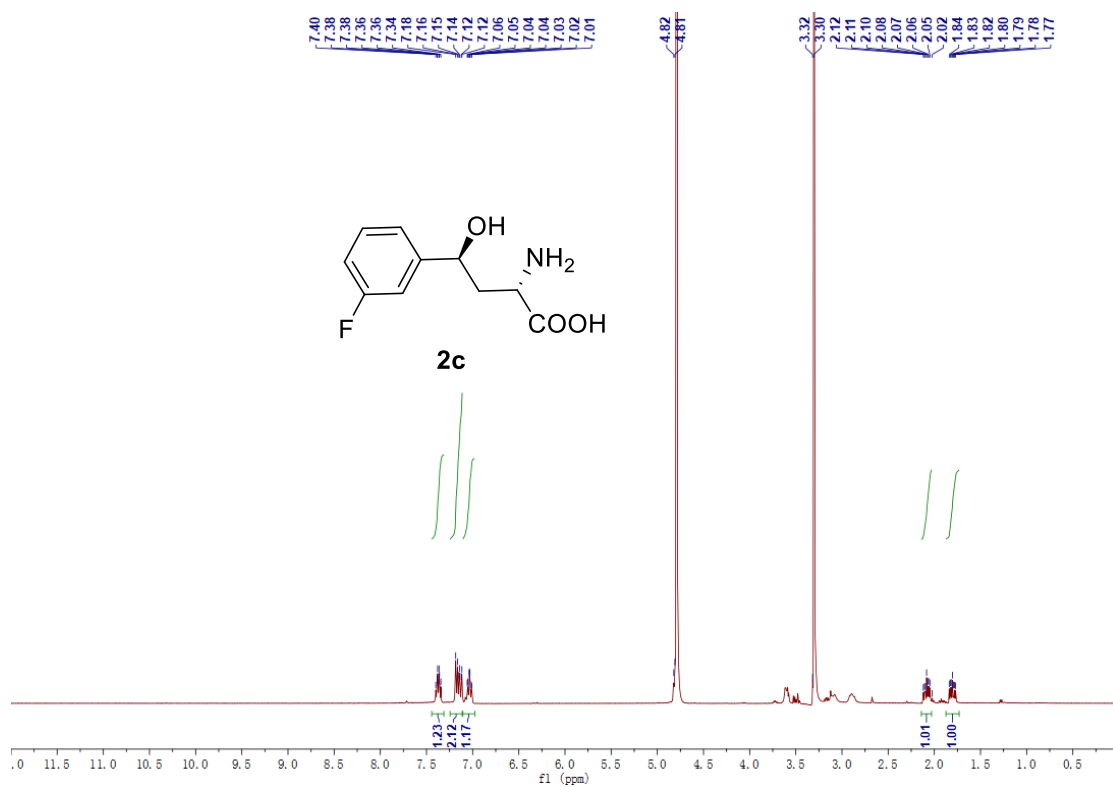

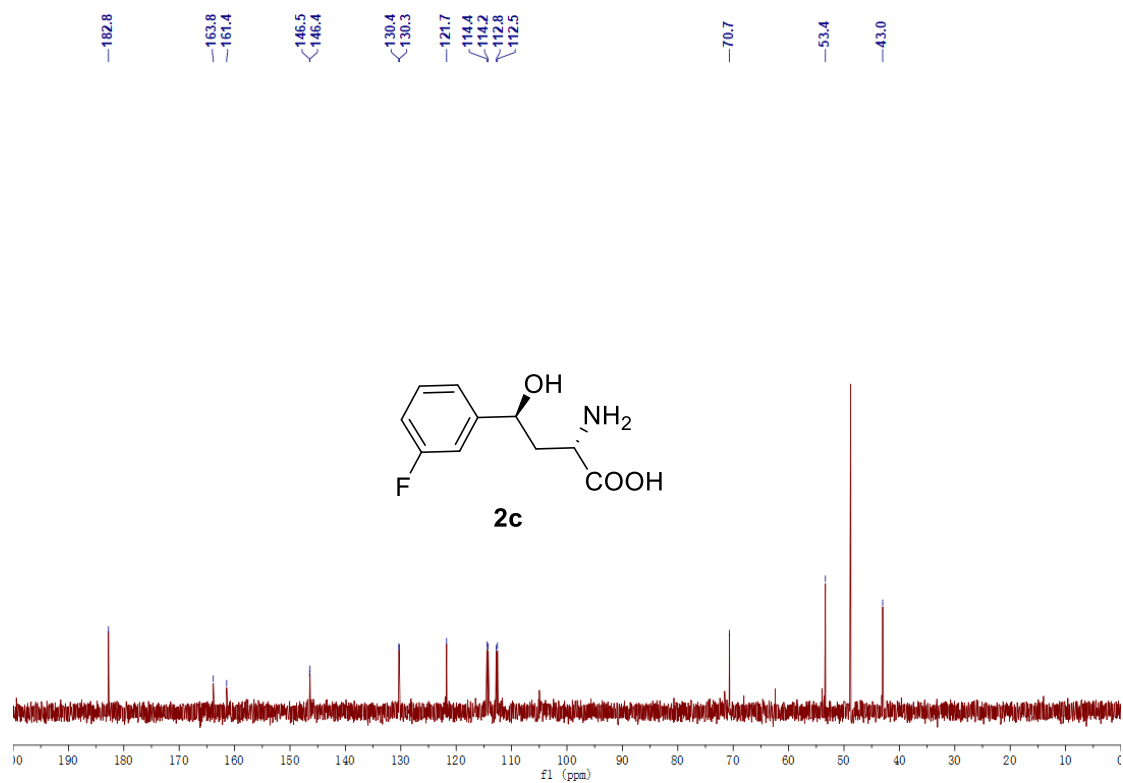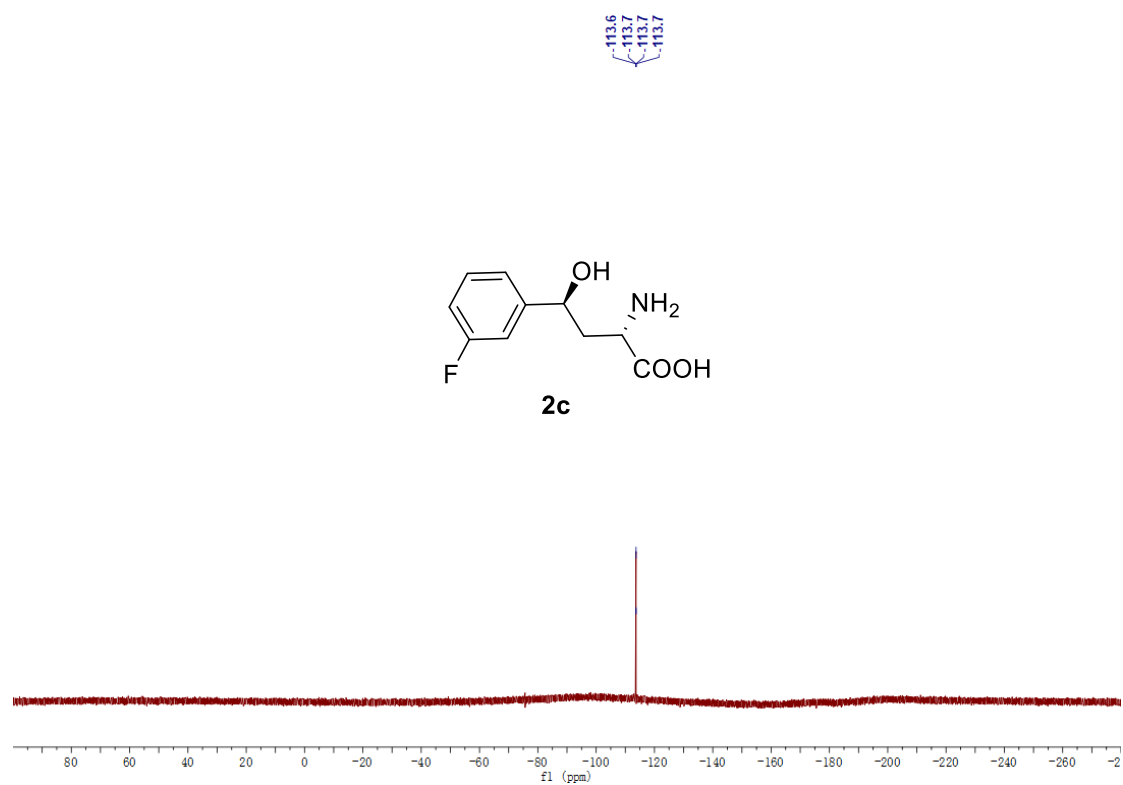

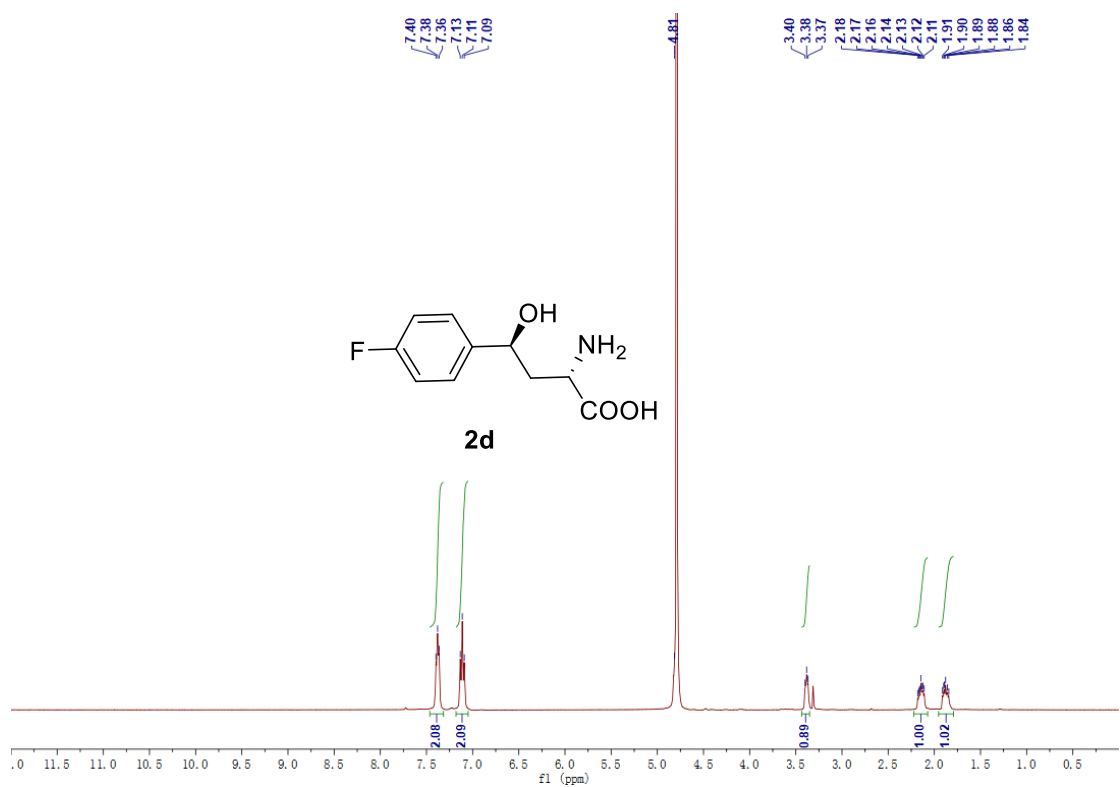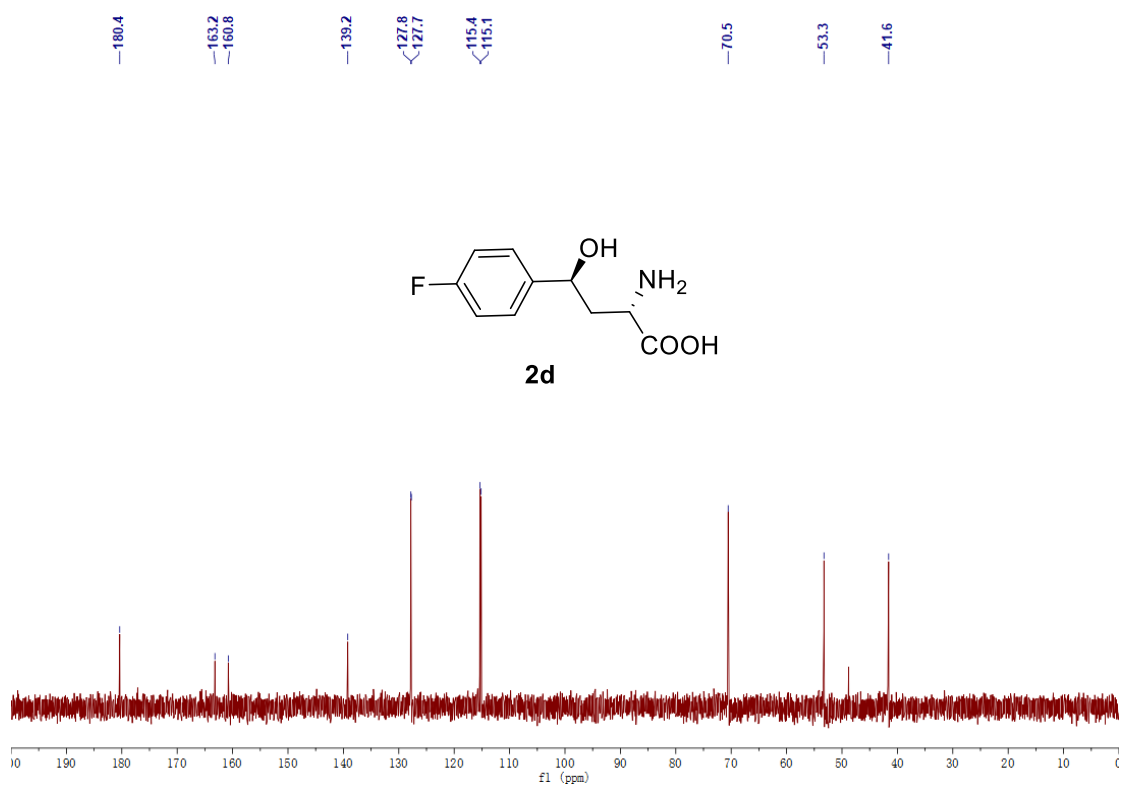

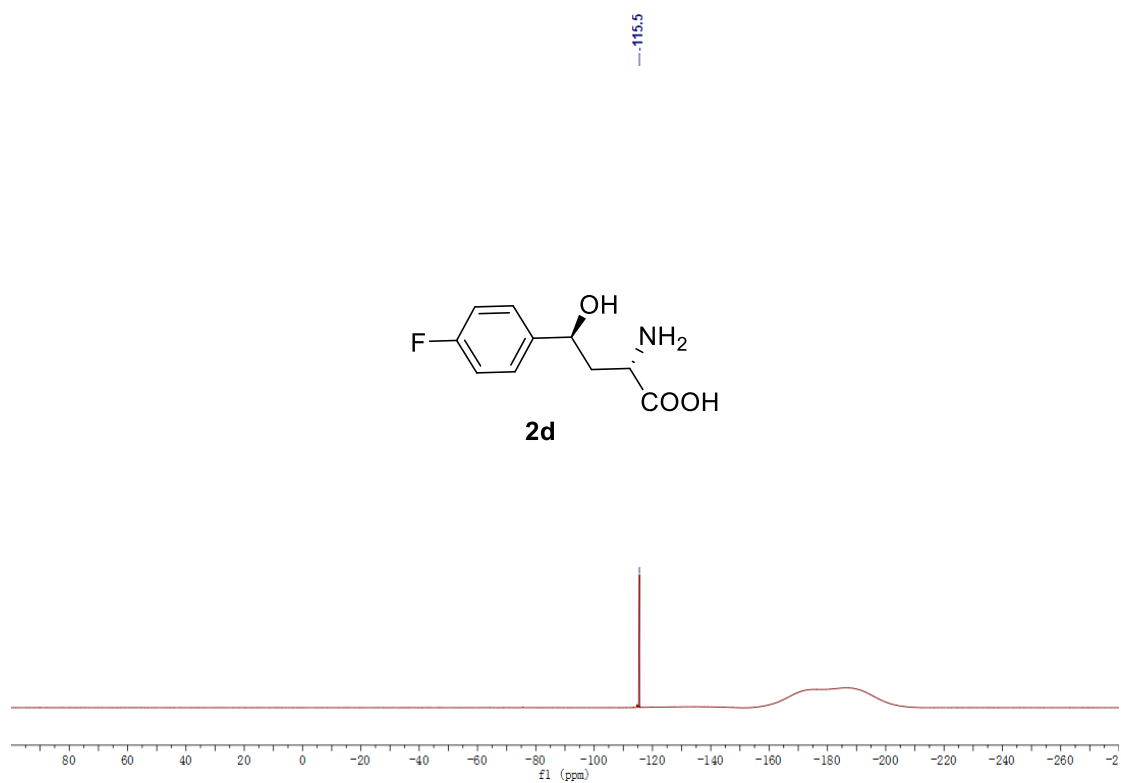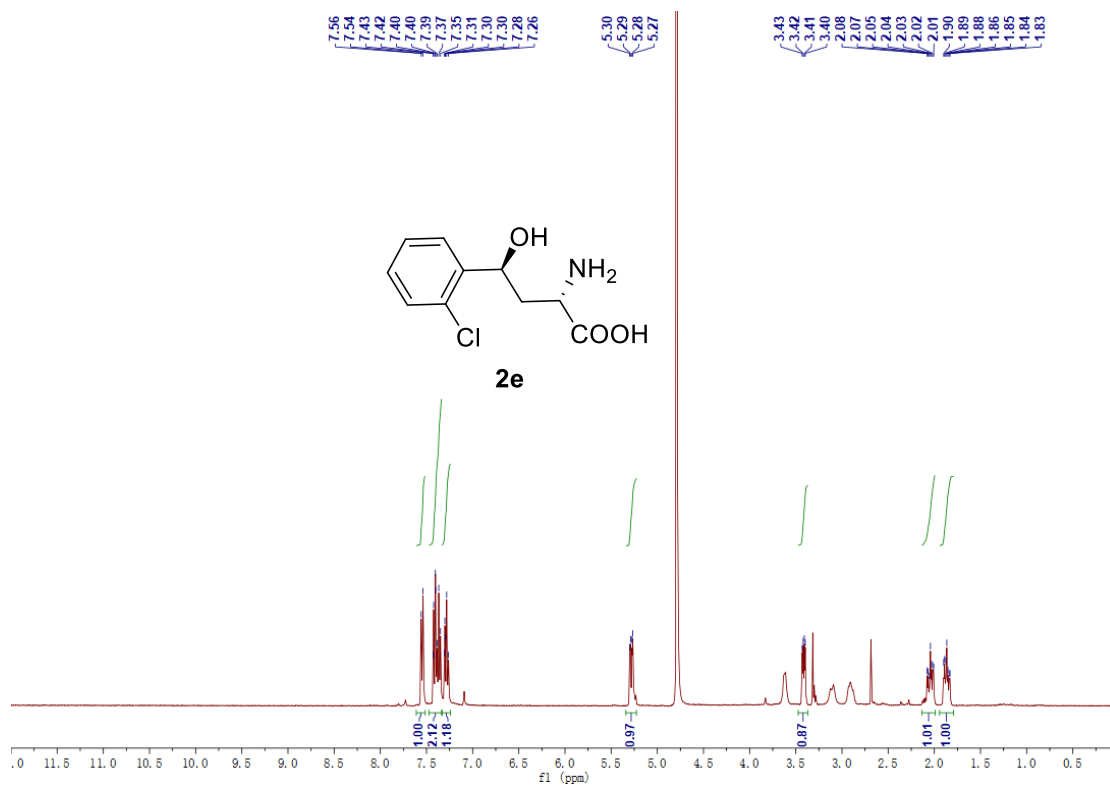

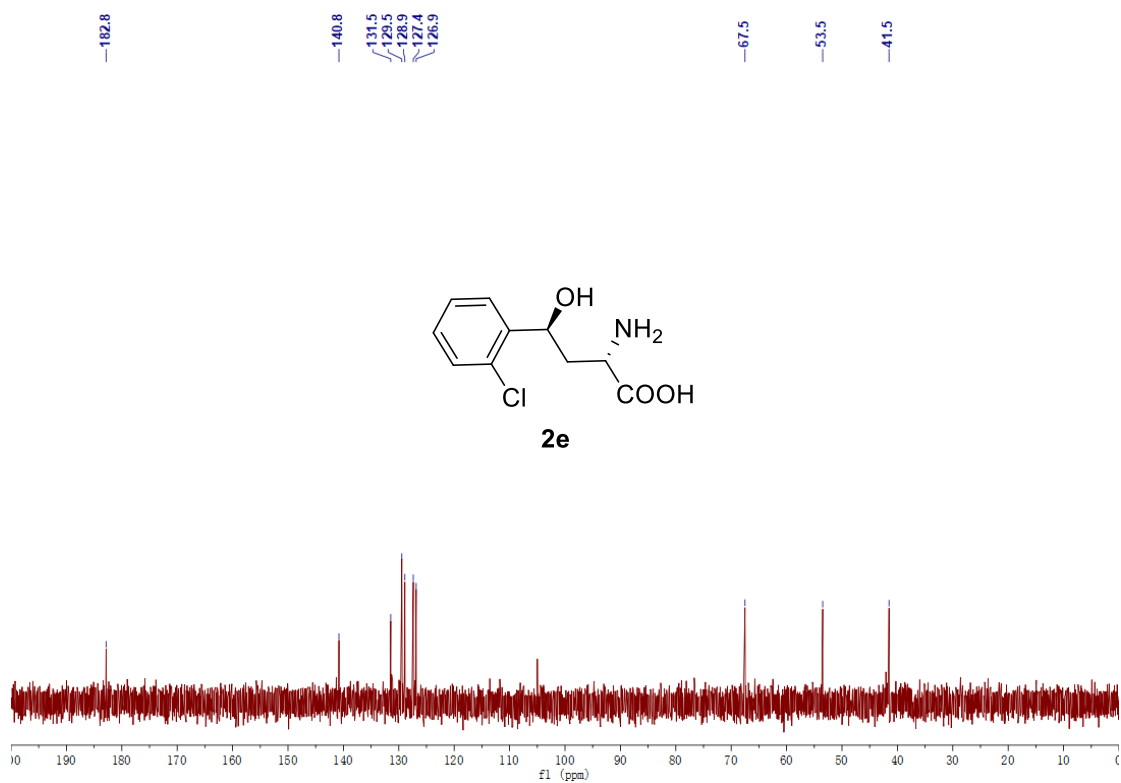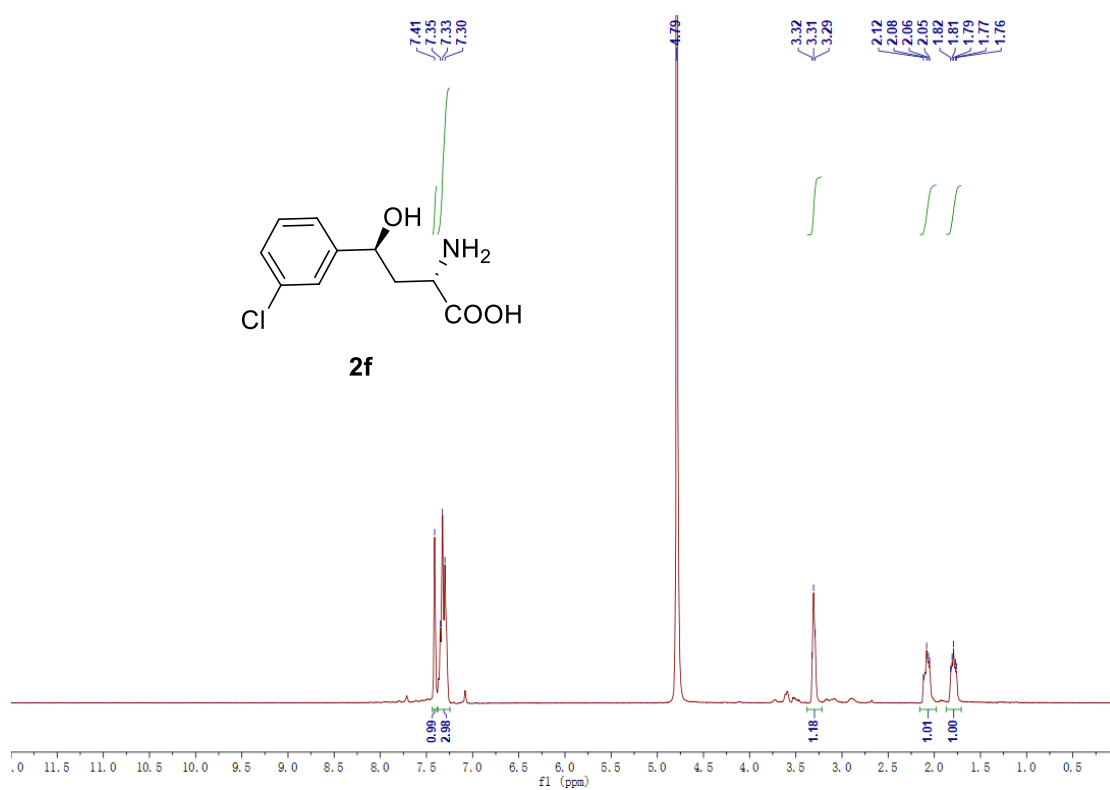

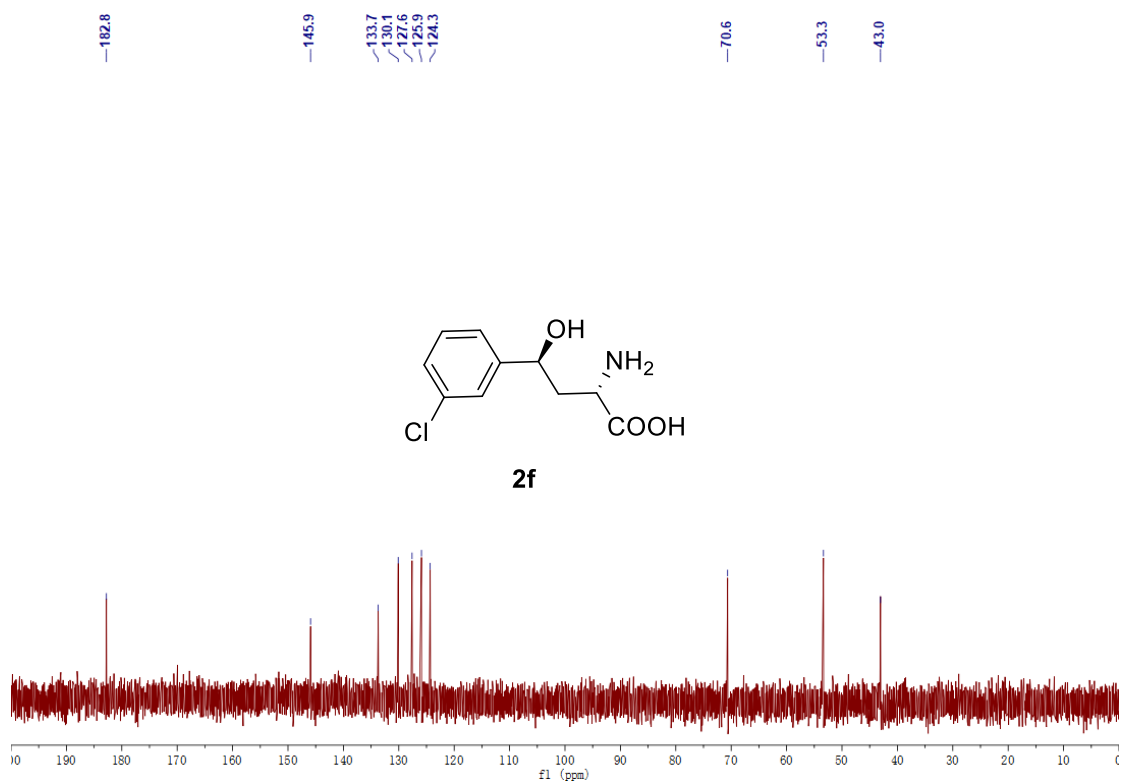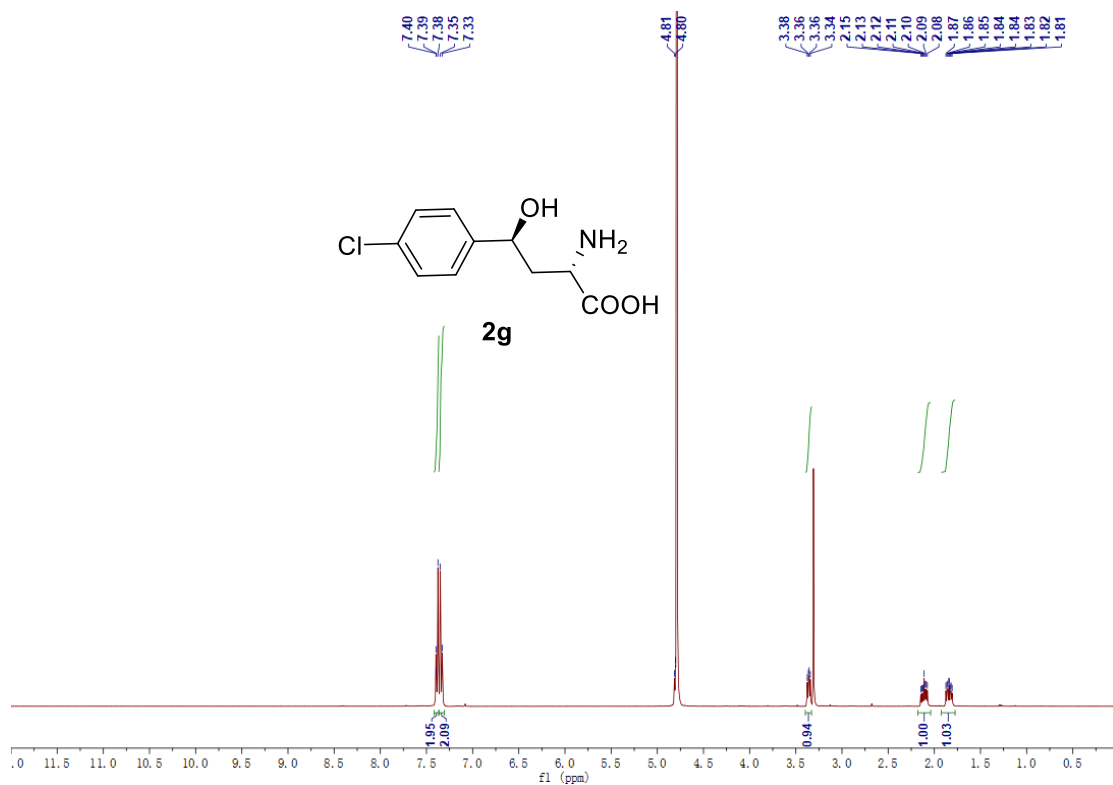

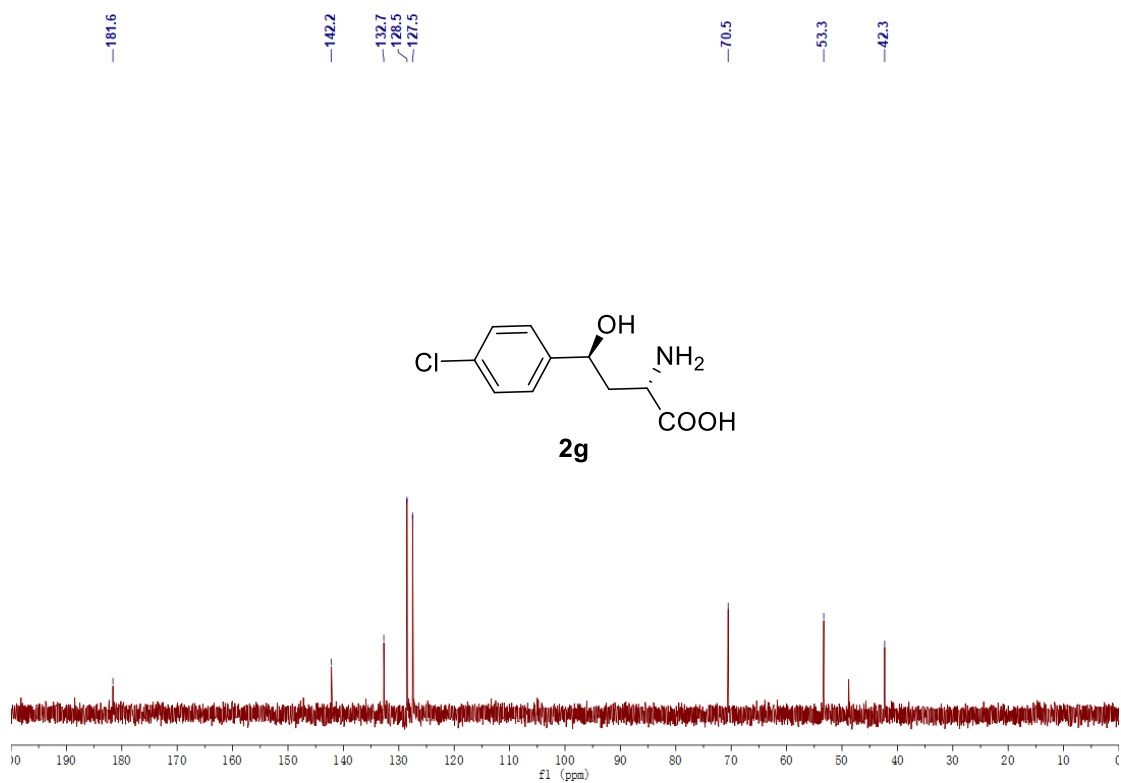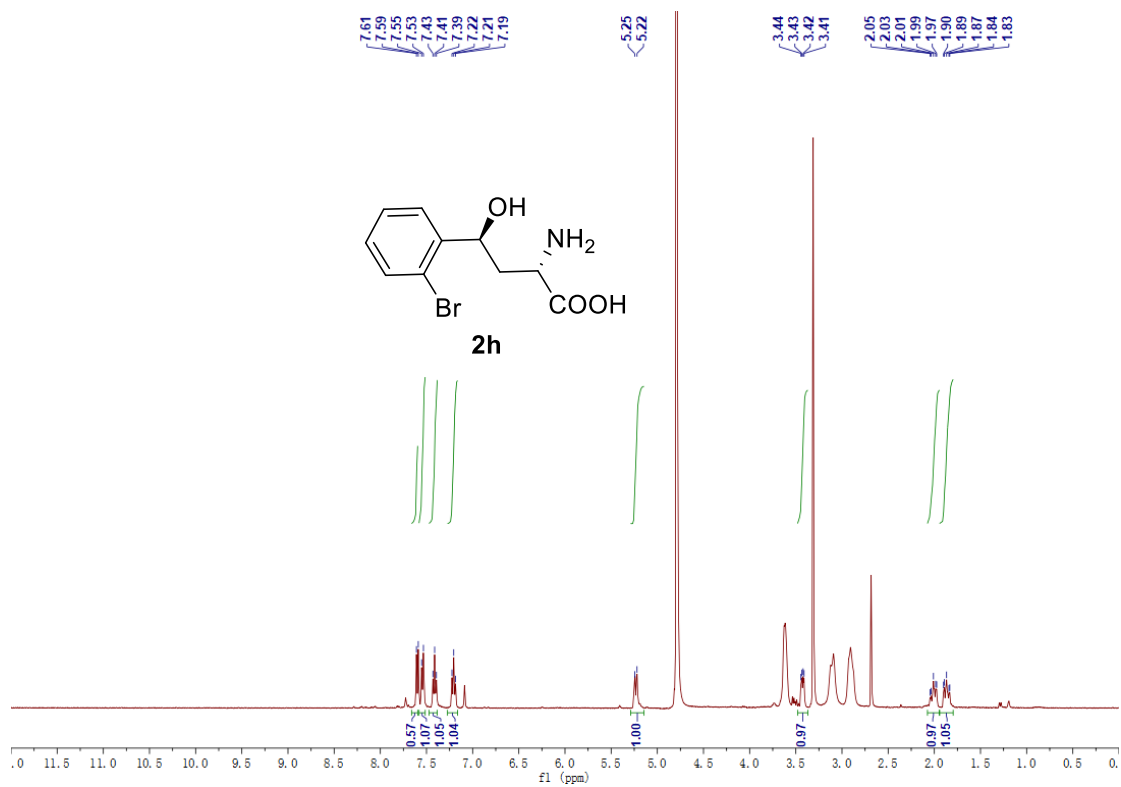

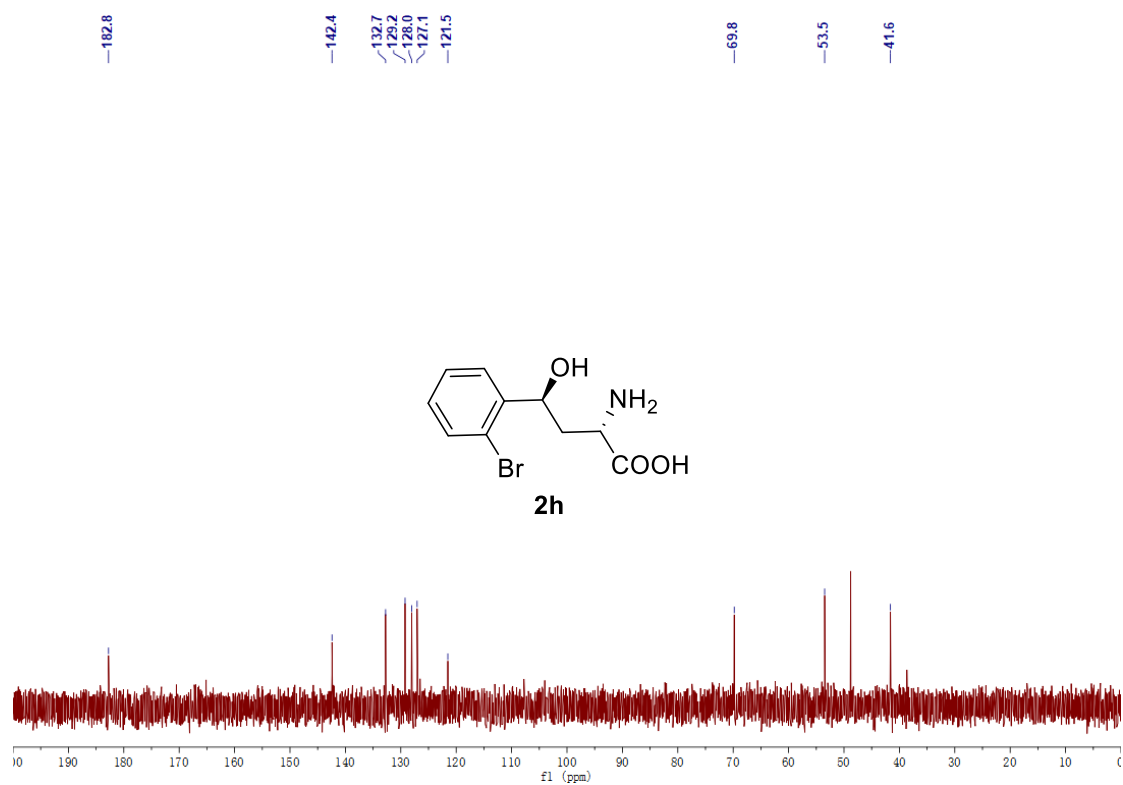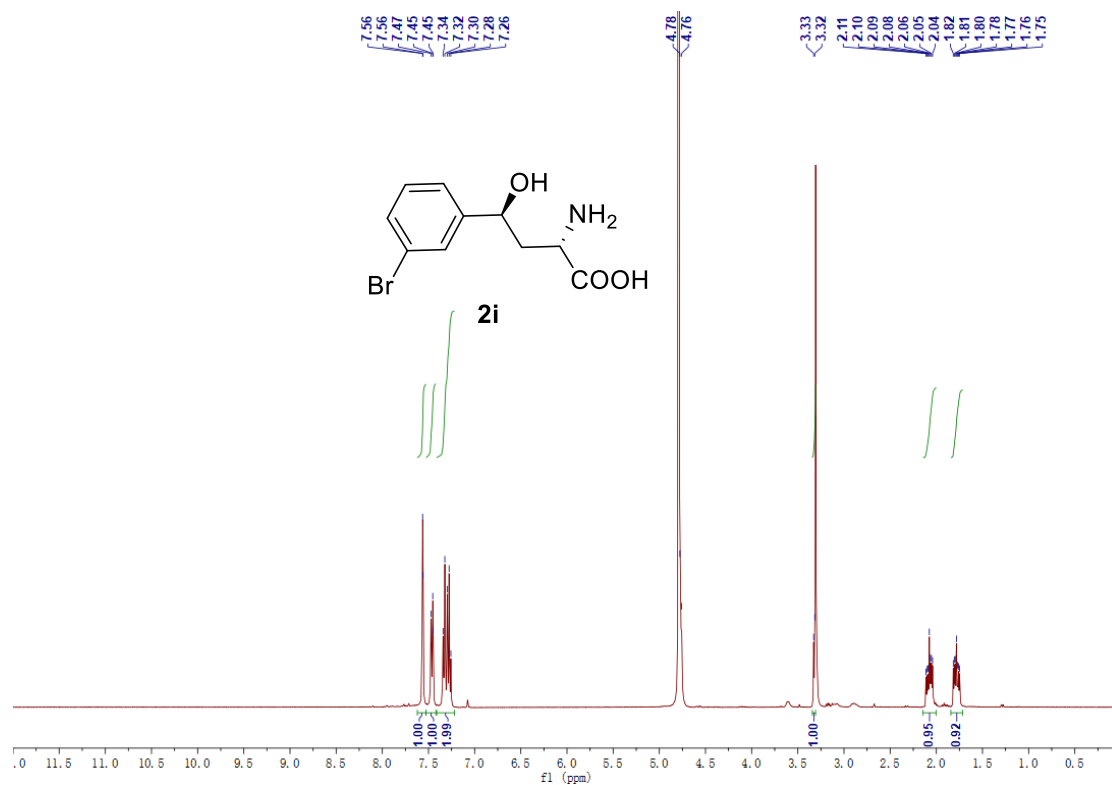



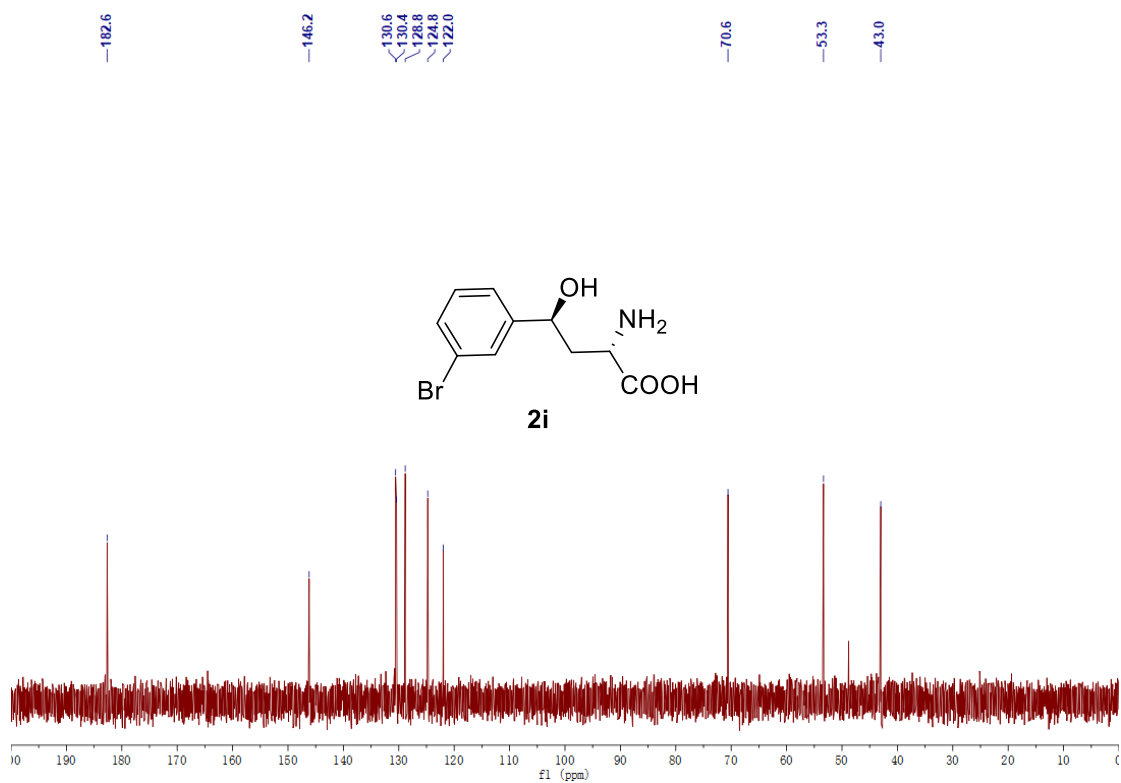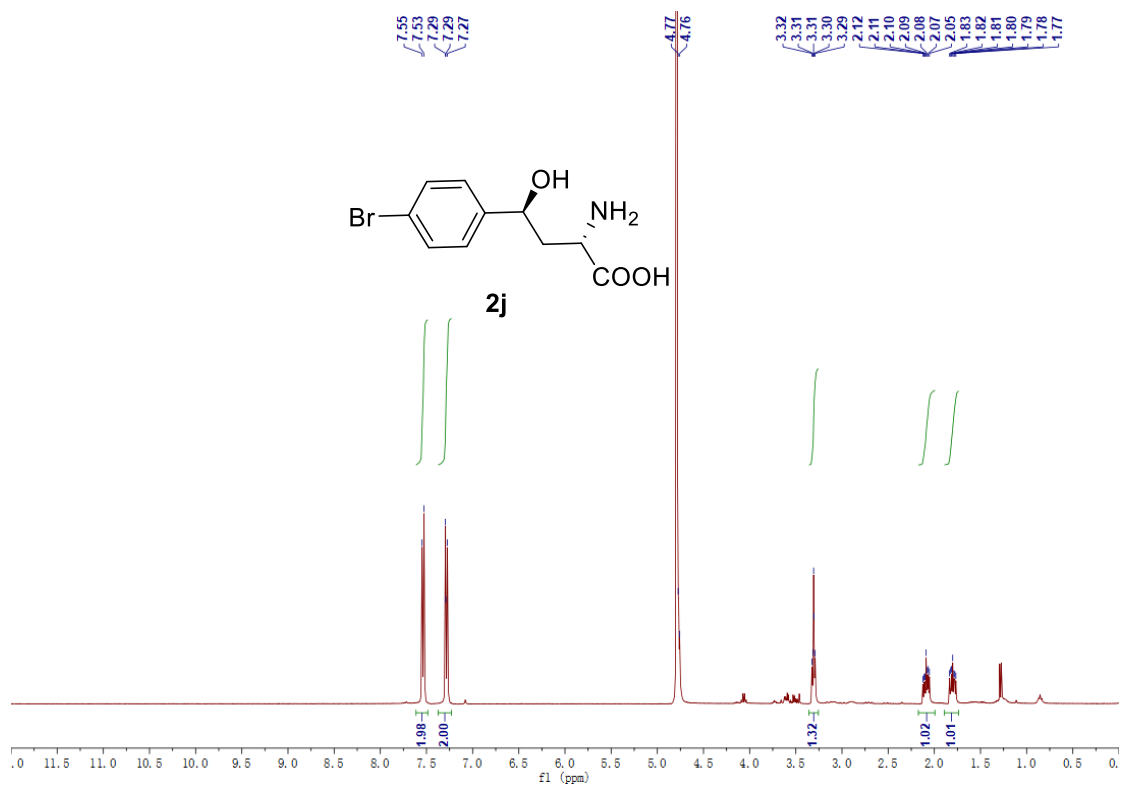

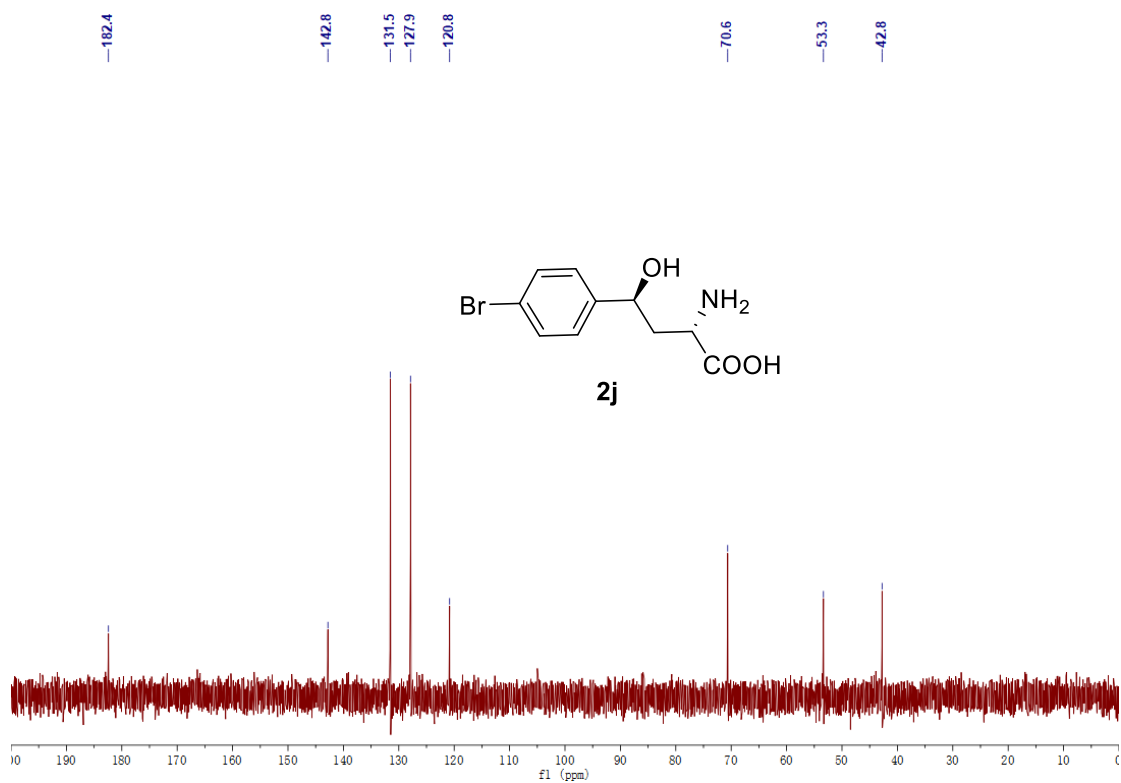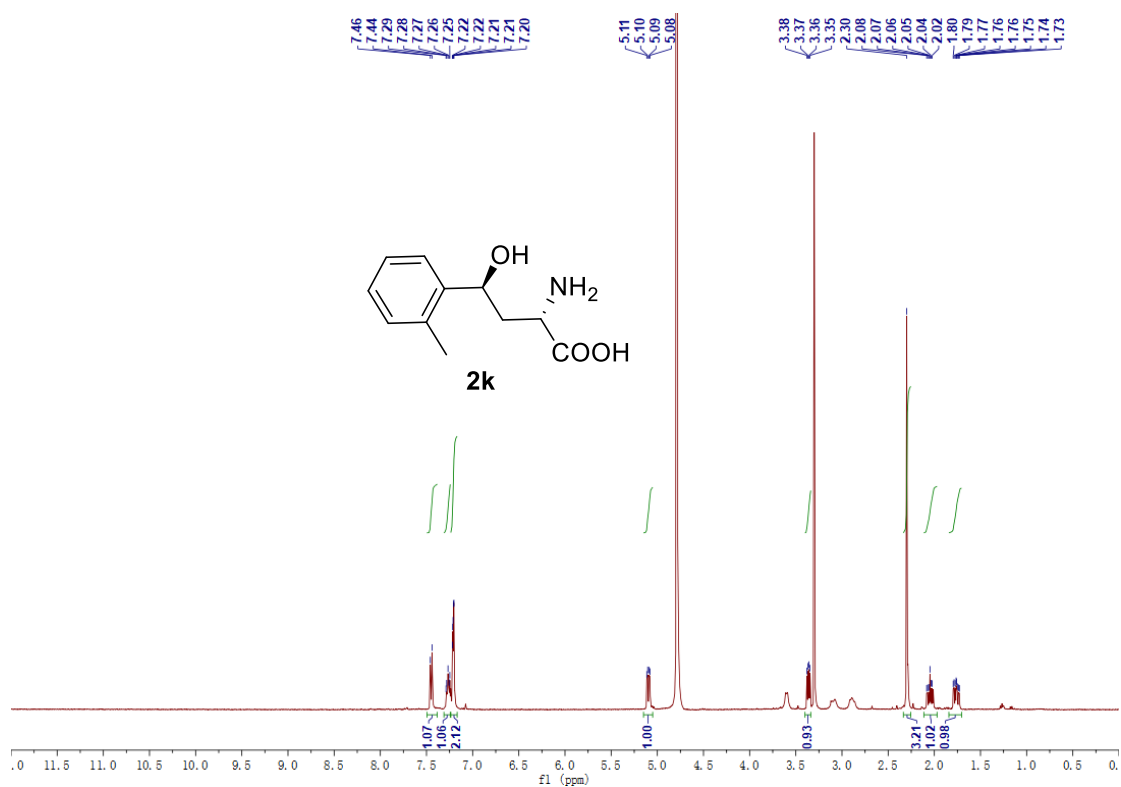

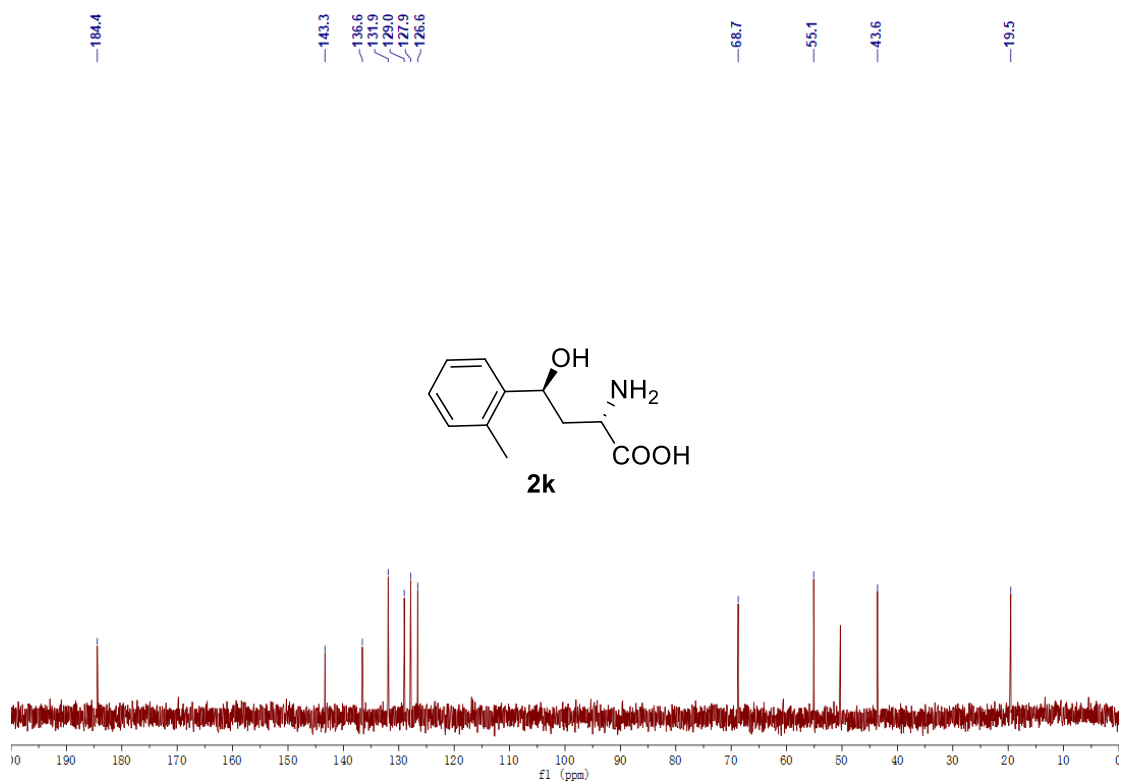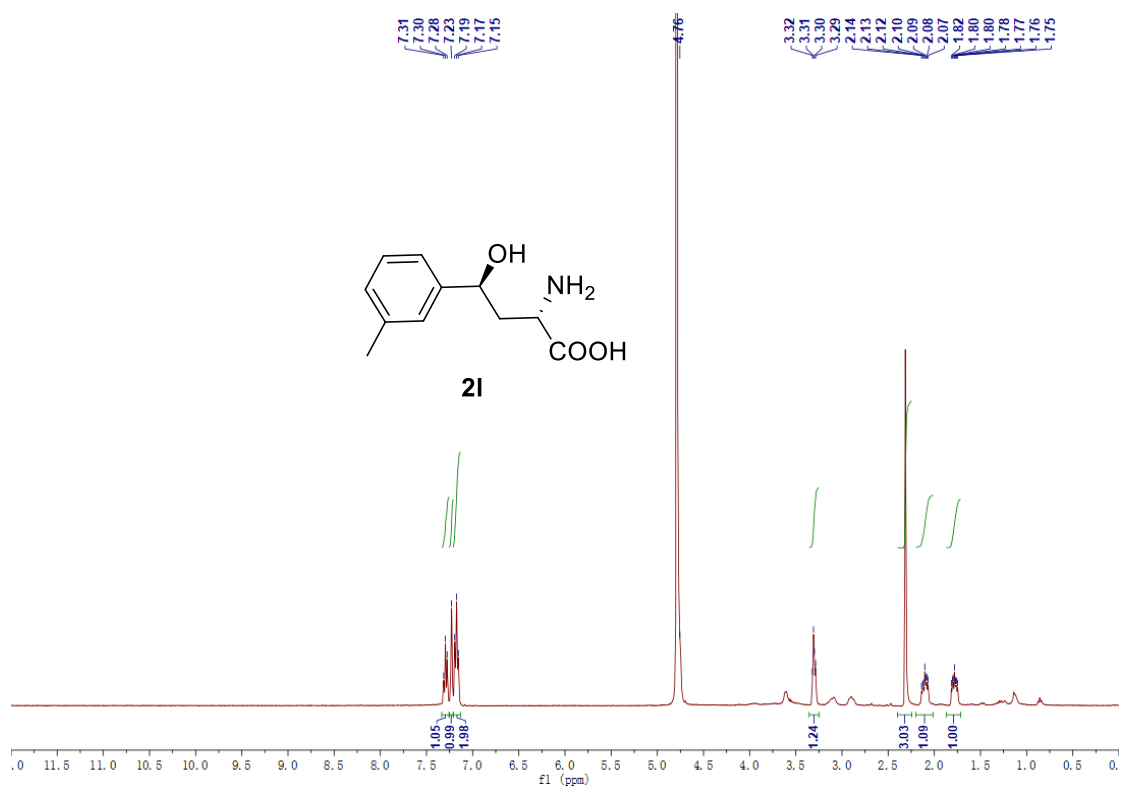

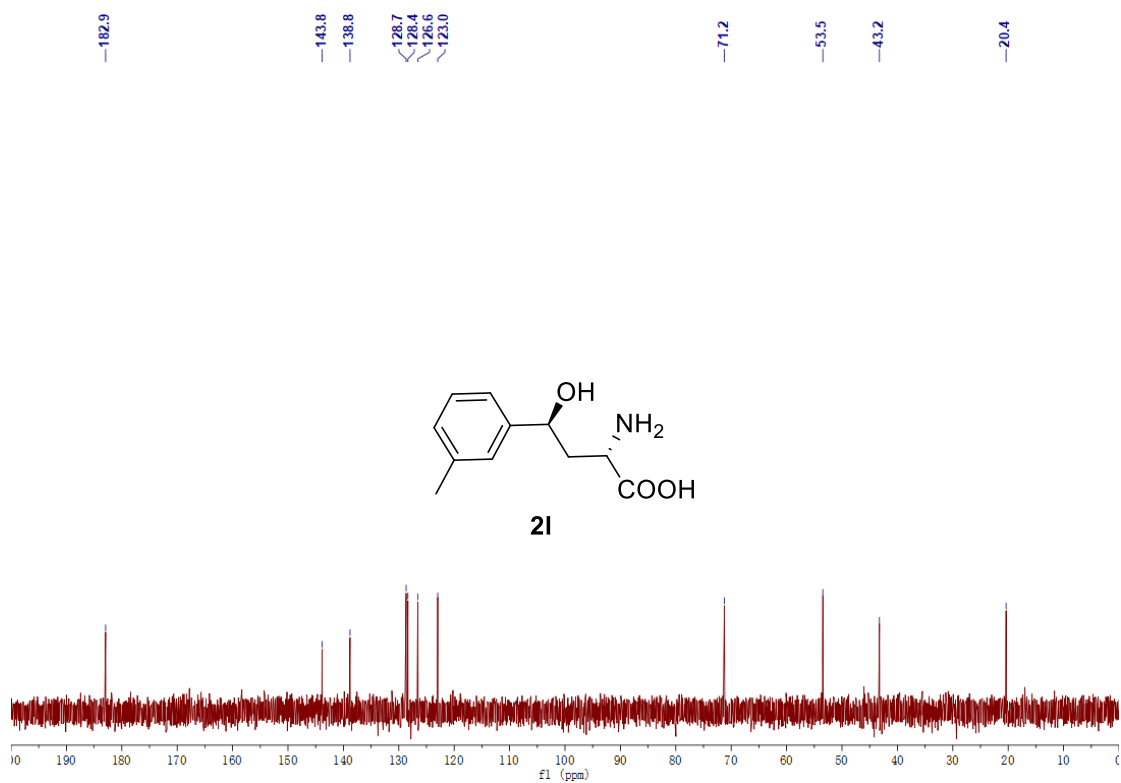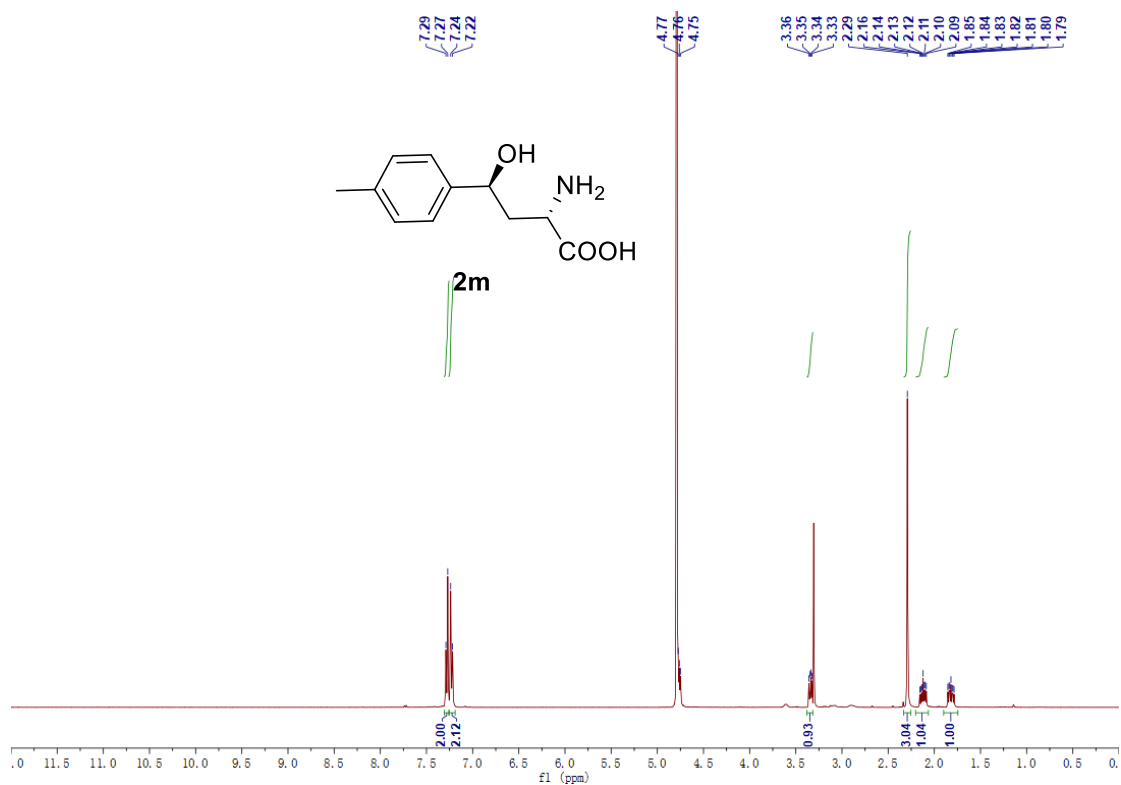

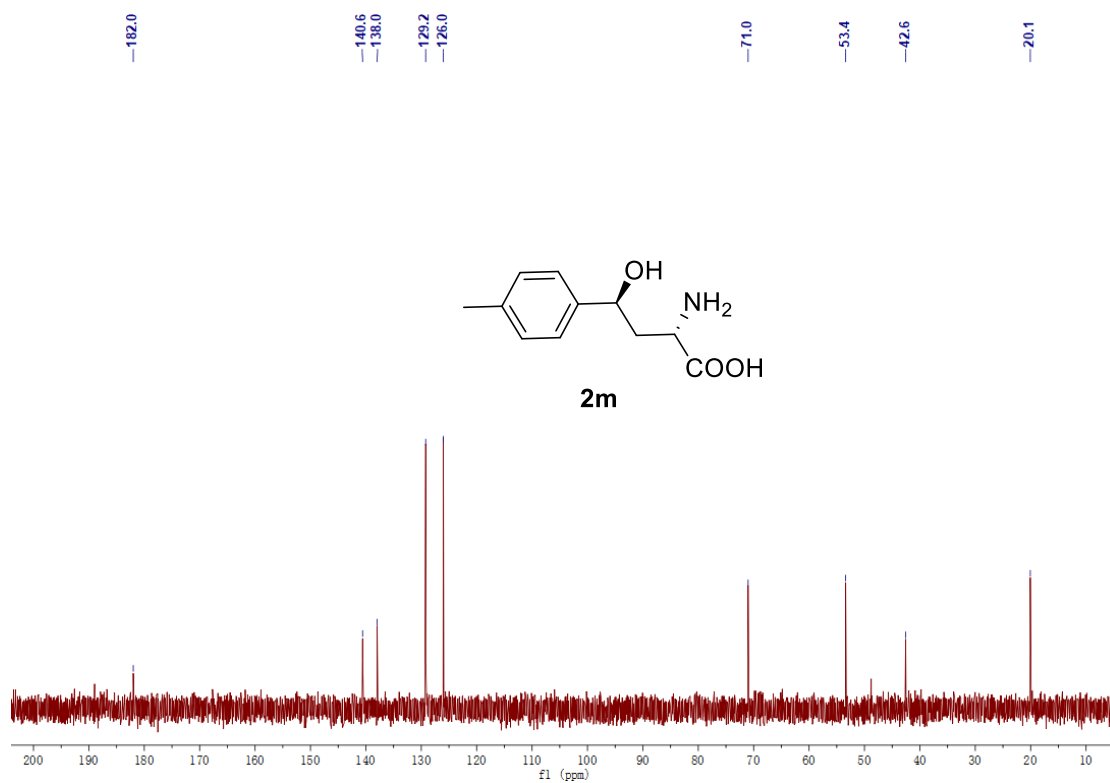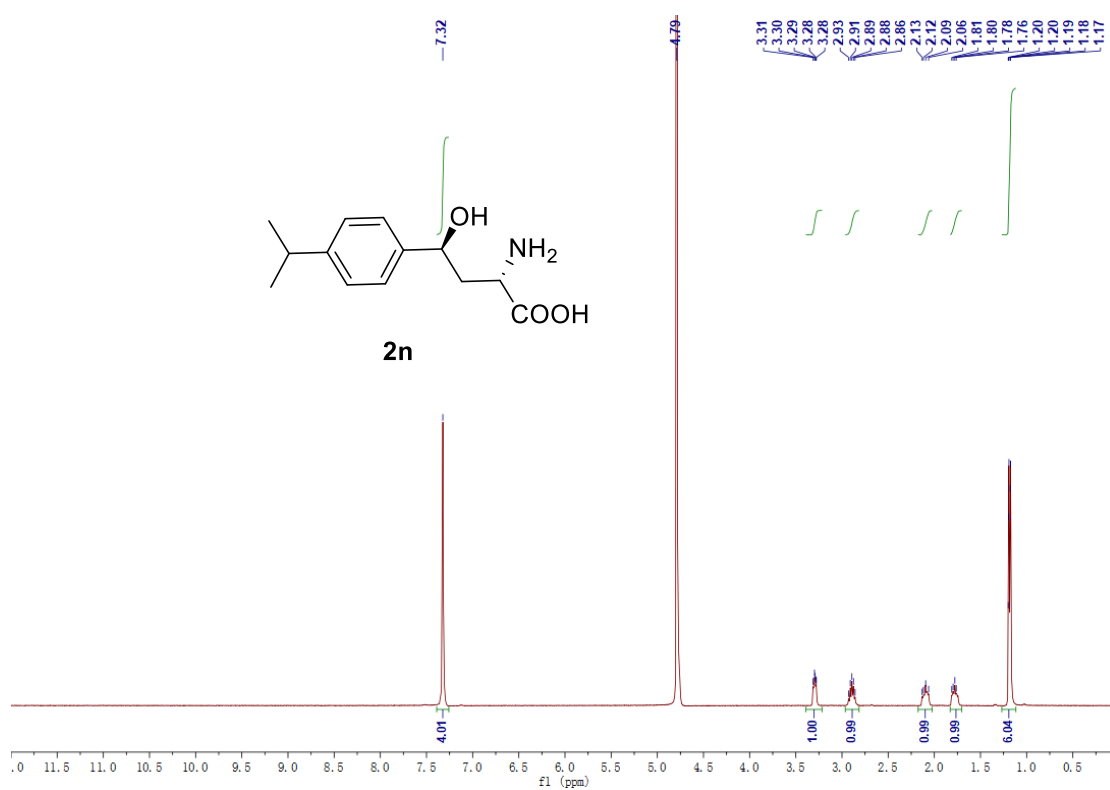

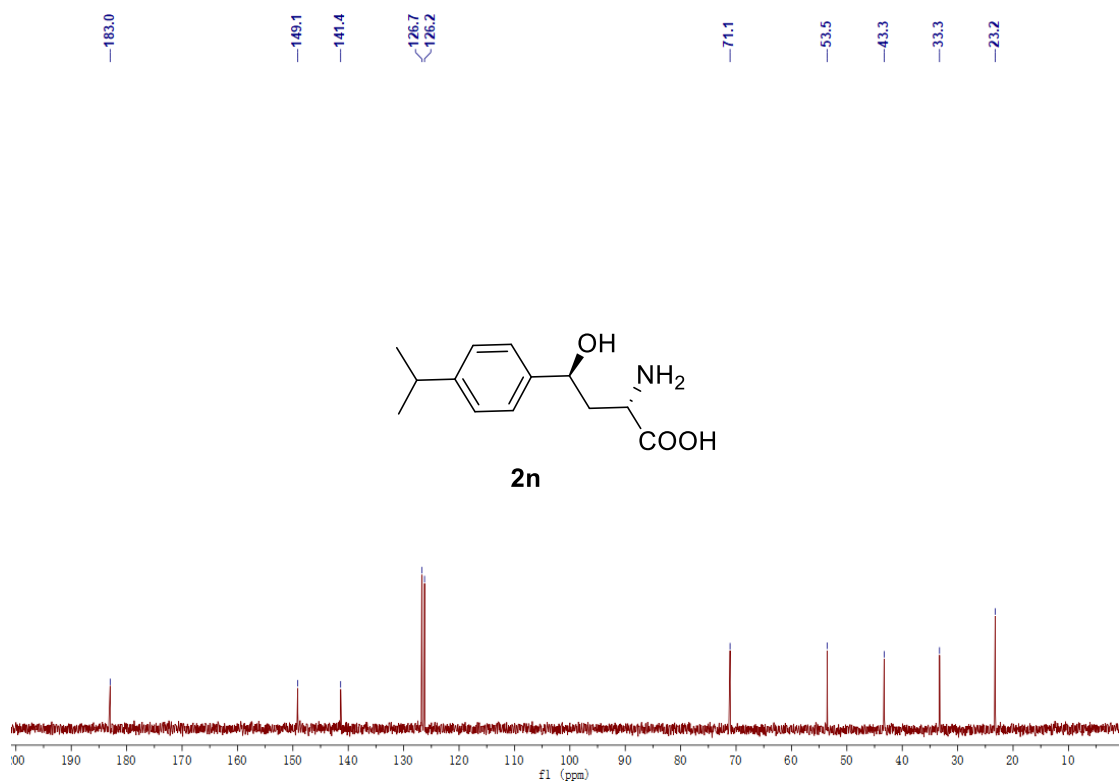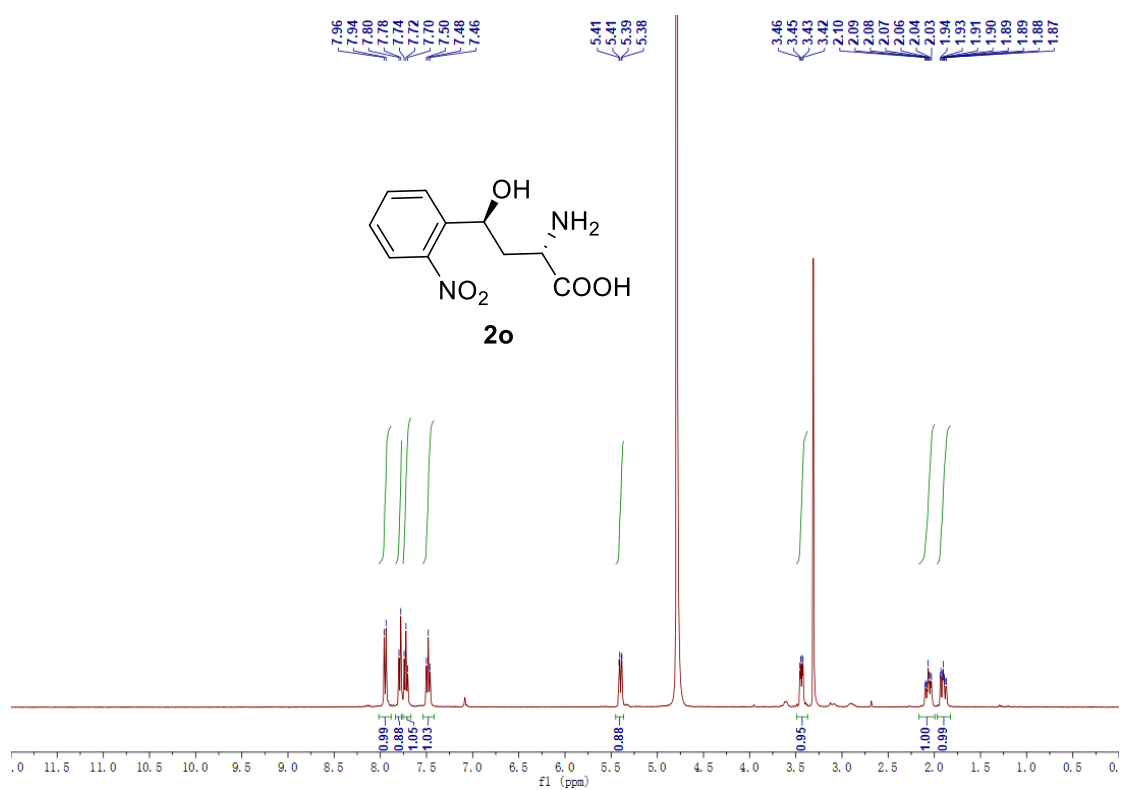

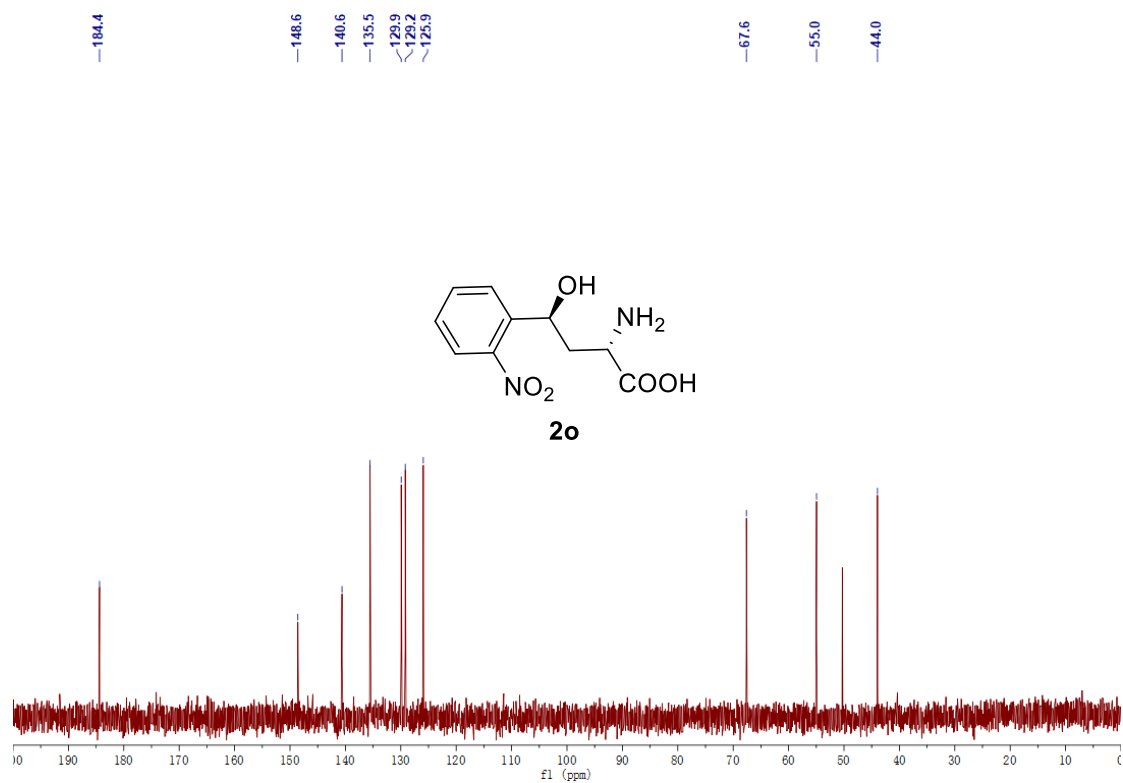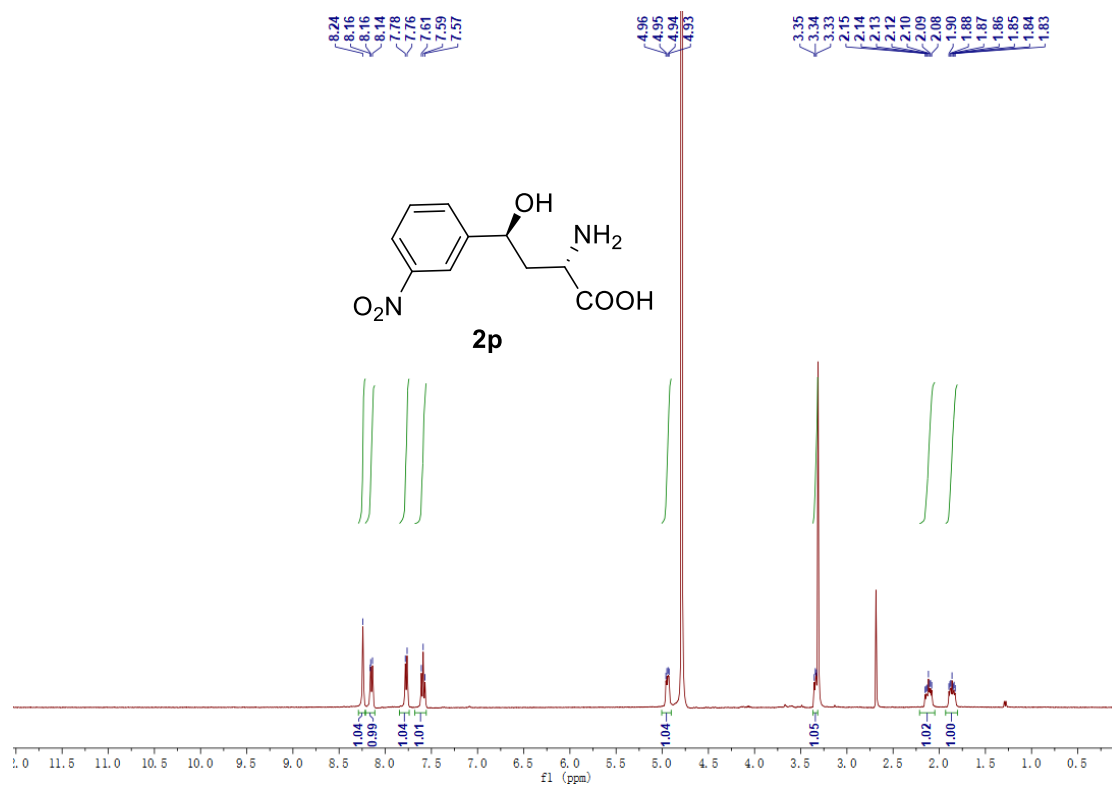

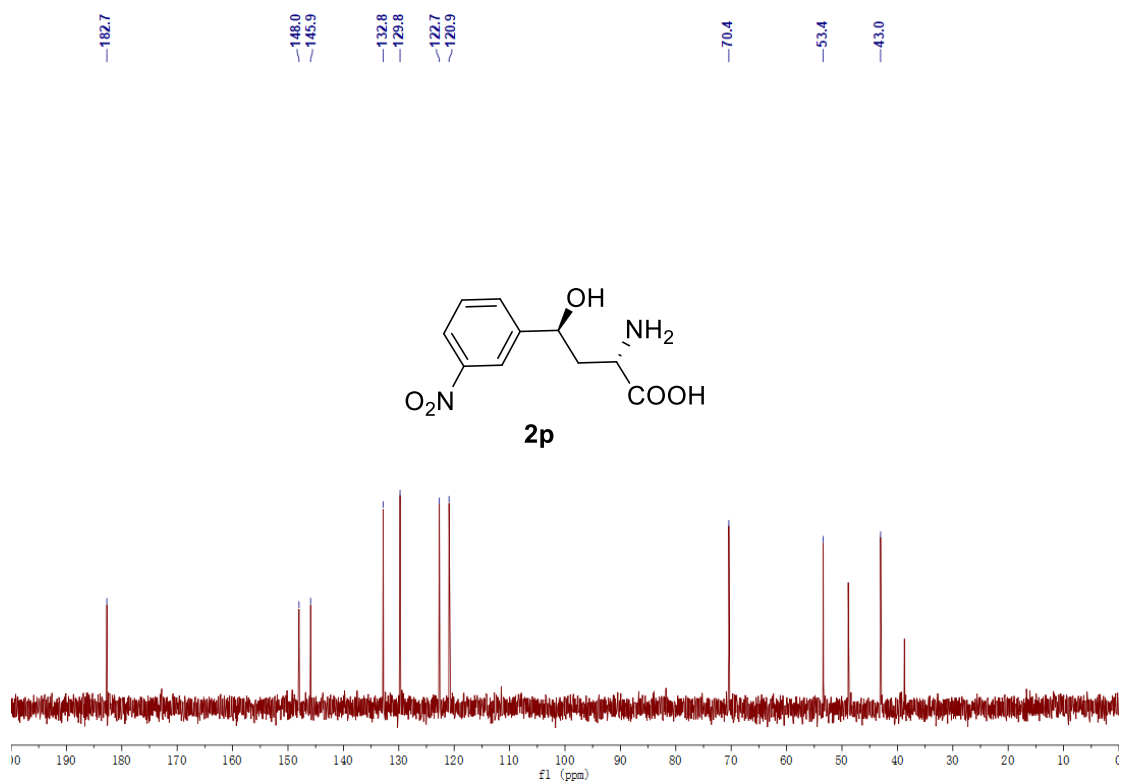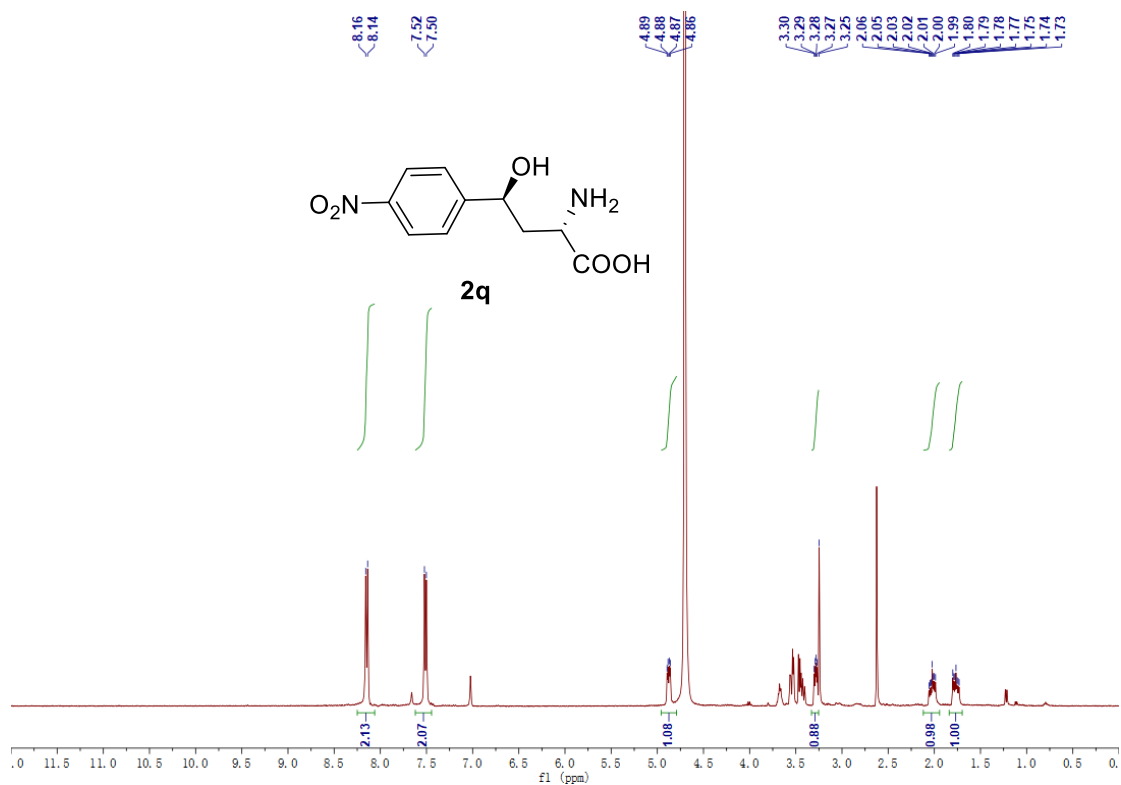



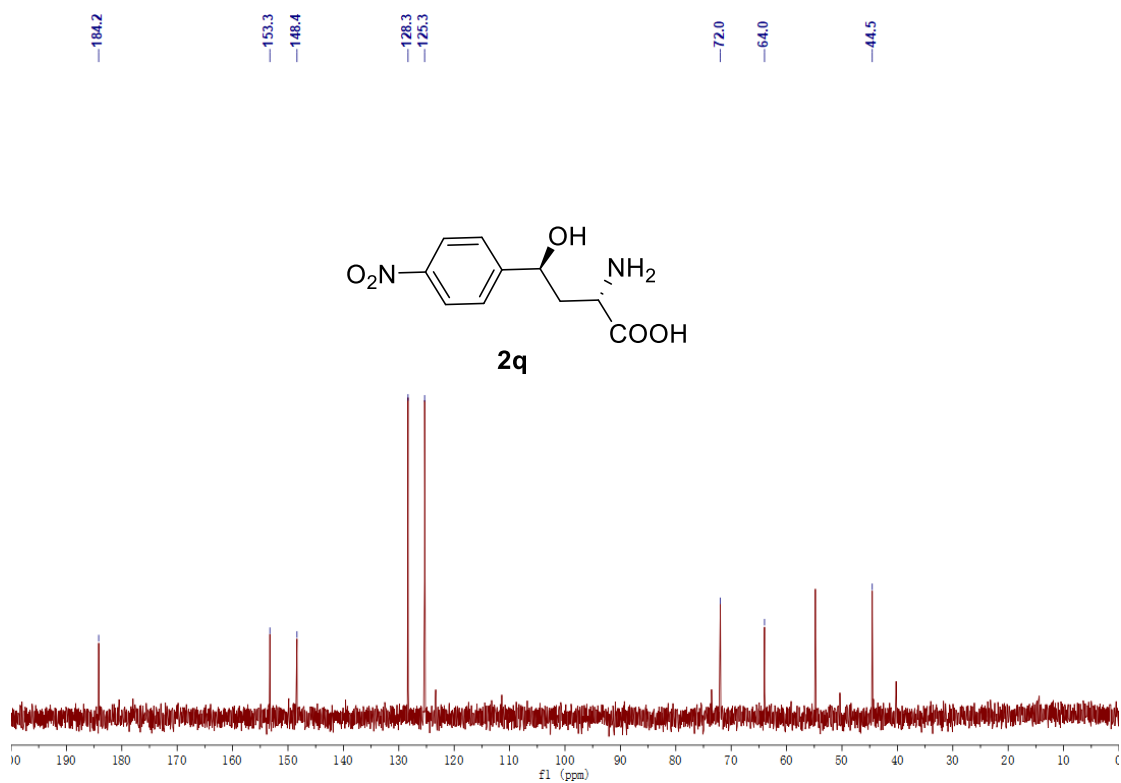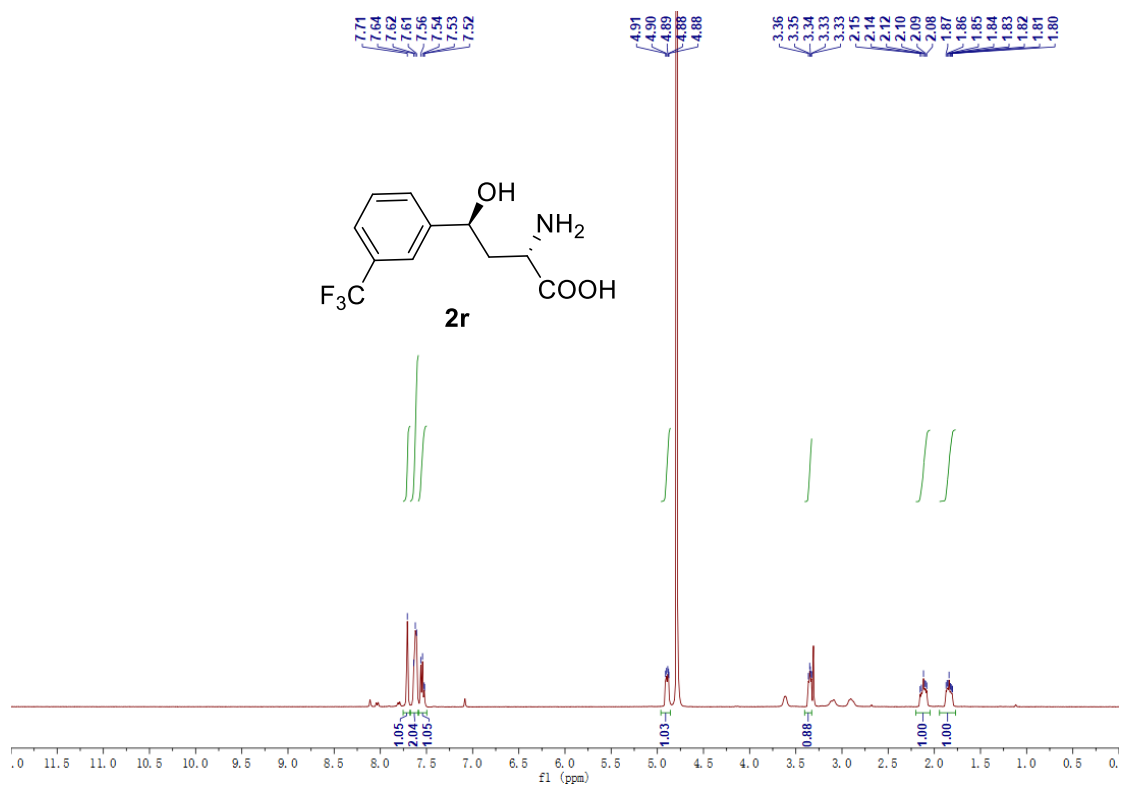

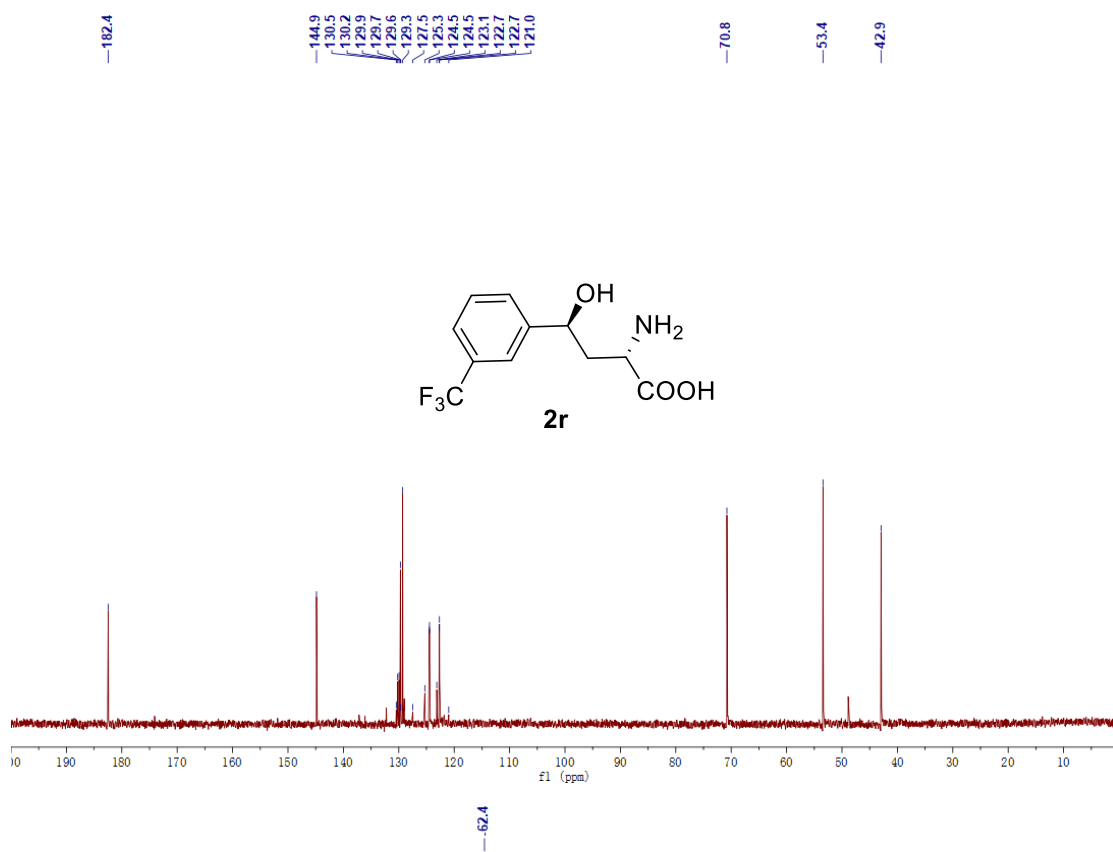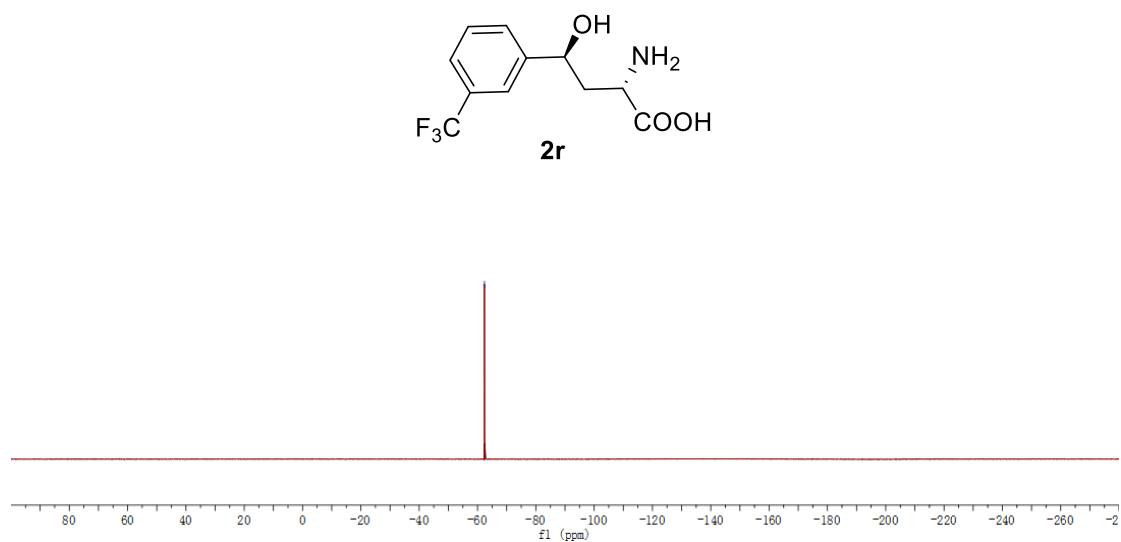

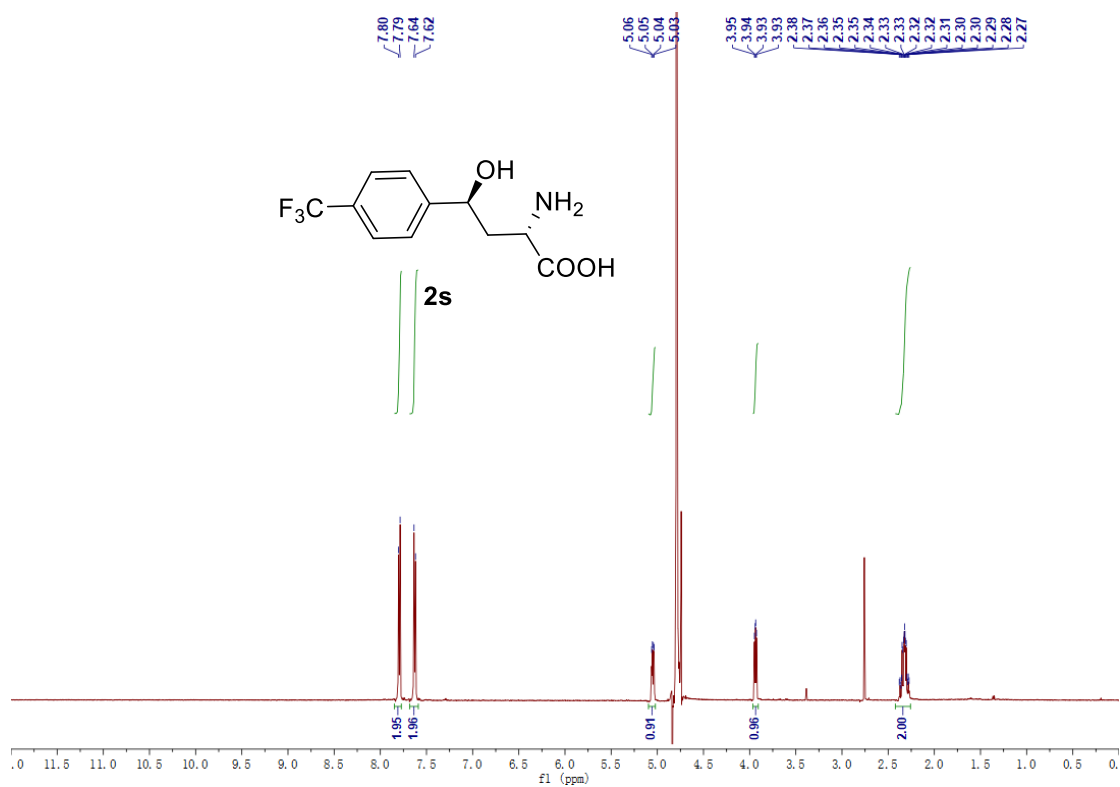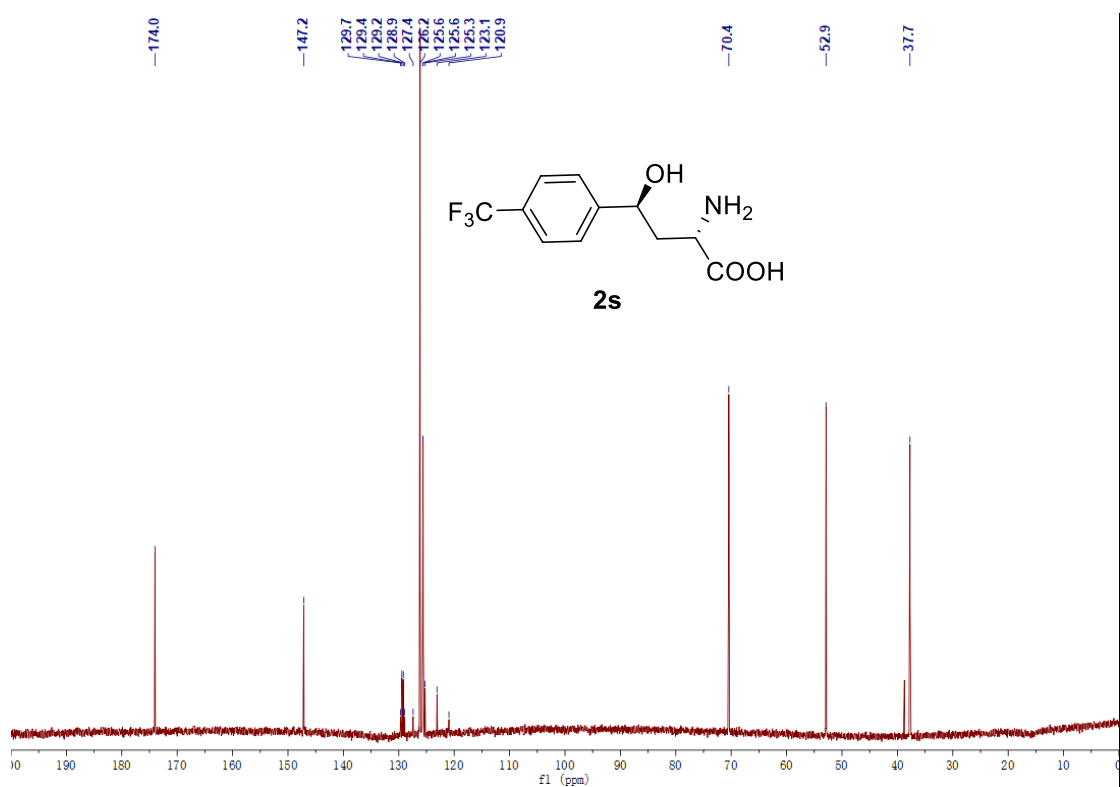

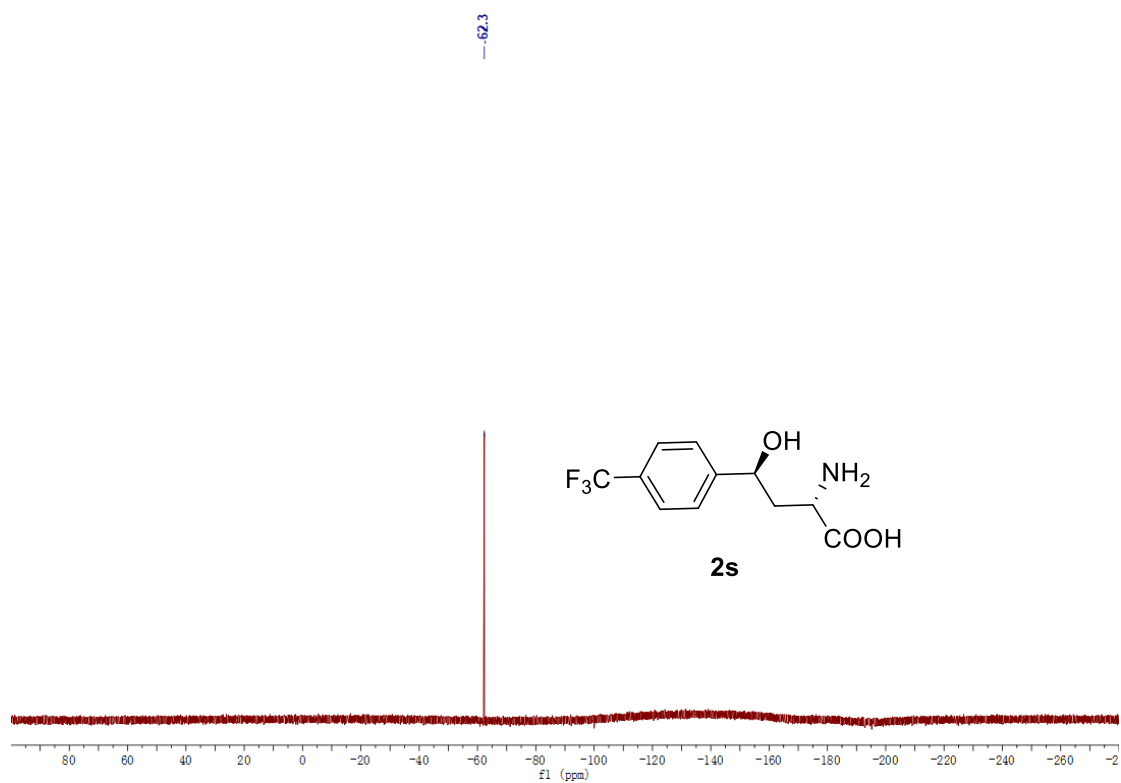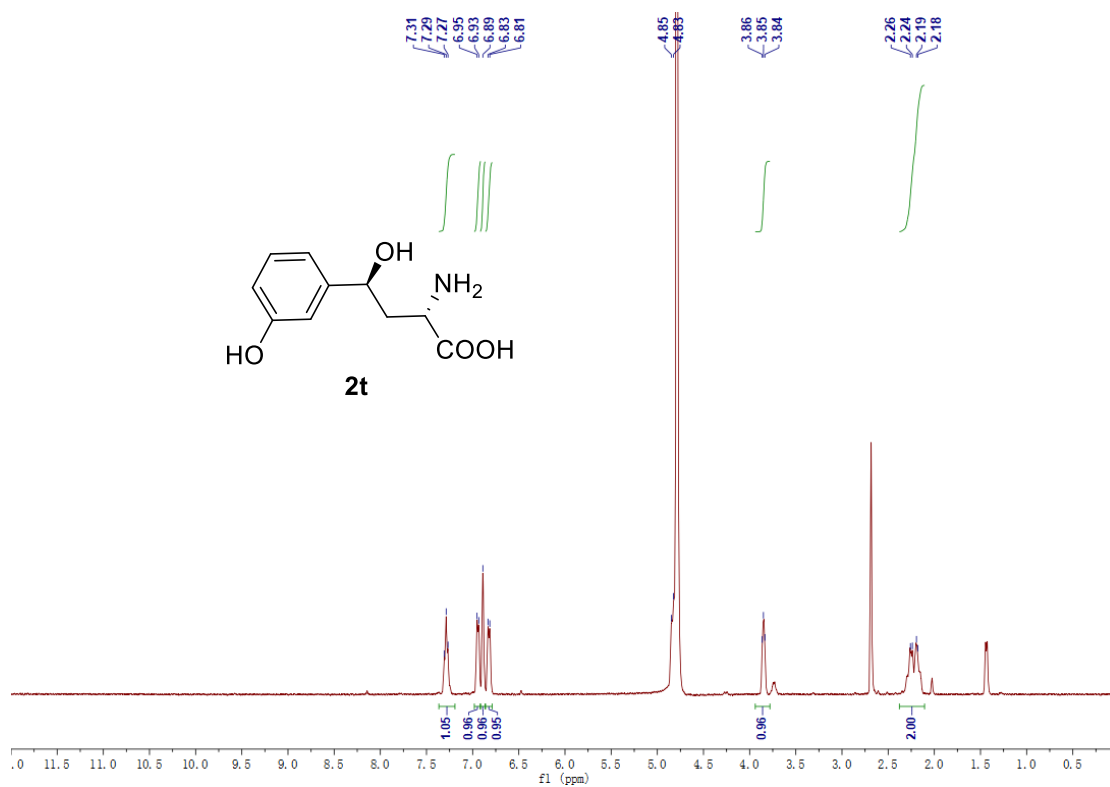

—174.3 —155.8 —145.1 —130.3 —117.7 —114.9 —112.6 —70.7 —52.9 —37.9

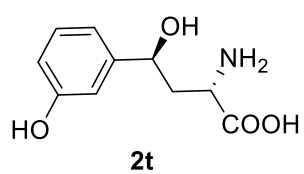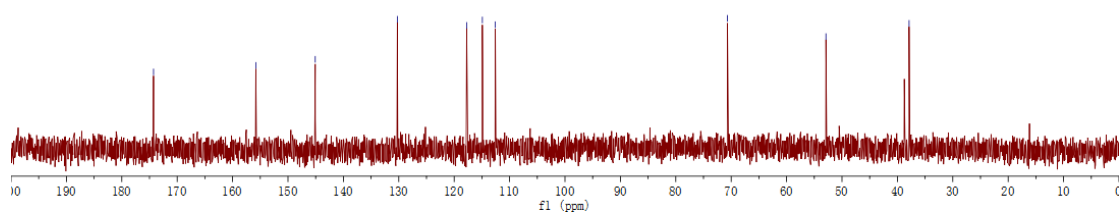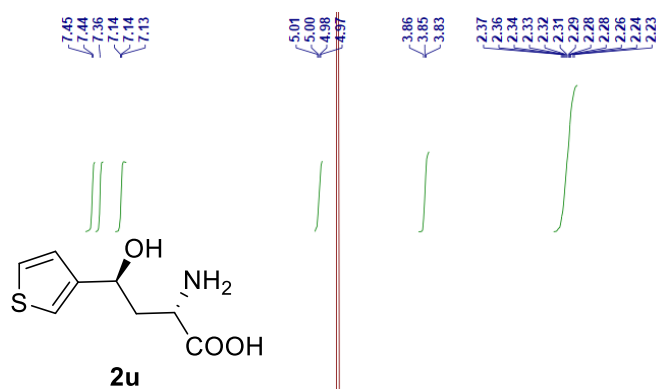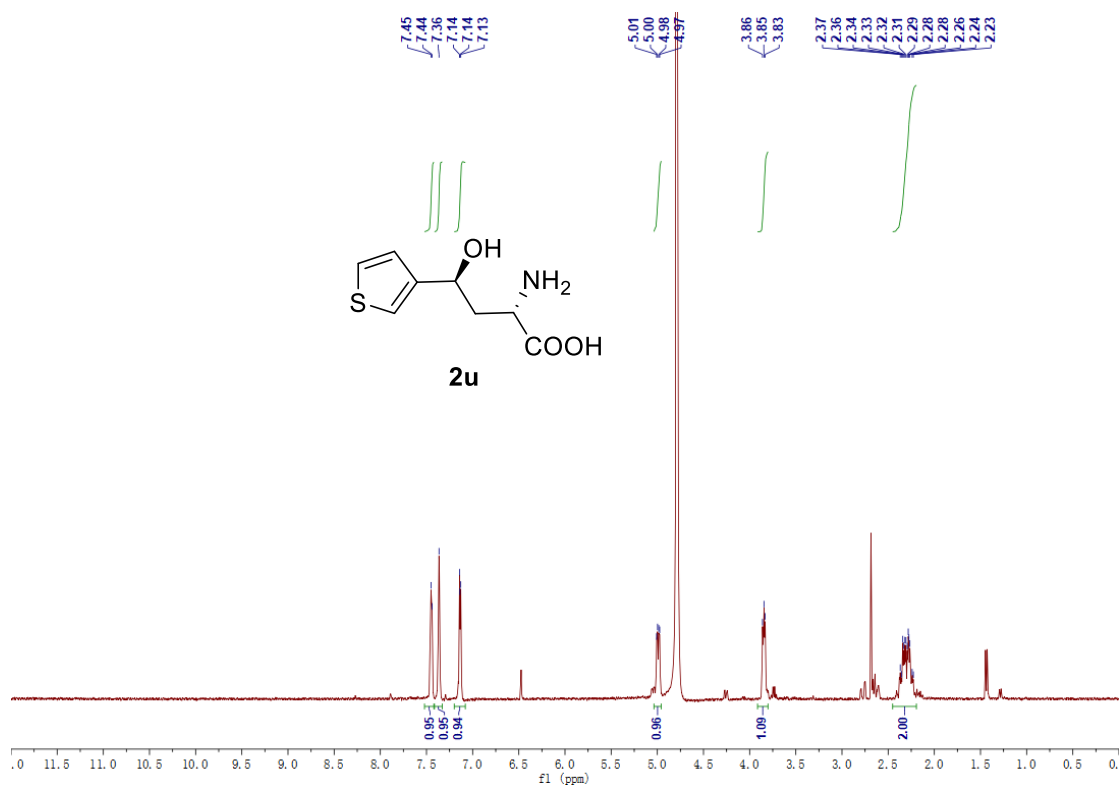

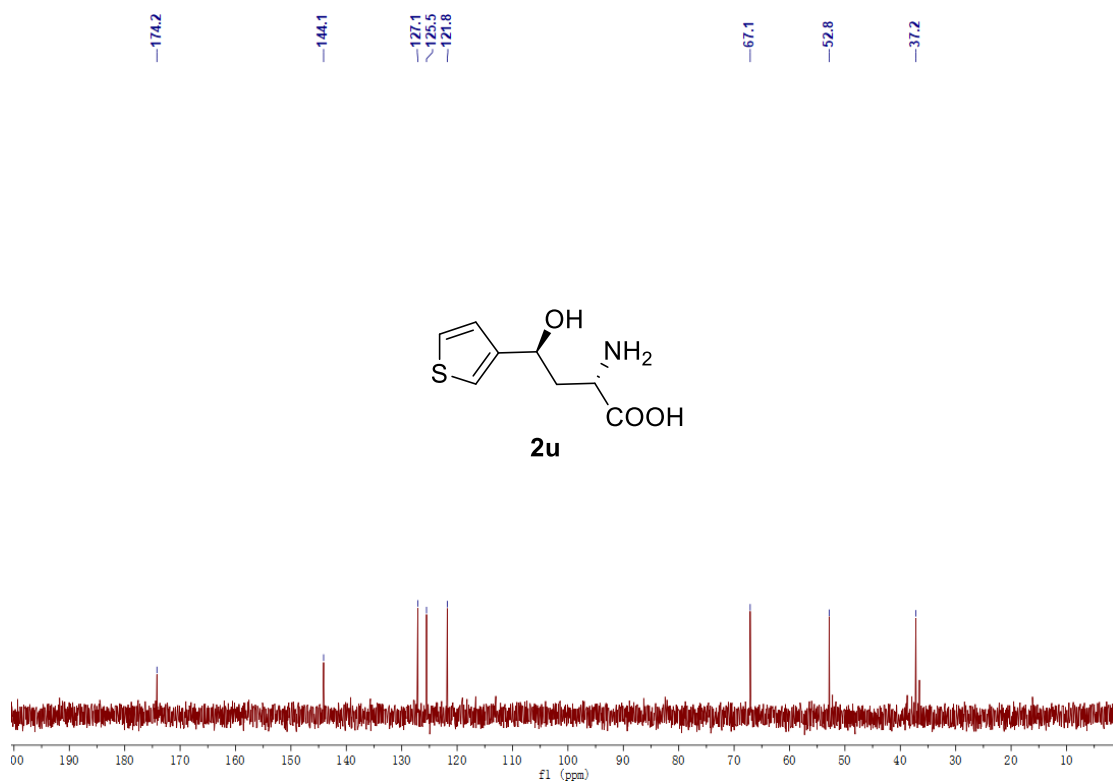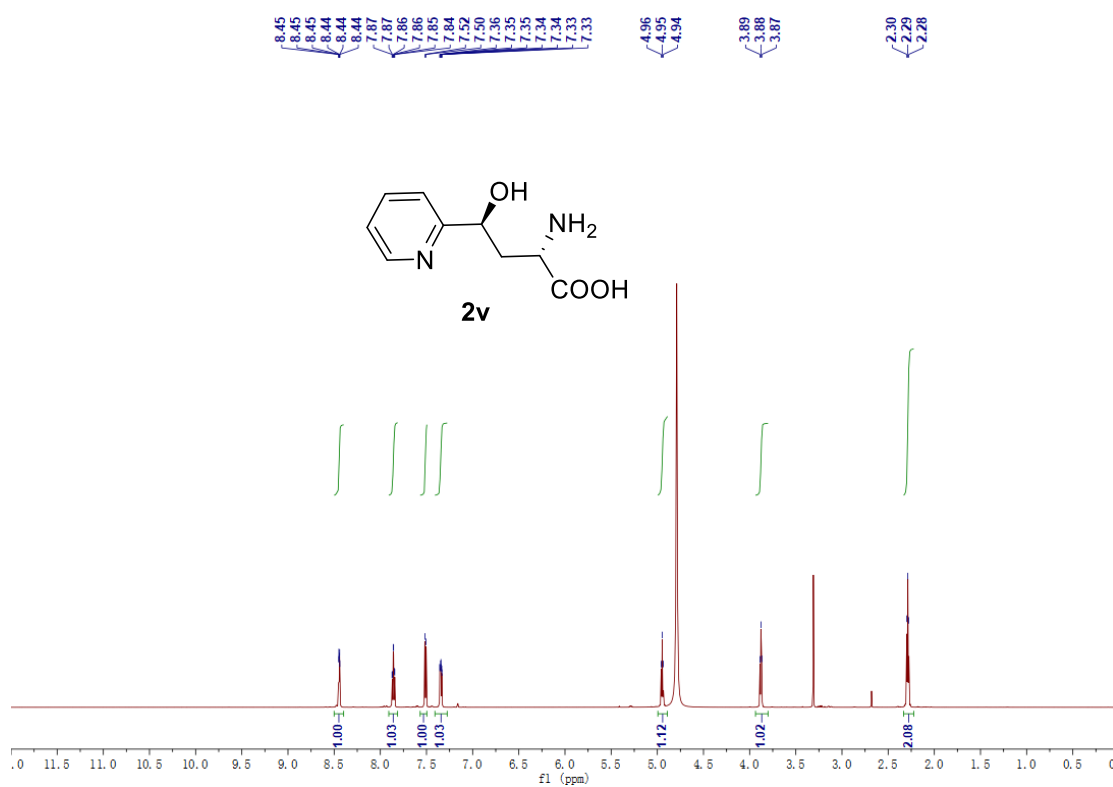

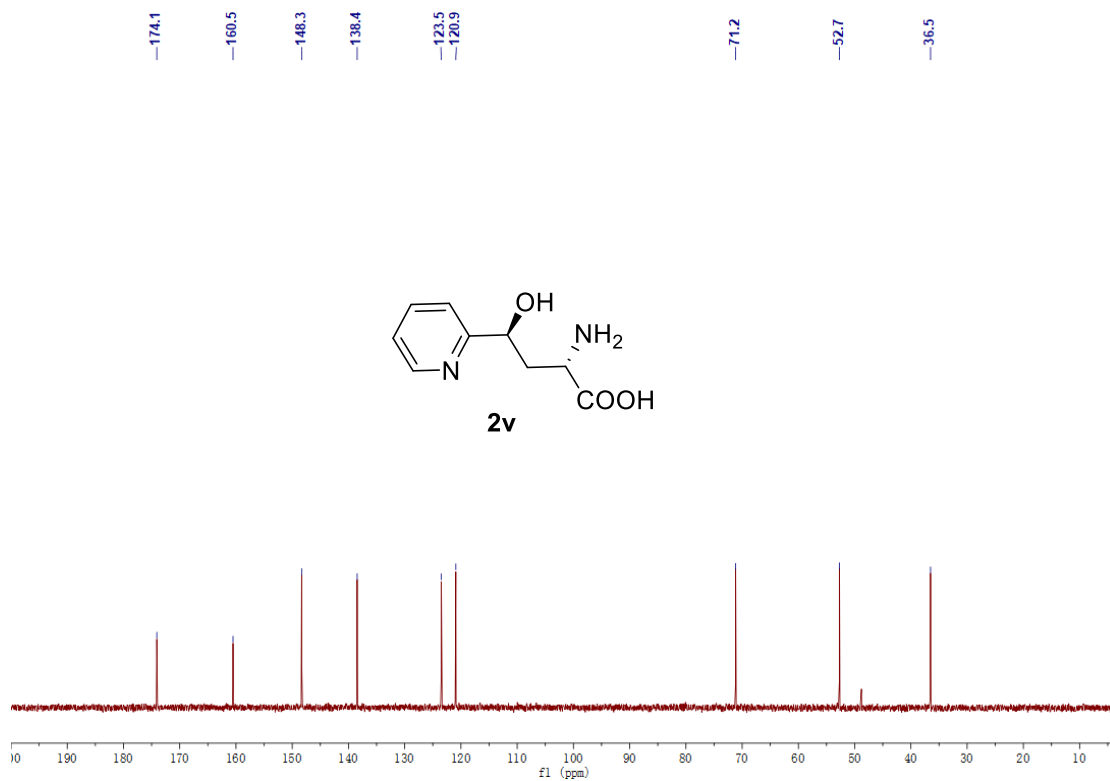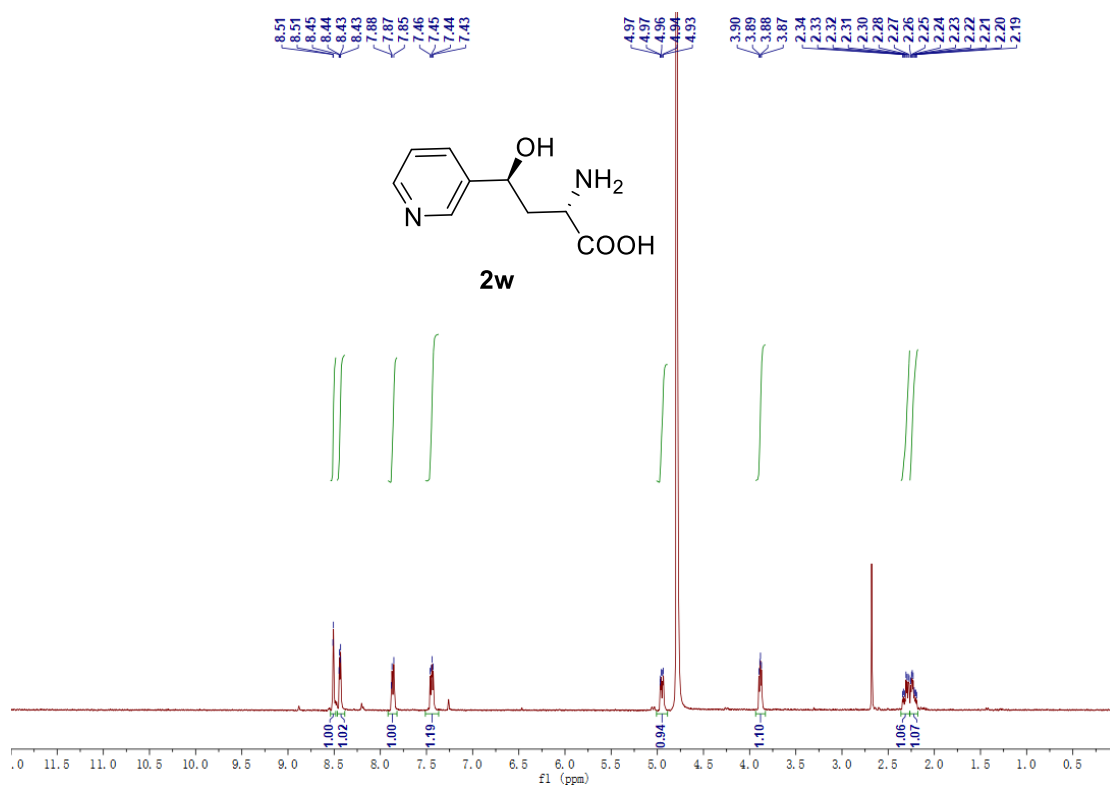

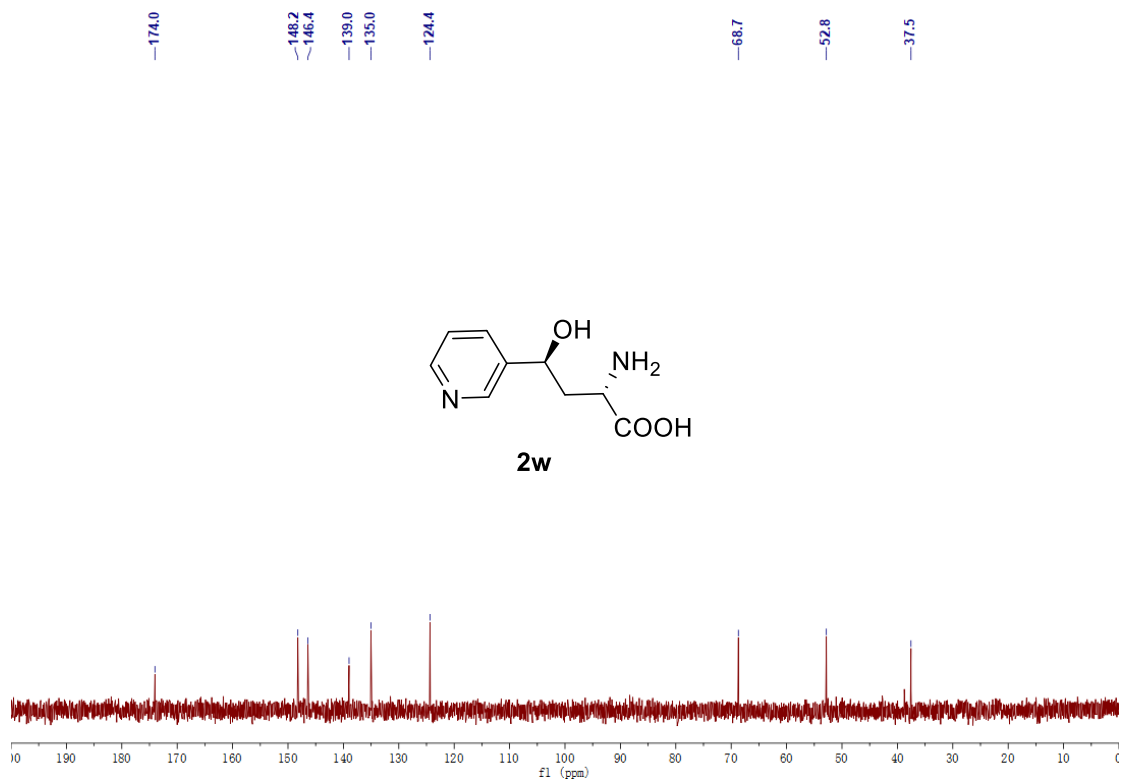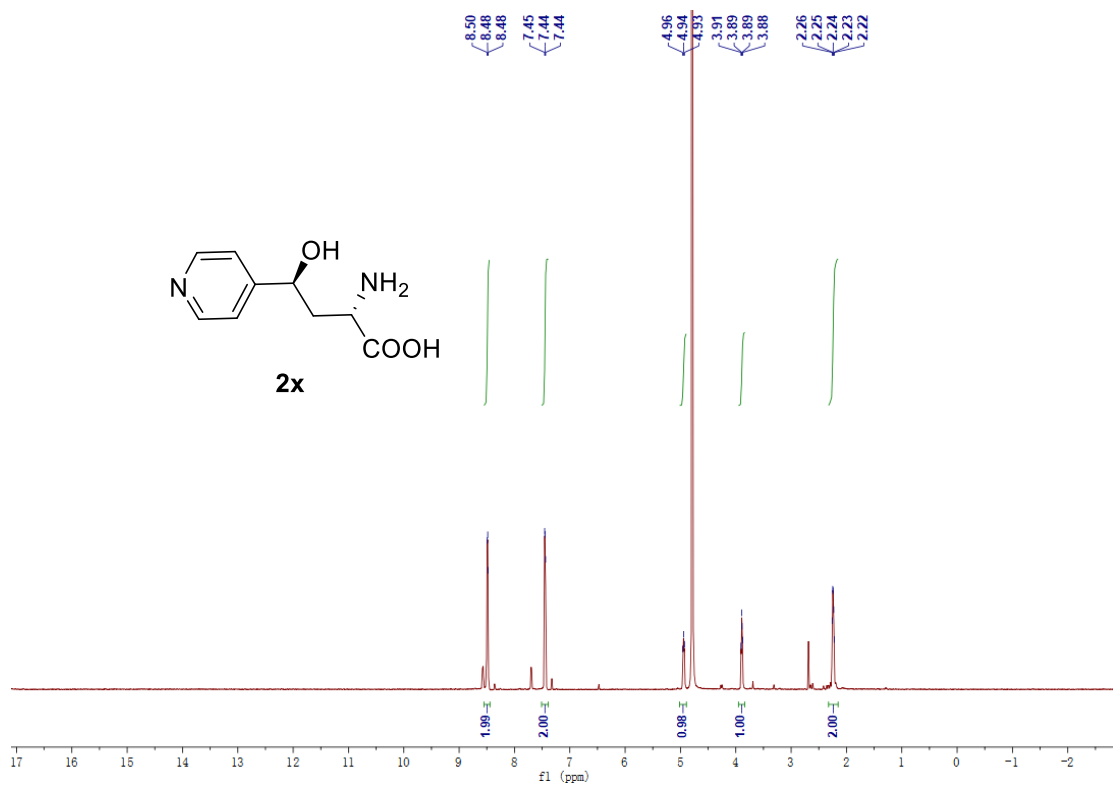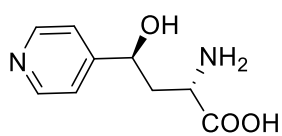



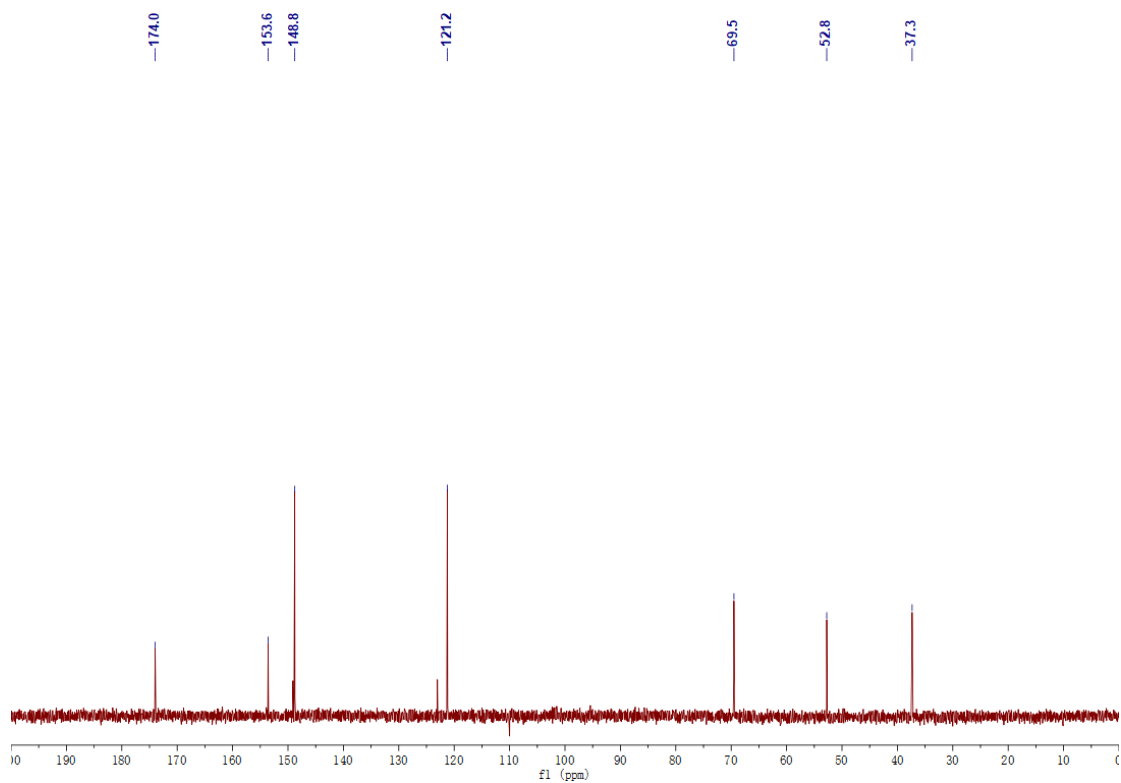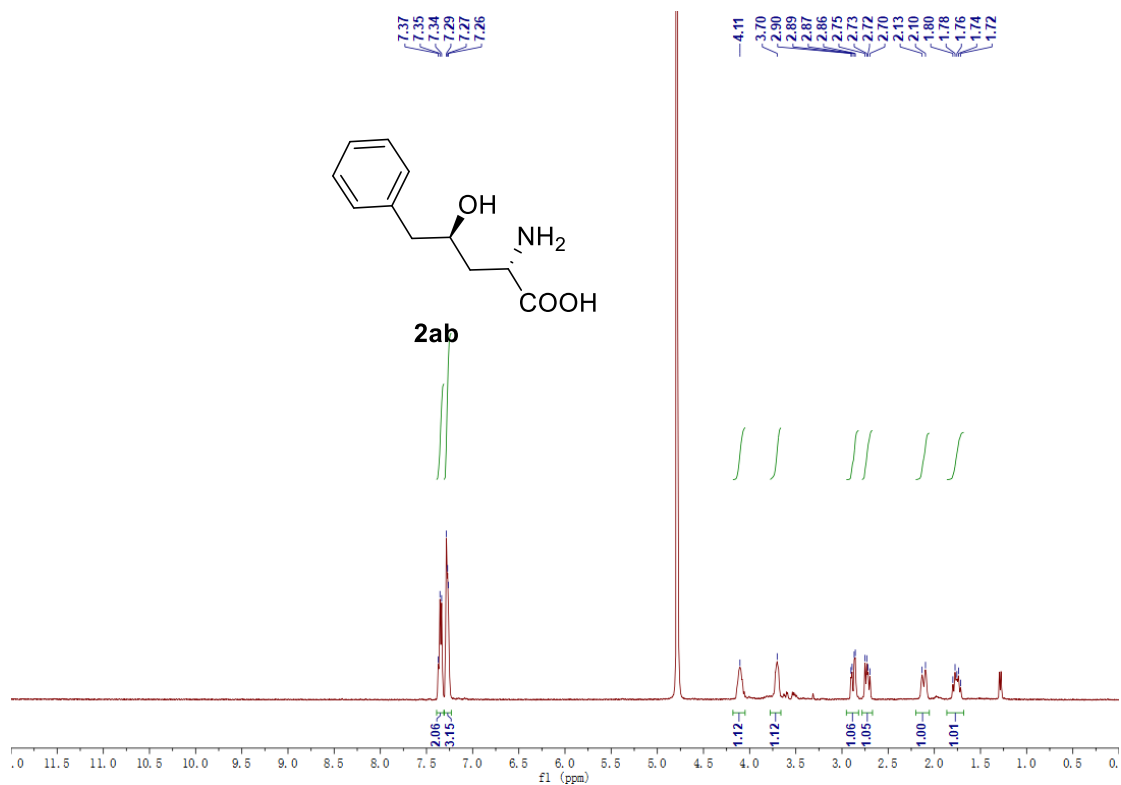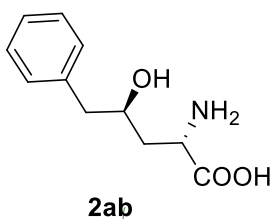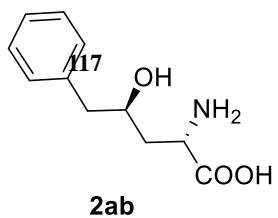

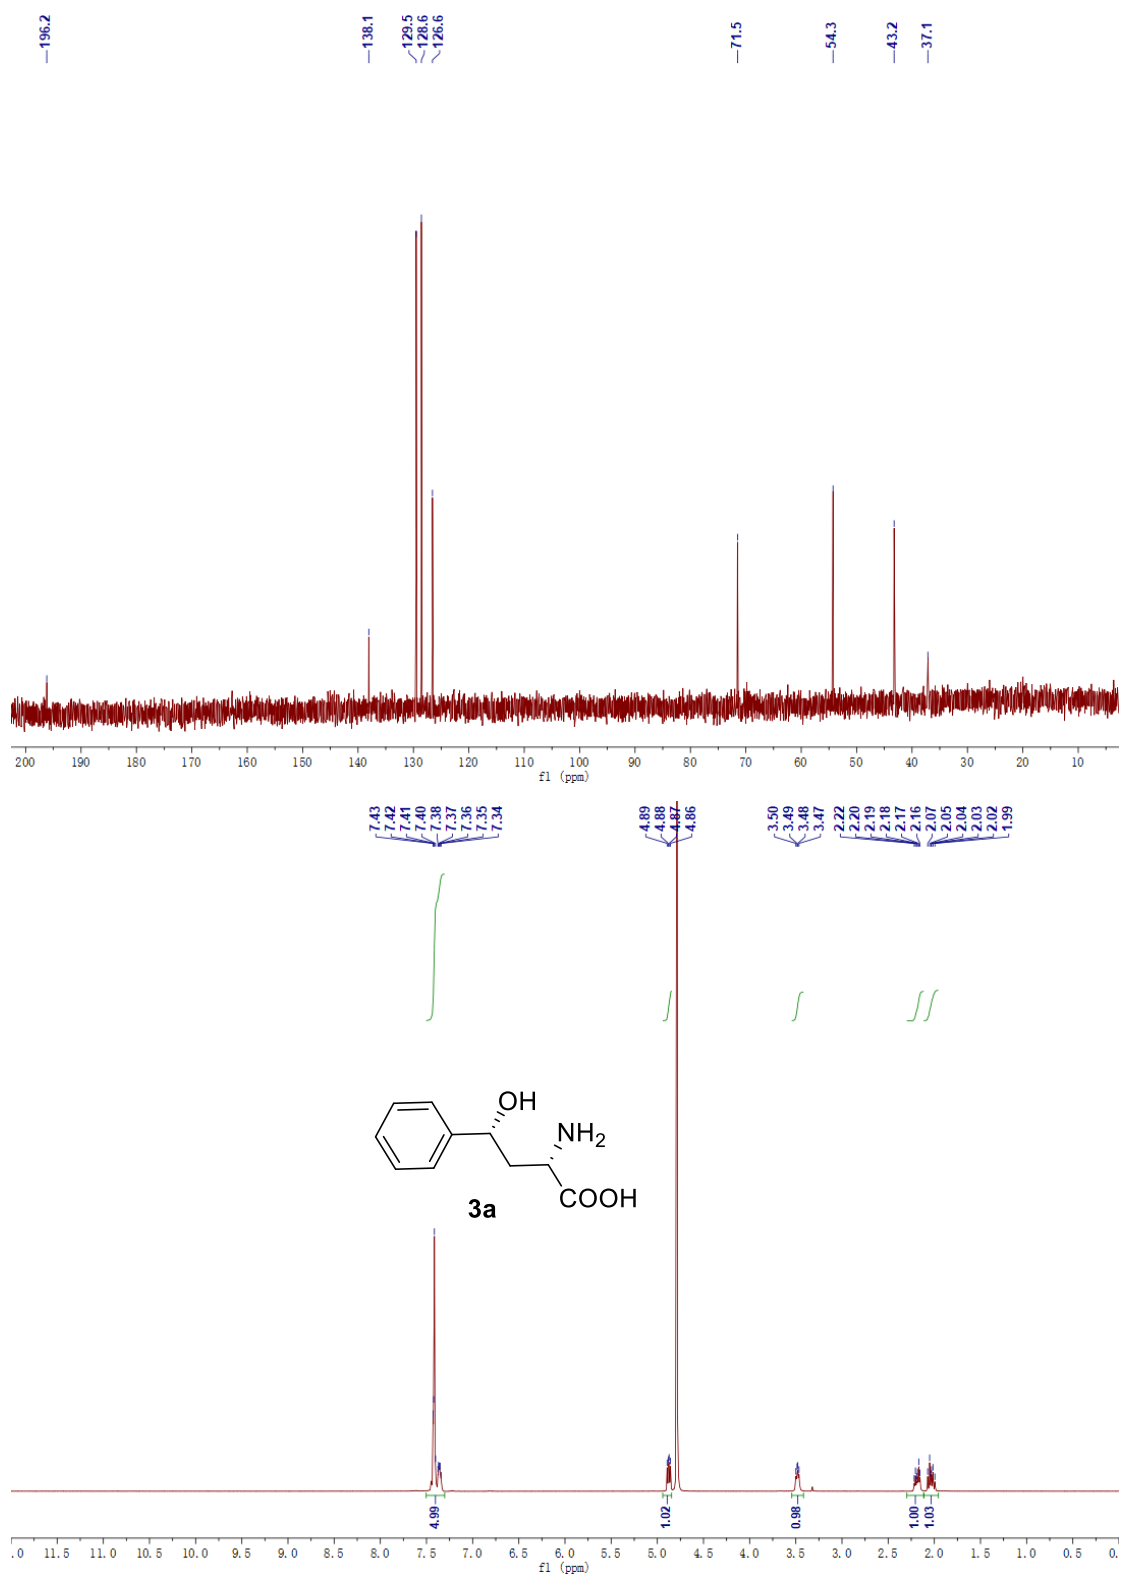

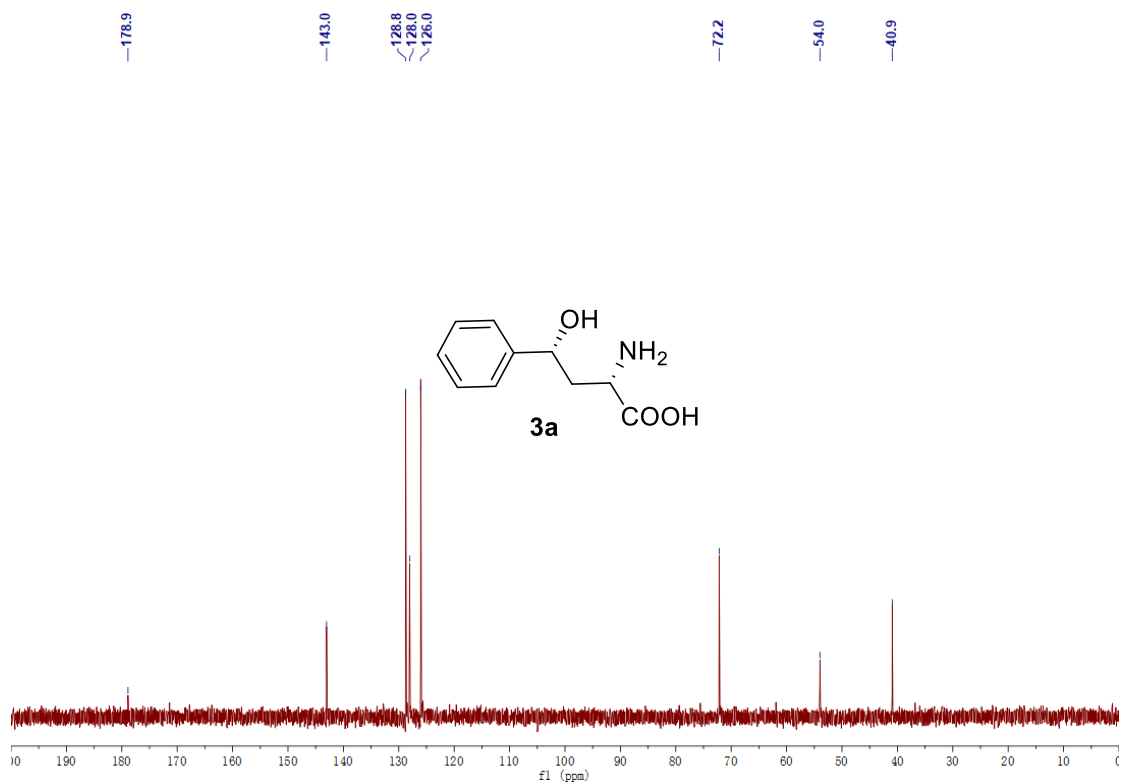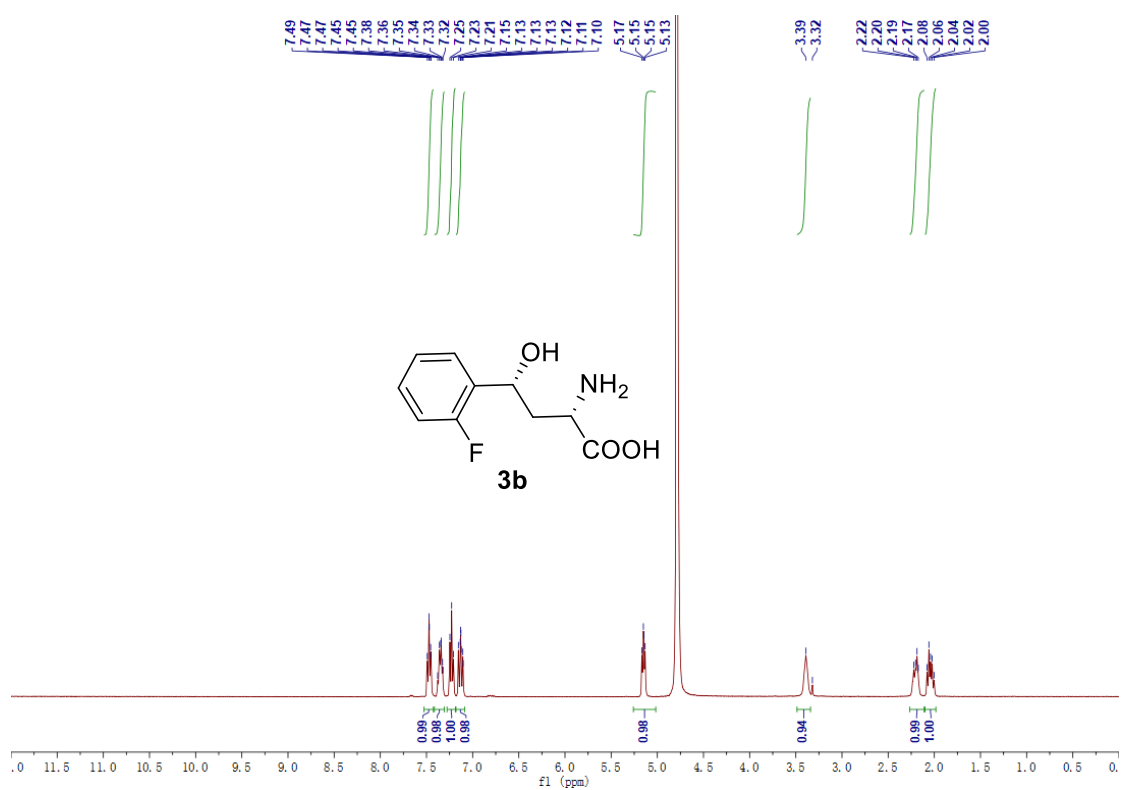

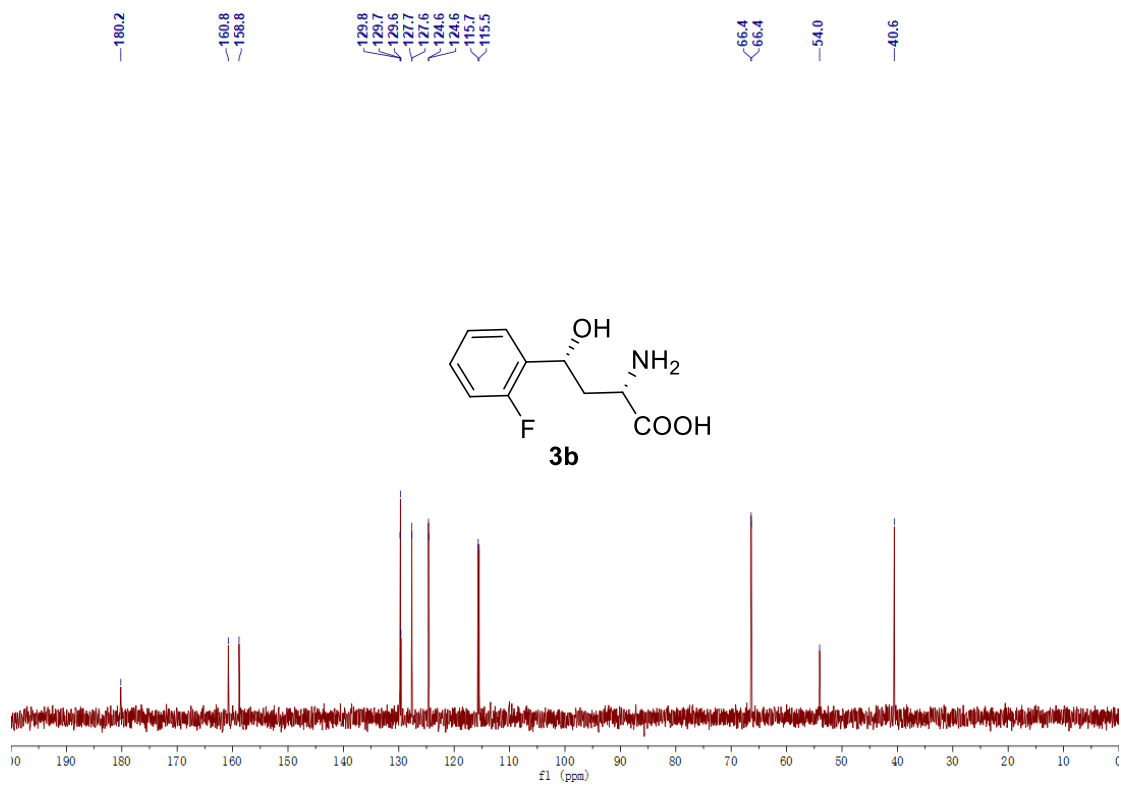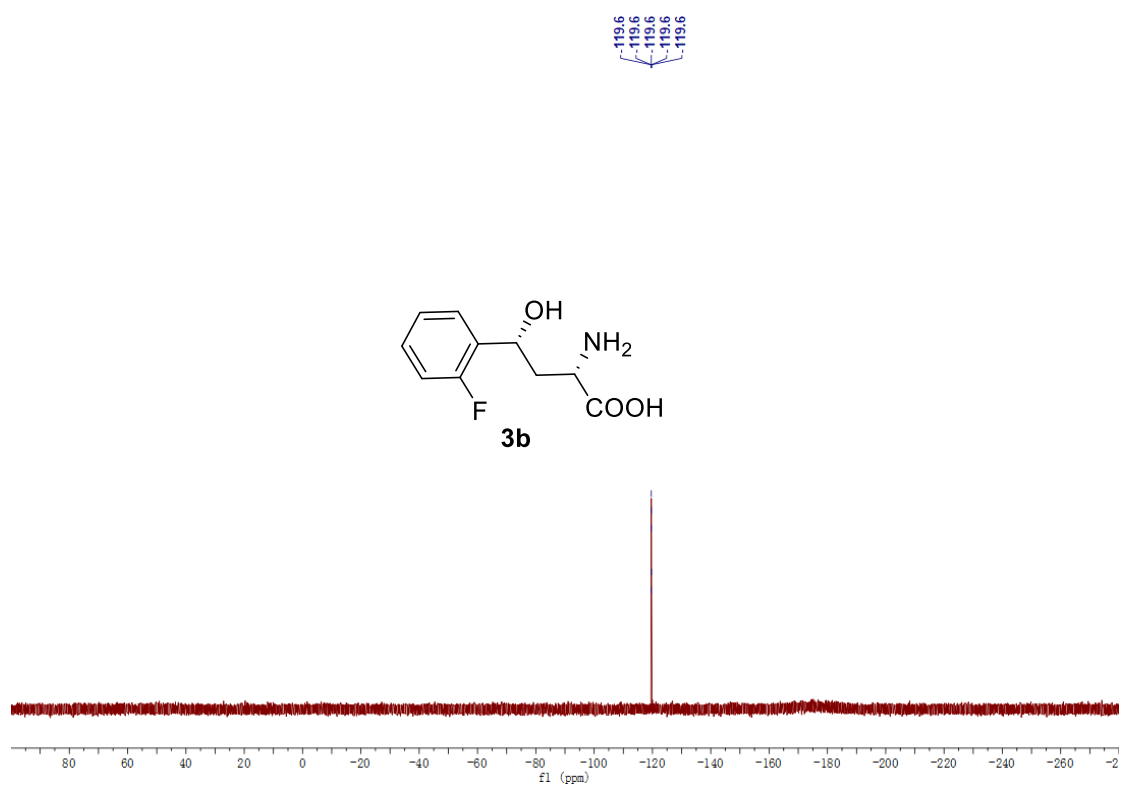

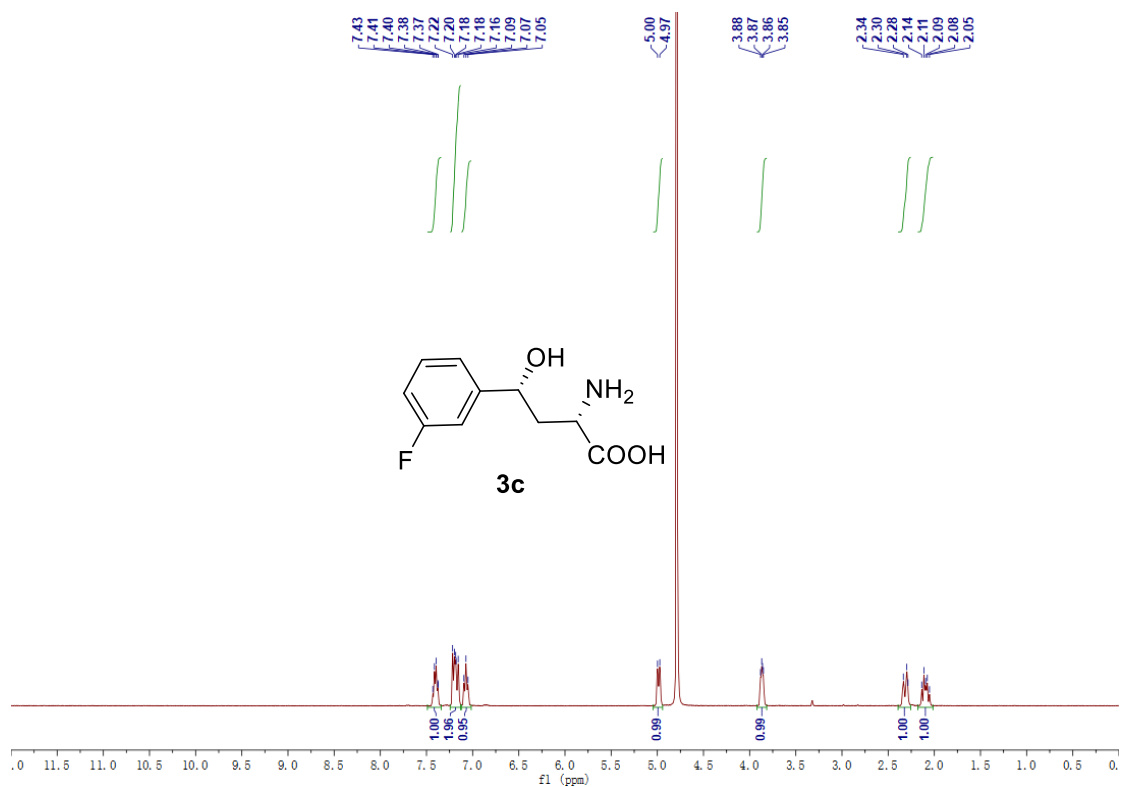

174.2

163.9  
161.5

145.7

130.5  
130.4

121.5

114.8  
114.6

112.6  
112.3

71.6

53.8

38.4

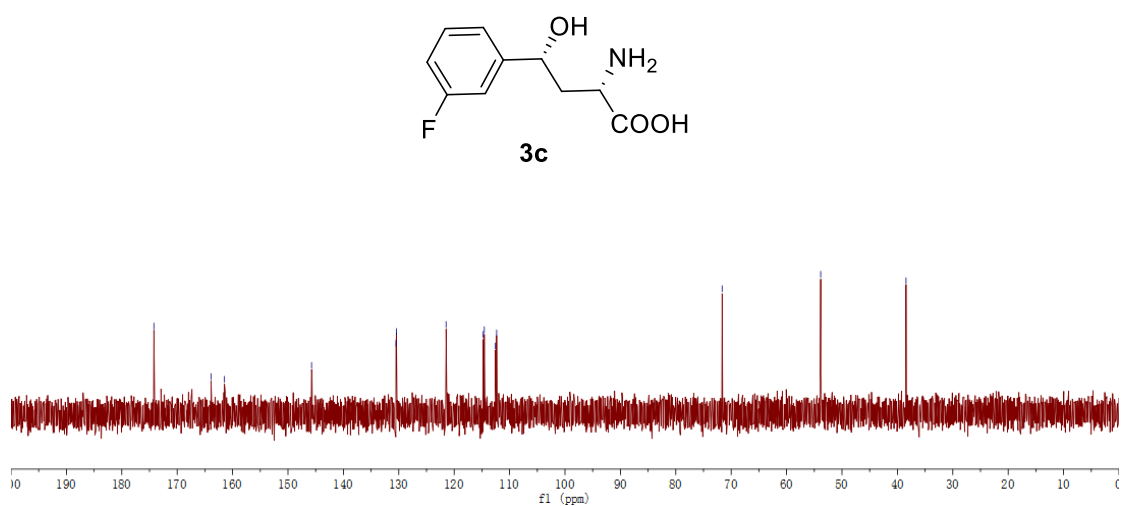

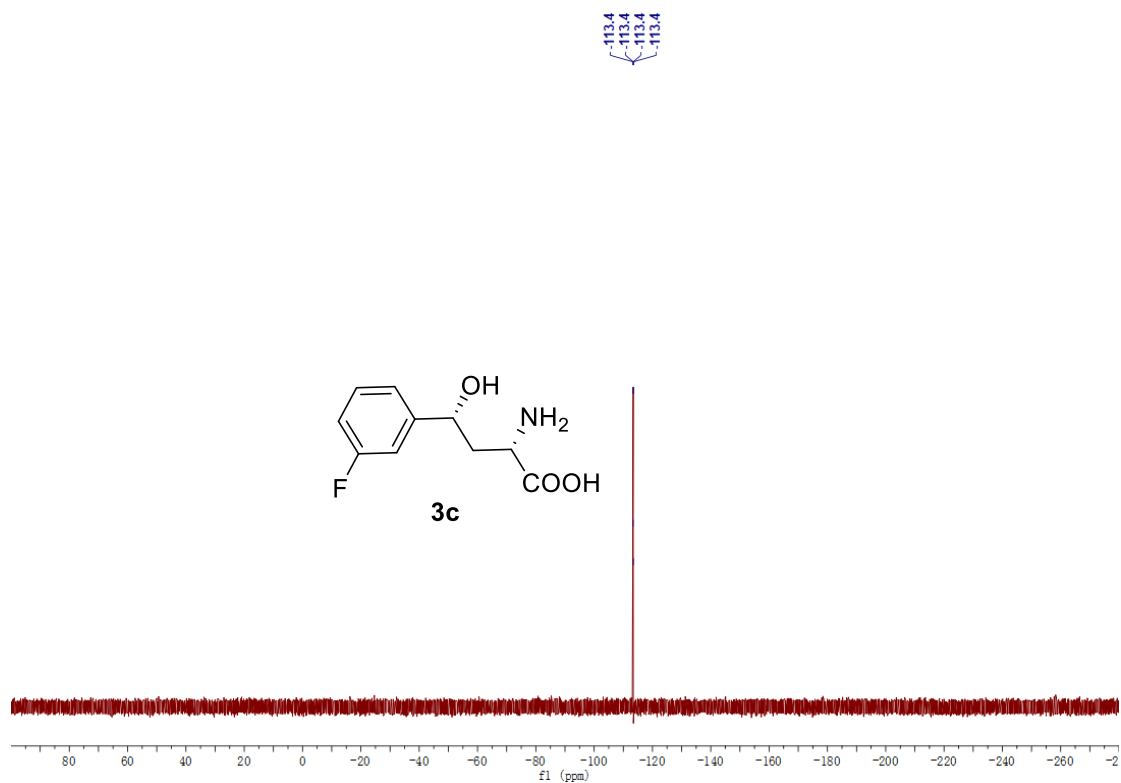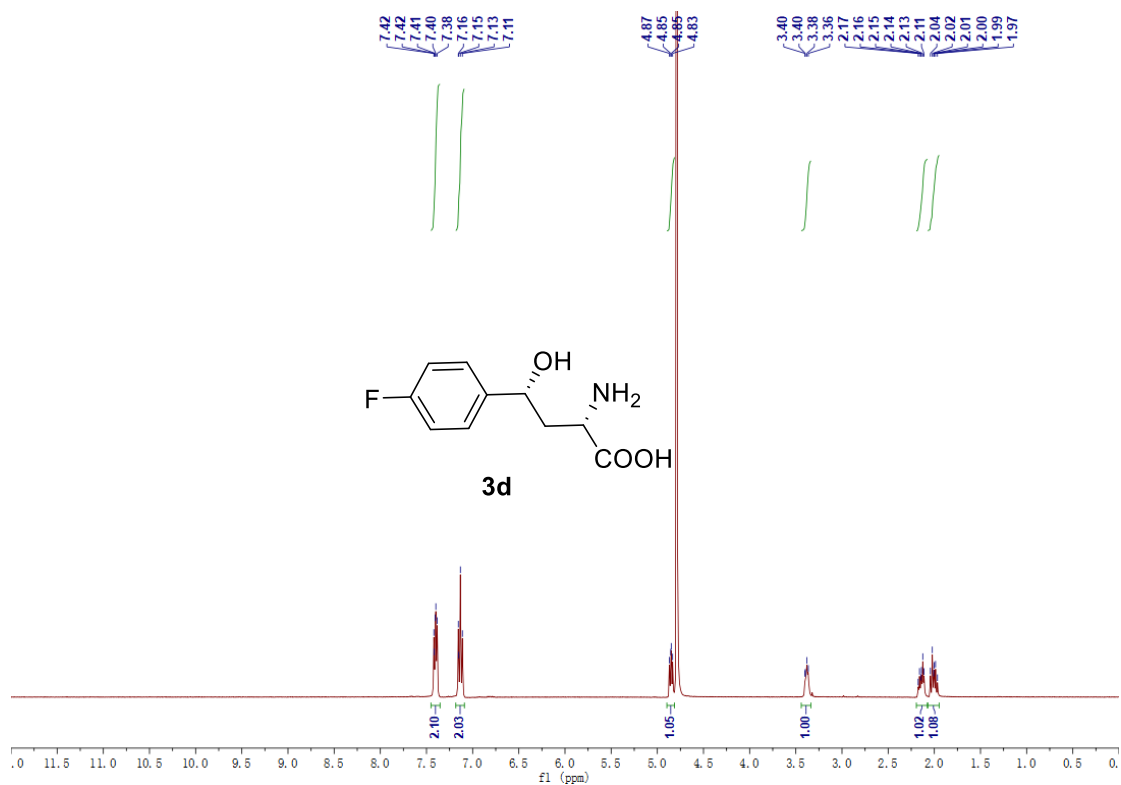

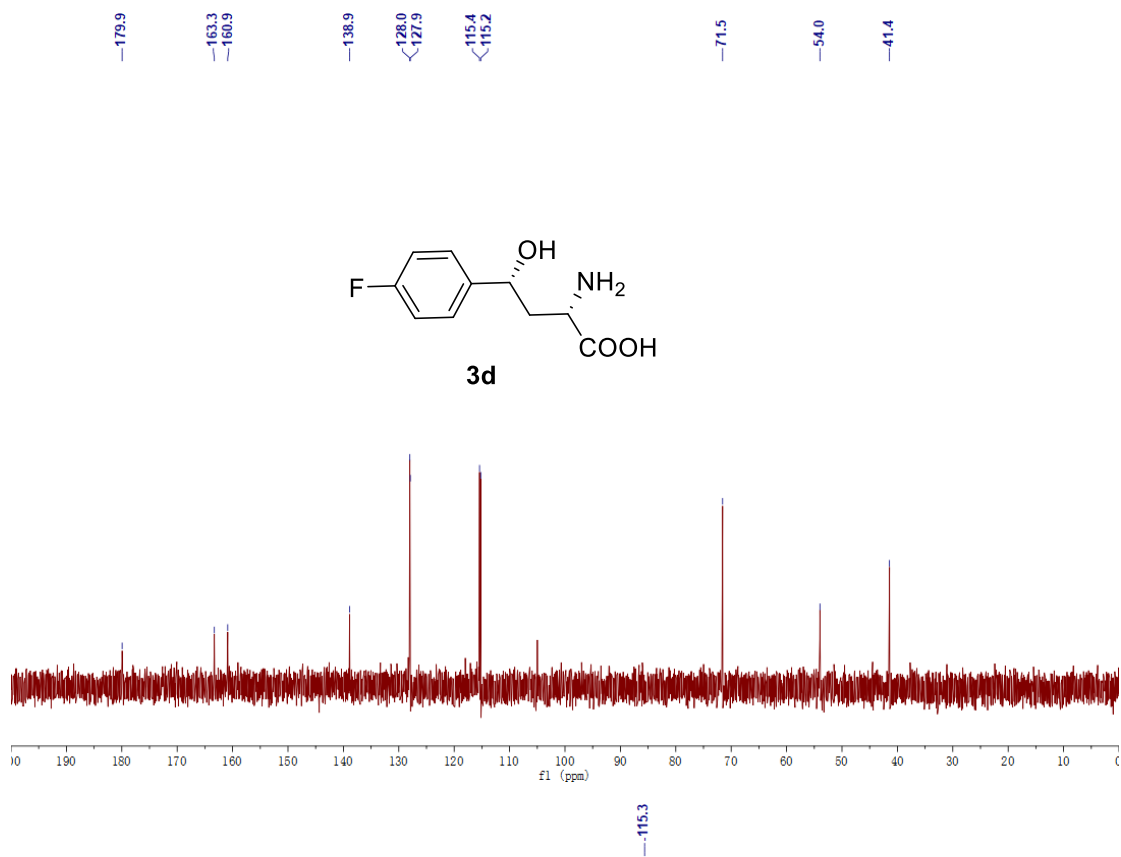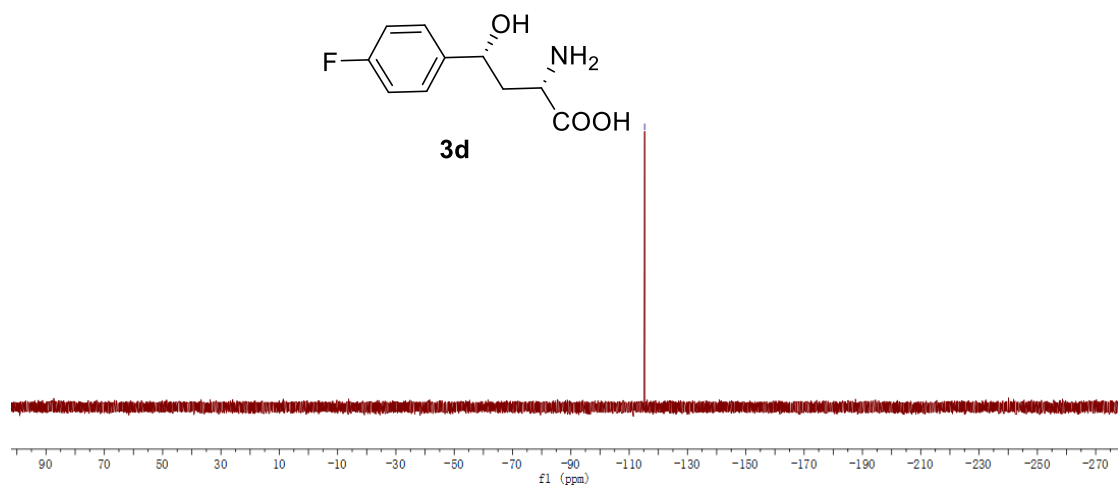

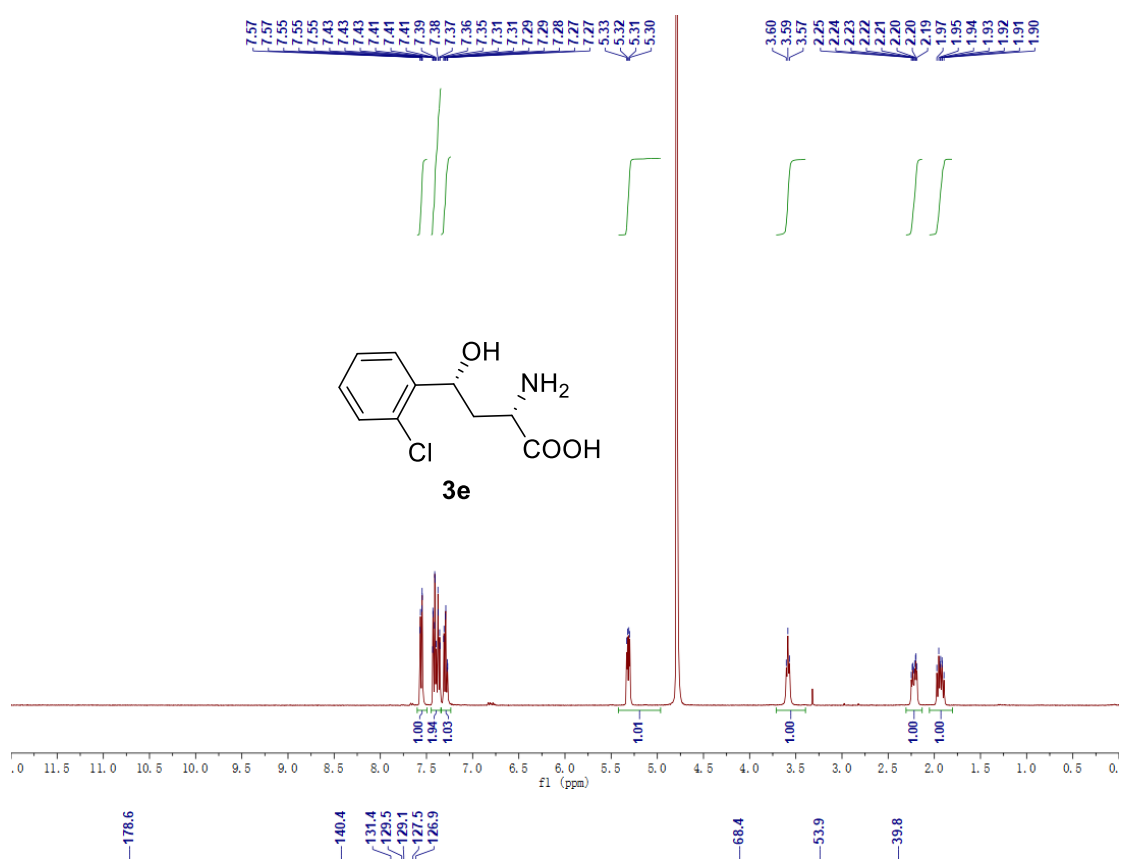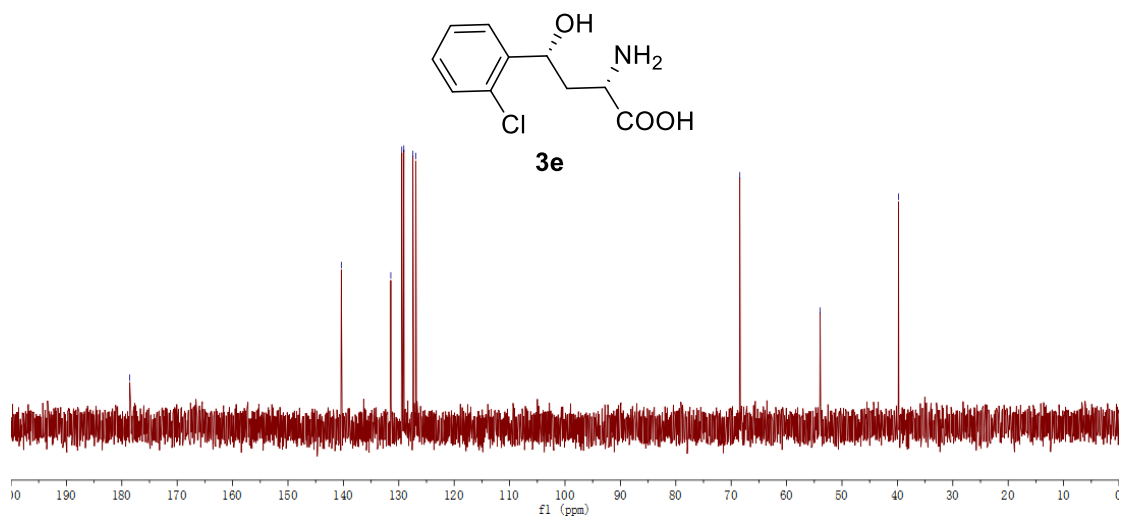



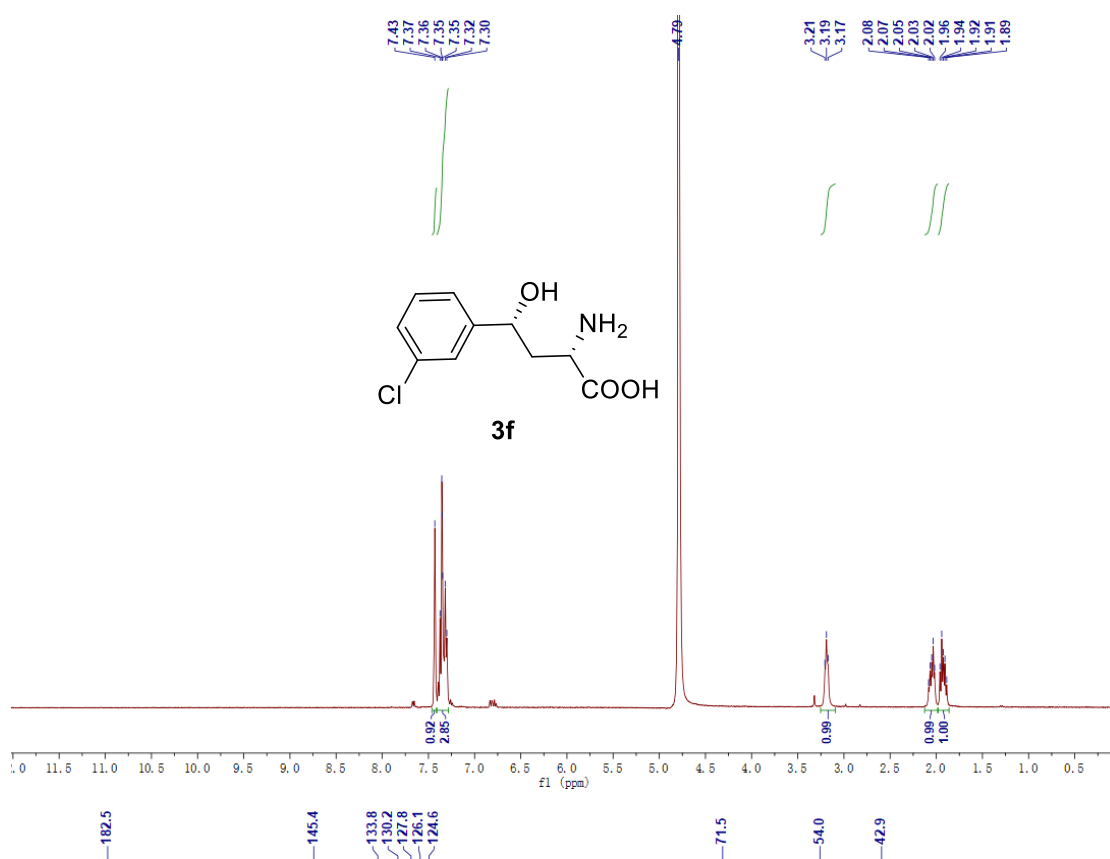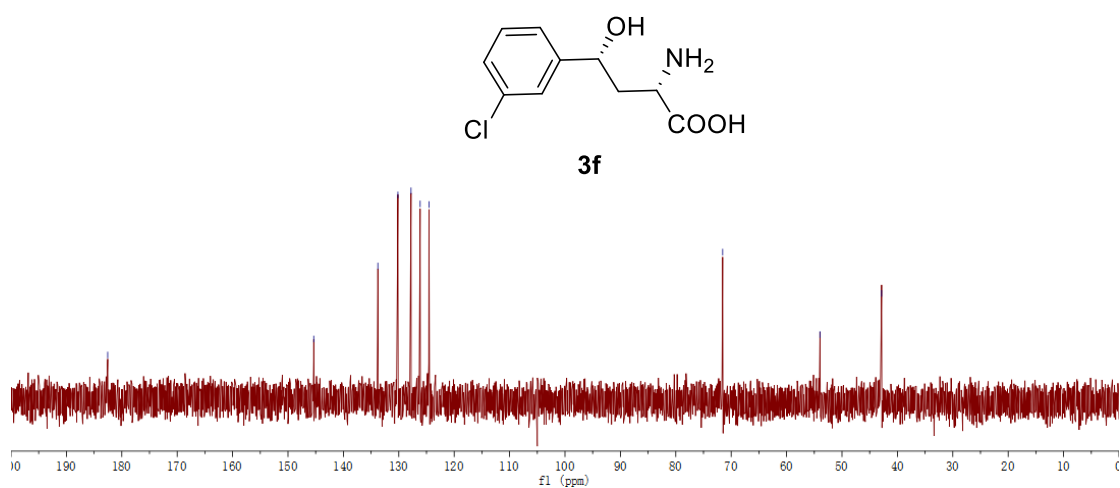

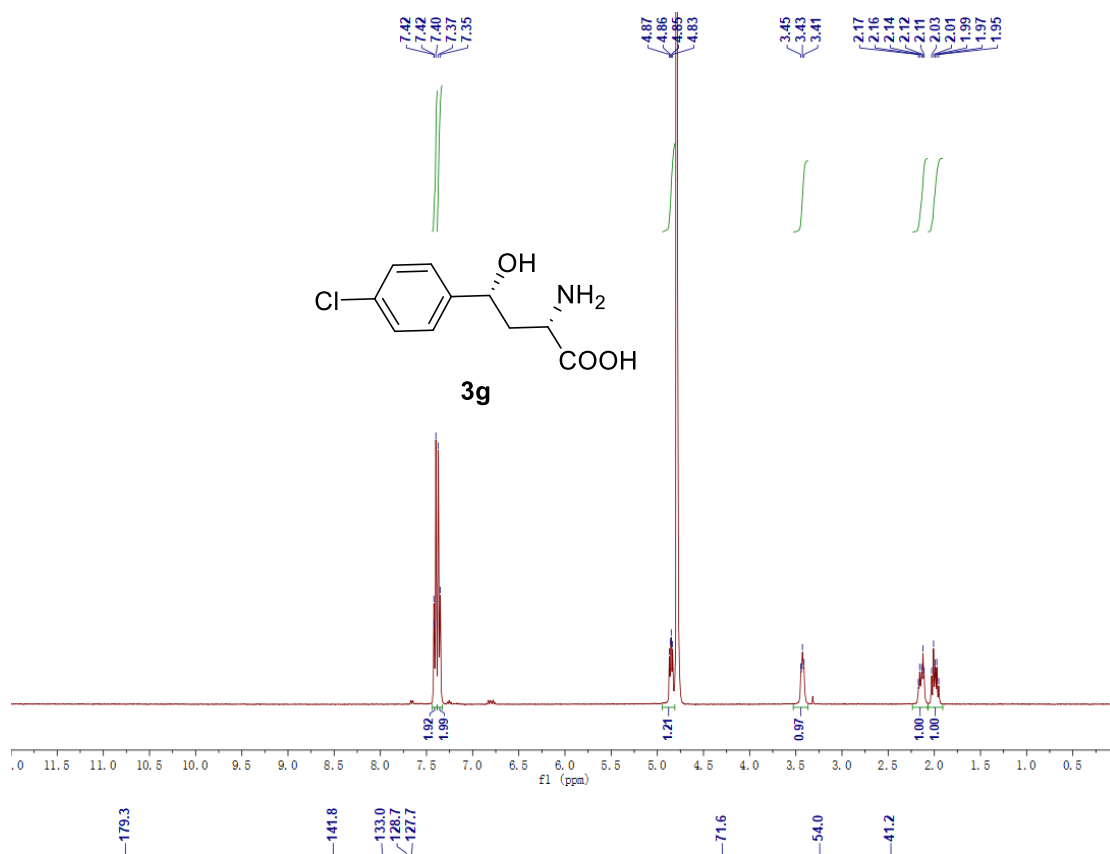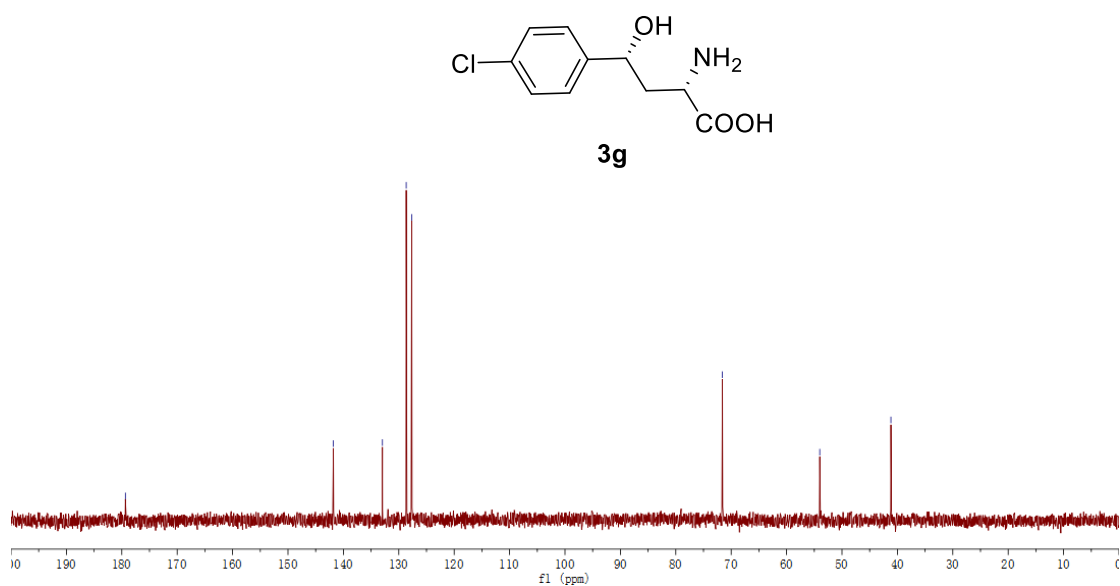

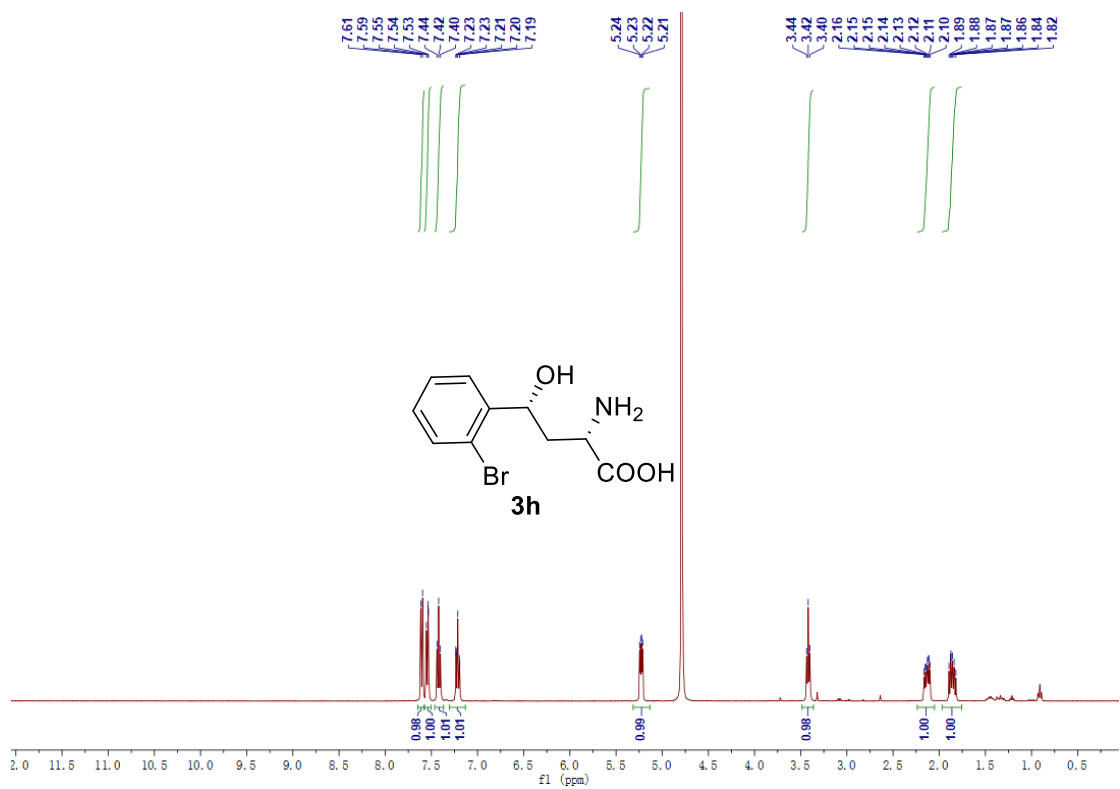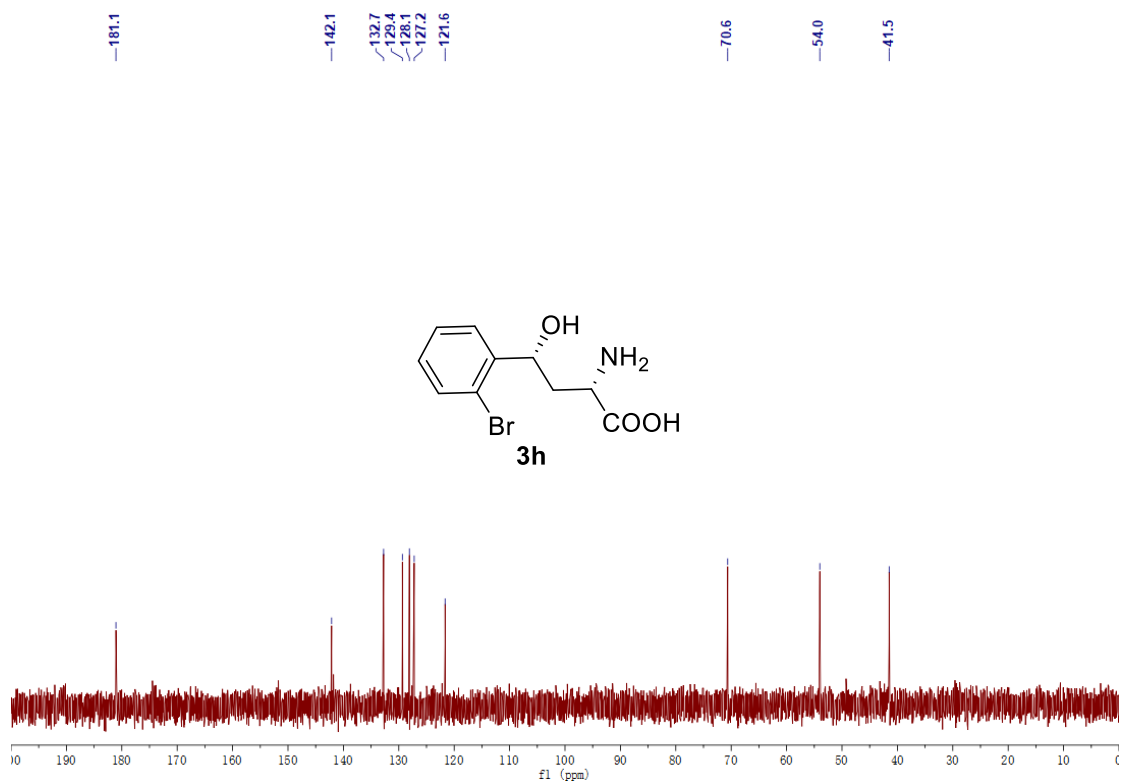

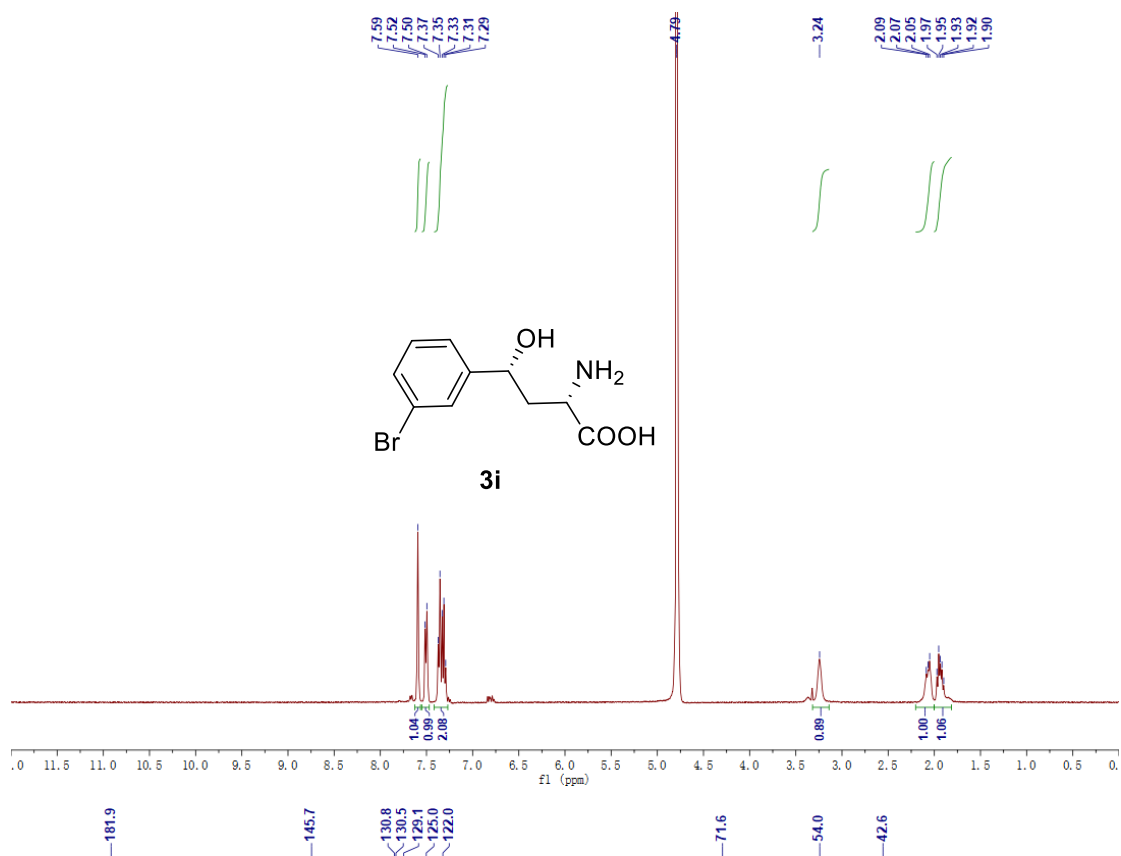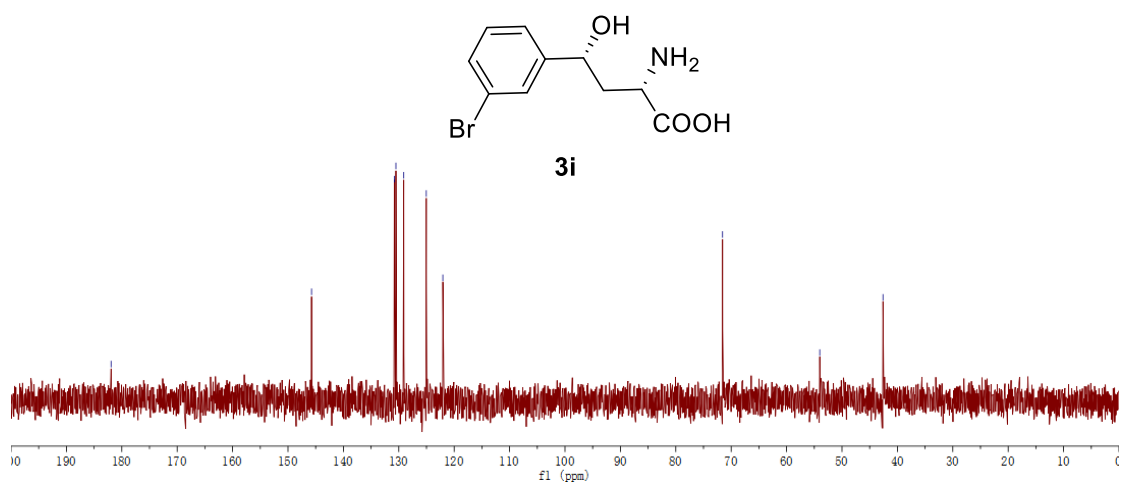

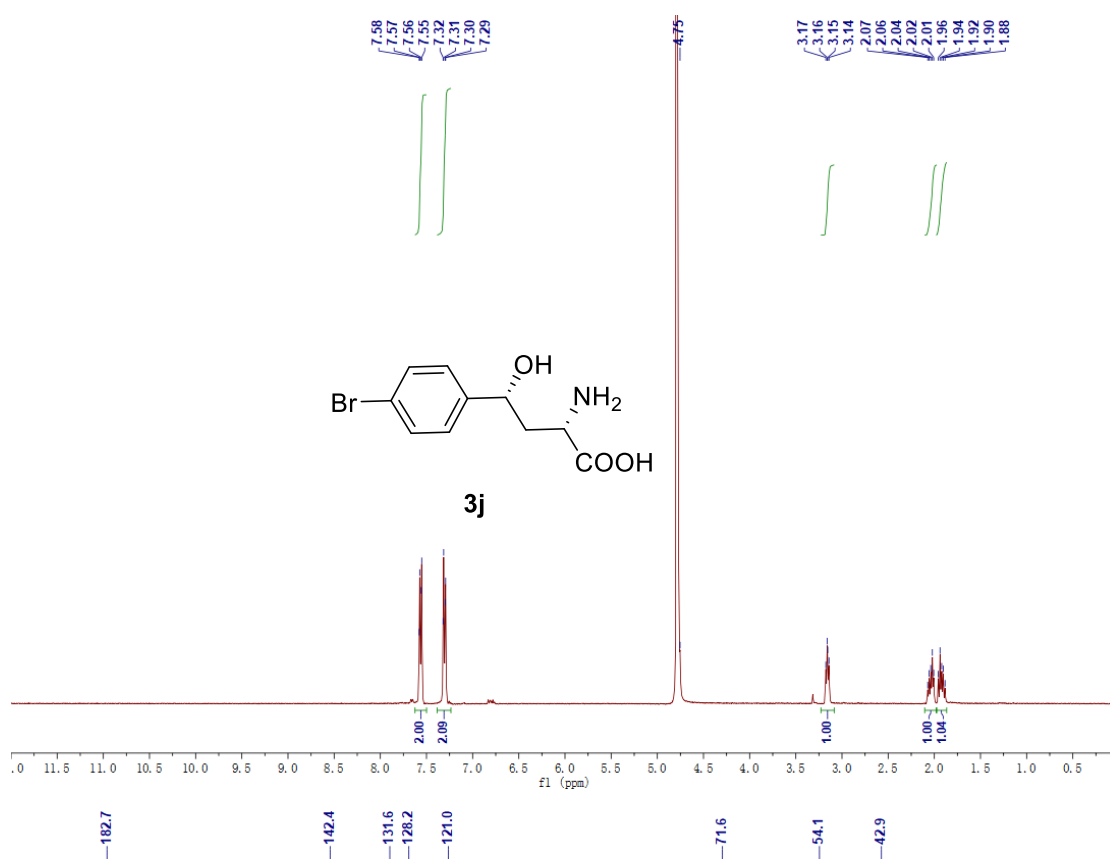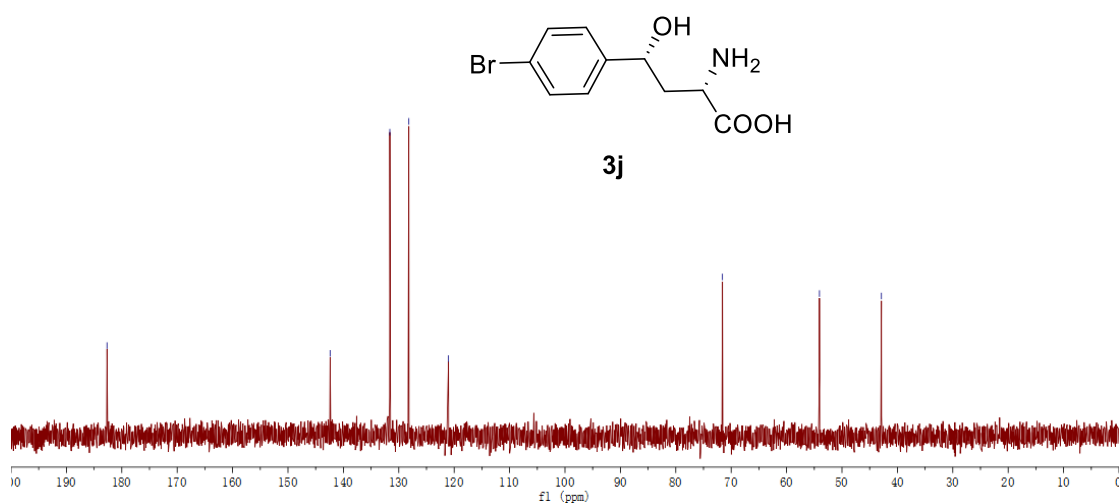

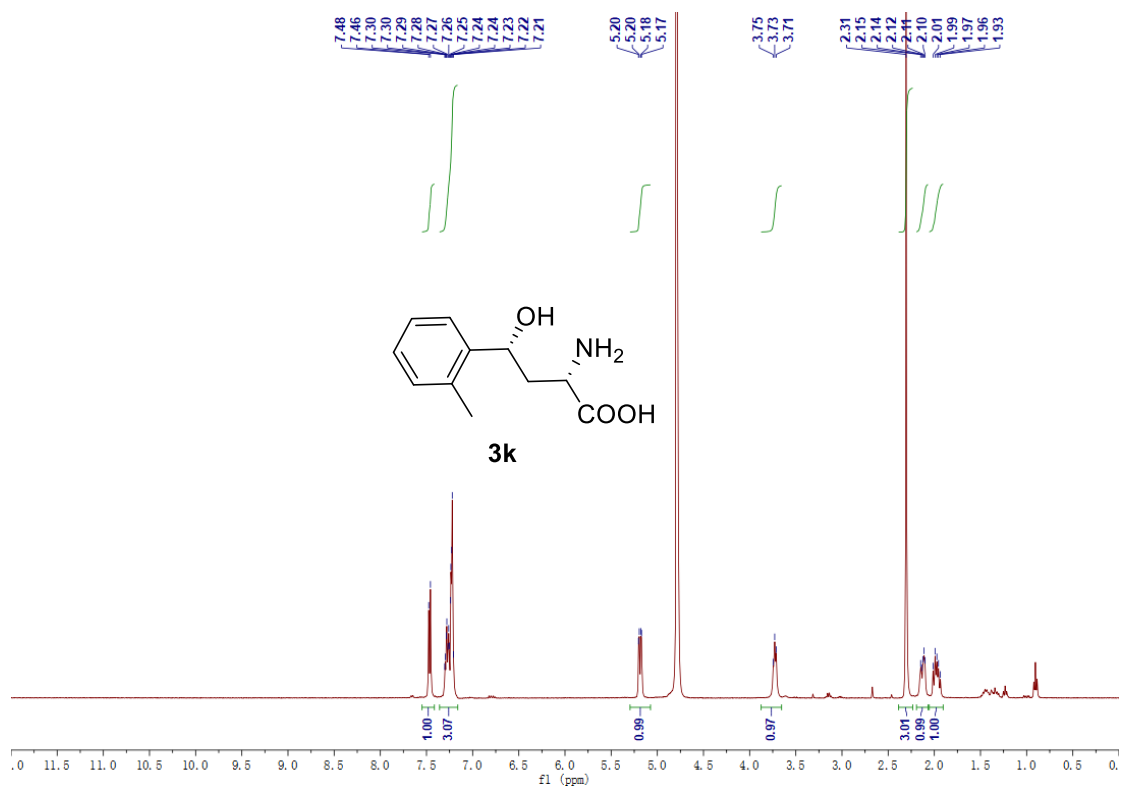

—176.9

—141.4

—134.9

—130.5

—127.7

—126.4

—125.0

—68.4

—54.1

—39.3

—18.0

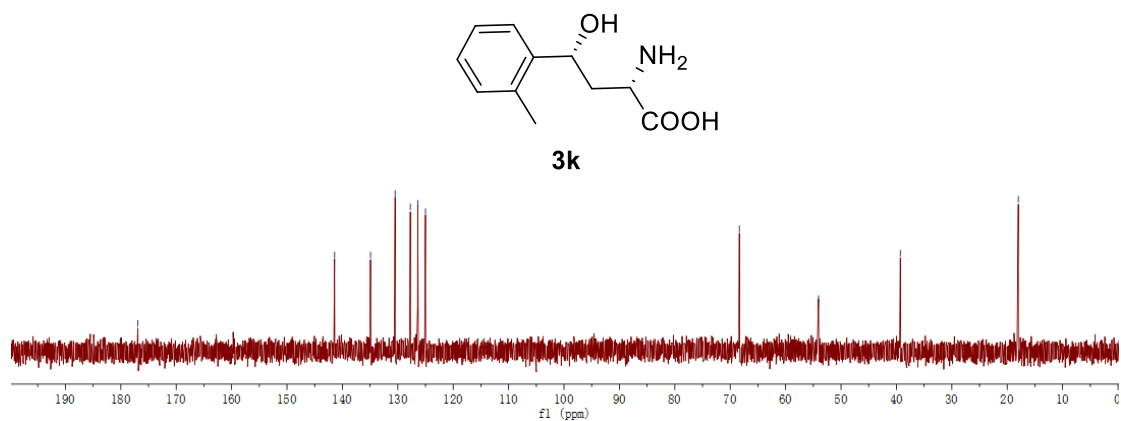

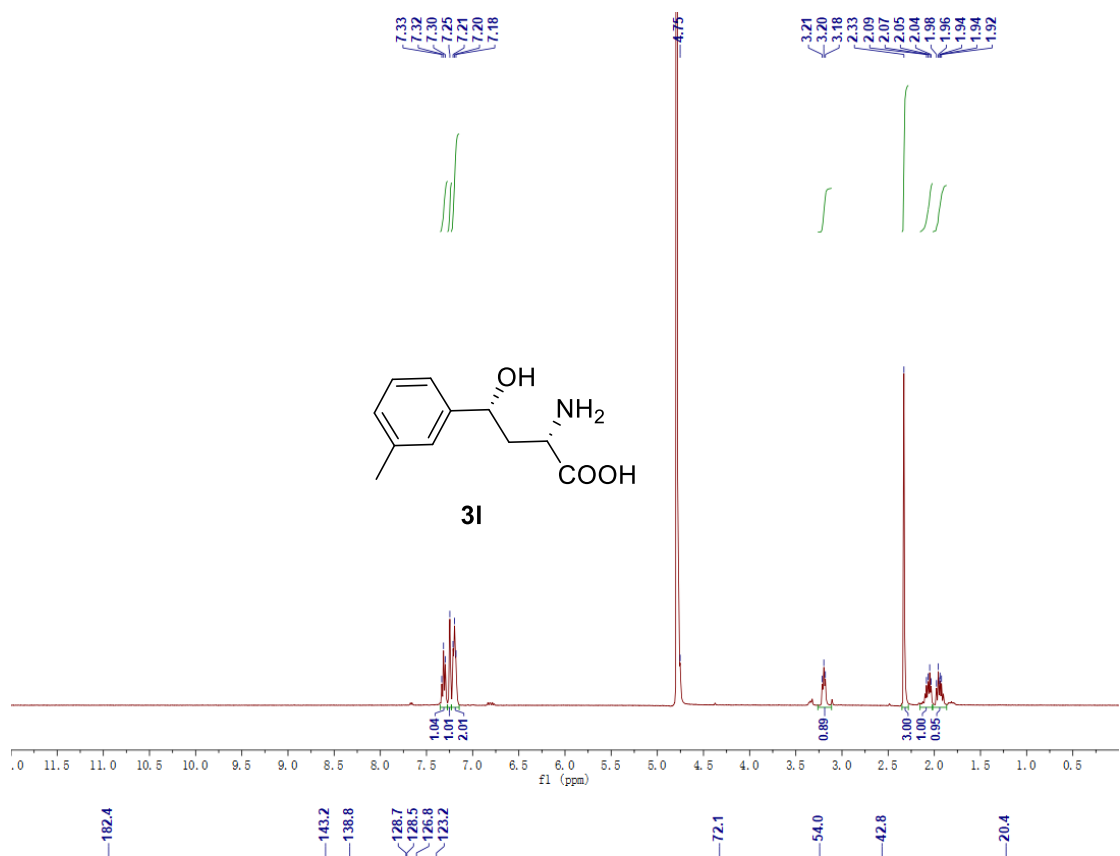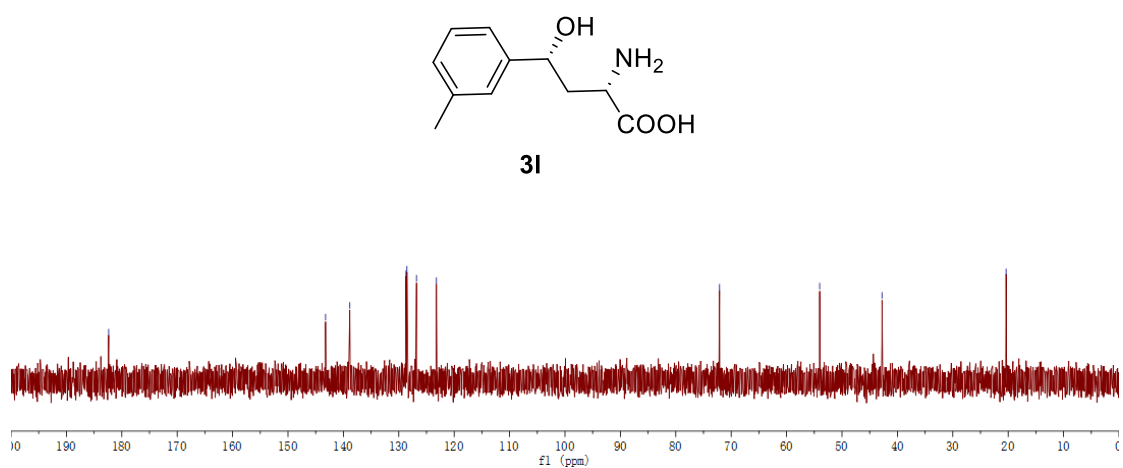

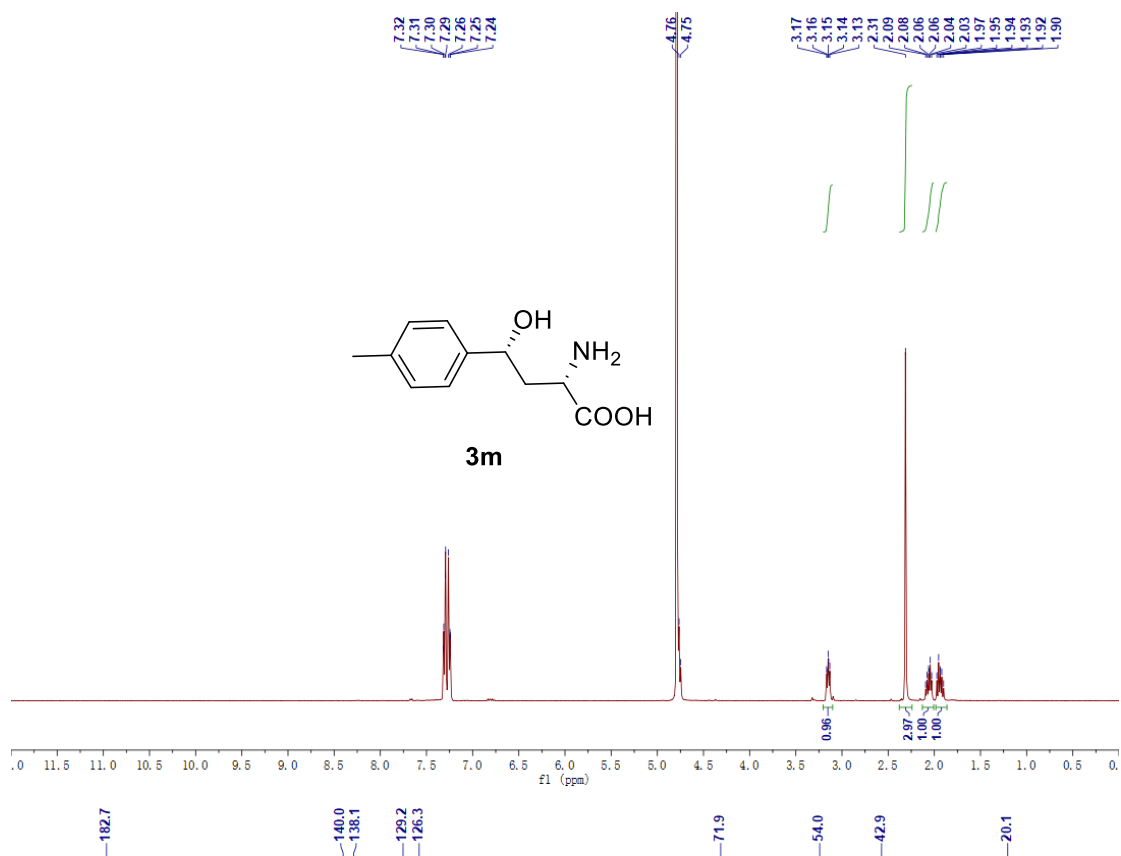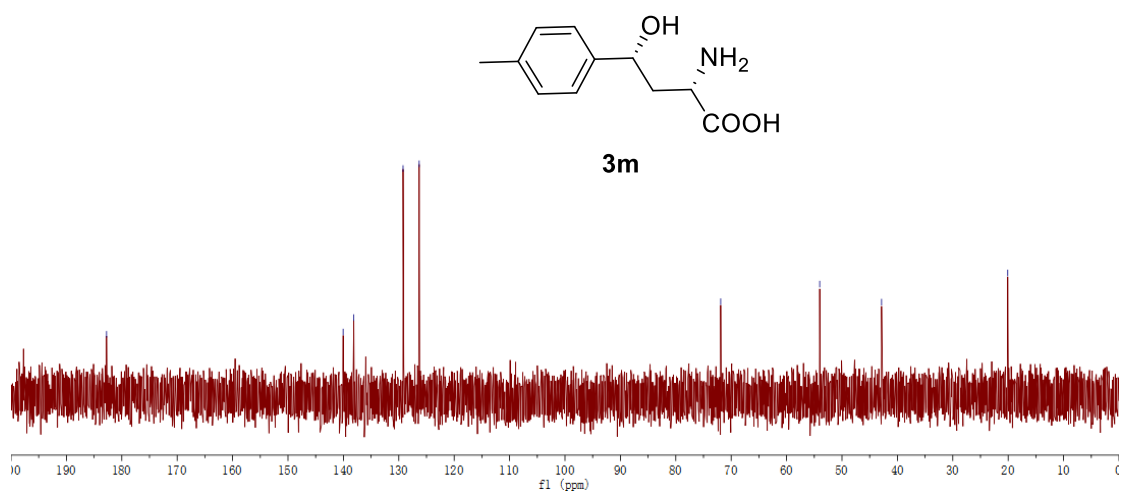



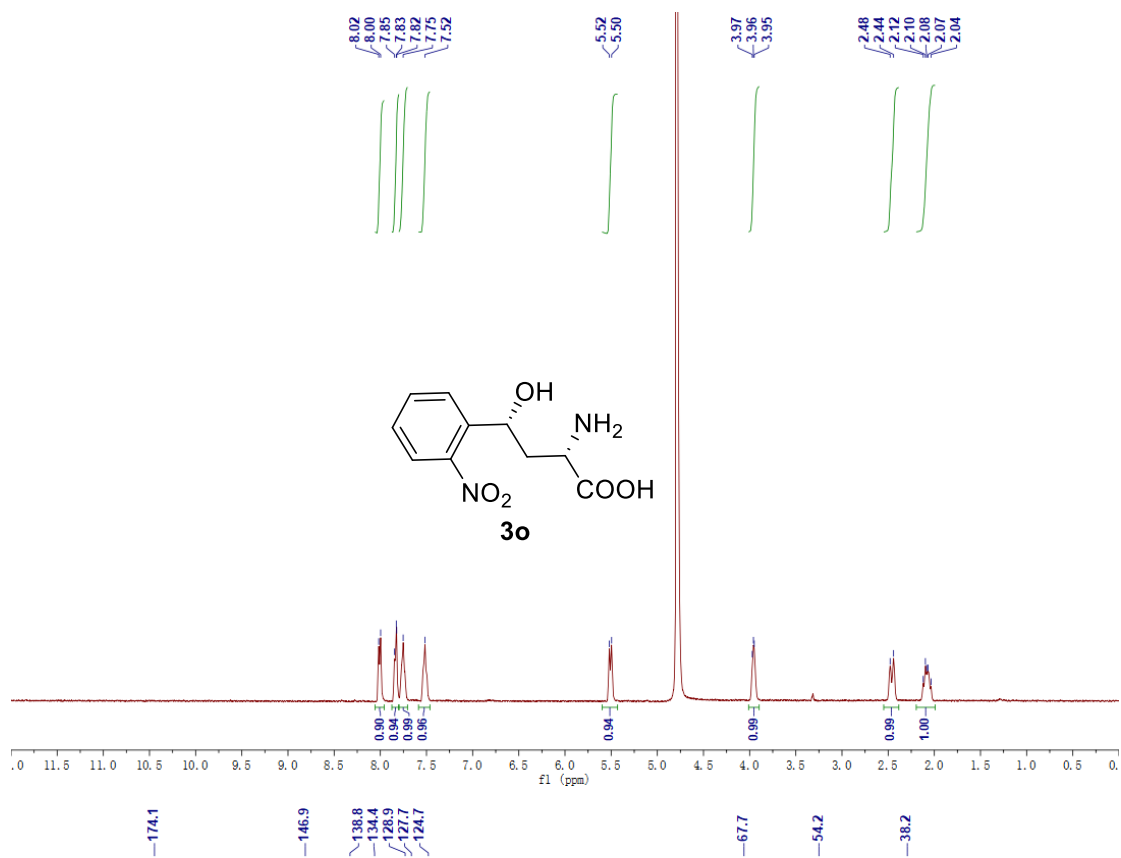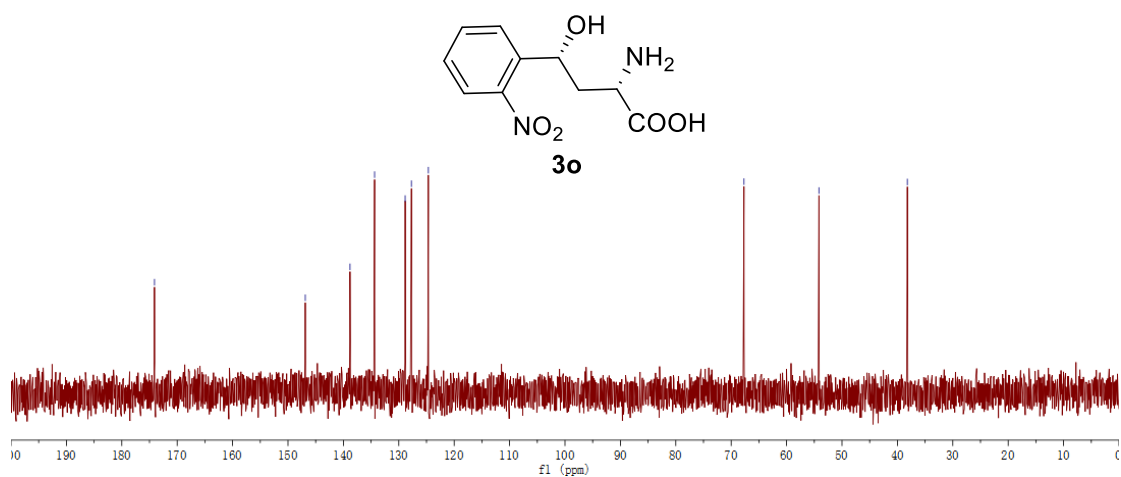

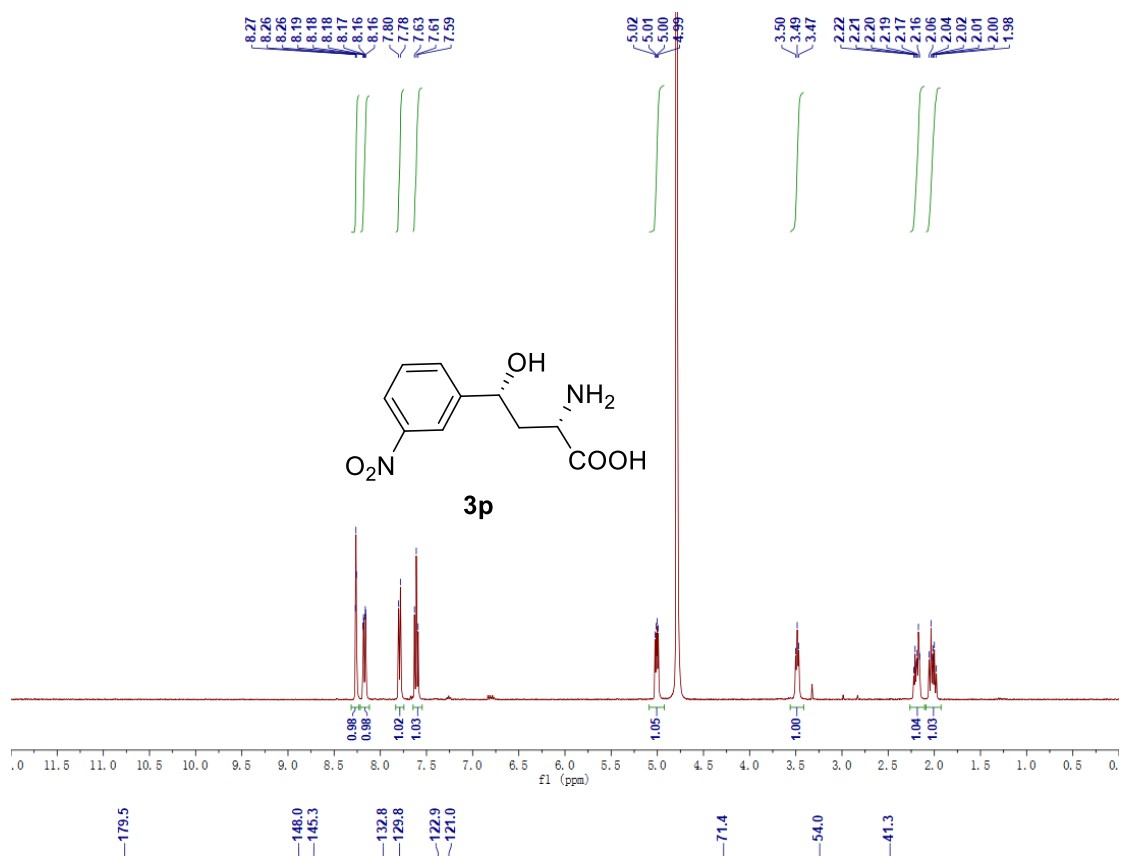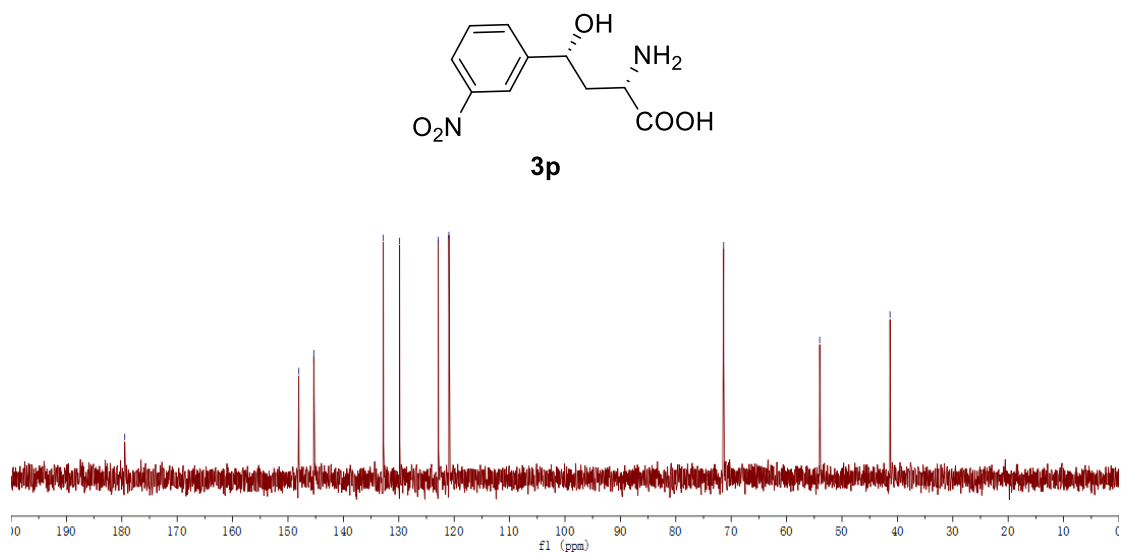

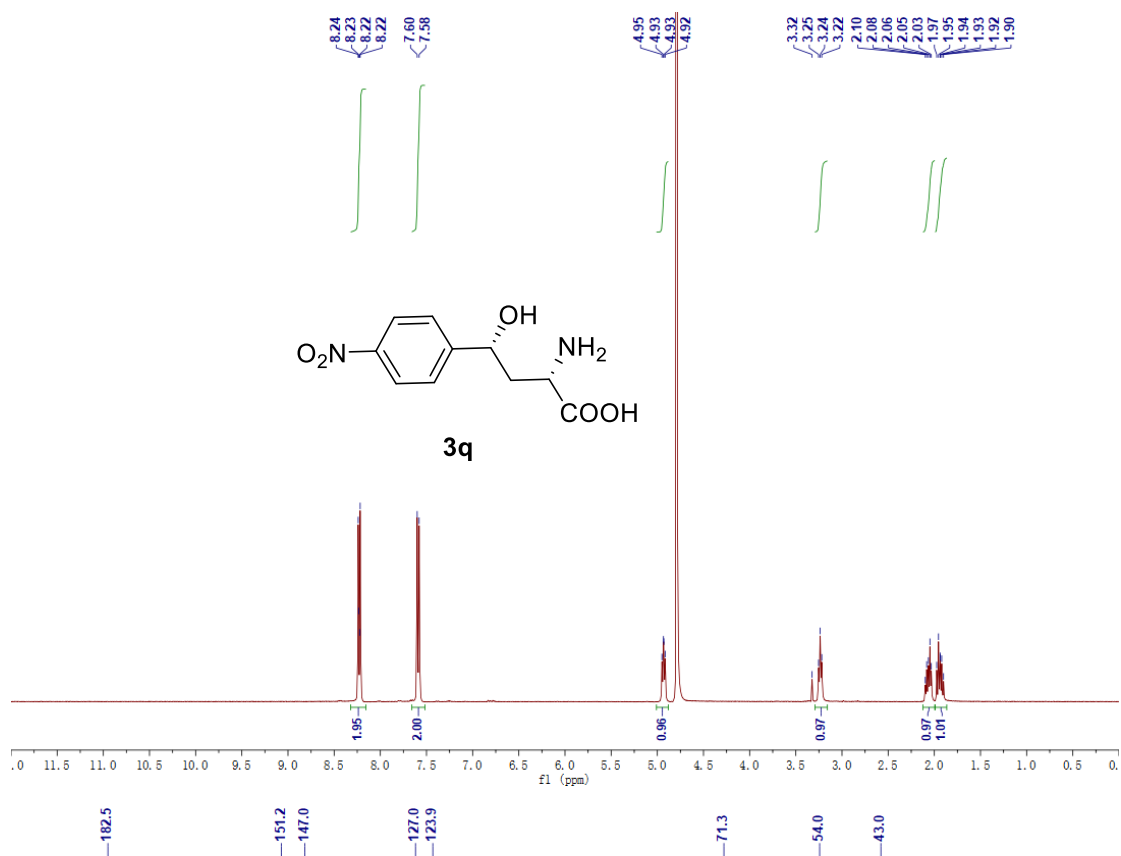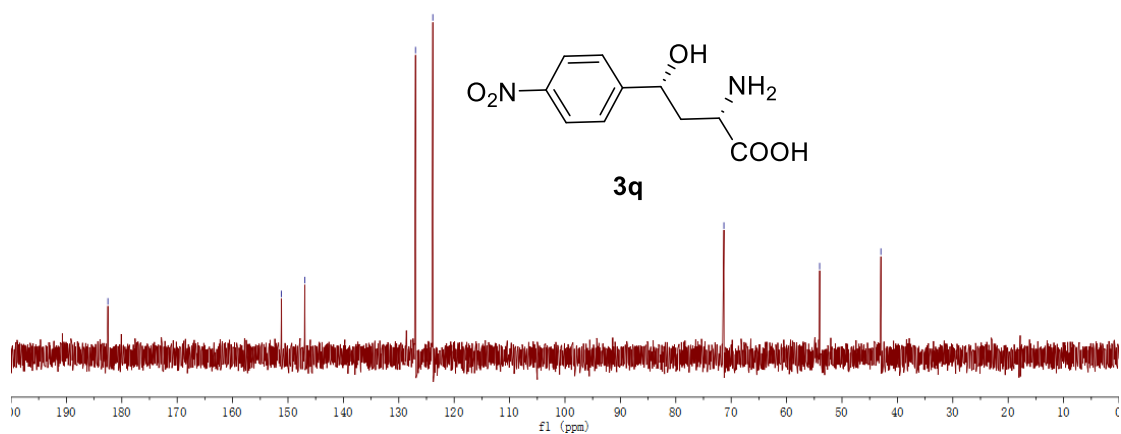

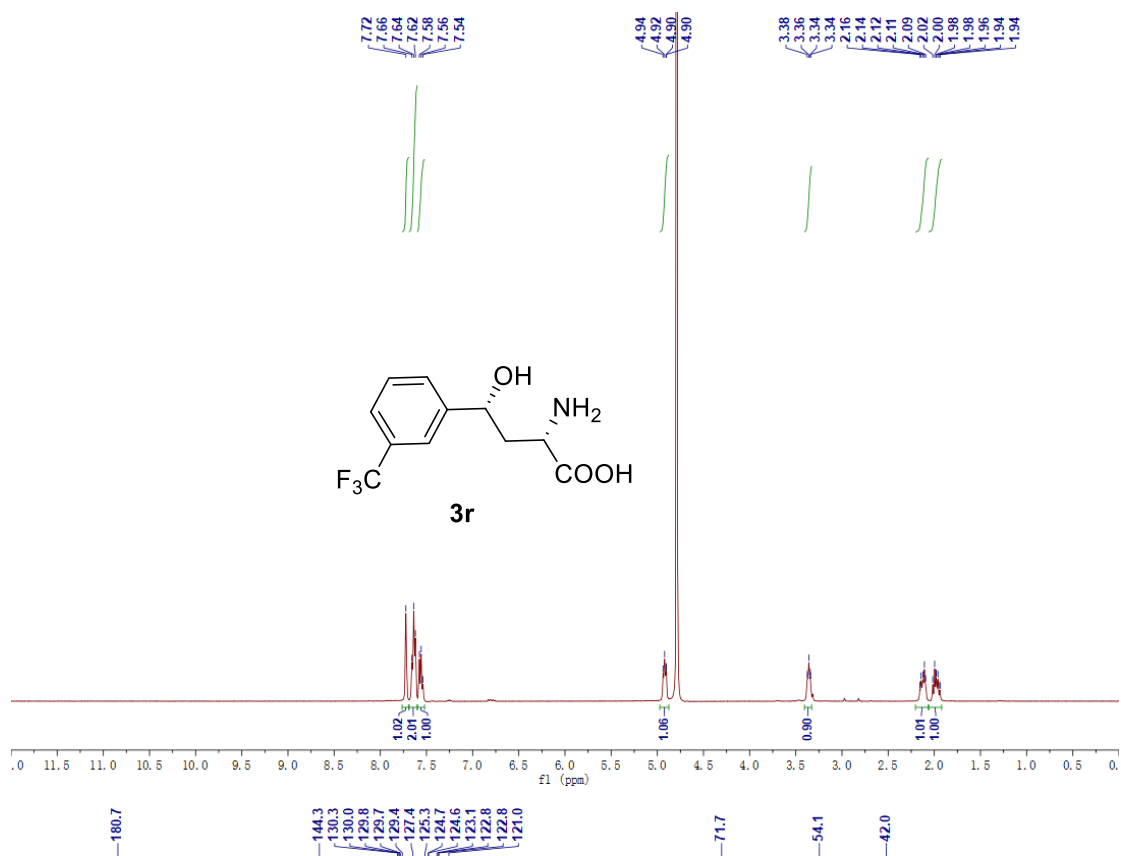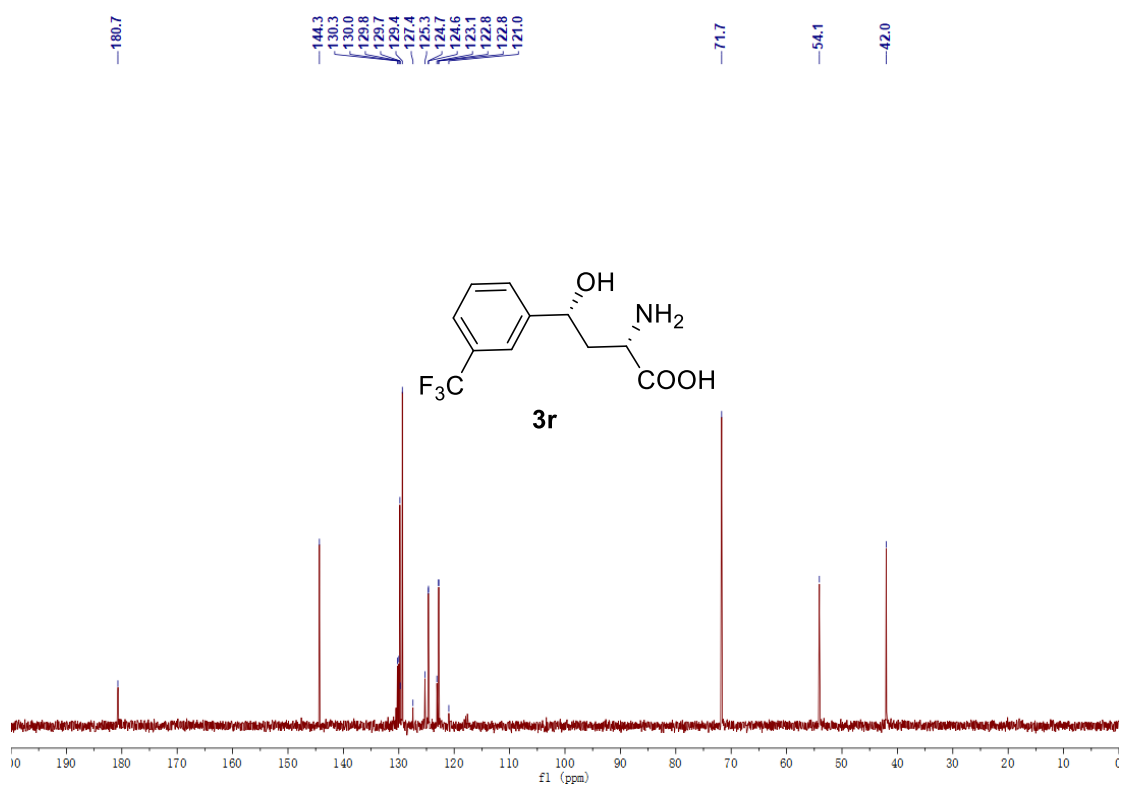

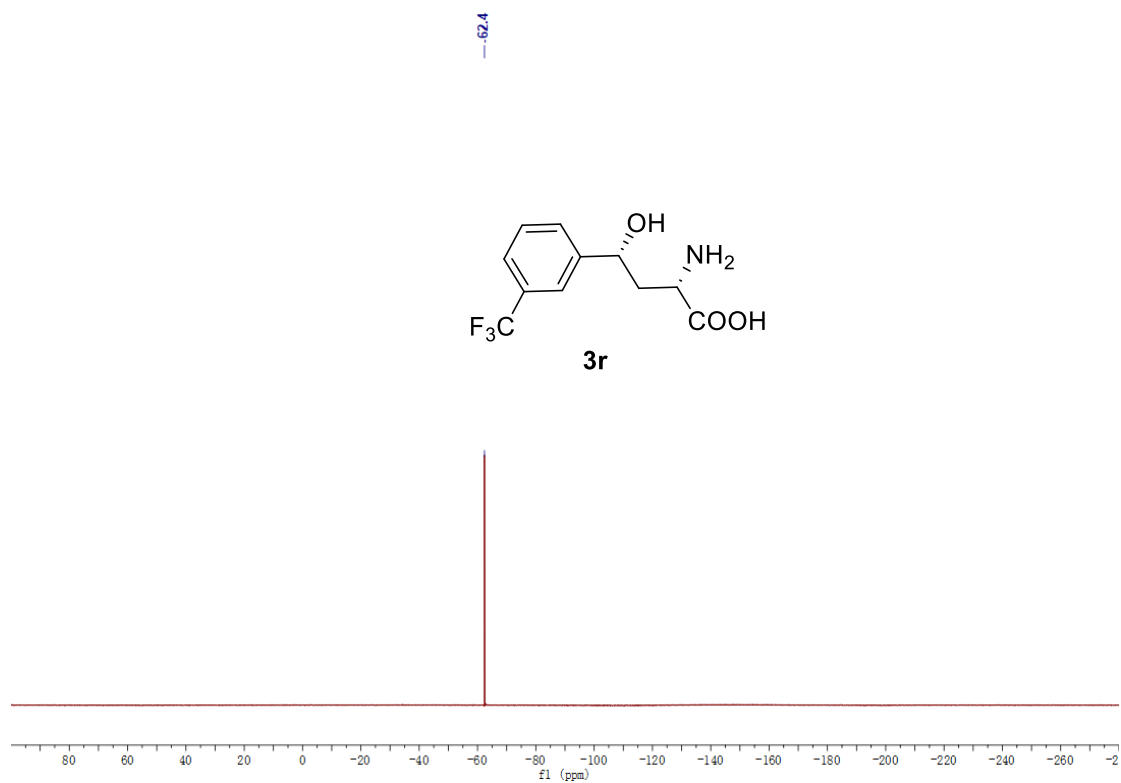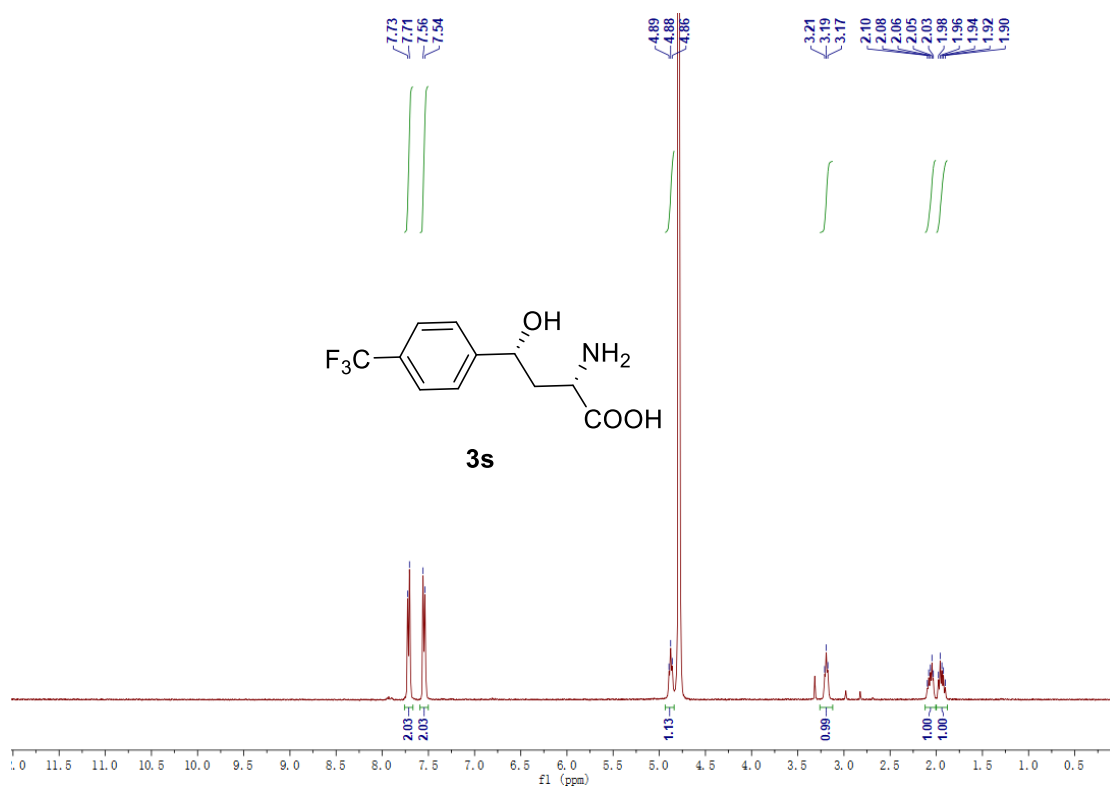

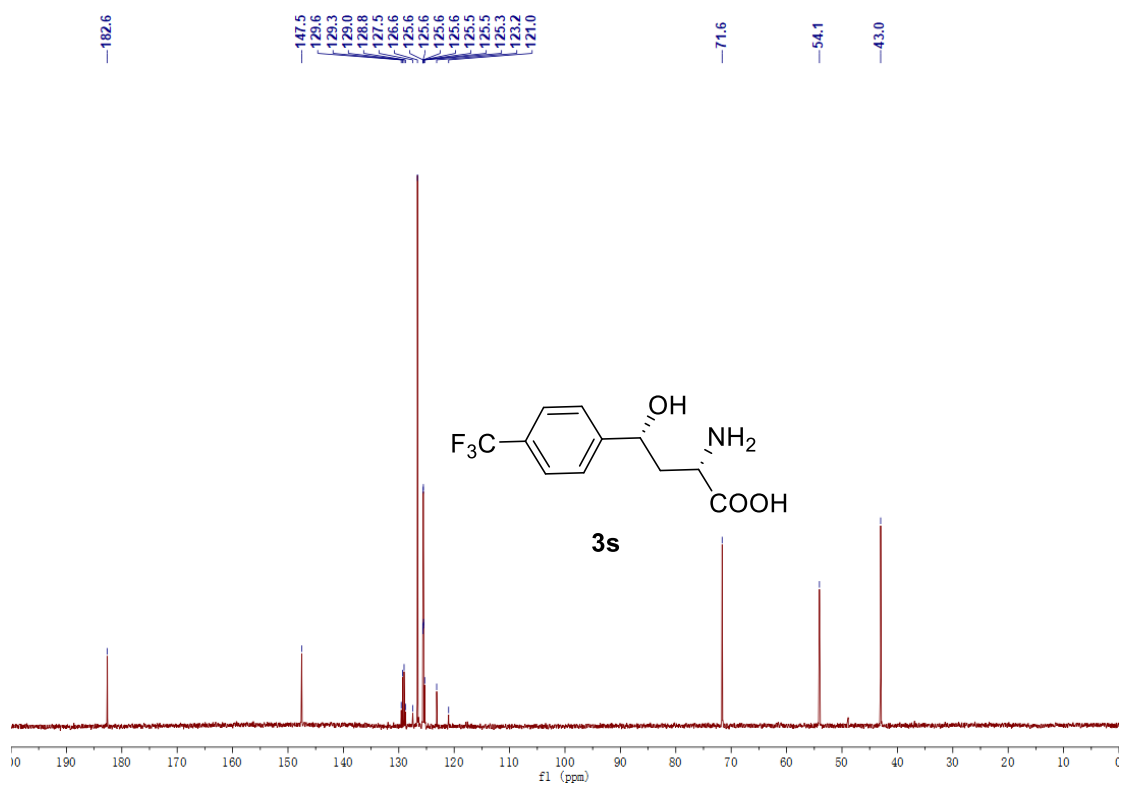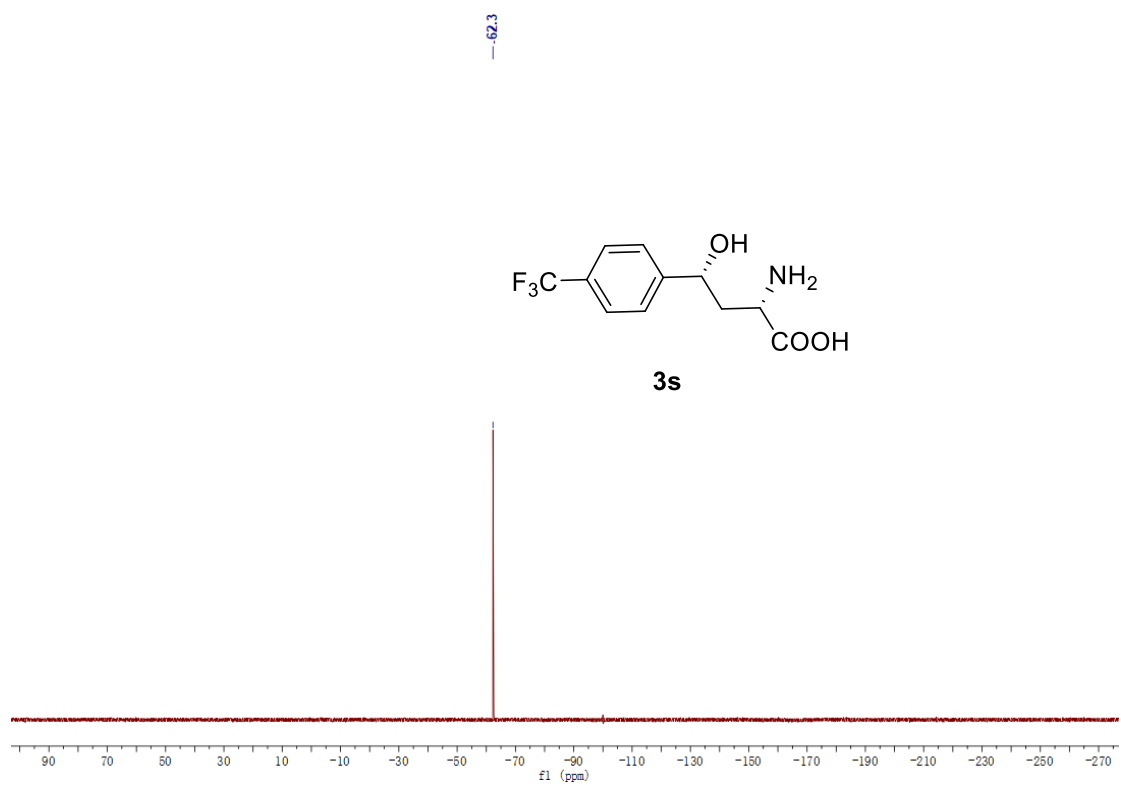

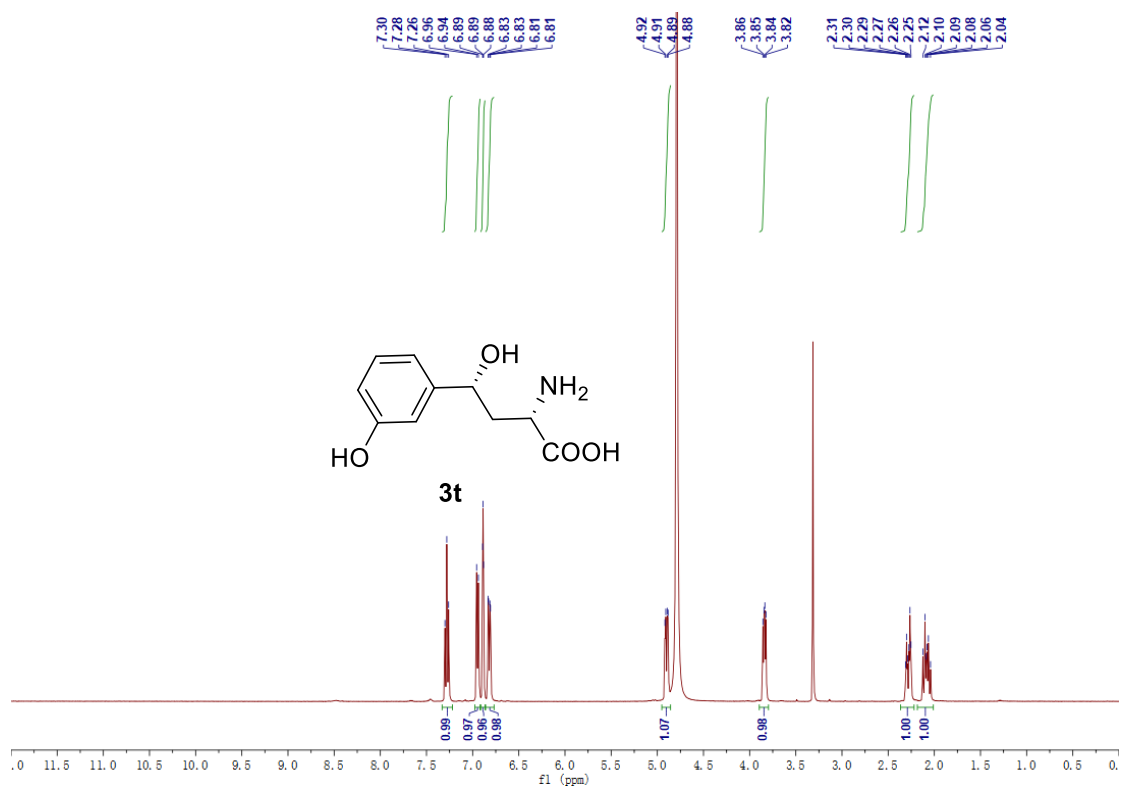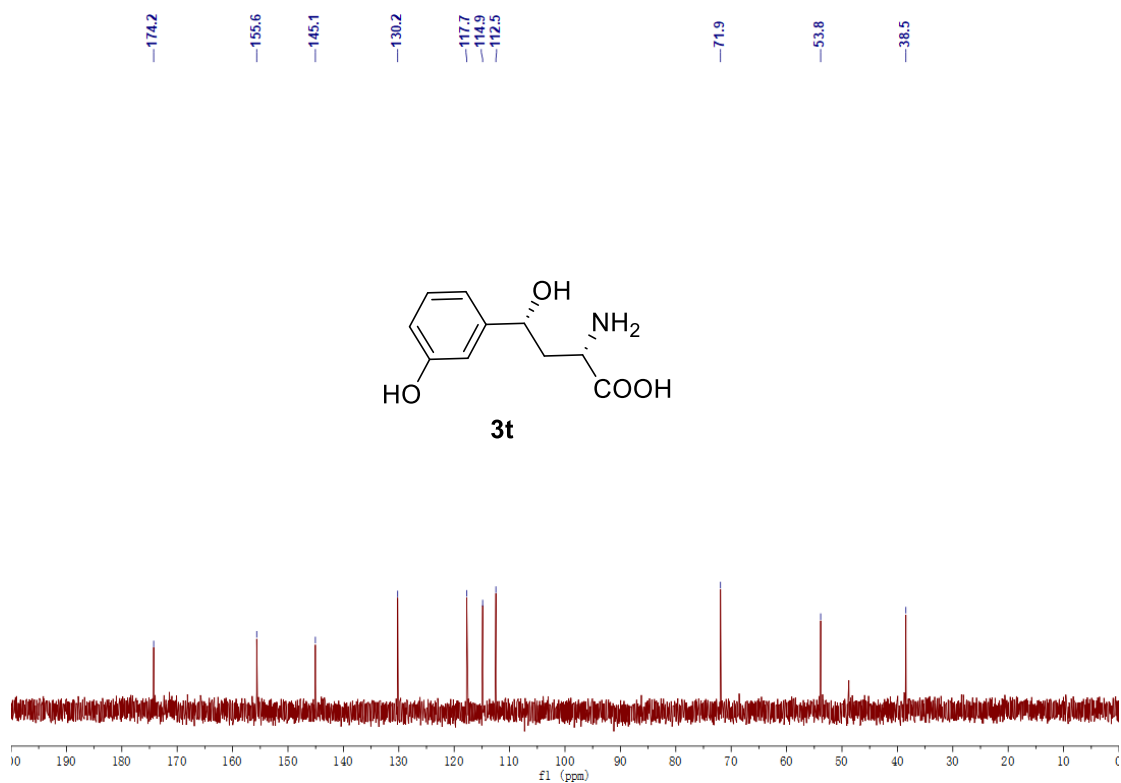

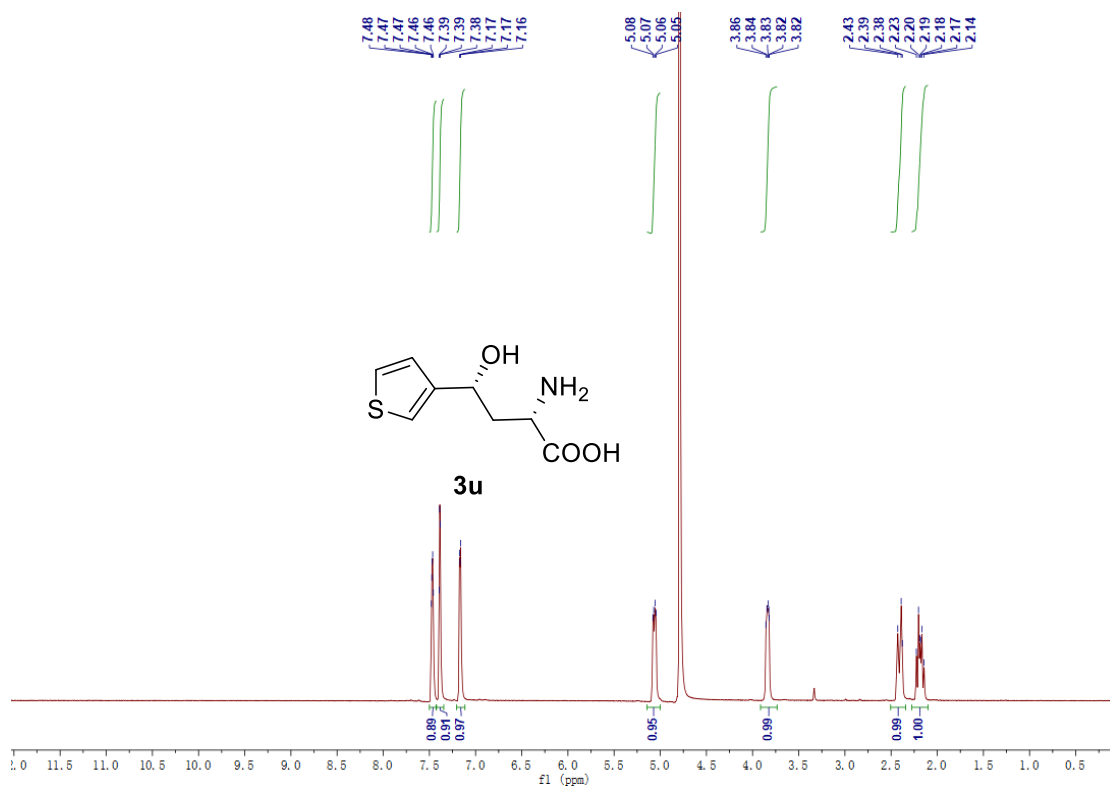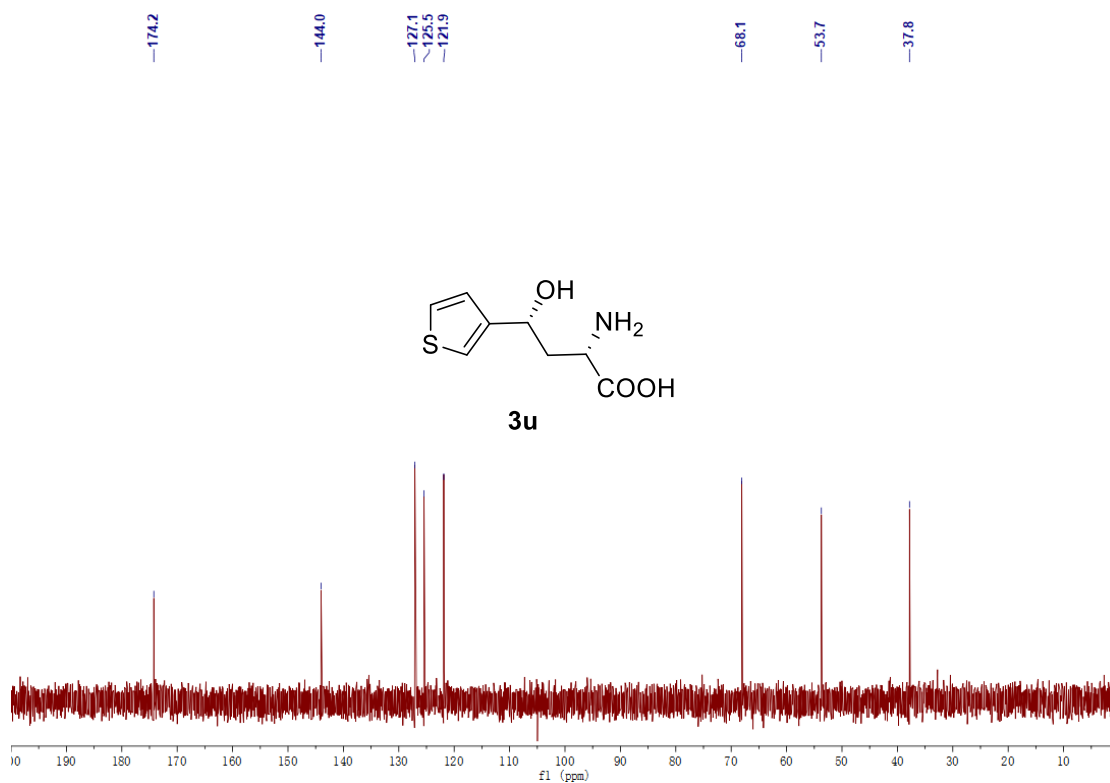



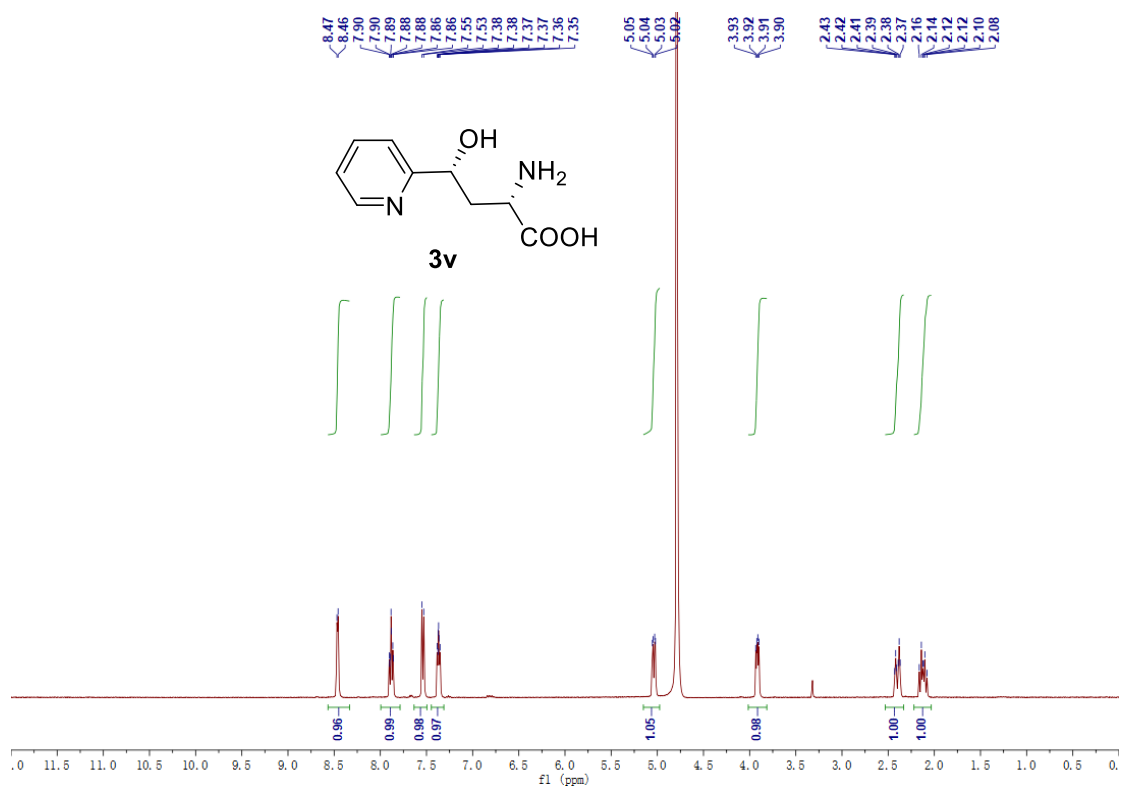

—174.2

—160.7

—148.2

—138.6

—123.5

—120.9

—72.4

—53.7

—37.1

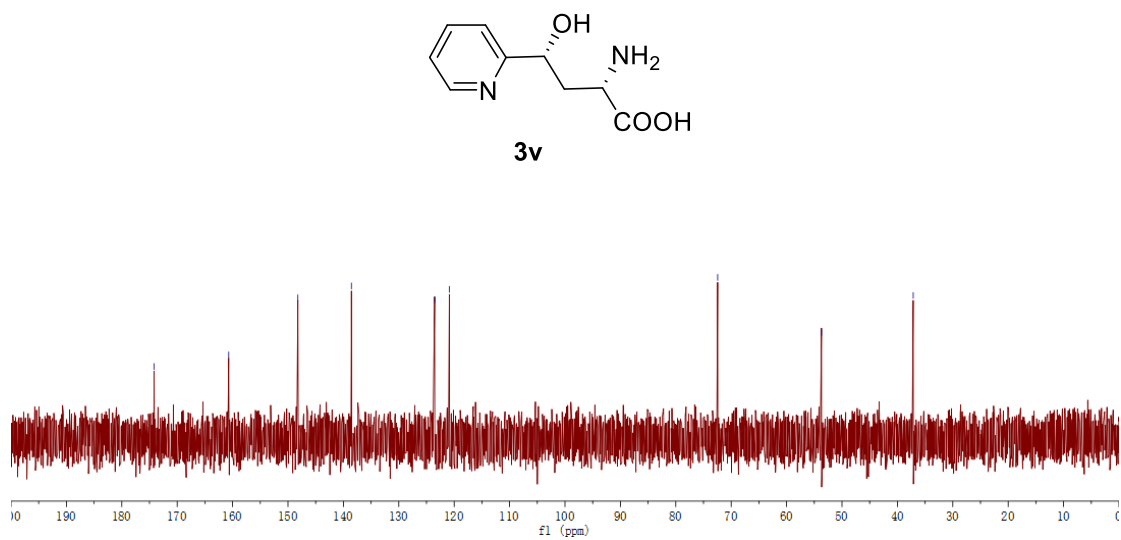

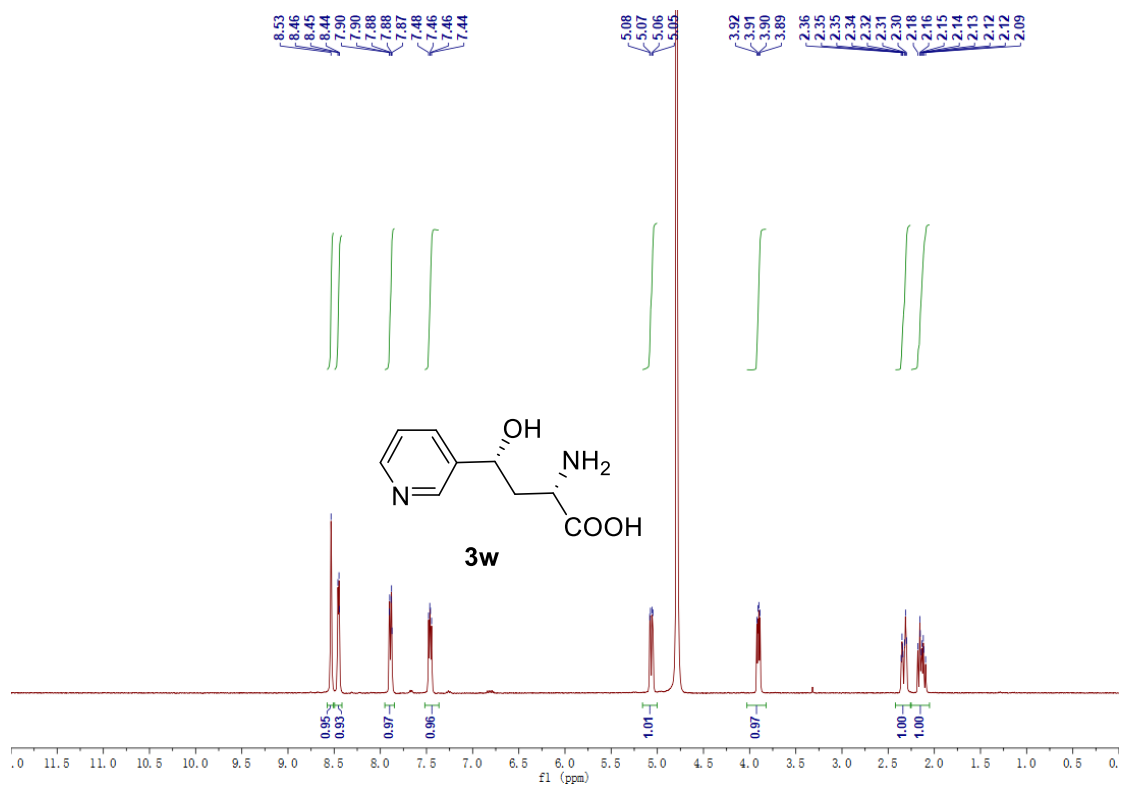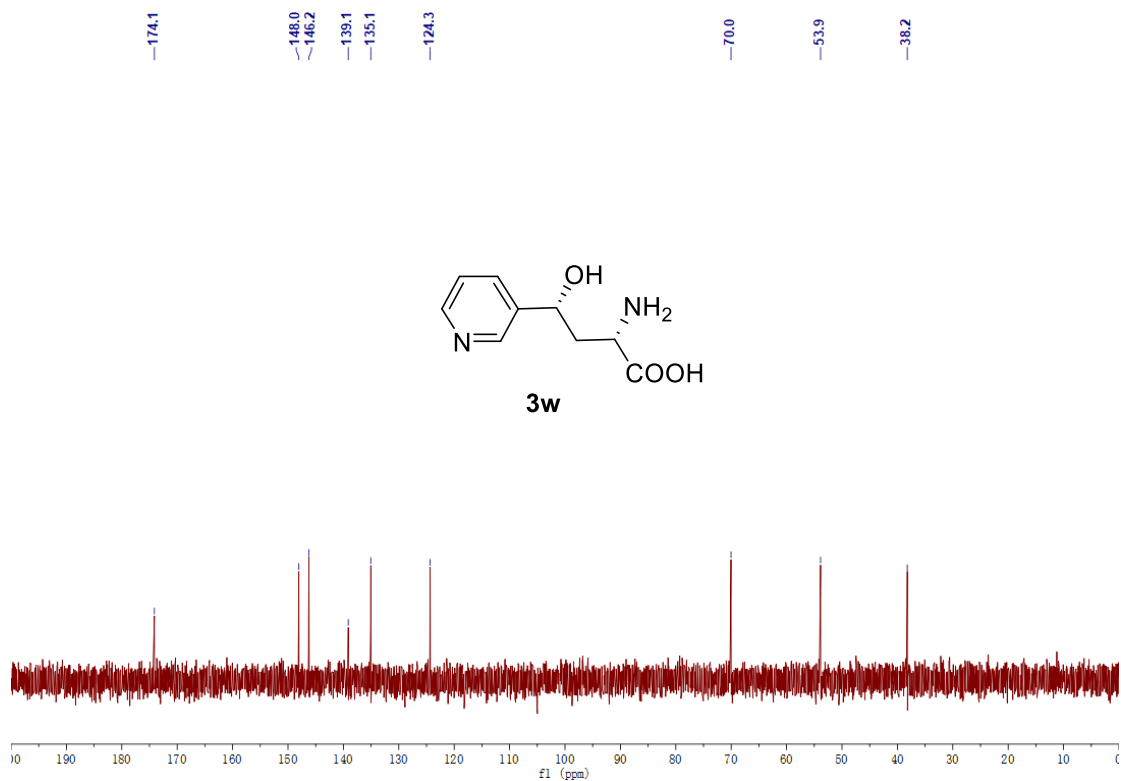

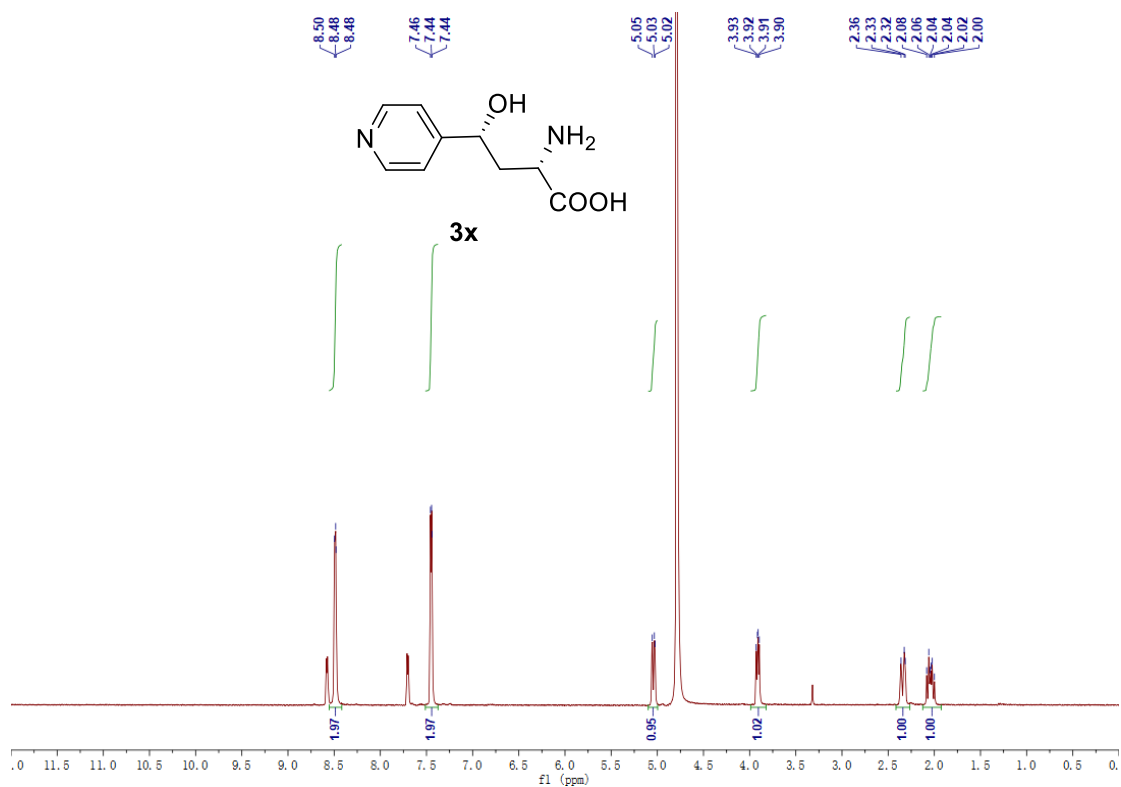

—174.1

—153.5

—148.8

—121.1

—70.8

—53.8

—38.1

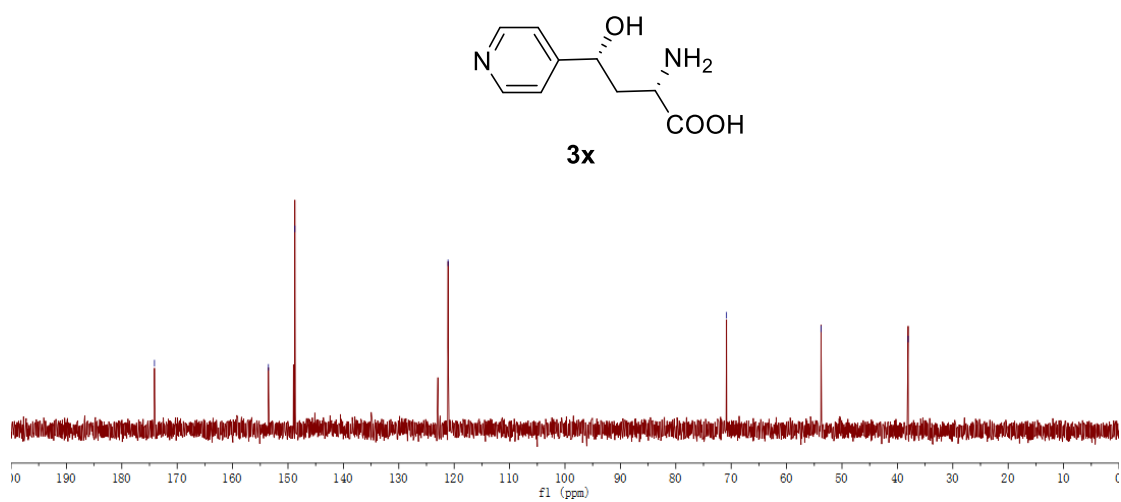

Supplement: d1cy00955a1.pdf [file d1cy00955a1.pdf]
